# Supplementary material for: α-Hydroxylactams as Efficient Entries to Diversely Functionalized Ferrociphenols: Synthesis and Antiproliferative Activity Studies
Source: MDPI journal article supplement (doi:10.3390/molecules27144549), 2022-07-16
Supplement: s1 [file s1]

## **Supplementary Materials**

### **$\alpha$ -Hydroxylactams as efficient entries to diversely functionalized ferrociphenols: Synthesis and anticancer activity studies**

Pascal Pigeon, Marie Gaschard, Mohamed Othman, Michèle Salmain and Gérard Jaouen

## Table of contents

|                                                                  |    |
|------------------------------------------------------------------|----|
| <b>Figure S1:</b> Structural data for compound <b>3a</b> .....   | 1  |
| <b>Figure S2:</b> Structural data for compound <b>3b</b> .....   | 3  |
| <b>Figure S3:</b> Structural data for compound <b>3c</b> .....   | 5  |
| <b>Figure S4:</b> Structural data for compound <b>3d</b> .....   | 7  |
| <b>Figure S5:</b> Structural data for compound <b>3e</b> .....   | 8  |
| <b>Figure S6:</b> Structural data for compound <b>3f</b> .....   | 10 |
| <b>Figure S7:</b> Structural data for compound <b>3g</b> .....   | 12 |
| <b>Figure S8:</b> Structural data for compound <b>3h</b> .....   | 14 |
| <b>Figure S9:</b> Structural data for compound <b>3i</b> .....   | 16 |
| <b>Figure S10:</b> Structural data for compound <b>3j</b> .....  | 18 |
| <b>Figure S11:</b> Structural data for compound <b>3k</b> .....  | 20 |
| <b>Figure S12:</b> Structural data for compound <b>4b</b> .....  | 22 |
| <b>Figure S13:</b> Structural data for compound <b>4c</b> .....  | 24 |
| <b>Figure S14:</b> Structural data for compound <b>4d</b> .....  | 26 |
| <b>Figure S15:</b> Structural data for compound <b>4f</b> .....  | 28 |
| <b>Figure S16:</b> Structural data for compound <b>4g</b> .....  | 30 |
| <b>Figure S17:</b> Structural data for compound <b>4h</b> .....  | 32 |
| <b>Figure S18:</b> Structural data for compound <b>6a</b> .....  | 34 |
| <b>Figure S19:</b> Structural data for compound <b>7a</b> .....  | 37 |
| <b>Figure S20:</b> Structural data for compound <b>6b</b> .....  | 40 |
| <b>Figure S21:</b> Structural data for compound <b>6c</b> .....  | 41 |
| <b>Figure S22:</b> Structural data for compound <b>6e</b> .....  | 44 |
| <b>Figure S23:</b> Structural data for compound <b>6f</b> .....  | 46 |
| <b>Figure S24:</b> Structural data for compound <b>6g</b> .....  | 48 |
| <b>Figure S25:</b> Structural data for compound <b>6h</b> .....  | 50 |
| <b>Figure S26:</b> Structural data for compound <b>6i</b> .....  | 52 |
| <b>Figure S27:</b> Structural data for compound <b>6j</b> .....  | 54 |
| <b>Figure S28:</b> Structural data for compound <b>7j</b> .....  | 55 |
| <b>Figure S29:</b> Structural data for compound <b>8j</b> .....  | 57 |
| <b>Figure S30:</b> Structural data for compound <b>9j</b> .....  | 60 |
| <b>Figure S31:</b> Structural data for compound <b>10b</b> ..... | 62 |
| <b>Figure S32:</b> Structural data for compound <b>10e</b> ..... | 65 |
| <b>Figure S33:</b> Structural data for compound <b>10f</b> ..... | 67 |
| <b>Figure S34:</b> Structural data for compound <b>10g</b> ..... | 69 |
| <b>Figure S35:</b> Structural data for compound <b>10h</b> ..... | 71 |
| <b>Figure S36:</b> Structural data for compound <b>11</b> .....  | 73 |
| <b>Figure S37:</b> Structural data for compound <b>13</b> .....  | 76 |
| <b>Figure S38:</b> Structural data for compound <b>14</b> .....  | 78 |
| <b>Figure S39:</b> Structural data for compound <b>15</b> .....  | 80 |
| <b>Figure S40:</b> Structural data for compound <b>16</b> .....  | 83 |
| <b>Figure S41:</b> Structural data for compound <b>17</b> .....  | 86 |
| <b>Figure S42:</b> Structural data for compound <b>20</b> .....  | 88 |
| <b>Figure S43:</b> Structural data for compound <b>21</b> .....  | 90 |
| <b>Figure S44:</b> Structural data for compound <b>22</b> .....  | 93 |
| <b>Figure S45:</b> Structural data for compound <b>23</b> .....  | 96 |
| <b>Figure S46:</b> Structural data for compound <b>24</b> .....  | 99 |

|                                                                                                               |     |
|---------------------------------------------------------------------------------------------------------------|-----|
| <b>Figure S47:</b> Structural data for compound <b>25</b> .....                                               | 102 |
| <b>Figure S48:</b> Structural data for compound <b>26</b> .....                                               | 105 |
| <b>Figure S49:</b> Structural data for compound <b>27</b> .....                                               | 108 |
| <b>Table S1:</b> Crystallographic data for <b>15, 23</b> and <b>25</b> .....                                  | 111 |
| <b>Figure S50:</b> Solubility studies for compounds <b>18, 20, 22, 24</b> and <b>27</b> .....                 | 112 |
| <b>Figure S51:</b> Conversion to quinone methide: UV-VIS spectra of <b>19, 20, 22, 23</b> and <b>25</b> ..... | 114 |
| <b>Figure S52:</b> MTT cell viability assay for compounds <b>Fc-OH-TAM-3, 3h, 20, 22, 23</b> and <b>25</b> .. | 115 |
| <b>Figure S53:</b> RP-HPLC traces for compounds <b>Fc-OH-TAM-3, 3h, 20, 22, 23</b> and <b>25</b> .....        | 118 |

**Figure S1:**  $^1\text{H}$  (in  $\text{CDCl}_3$ ),  $^{13}\text{C}$  (in  $\text{CDCl}_3$ ) NMR, HR-MS and IR data for compound **3a**

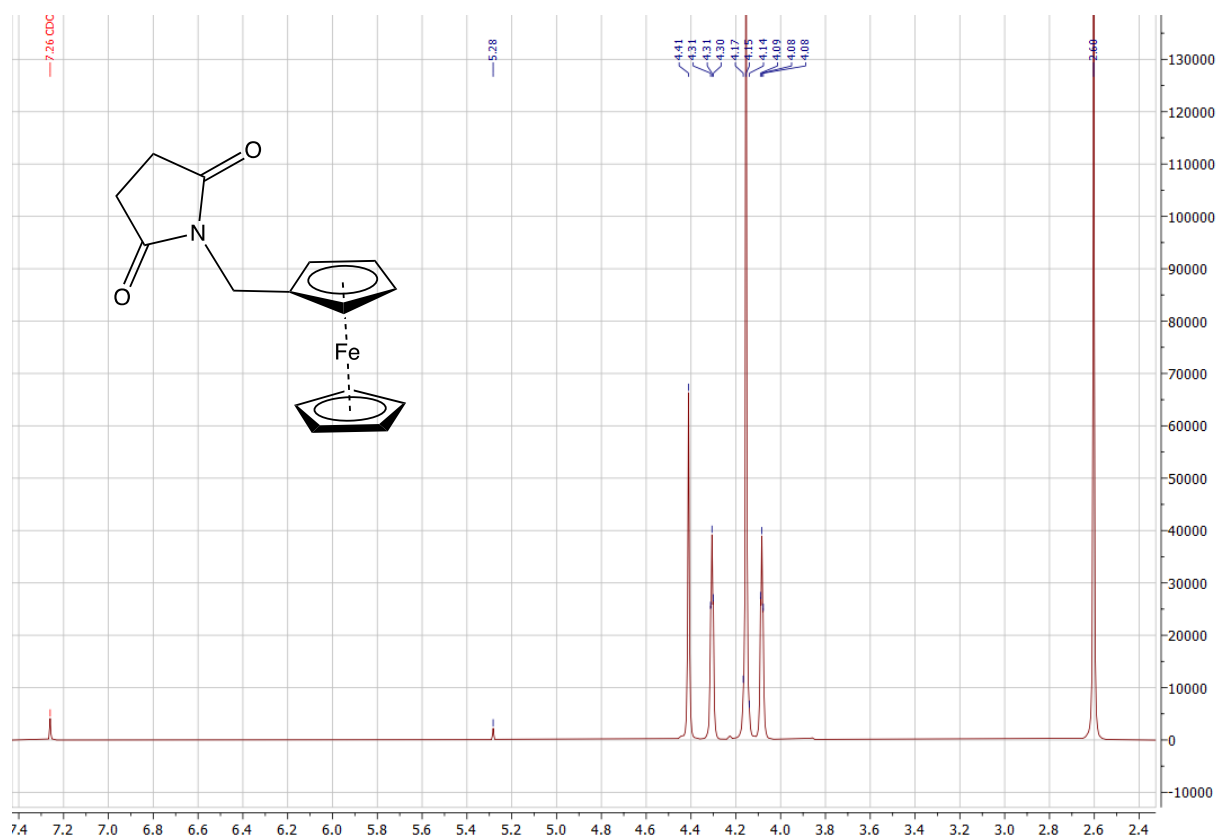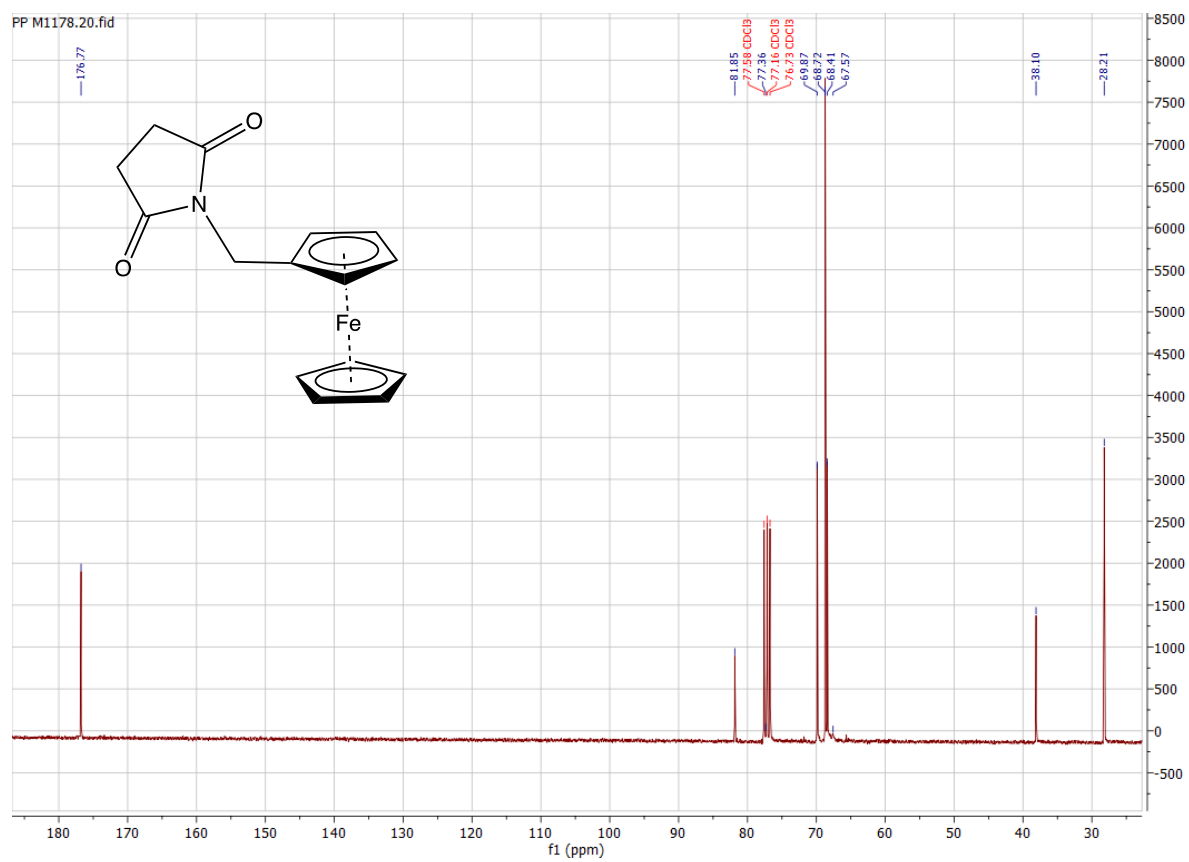



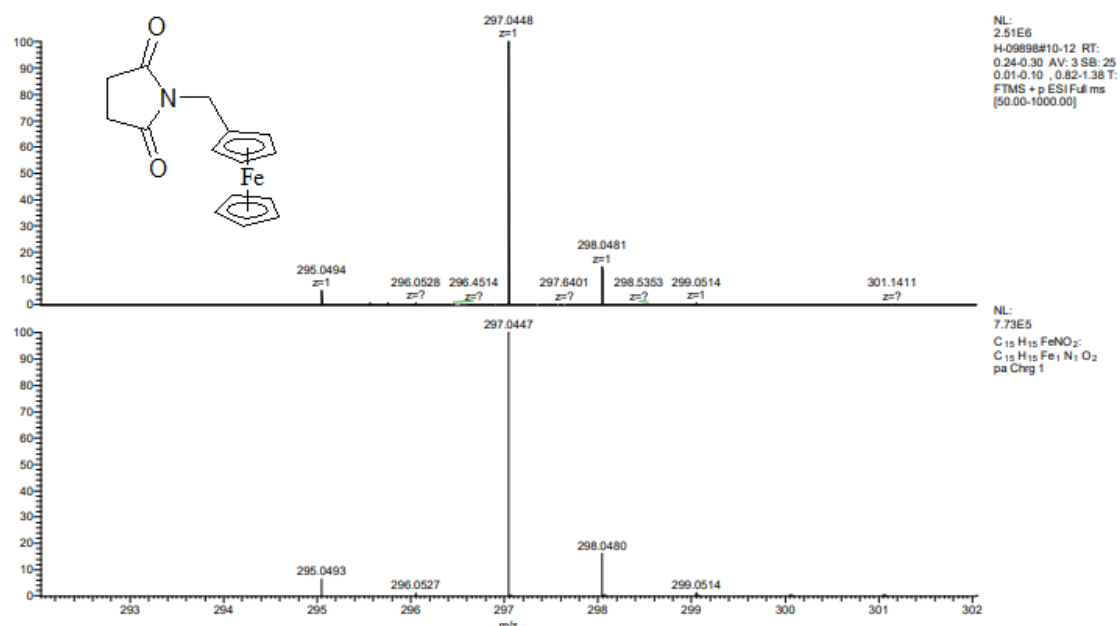

## Experimental/theoretical isotopic pattern MS spectrum

Error = 0.4 ppm; Relative Intensity (%) 100

HRMS (ESI) m/z: [M]<sup>+</sup> Calcd for C<sub>15</sub>H<sub>15</sub>FeNO<sub>2</sub> 297.0447 . Found 297.0448; (Error: 0.4 ppm).

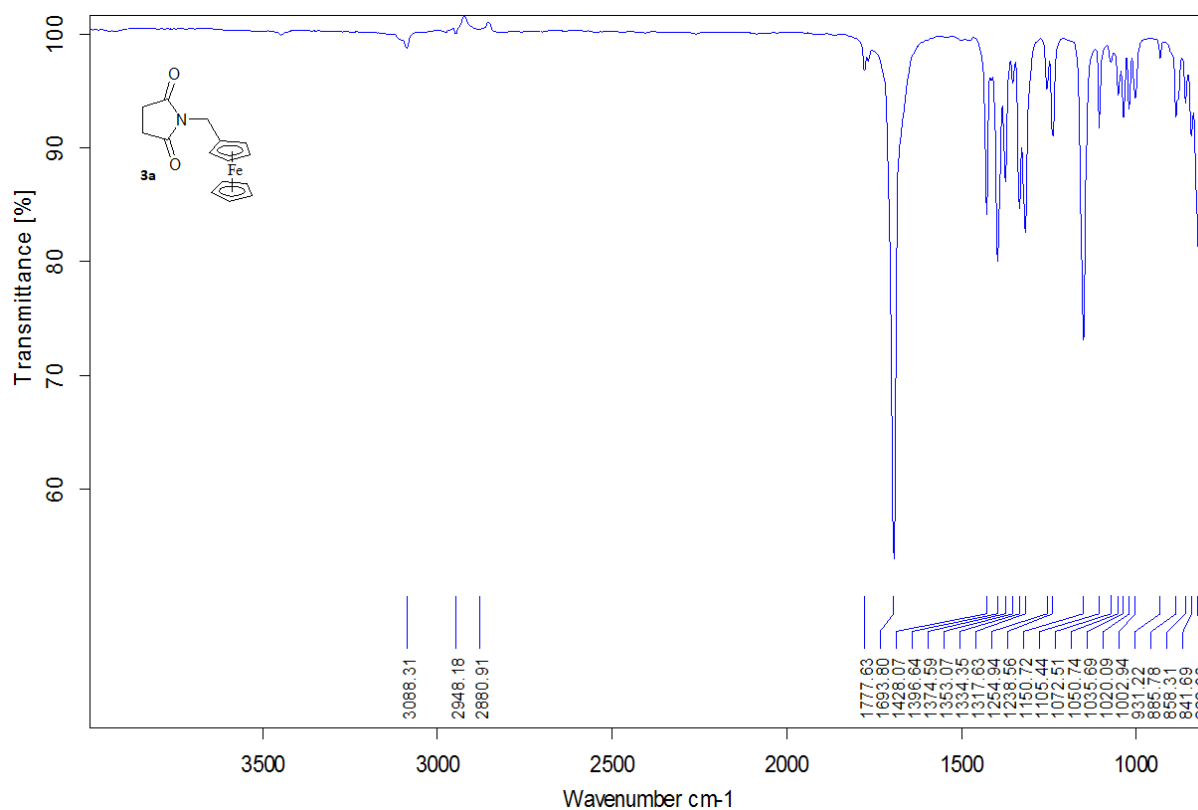

**Figure S2:**  $^1\text{H}$  (in  $\text{CDCl}_3$ ),  $^{13}\text{C}$  (in  $\text{CDCl}_3$ ) NMR, HR-MS and IR data for compound **3b**

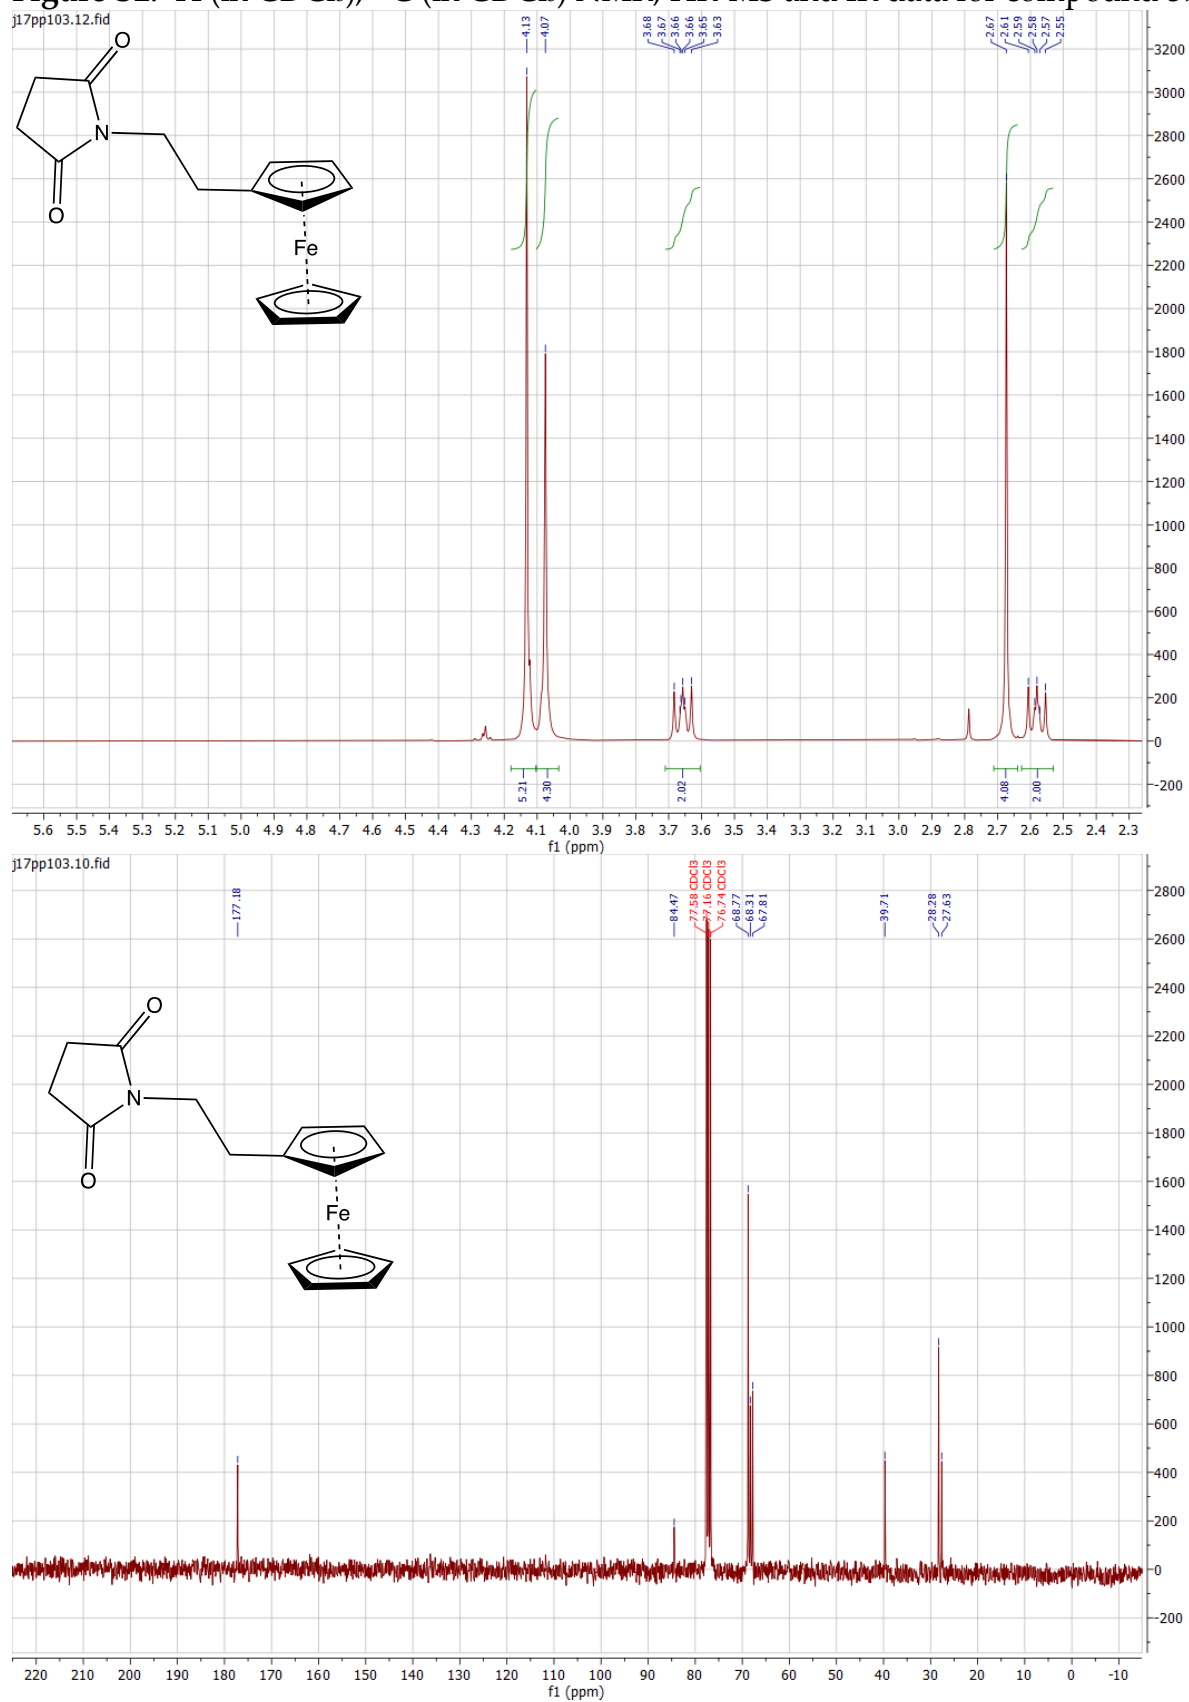

# Single Mass Analysis

Tolerance = 5.0 PPM / DBE: min = -1.5, max = 100.0

Element prediction: Off

Number of isotope peaks used for i-FIT = 9

Monoisotopic Mass, Odd Electron Ions

291 formula(e) evaluated with 1 results within limits (all results (up to 1000) for each mass)

Elements Used:

C: 0-100 H: 1-120 N: 0-10 O: 0-10 Fe: 1-1

06-Sep-2013 5:7:22

ENSCP\_P729 21 (0.572) Cm (18:24)

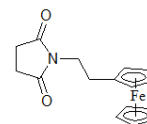

LCT Premier XE KE483  
1: TOF MS ES+  
2.33e+004

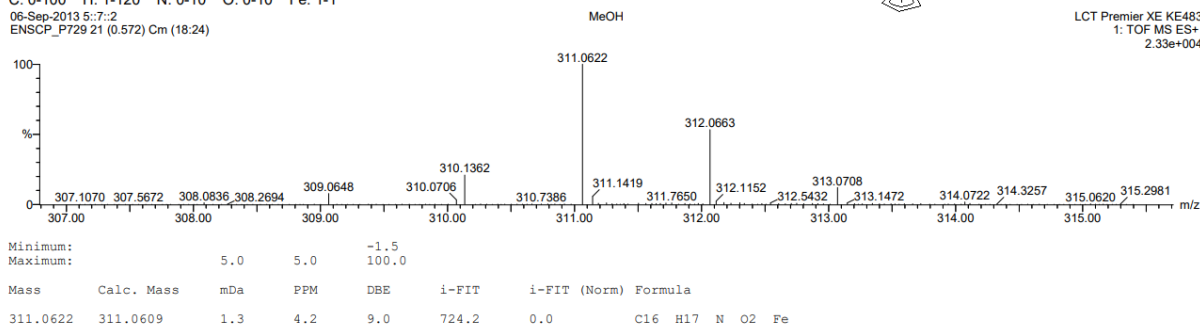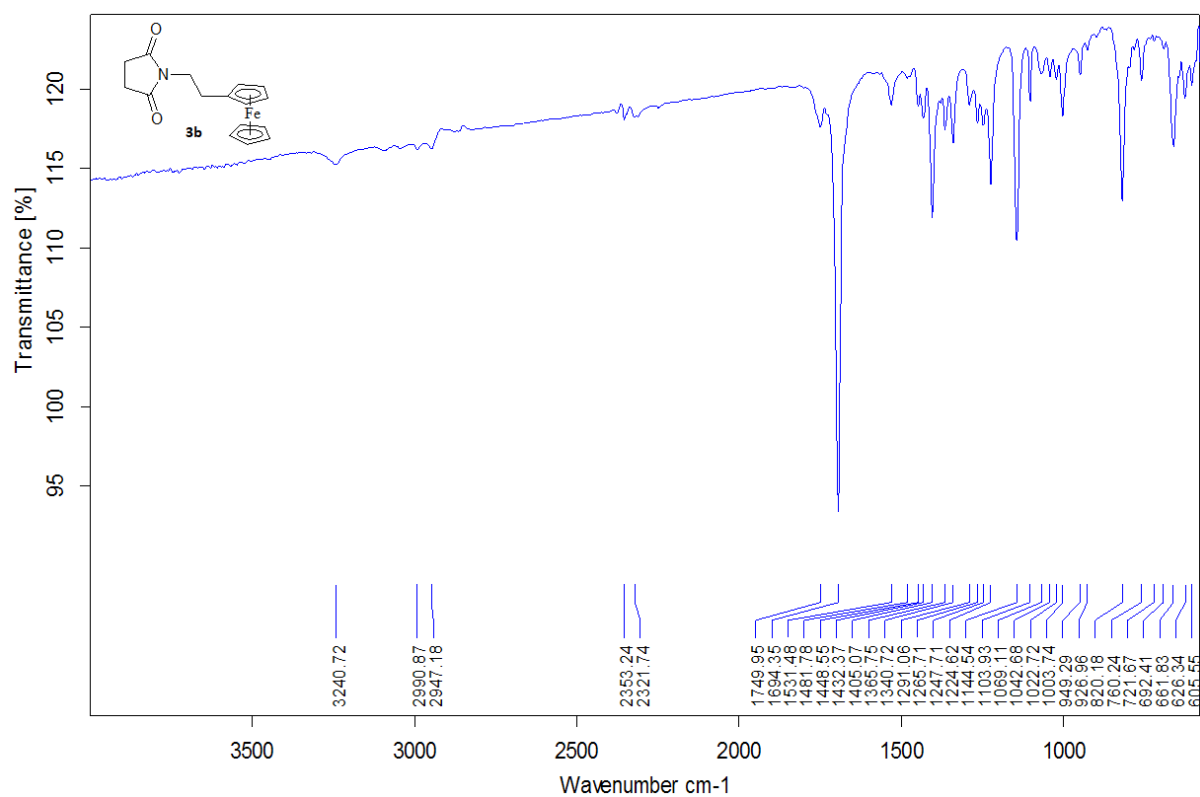

**Figure S3:**  $^1\text{H}$  (in  $\text{CDCl}_3$ ),  $^{13}\text{C}$  (in  $\text{CDCl}_3$ ) NMR, HR-MS and IR data for compound **3c**

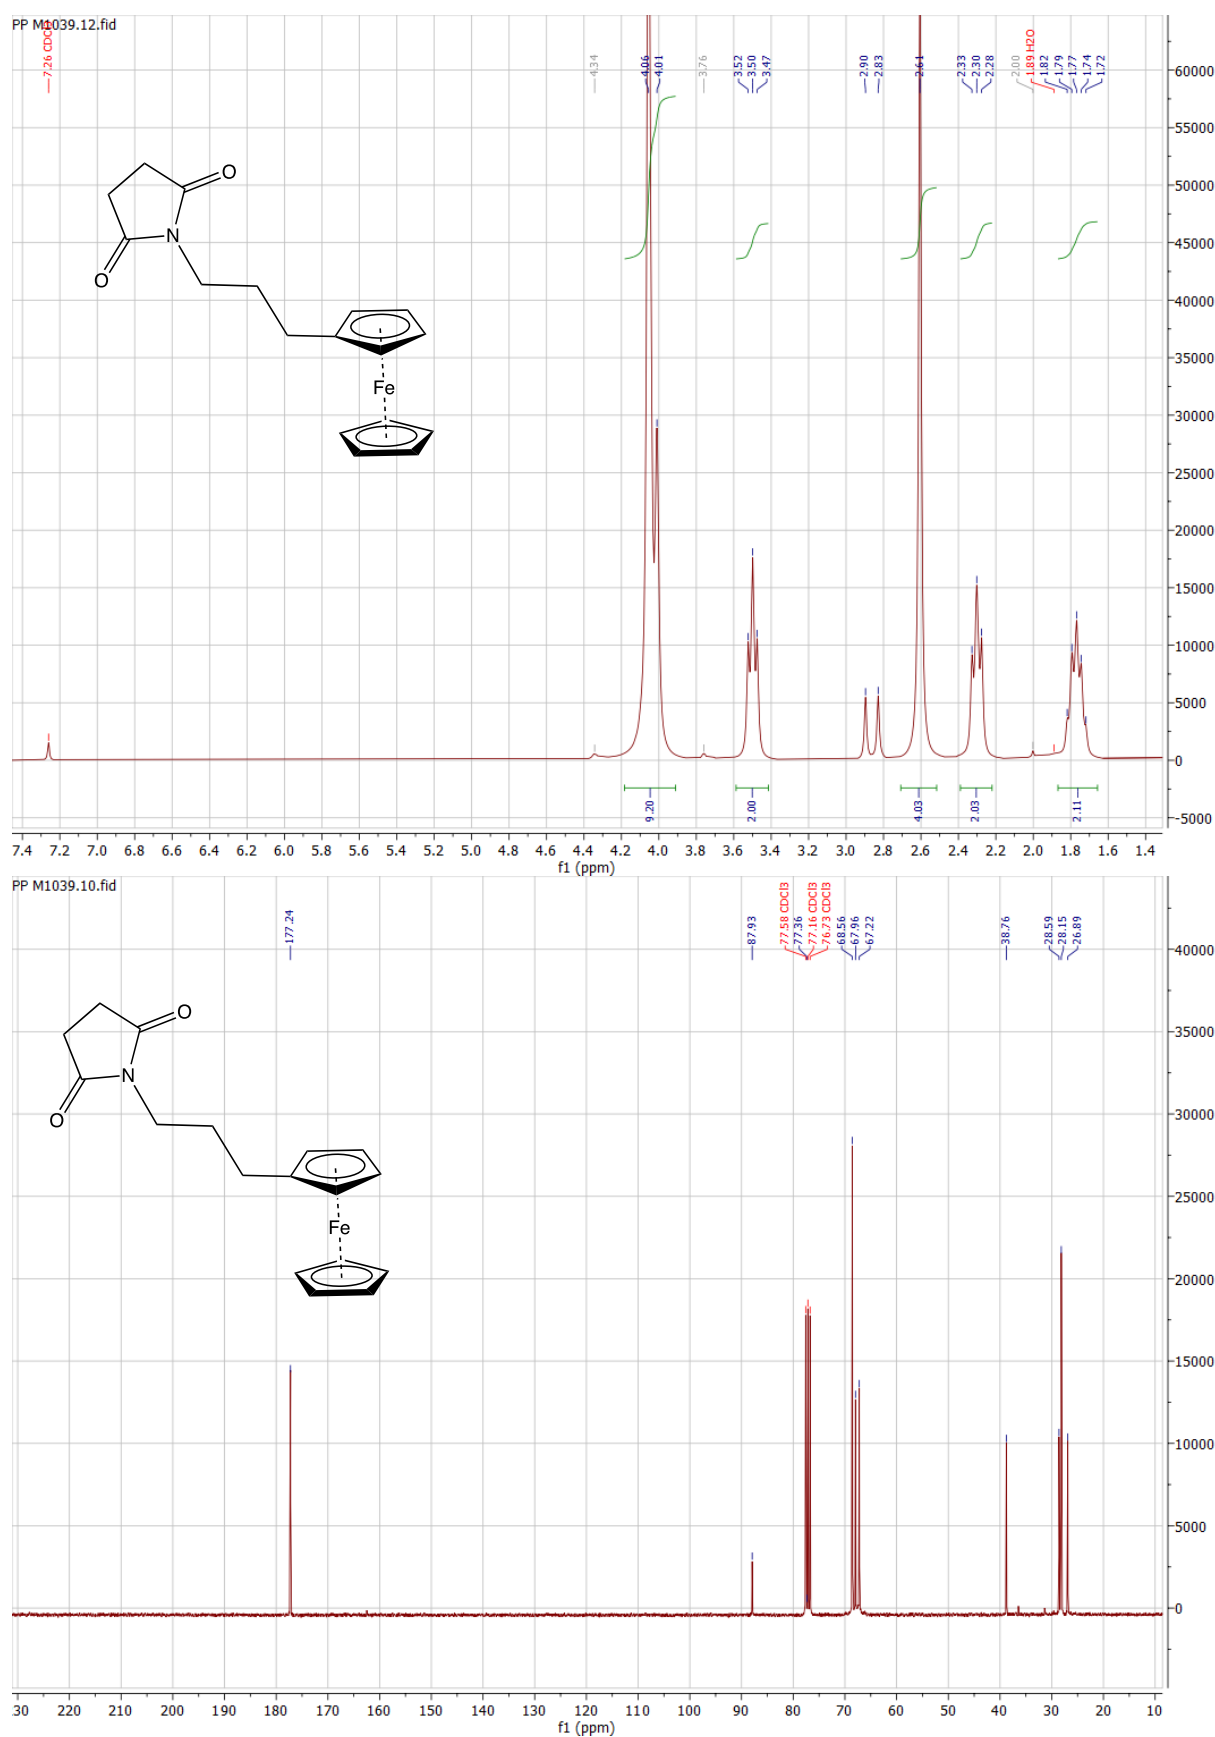

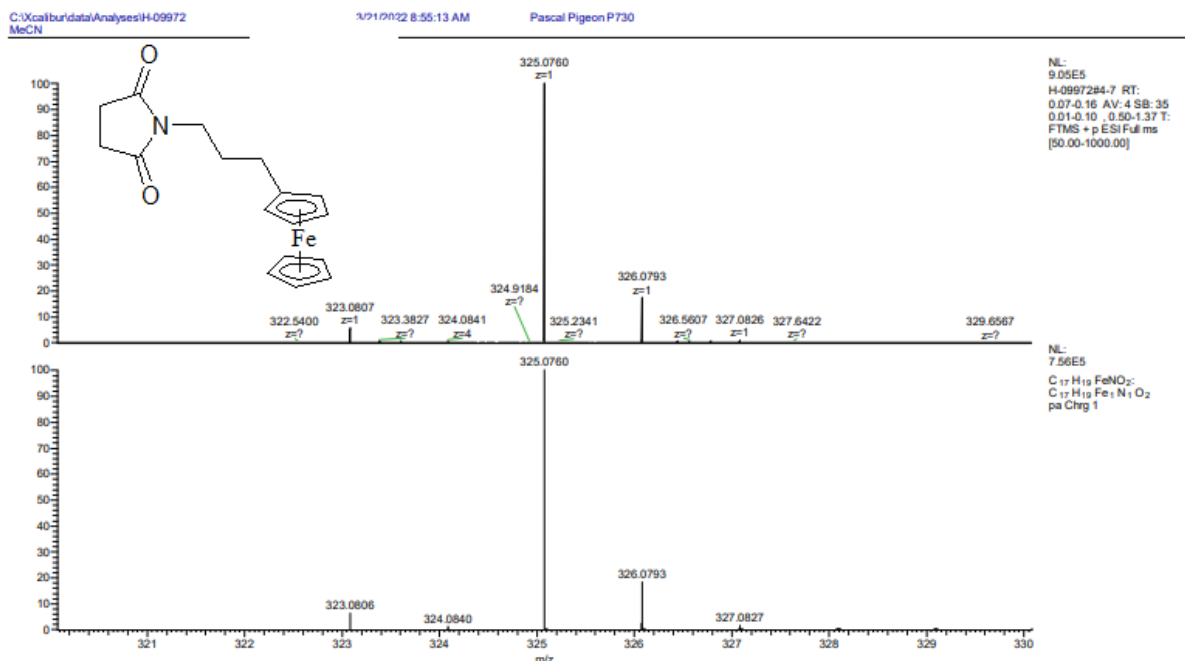

## Experimental/theoretical isotopic pattern MS spectrum

Error = 0.1 ppm; Relative Intensity (%) 100

HRMS (ESI) m/z: [M]<sup>+</sup> Calcd for C<sub>17</sub>H<sub>19</sub>FeNO<sub>2</sub> 325.0760 . Found 325.076; (Error: 0.1 ppm).

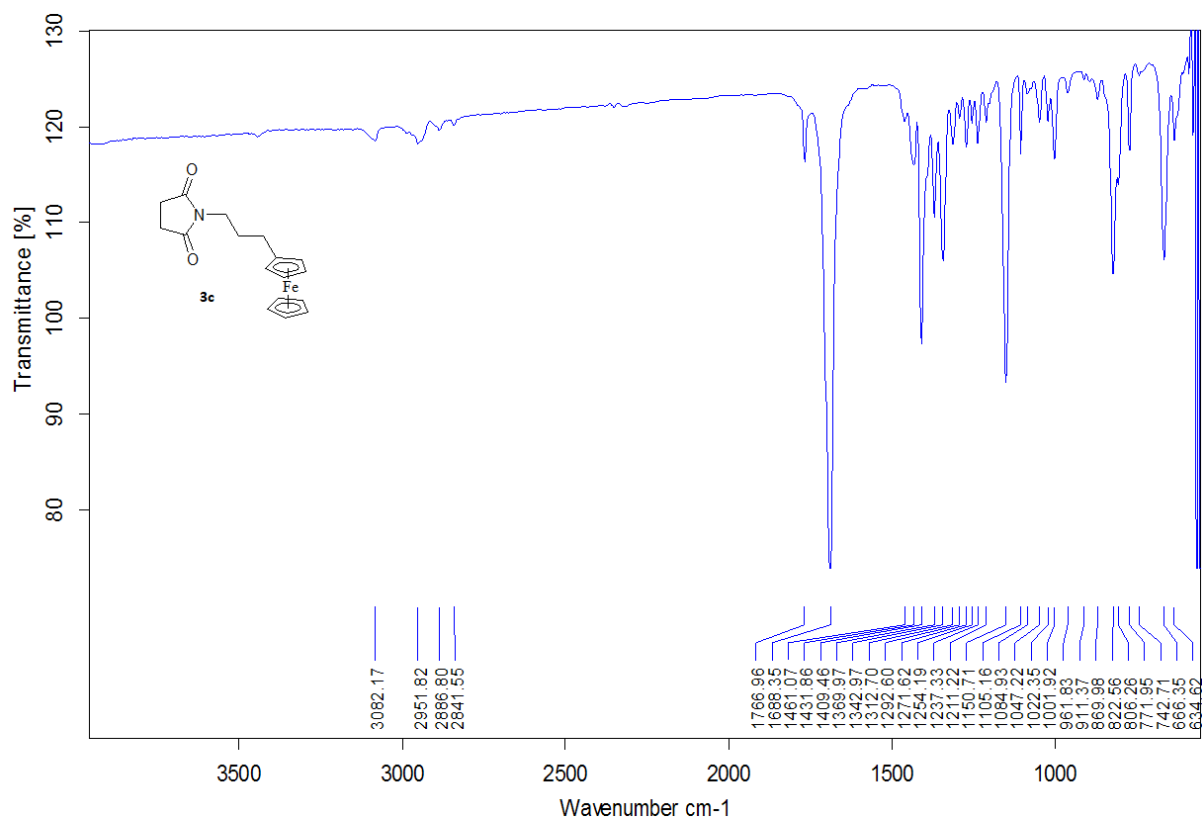

**Figure S4: HR-MS and IR data for compound 3d**

**Single Mass Analysis**

Tolerance = 5.0 PPM // DBE: min = -1.5, max = 100.0

Element prediction: Off

Number of isotope peaks used for i-FIT = 9

Monoisotopic Mass, Odd Electron Ions

339 formula(e) evaluated with 1 results within limits (all results (up to 1000) for each mass)

Elements Used:

C: 0-100 H: 1-120 N: 0-10 O: 0-10 Fe: 1-1

06-Sep-2013 5:00:0

ENSCP\_P731 21 (0.571) Cm (19:28)

MeOH

LCT Premier XE KE483

1: TOF MS ES+

4.26e+004

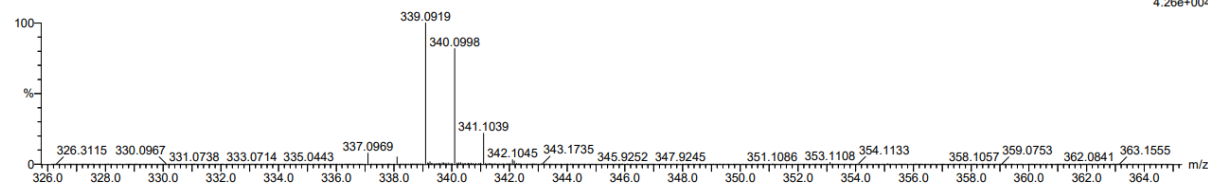

| Minimum: |            |      |      |       |        |              |                 |  |  |  |
|----------|------------|------|------|-------|--------|--------------|-----------------|--|--|--|
| Maximum: | 5.0        | 5.0  | -1.5 | 100.0 |        |              |                 |  |  |  |
| Mass     | Calc. Mass | mDa  | PPM  | DBE   | i-FIT  | i-FIT (Norm) | Formula         |  |  |  |
| 339.0919 | 339.0922   | -0.3 | -0.9 | 9.0   | 1253.4 | 0.0          | C18 H21 N O2 Fe |  |  |  |

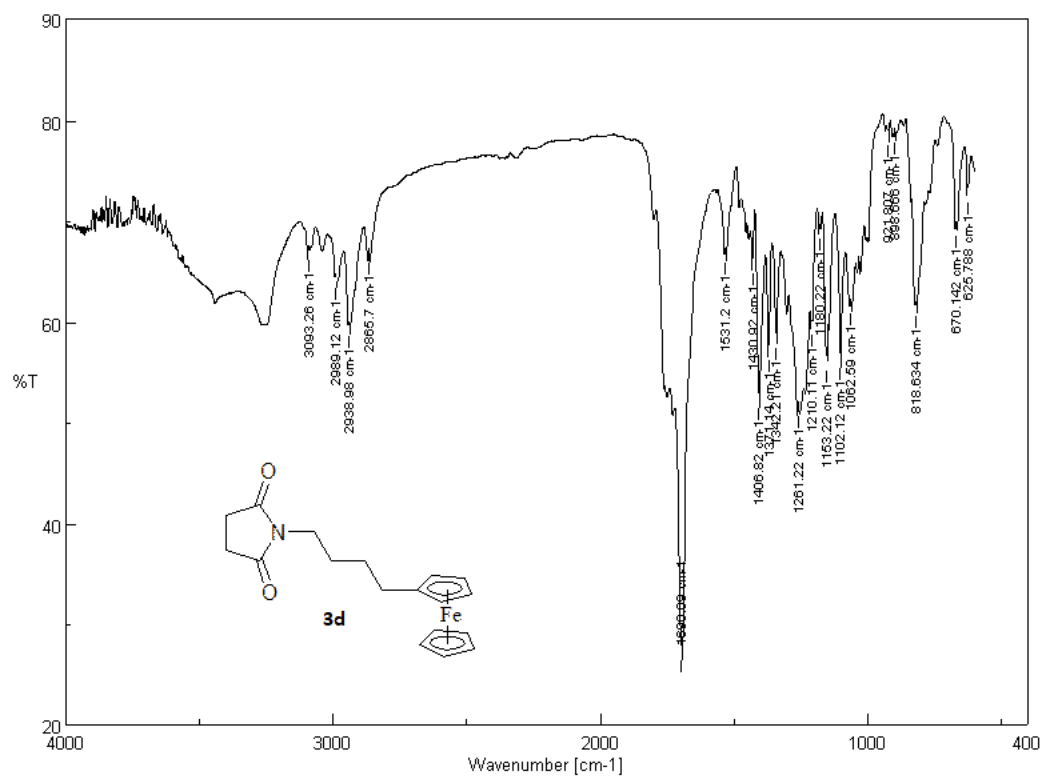

**Figure S5:**  $^1\text{H}$  (in  $\text{CDCl}_3$ ),  $^{13}\text{C}$  (in  $\text{CDCl}_3$ ) NMR and IR data for compound **3e**

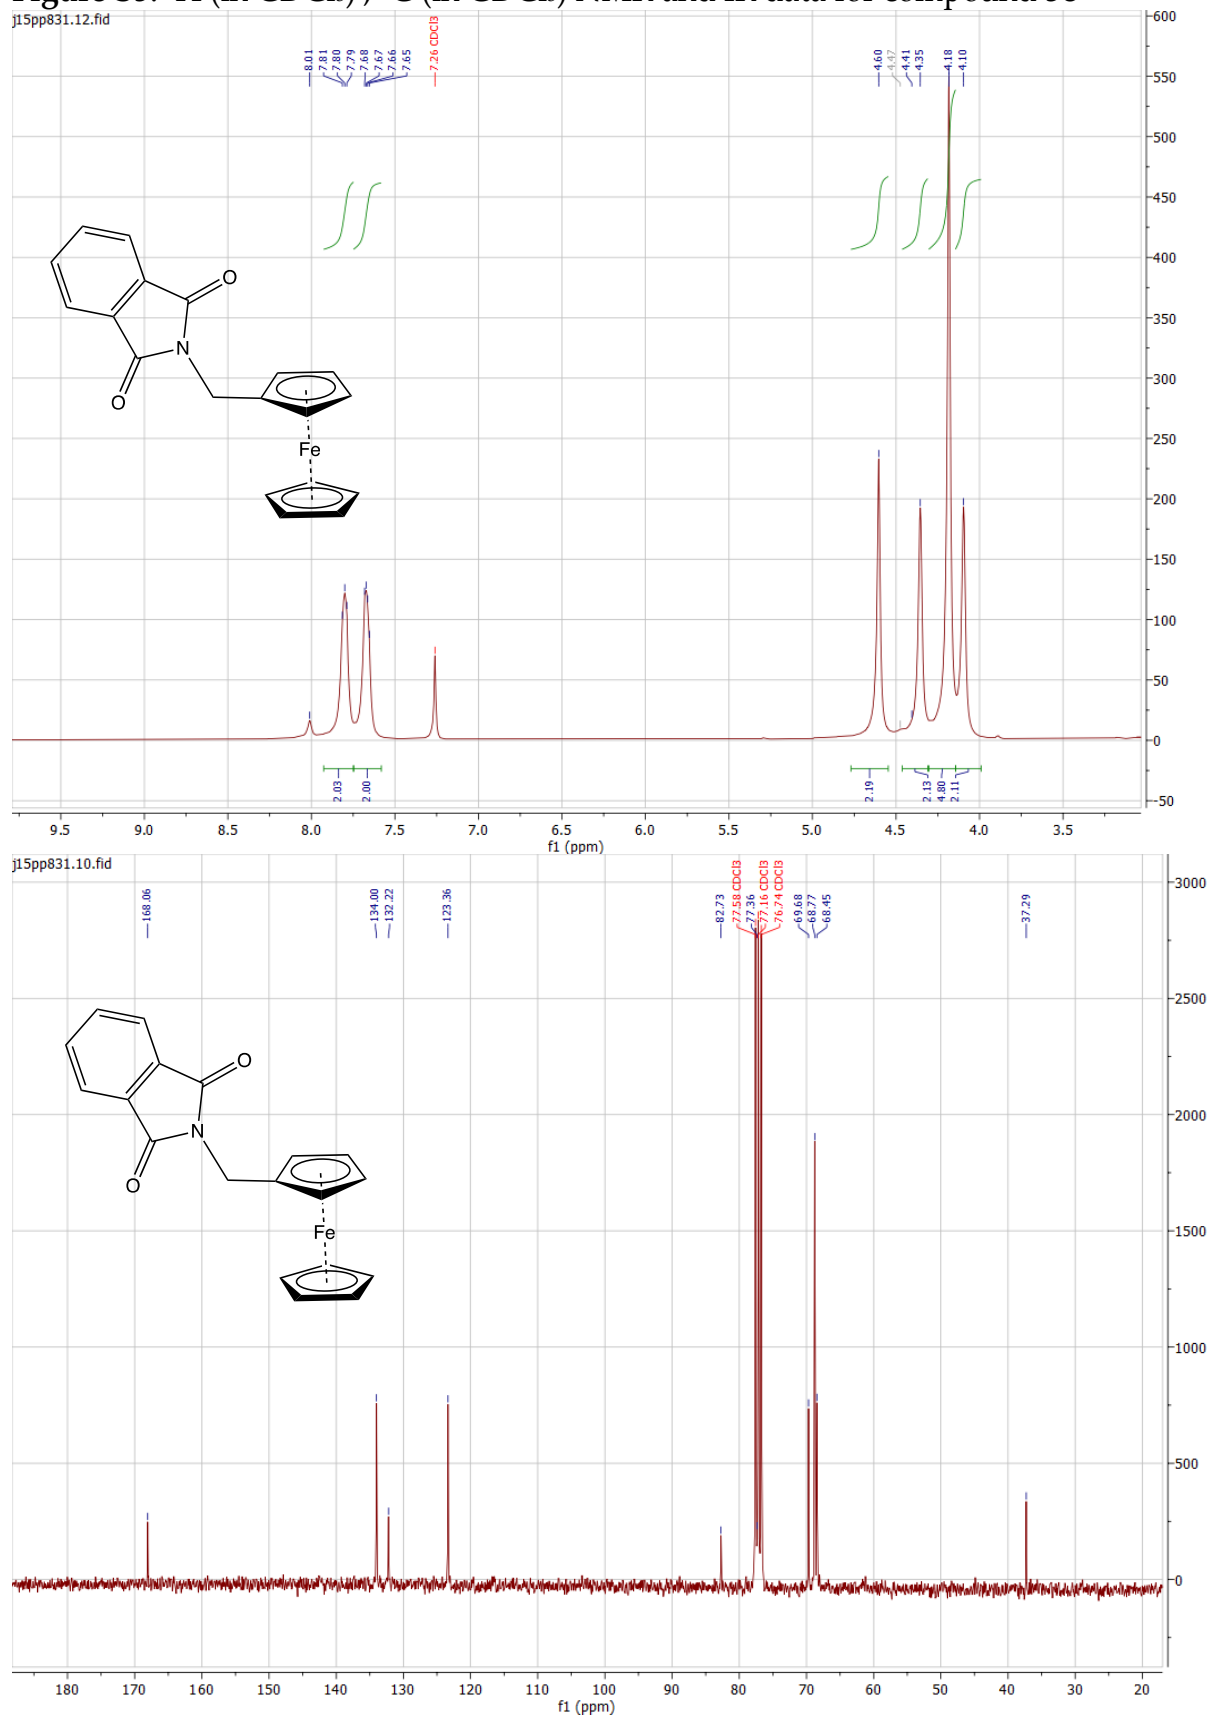

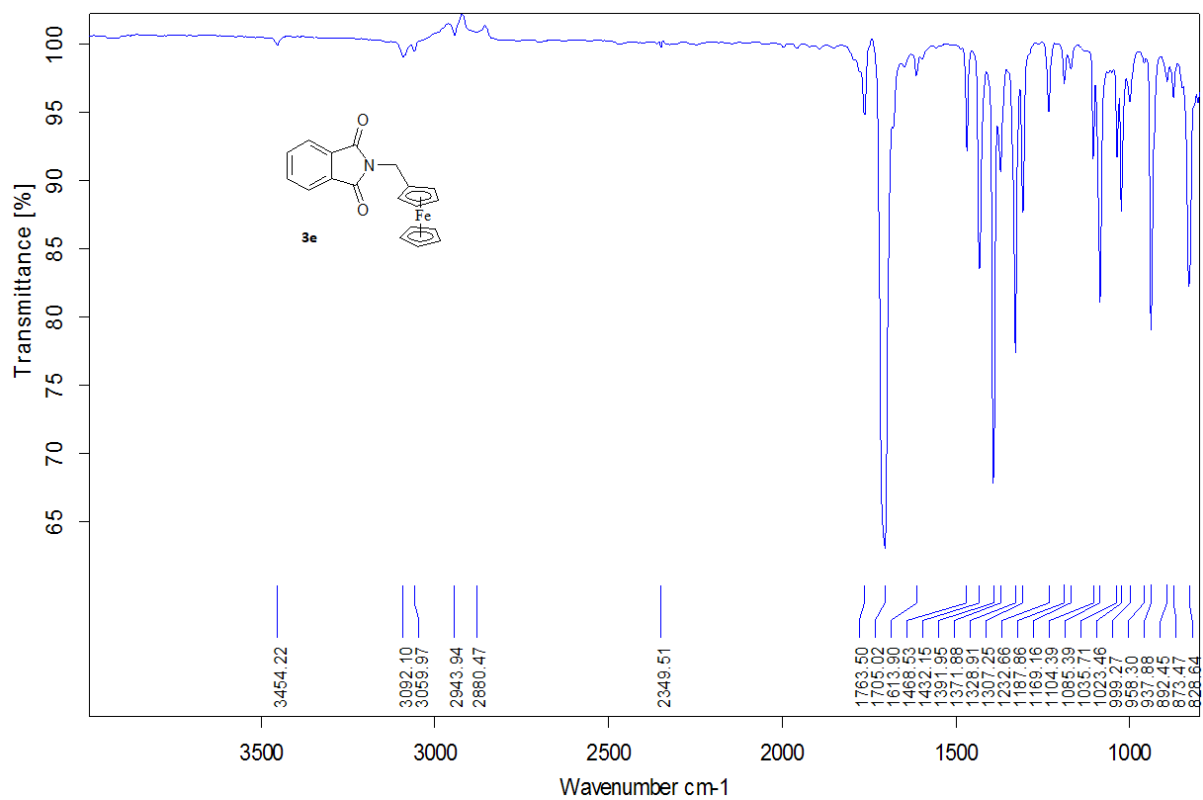



**Figure S6:**  $^1\text{H}$  (in  $\text{CDCl}_3$ ),  $^{13}\text{C}$  (in  $\text{CDCl}_3$ ) NMR HR-MS and IR for compound **3f**

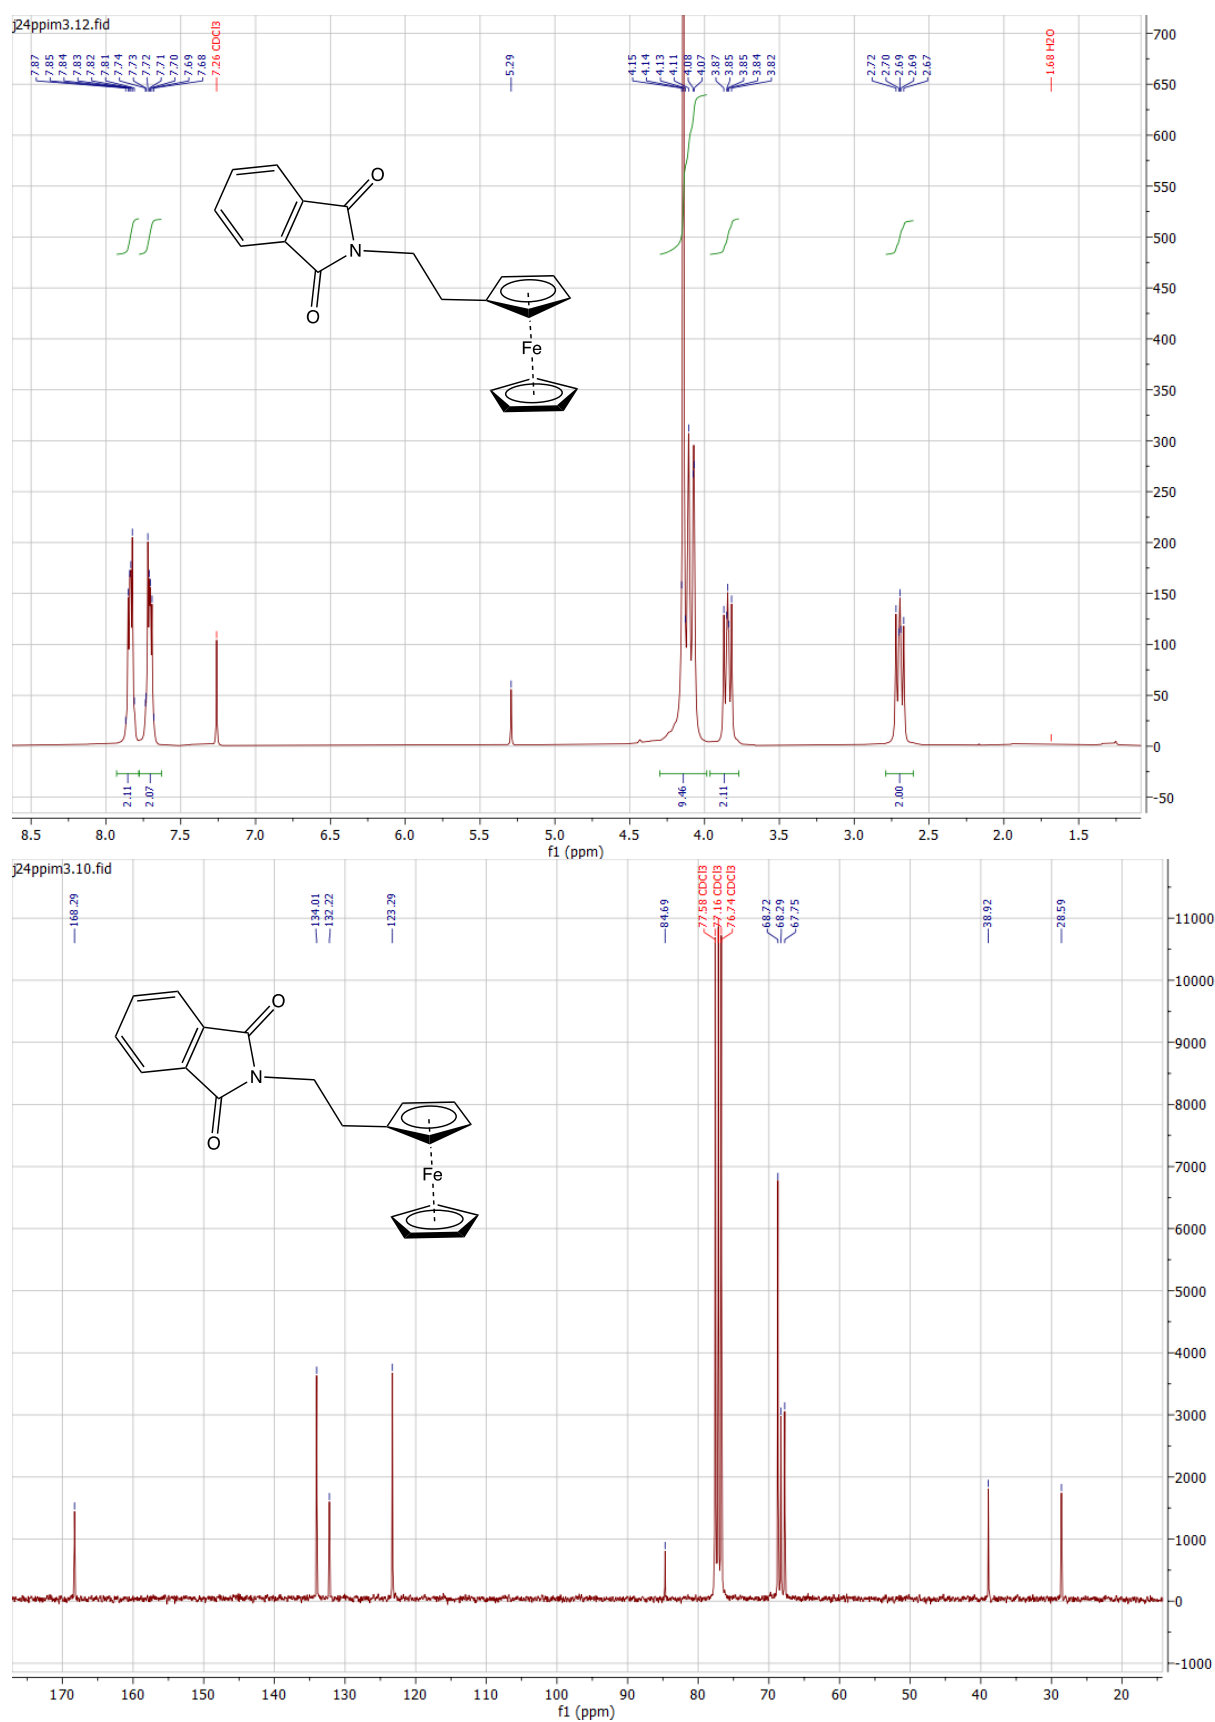

# Single Mass Analysis

Tolerance = 5.0 PPM // DBE: min = -1.5, max = 100.0

Element prediction: Off

Number of isotope peaks used for i-FIT = 9

Monoisotopic Mass, Odd Electron Ions

365 formula(e) evaluated with 2 results within limits (all results (up to 1000) for each mass)

Elements Used:

C: 0-100 H: 1-120 N: 0-10 O: 0-10 Fe: 1-1

06-Sep-2013 5:29:2

ENSCP\_P654 28 (0.714) Cm (28:39)

MeOH

LCT Premier XE KE483

1: TOF MS ES+

2.02e+004

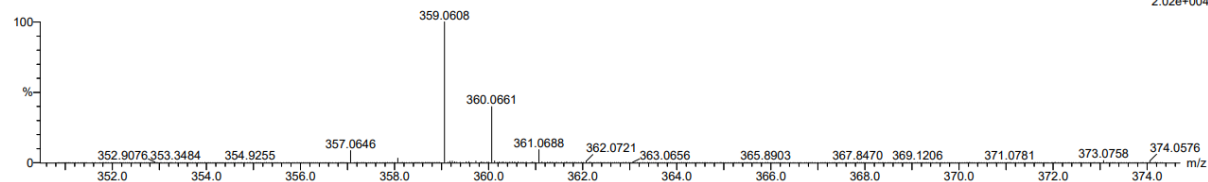

Minimum:

Maximum:

| Mass     | Calc. Mass | mDa  | PPM  | DBE  | i-FIT | i-FIT (Norm) | Formula         |
|----------|------------|------|------|------|-------|--------------|-----------------|
| 359.0608 | 359.0609   | -0.1 | -0.3 | 13.0 | 920.5 | 0.0          | C20 H17 N O2 Fe |
| 359.0608 | 359.0600   | 0.8  | 2.2  | 1.0  | 930.3 | 9.7          | C4 H17 N9 O7 Fe |

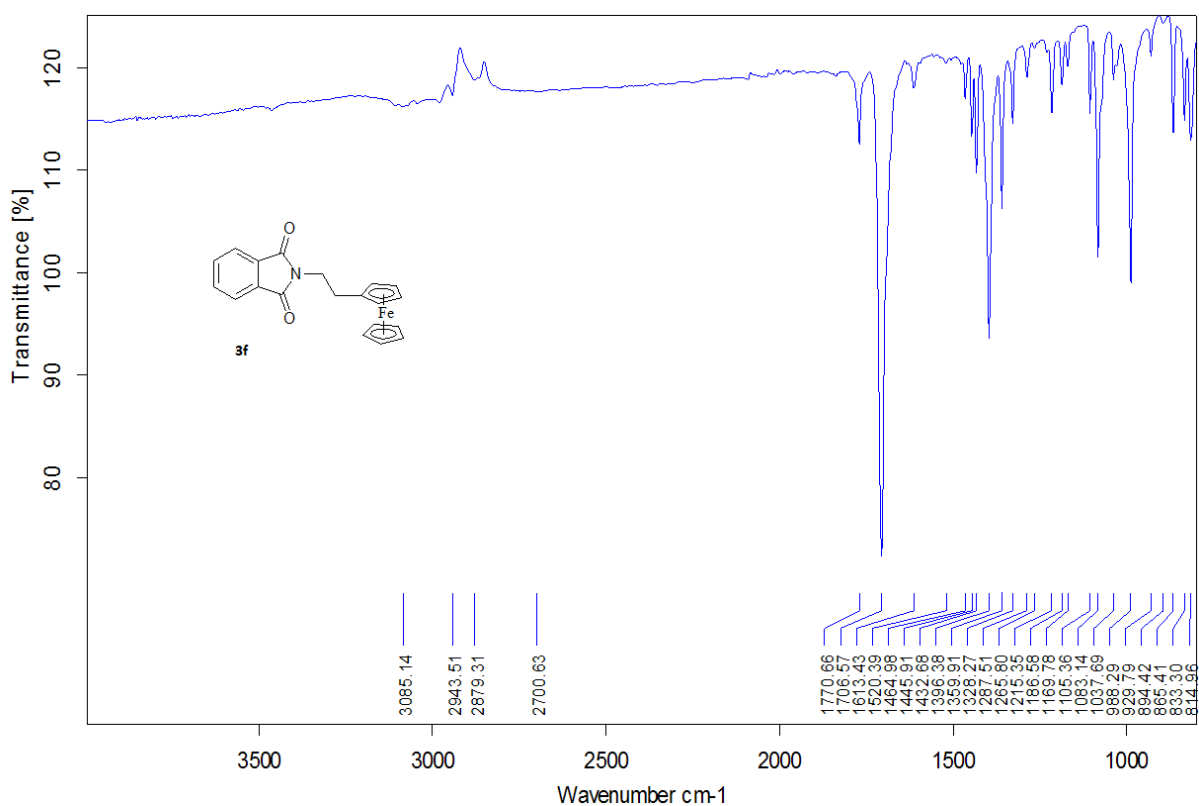

**Figure S7:**  $^1\text{H}$  (in  $\text{CDCl}_3$ ),  $^{13}\text{C}$  (in  $\text{CDCl}_3$ ) NMR, HR-MS and IR data for compound **3g**

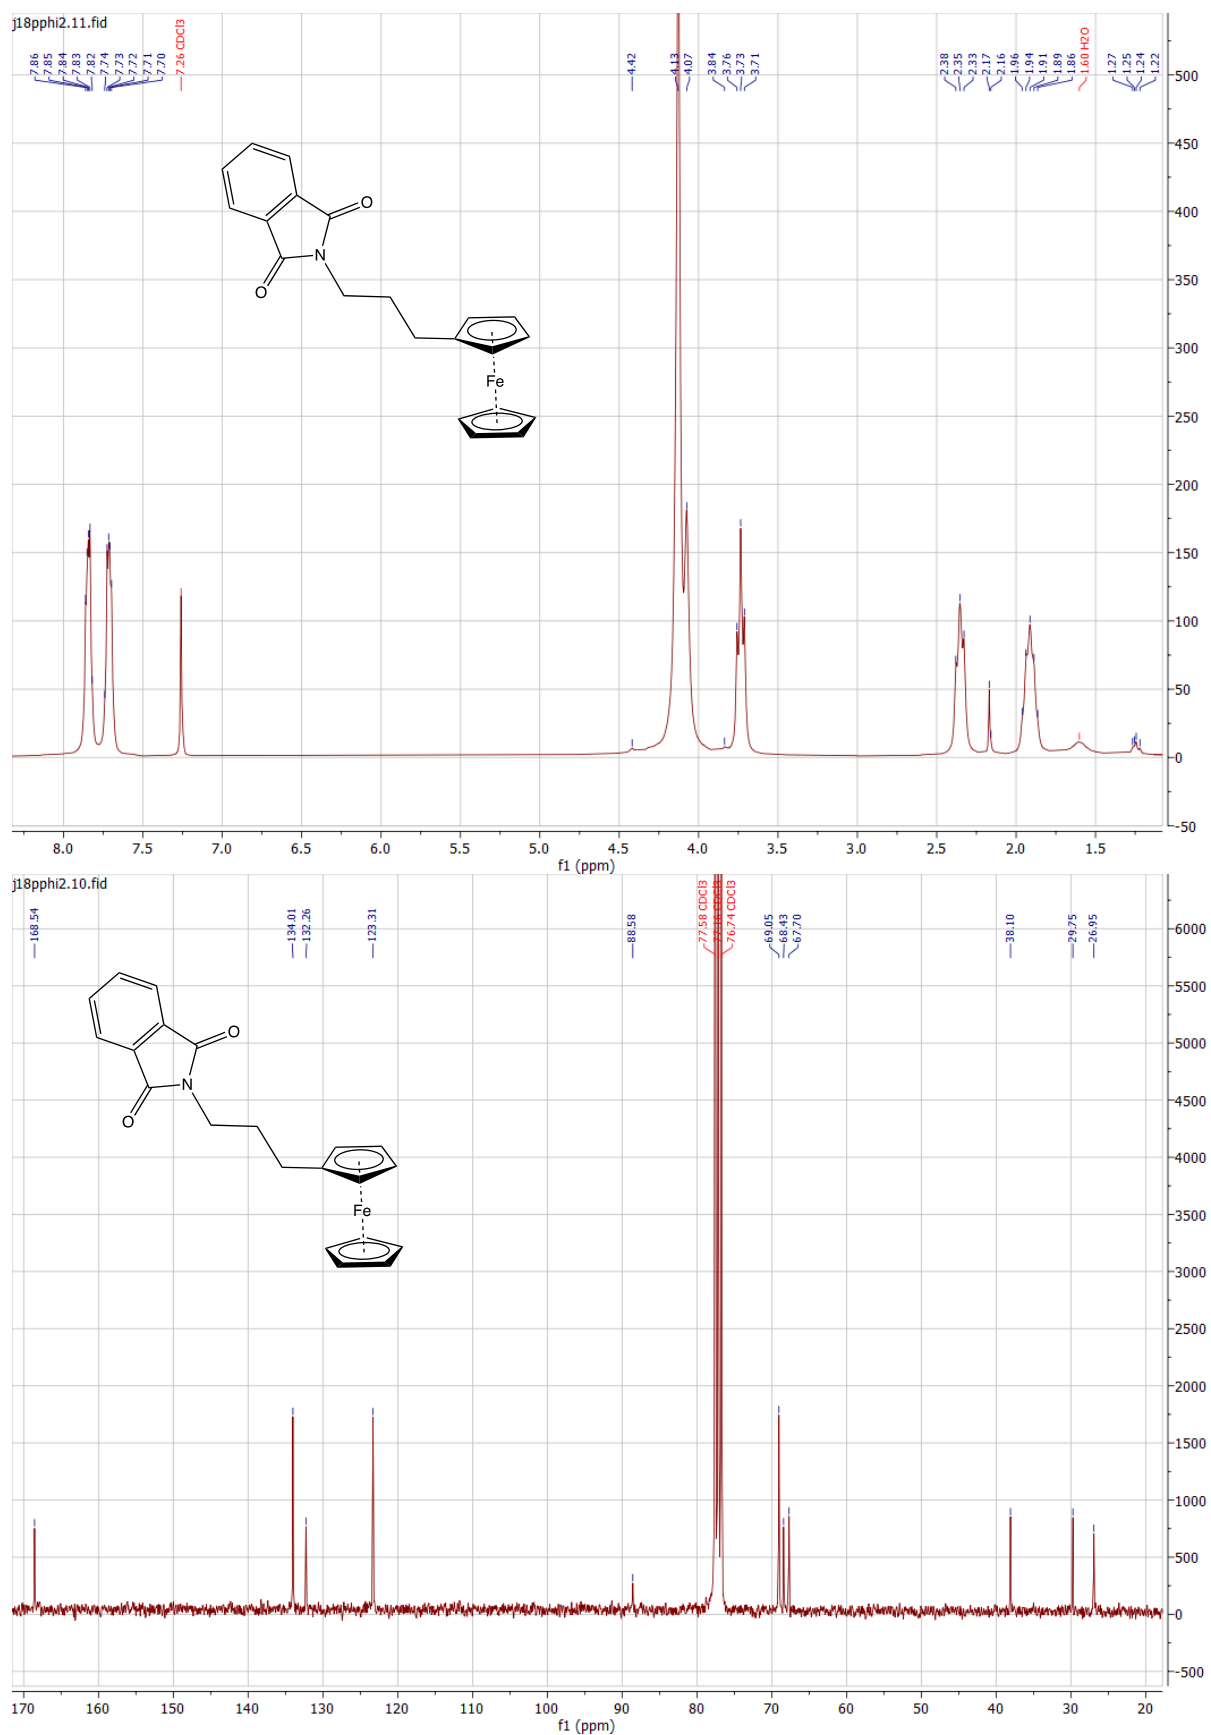

# Single Mass Analysis

Tolerance = 5.0 PPM / DBE: min = -1.5, max = 100.0

Element prediction: Off

Number of isotope peaks used for i-FIT = 9

Monoisotopic Mass, Odd Electron Ions

156 formula(e) evaluated with 2 results within limits (all results (up to 1000) for each mass)

Elements Used:

C: 1-150 H: 1-150 N: 0-3 O: 0-10 Fe: 1-1

19-Jun-2013 3:22:0

ENSCP\_P659 57 (1.384) Cm (55:60)

ACN

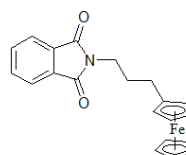

LCT Premier XE KE483  
1: TOF MS ES+  
1.96e+003

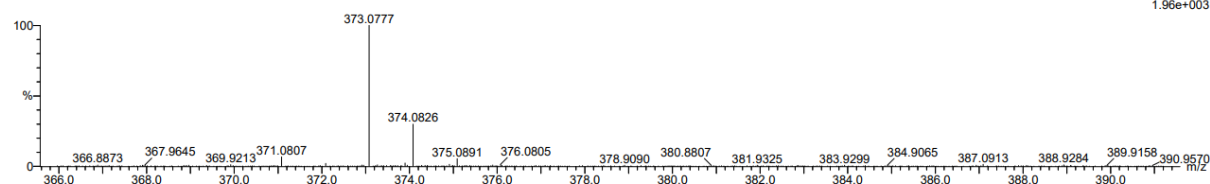

Minimum:

Maximum:

Mass Calc. Mass mDa PPM DBE i-FIT i-FIT (Norm) Formula

| Mass     | Calc. Mass | mDa  | PPM  | DBE  | i-FIT | i-FIT (Norm) | Formula         |
|----------|------------|------|------|------|-------|--------------|-----------------|
| 373.0777 | 373.0765   | 1.2  | 3.2  | 13.0 | 457.1 | 0.0          | C21 H19 N O2 Fe |
|          | 373.0784   | -0.7 | -1.9 | 0.0  | 463.7 | 6.6          | C9 H23 N3 O9 Fe |

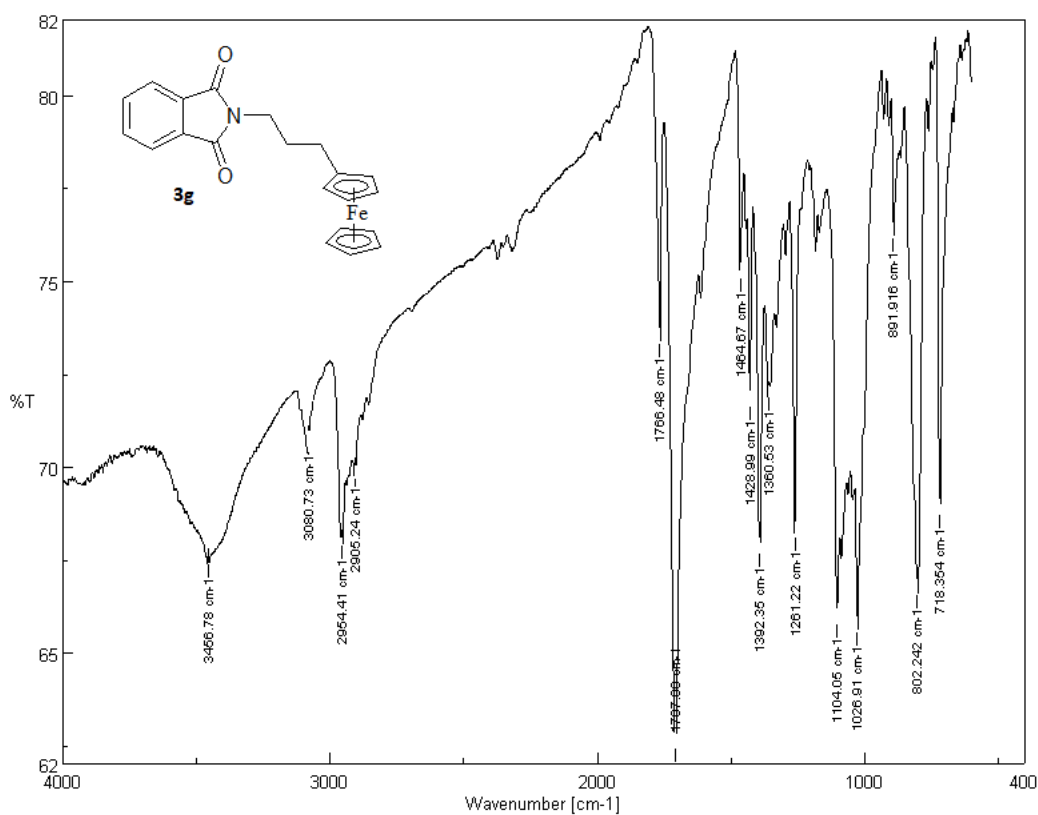

**Figure S8:**  $^1\text{H}$  (in acetone- $d_6$ ),  $^{13}\text{C}$  (in  $\text{CDCl}_3$ ) NMR, HR-MS and IR data for compound **3h**

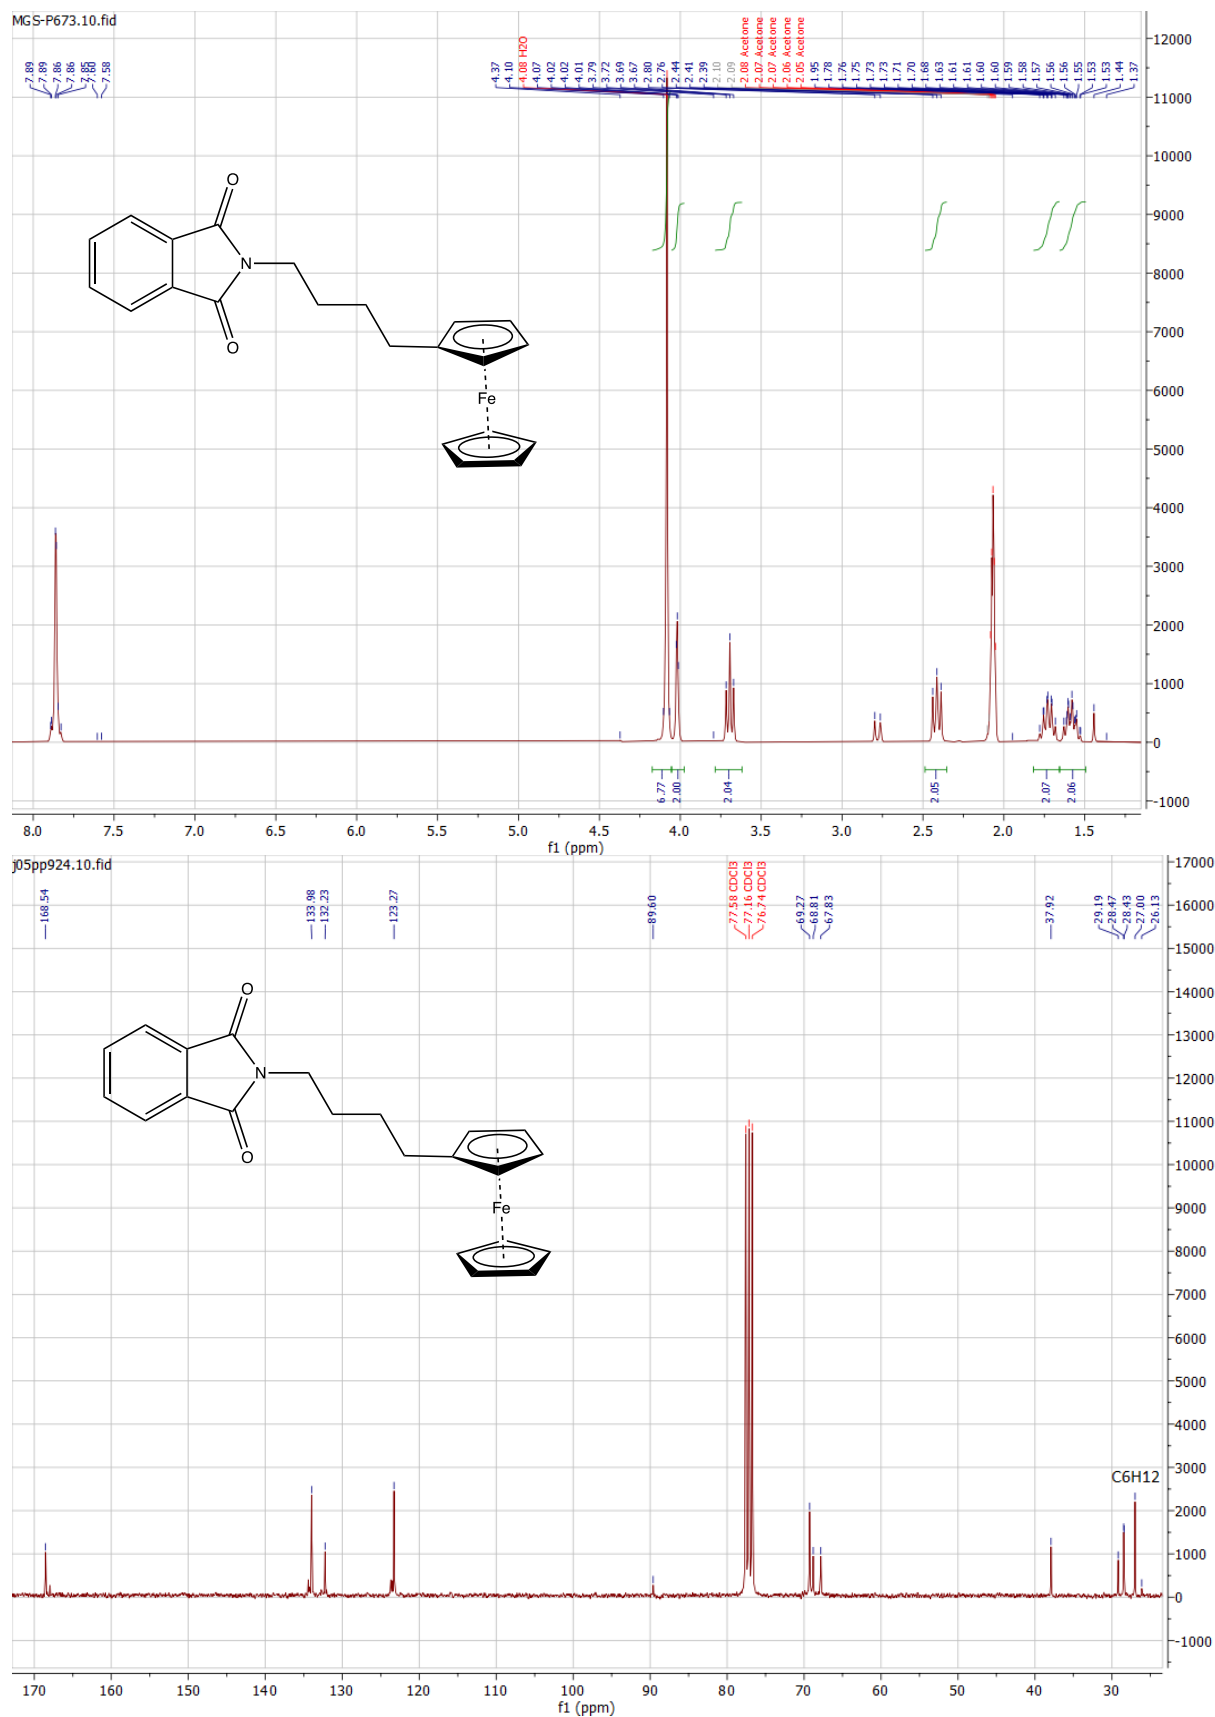

Tolerance = 5.0 PPM / DBE: min = -1.5, max = 100.0  
Element prediction: Off  
Number of isotope peaks used for i-FIT = 9

Monoisotopic Mass, Odd Electron Ions  
 164 formula(e) evaluated with 1 results within limits (all results (up to 1000) for each mass)  
 Elements Used:  
 C: 1-150 H: 1-150 N: 0-3 O: 0-10 Fe: 1-1  
 19-Jun-2013 2:4:4  
 ENSCP\_P673 49 (1.204) Cm (47.54)

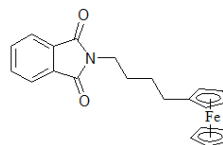

ACN

LCT Premier XE KE483  
1: TOF MS ES+  
1.84e+004

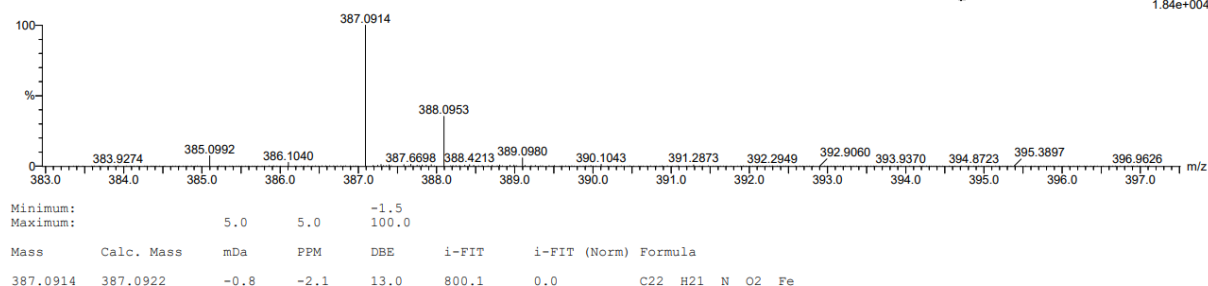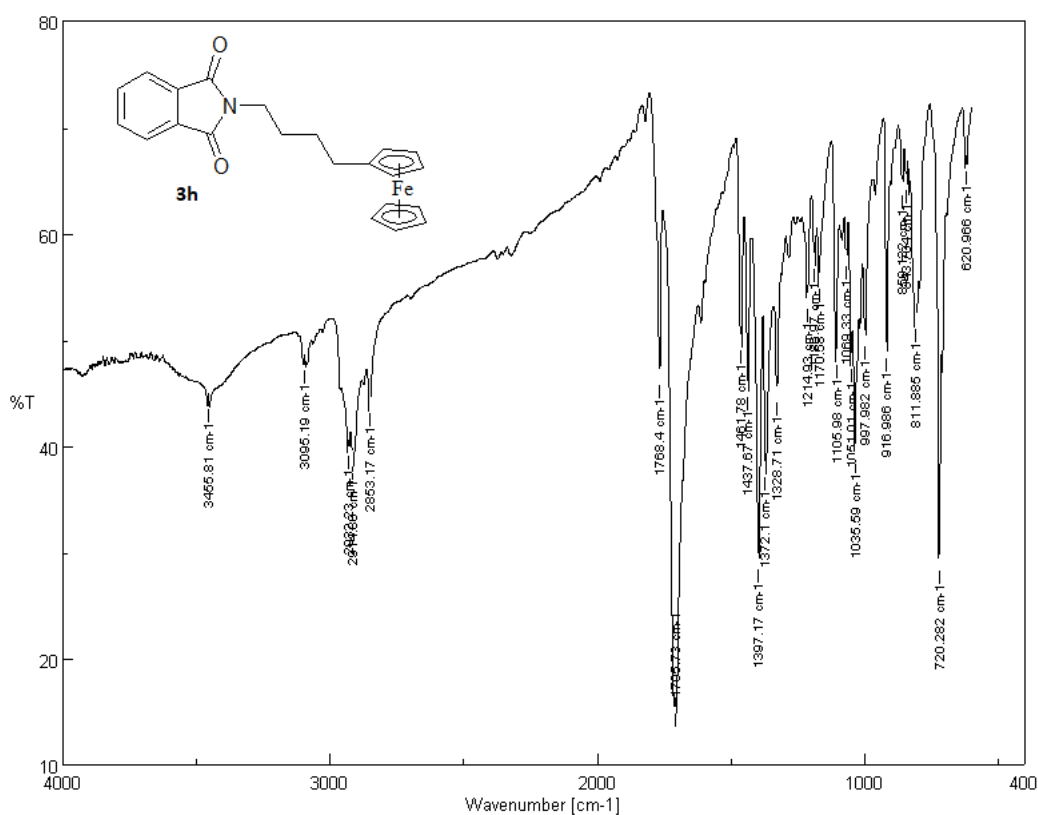

**Figure S9:**  $^1\text{H}$  (in  $\text{CDCl}_3$ ),  $^{13}\text{C}$  (in  $\text{DMSO-d}_6$ ) NMR, HR-MS and IR data for compound **3i**

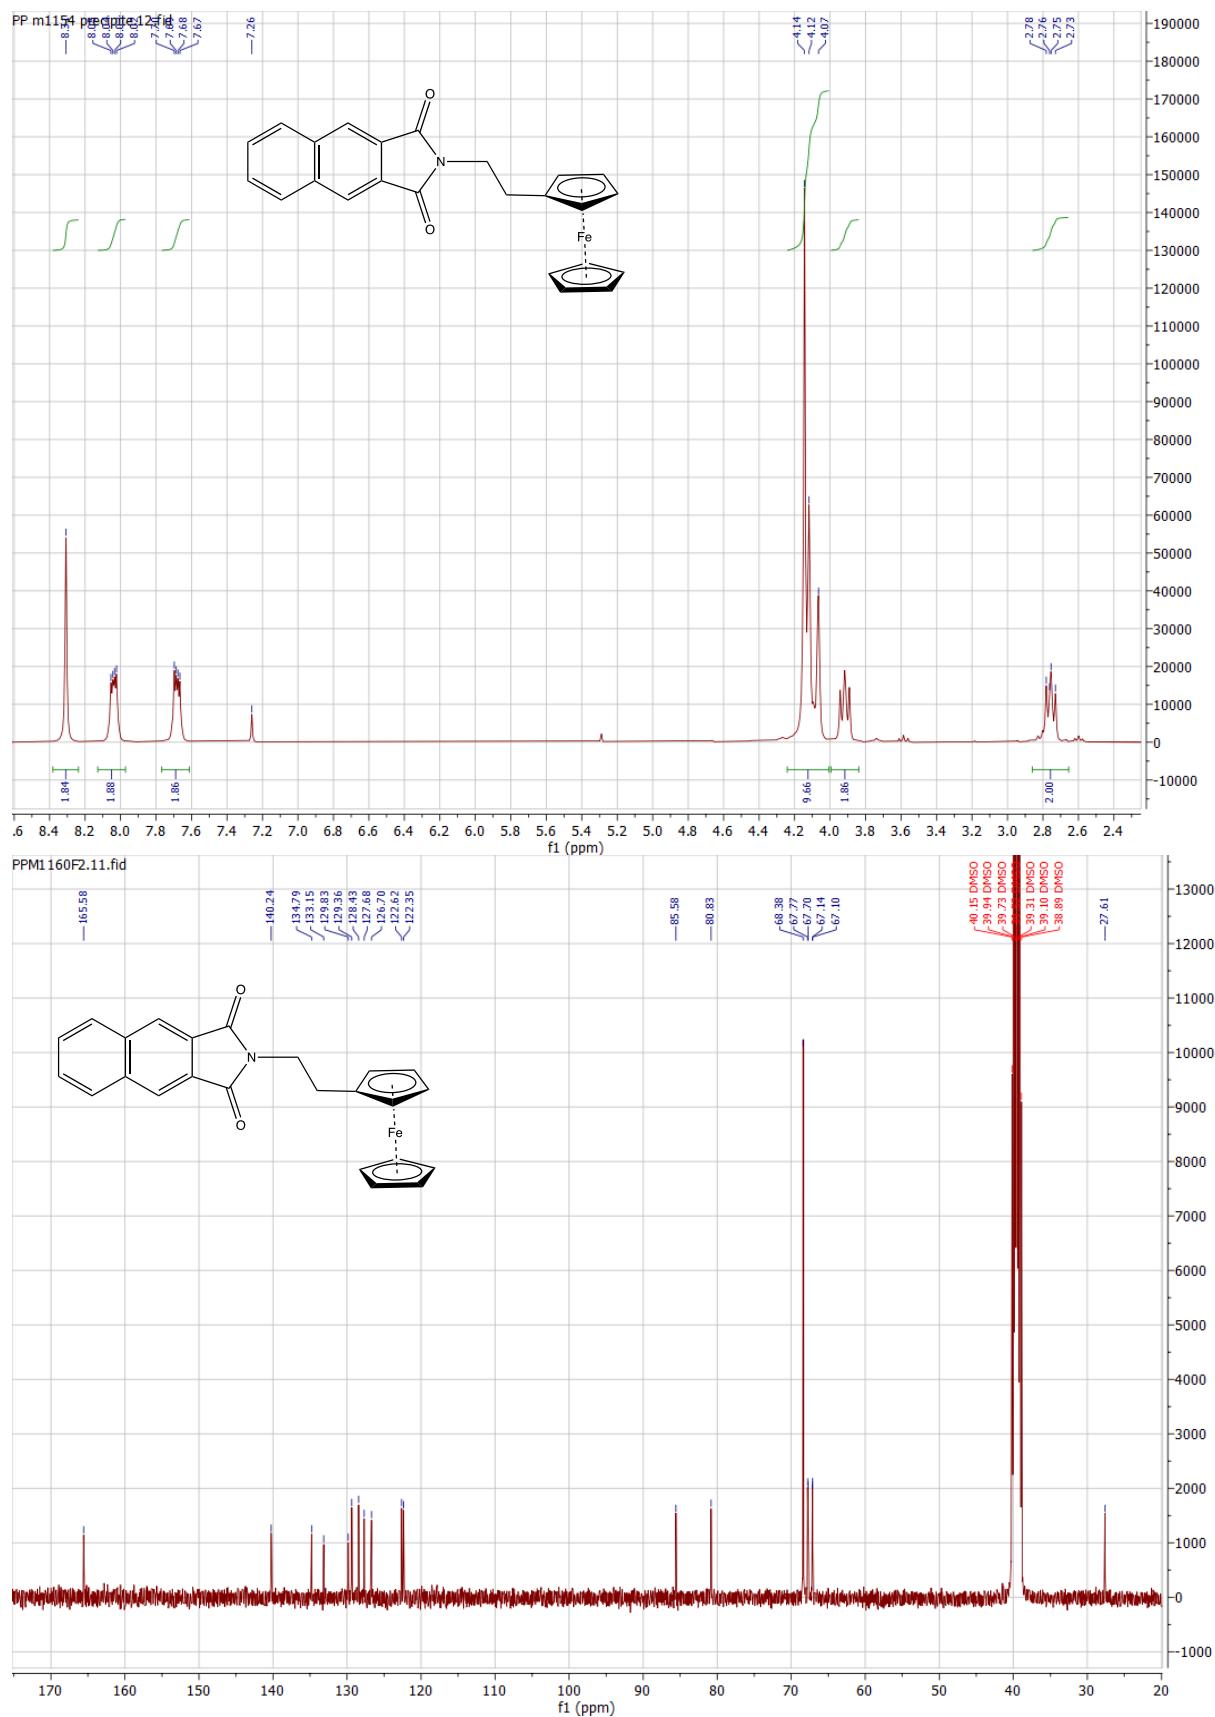

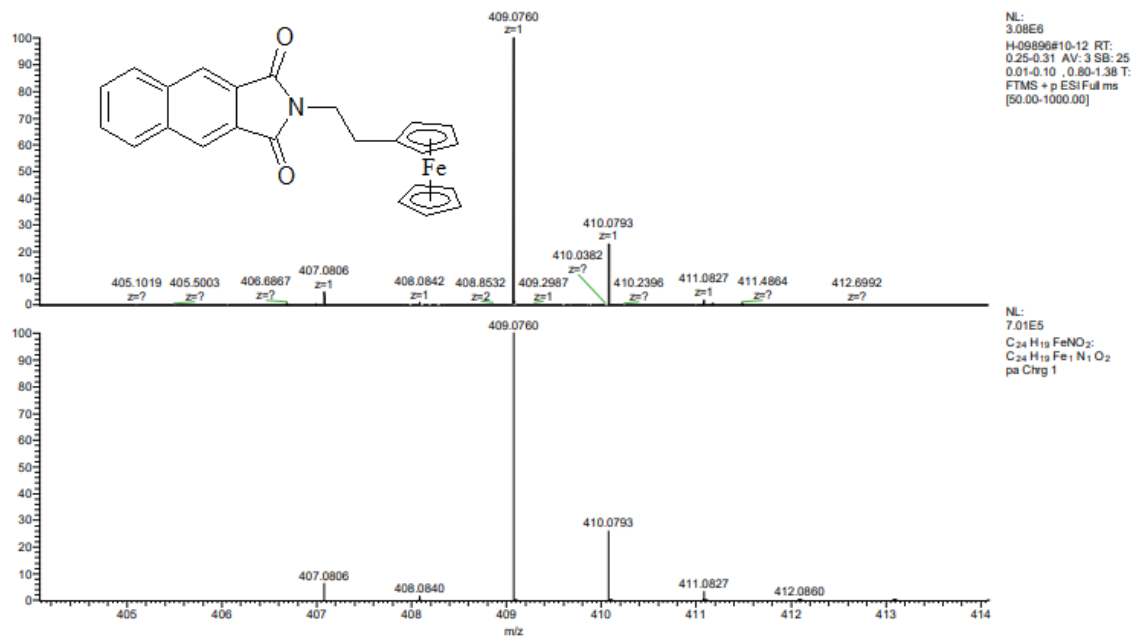

## Experimental/theoretical isotopic pattern MS spectrum

Error = 0.1 ppm; Relative Intensity (%) 100

HRMS (ESI) m/z: [M]<sup>+</sup> Calcd for C<sub>24</sub>H<sub>19</sub>FeNO<sub>2</sub> 409.0760 . Found 409.076; (Error: 0.1 ppm).

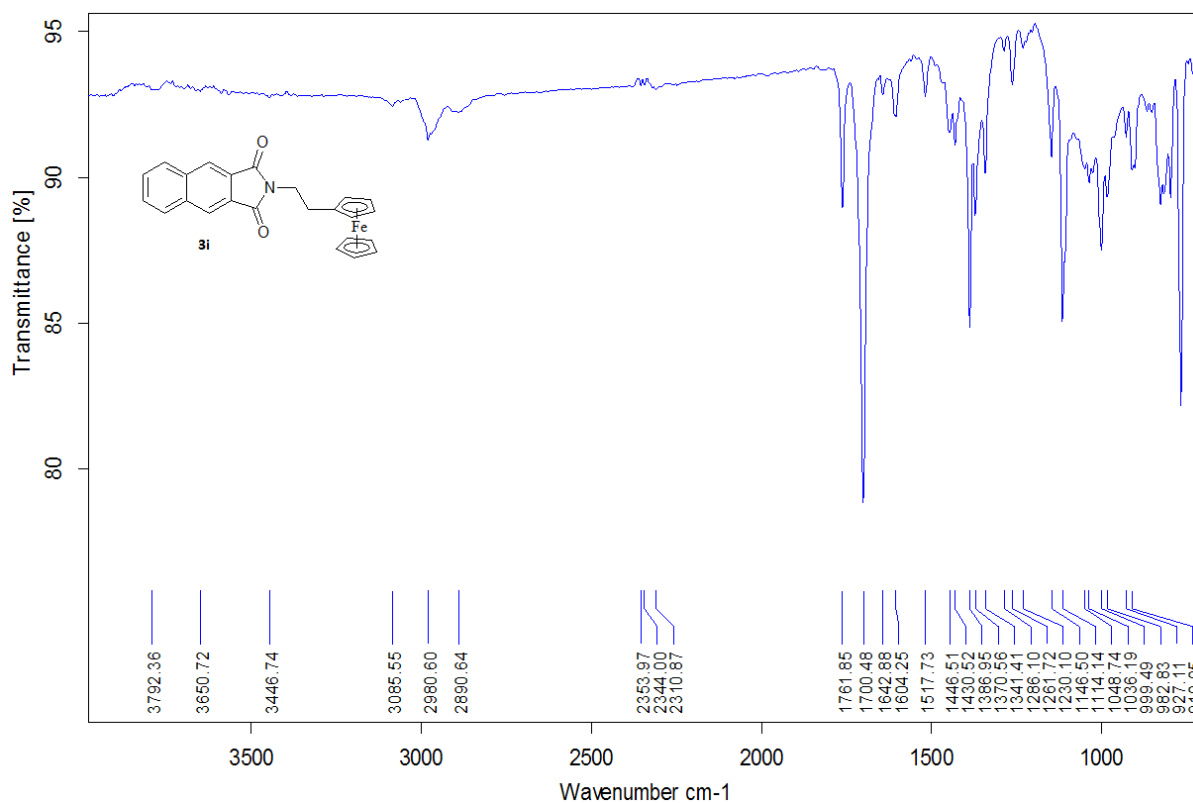



**Figure S10:**  $^1\text{H}$  (in  $\text{CDCl}_3$ ),  $^{13}\text{C}$  (in  $\text{CDCl}_3$ ) NMR, HR-MS and IR data for compound **3j**

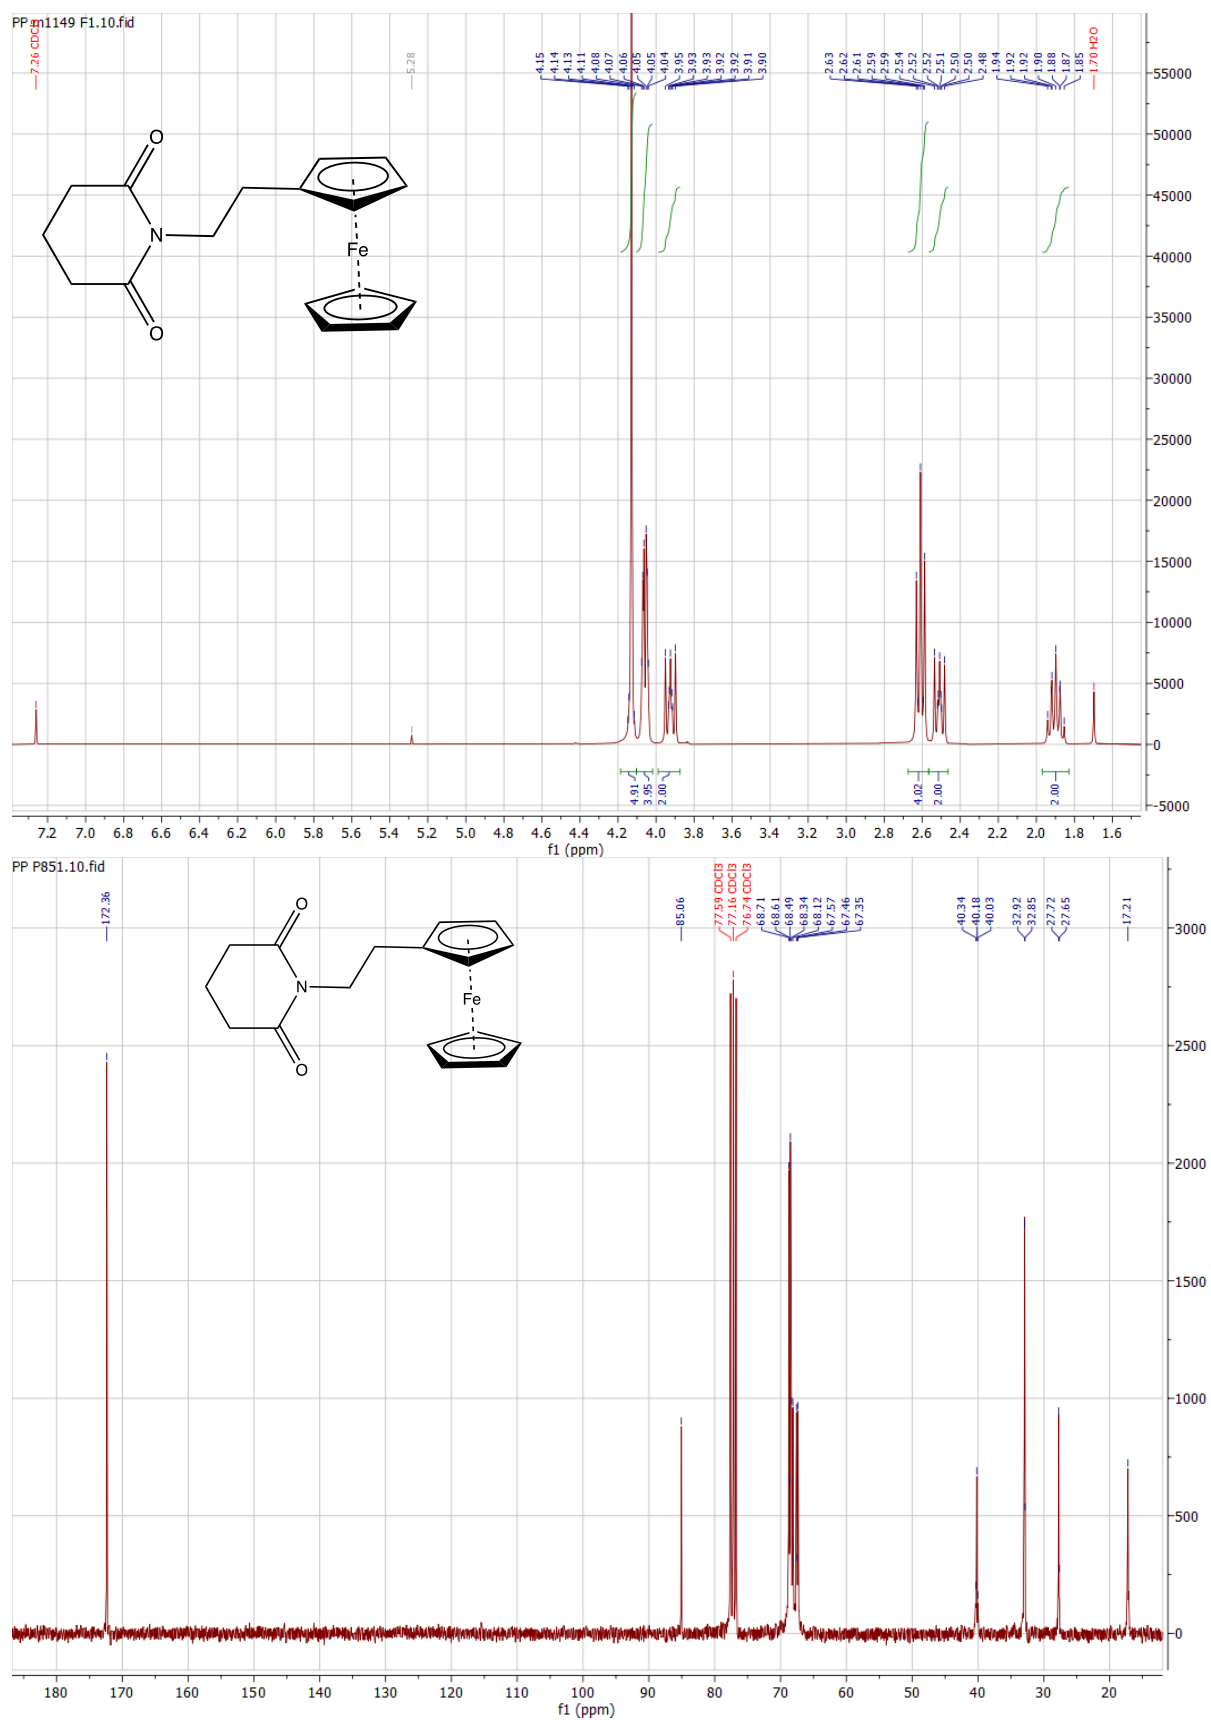

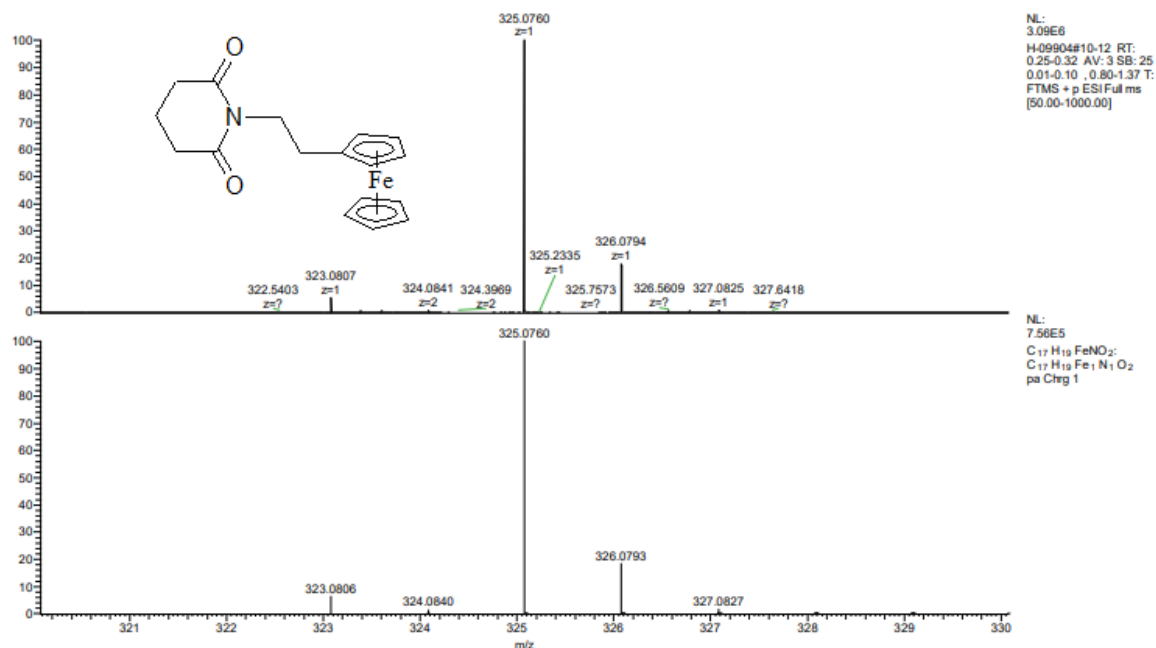

## Experimental/theoretical isotopic pattern MS spectrum

Error = 0.1 ppm; Relative Intensity (%) 100

HRMS (ESI) m/z: [M]<sup>+</sup> Calcd for C<sub>17</sub>H<sub>19</sub>FeNO<sub>2</sub> 325.0760 . Found 325.076; (Error: 0.1 ppm).

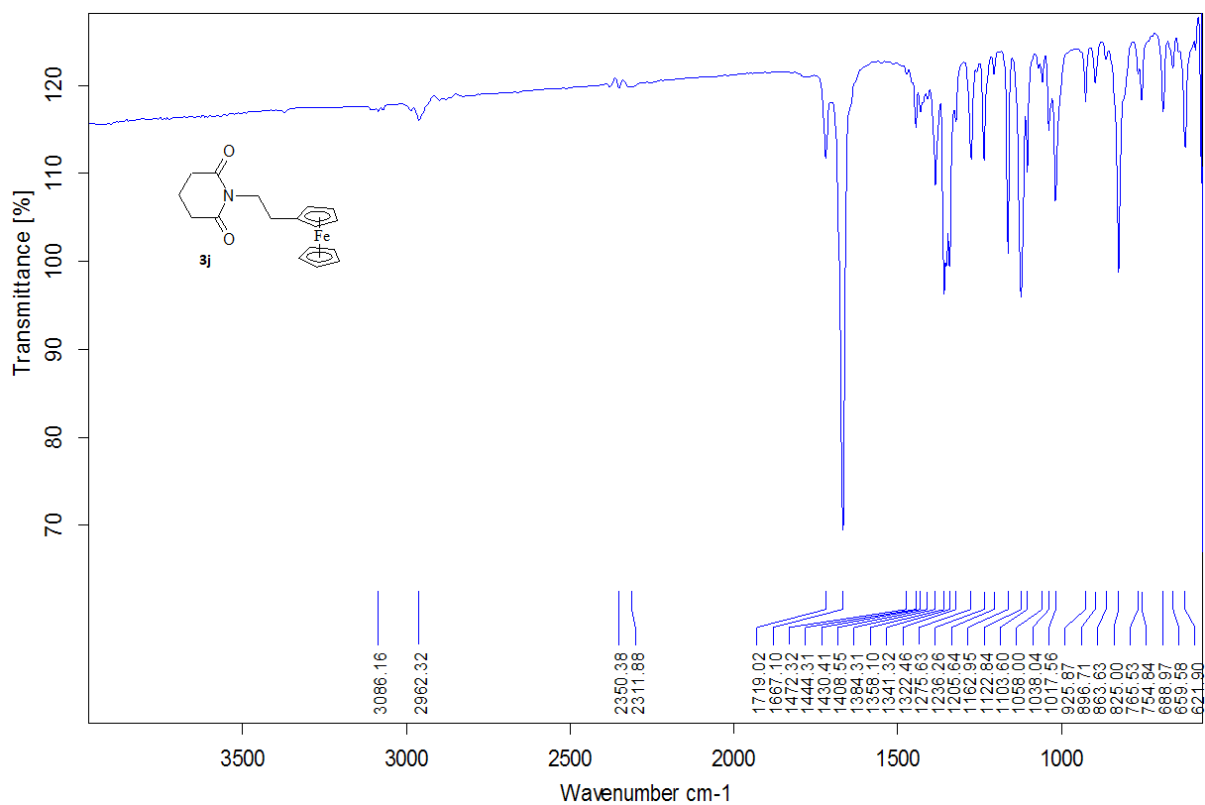

**Figure S11:**  $^1\text{H}$  (in  $\text{CDCl}_3$ ),  $^{13}\text{C}$  (in  $\text{CDCl}_3$ ) NMR, HR-MS and IR data for compound **3k**

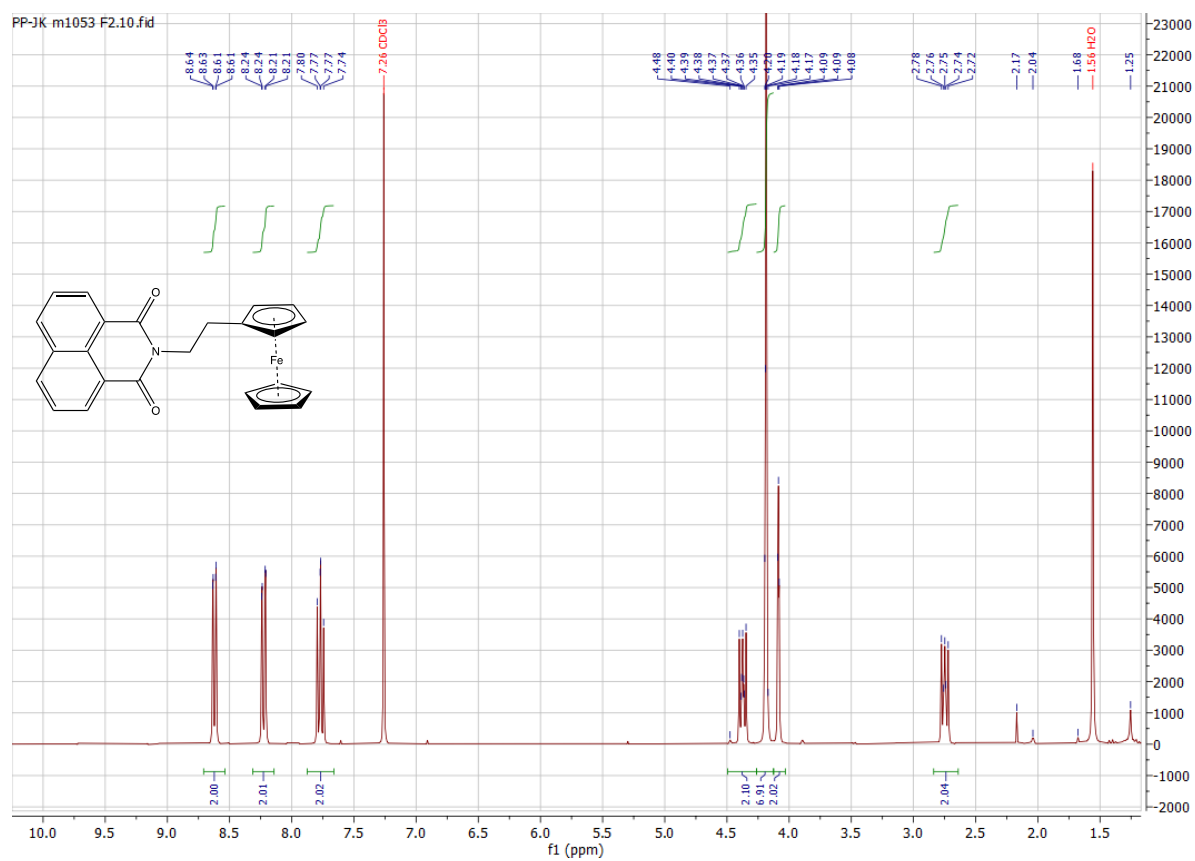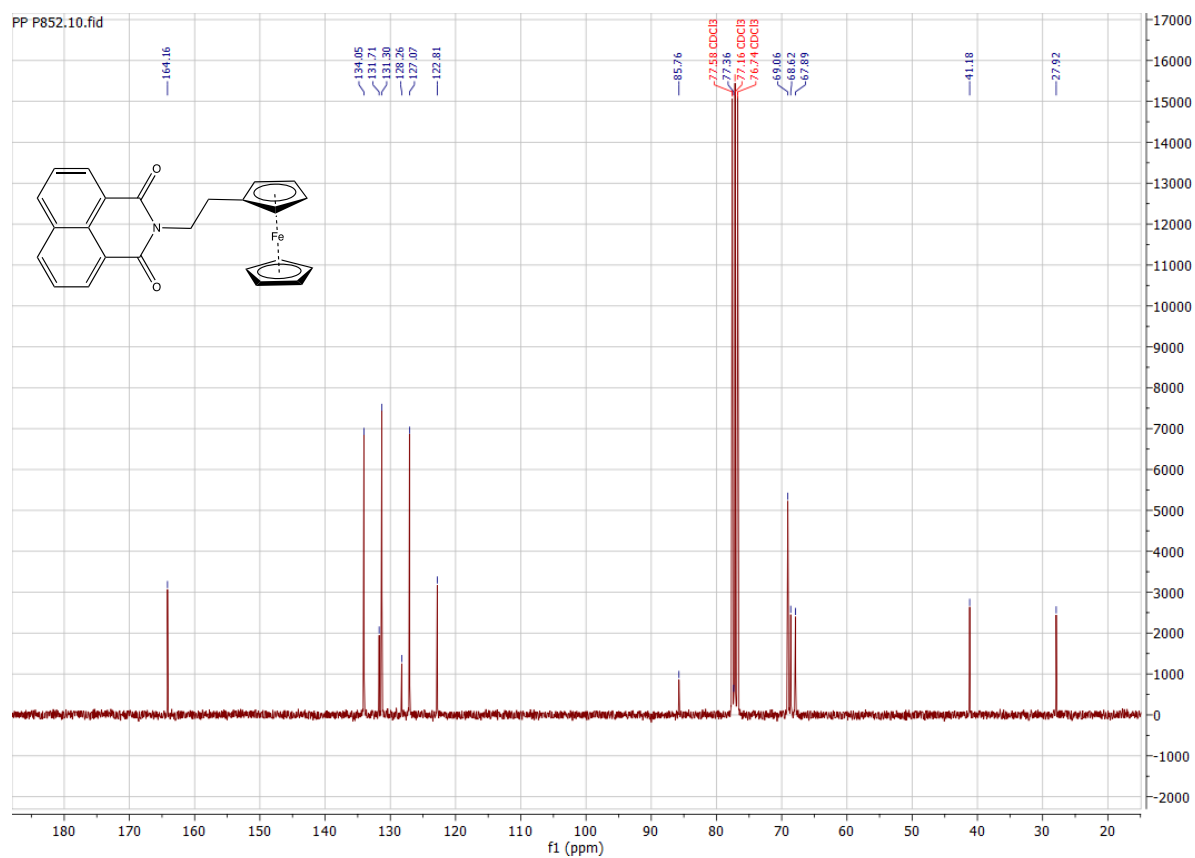

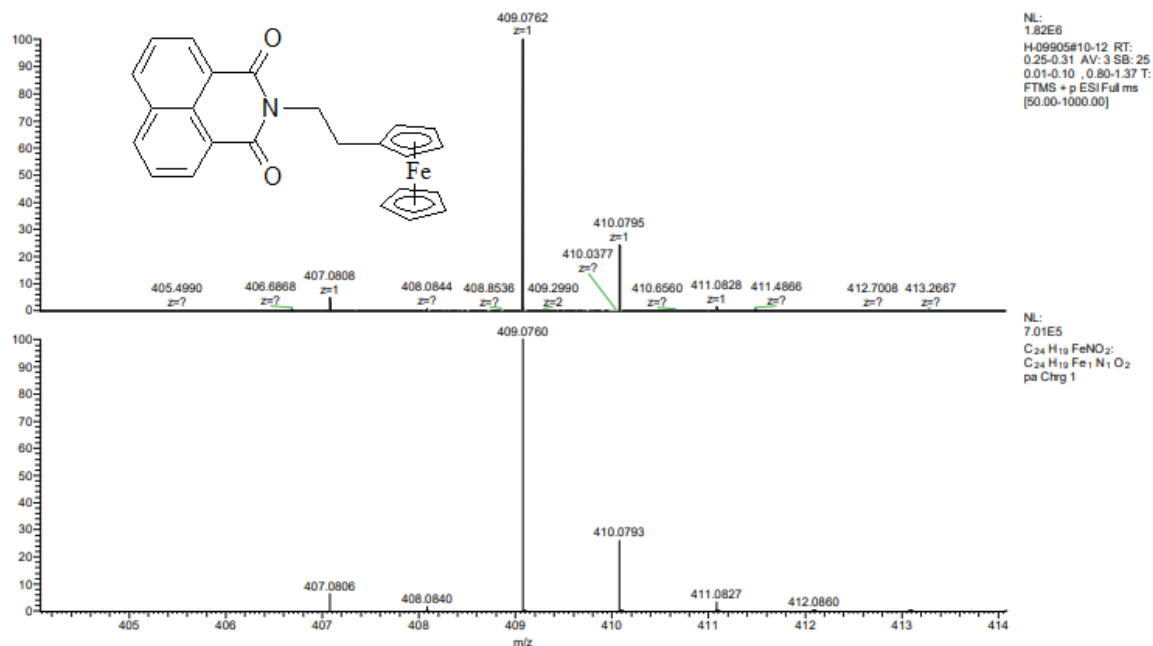

## Experimental/theoretical isotopic pattern MS spectrum

Error = 0.6 ppm; Relative Intensity (%) 100

HRMS (ESI) m/z: [M]<sup>+</sup> Calcd for C<sub>24</sub>H<sub>19</sub>FeNO<sub>2</sub> 409.0760 . Found 409.0762; (Error: 0.6 ppm).

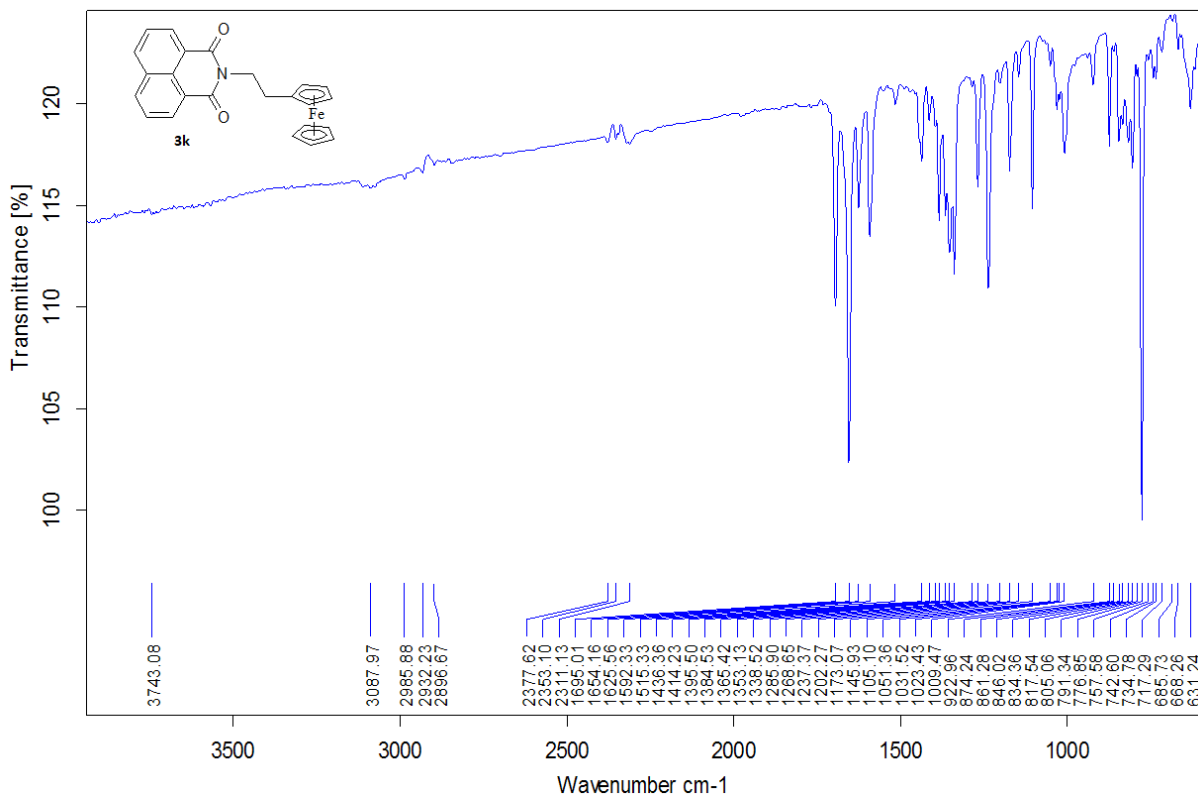

**Figure S12:**  $^1\text{H}$  (in  $\text{CDCl}_3$ ),  $^{13}\text{C}$  (in  $\text{CDCl}_3$ ) NMR, HR-MS and IR data for compound **4b**

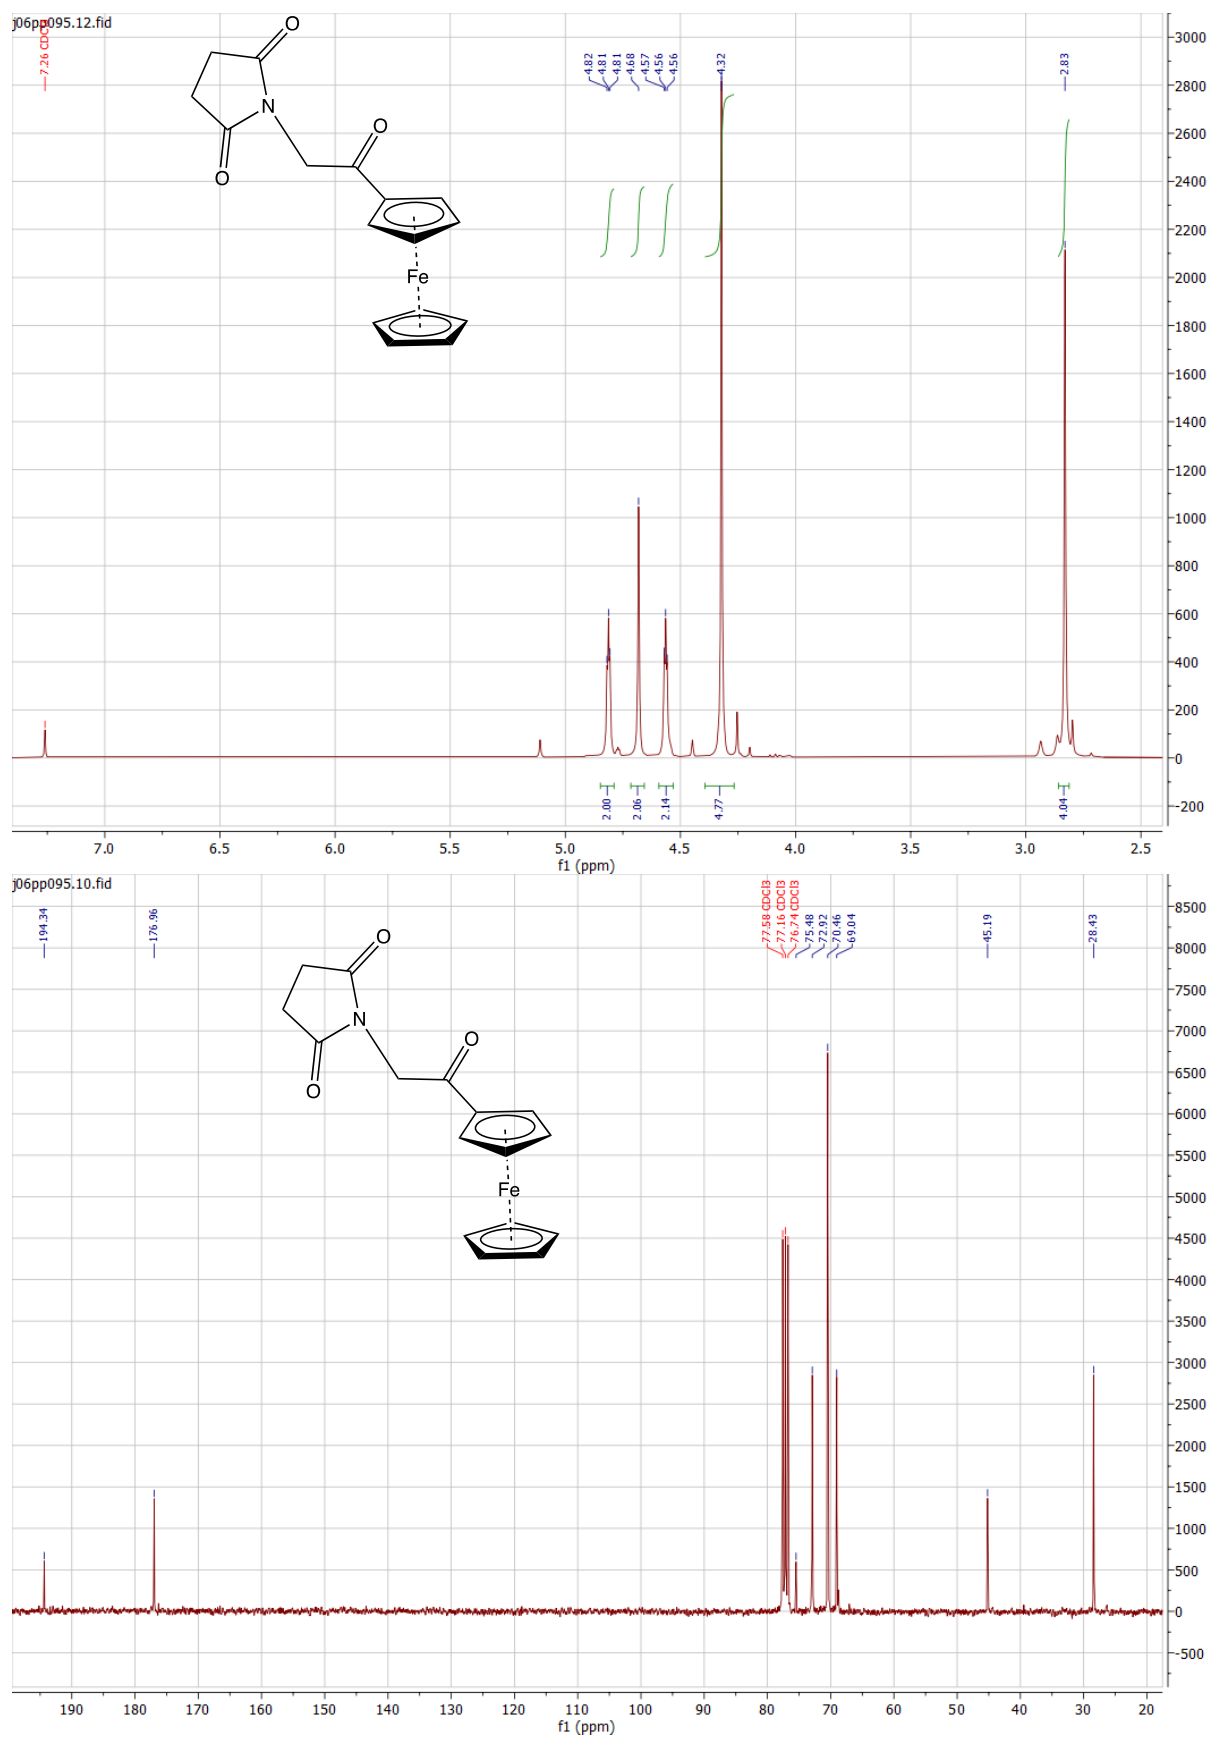

# Single Mass Analysis

Tolerance = 5.0 PPM / DBE: min = -1.5, max = 100.0

Element prediction: Off

Number of isotope peaks used for i-FIT = 9

Monoisotopic Mass, Even Electron Ions

310 formula(e) evaluated with 2 results within limits (all results (up to 1000) for each mass)

Elements Used:

C: 0-100 H: 1-120 N: 0-10 O: 0-10 Fe: 1-1

06-Sep-2013 5:11:7

ENSCP\_P737 26 (0.681) Cm (26.32)

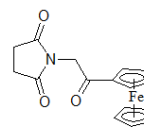

MeOH

LCT Premier XE KE483  
1: TOF MS ES+  
1.44e+004

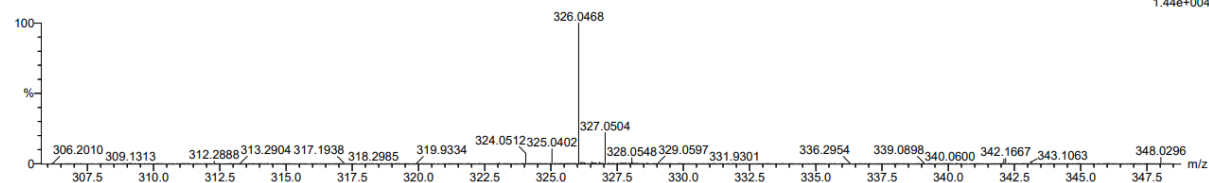

Minimum:

Maximum:

| Mass     | Calc. Mass | mDa  | PPM  | DBE  | i-FIT | i-FIT (Norm) | Formula         |
|----------|------------|------|------|------|-------|--------------|-----------------|
| 326.0468 | 326.0480   | -1.2 | -3.7 | 9.5  | 763.4 | 0.0          | C16 H16 N O3 Fe |
|          | 326.0453   | 1.5  | 4.6  | 10.5 | 770.9 | 7.5          | C12 H12 N7 O Fe |

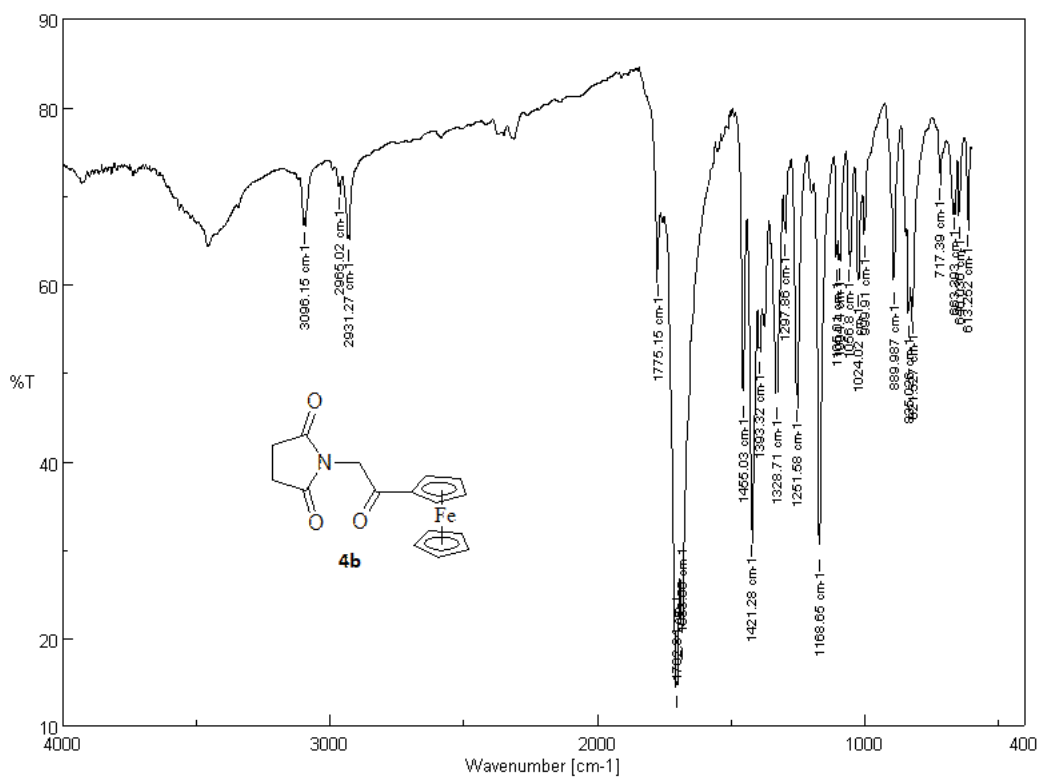

**Figure S13:**  $^1\text{H}$  (in in  $\text{CDCl}_3$ ),  $^{13}\text{C}$  (in in  $\text{CDCl}_3$ ) NMR, HR-MS and IR data for compound **4c**

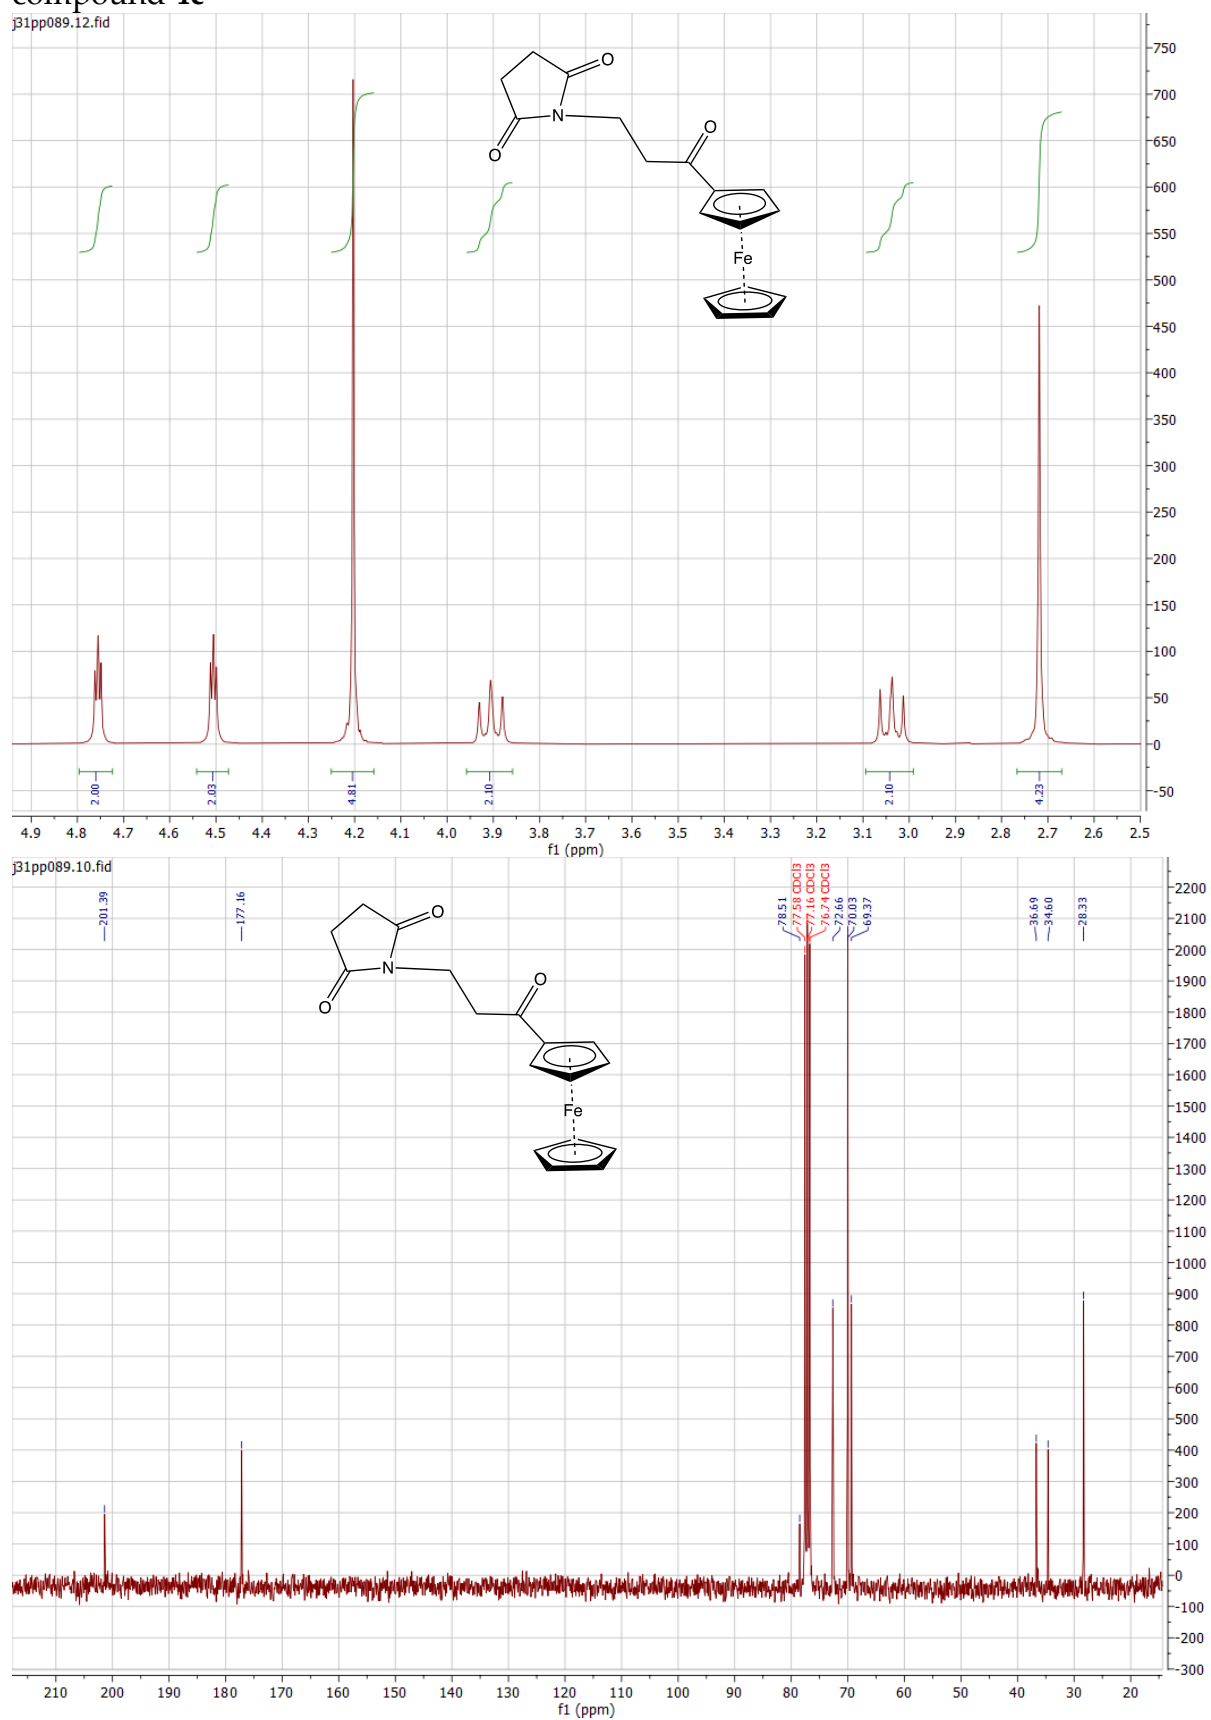

# Single Mass Analysis

Tolerance = 5.0 PPM / DBE: min = -1.5, max = 100.0

Element prediction: Off

Number of isotope peaks used for i-FIT = 9

Monoisotopic Mass, Even Electron Ions

332 formula(e) evaluated with 2 results within limits (all results (up to 1000) for each mass)

Elements Used:

C: 0-100 H: 1-120 N: 0-10 O: 0-10 Fe: 1-1

06-Sep-2013 5:8:9

ENSCP\_P724 24 (0.625) Cm (24.31)

MeOH

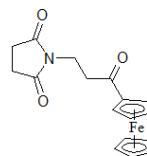

LCT Premier XE KE483  
1: TOF MS ES+  
3.09e+004

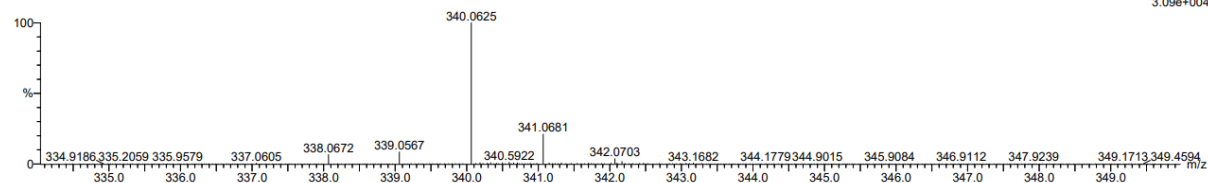

Minimum:

Maximum:

|          |            | 5.0  | 5.0  | -1.5  |       |              |                 |  |
|----------|------------|------|------|-------|-------|--------------|-----------------|--|
|          |            |      |      | 100.0 |       |              |                 |  |
| Mass     | Calc. Mass | mDa  | PPM  | DBE   | i-FIT | i-FIT (Norm) | Formula         |  |
| 340.0625 | 340.0636   | -1.1 | -3.2 | 9.5   | 975.5 | 0.0          | C17 H18 N O3 Fe |  |
|          | 340.0609   | 1.6  | 4.7  | 10.5  | 982.2 | 6.7          | C13 H14 N7 O Fe |  |

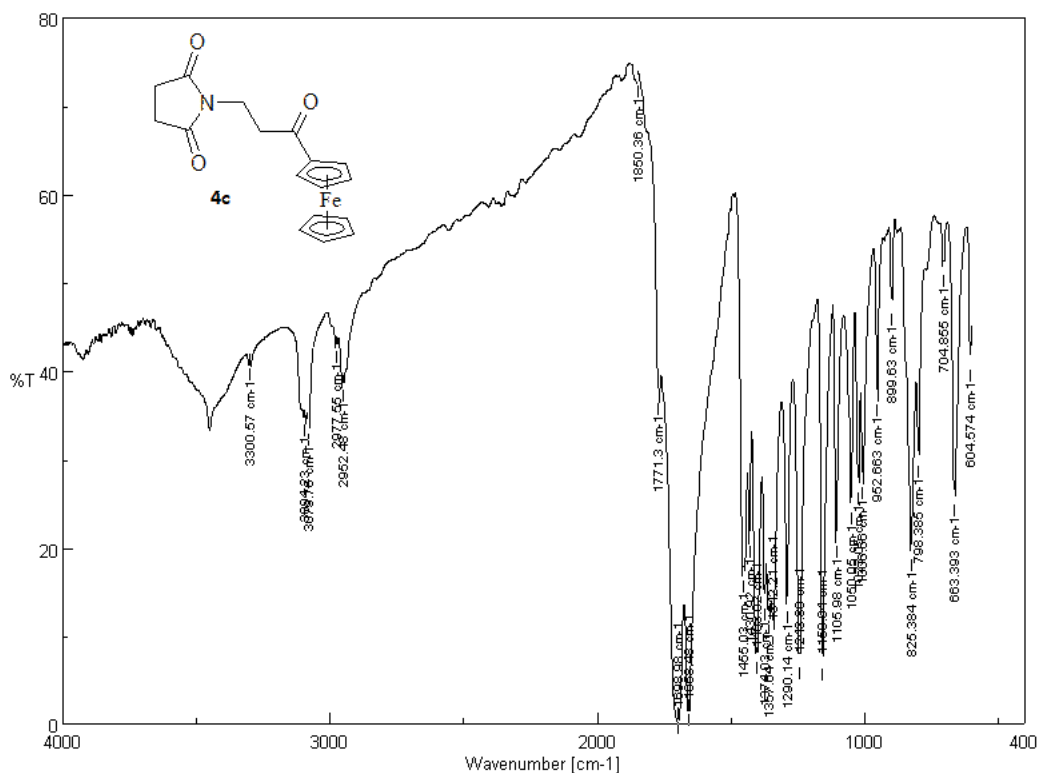



**Figure S14:**  $^1\text{H}$  (in  $\text{CDCl}_3$ ),  $^{13}\text{C}$  (in  $\text{CDCl}_3$ ) NMR, HR-MS and IR data for compound **4d**

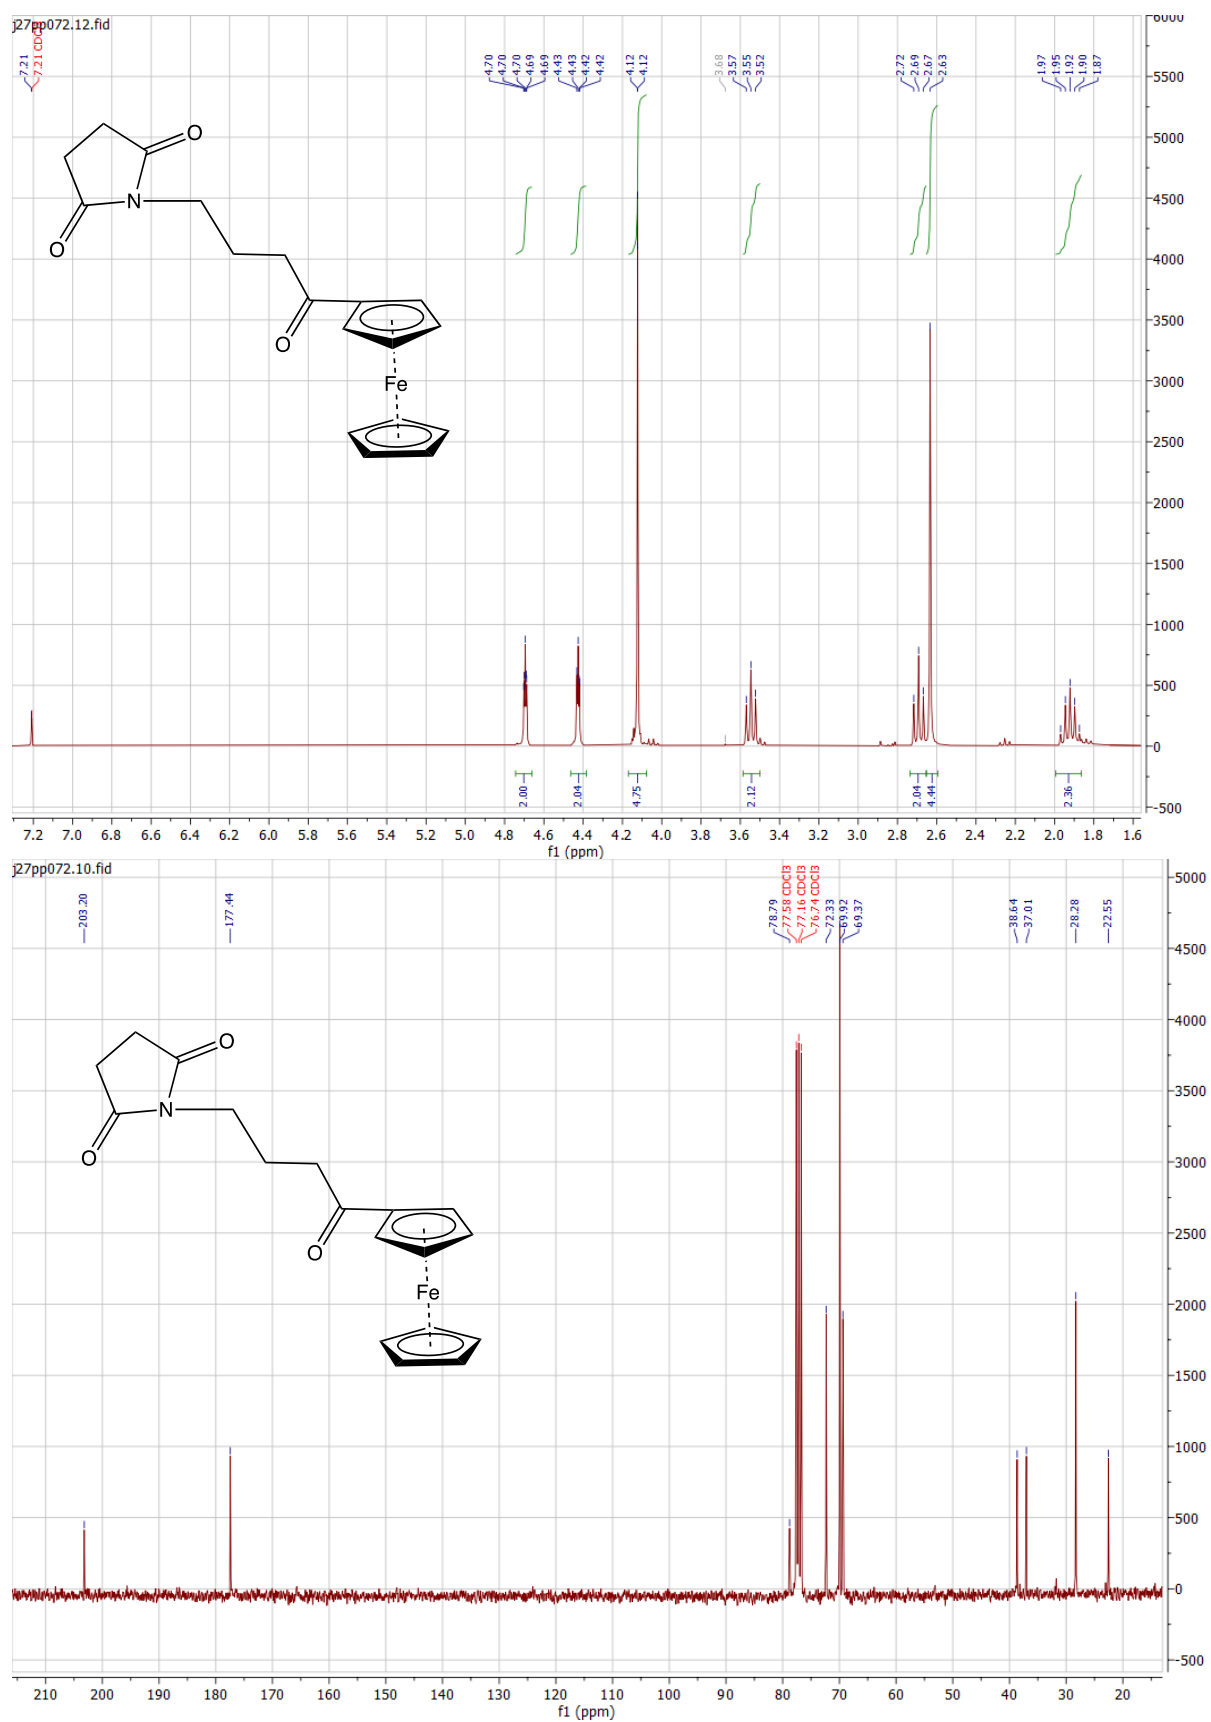

# Single Mass Analysis

Tolerance = 5.0 PPM / DBE: min = -1.5, max = 100.0

Element prediction: Off

Number of isotope peaks used for i-FIT = 9

Monoisotopic Mass, Even Electron Ions

356 formula(e) evaluated with 1 results within limits (all results (up to 1000) for each mass)

Elements Used:

C: 0-100 H: 1-120 N: 0-10 O: 0-10 Fe: 1-1

06-Sep-2013 5:33:2

ENSCP\_P726 21 (0.573) Cm (20:28)

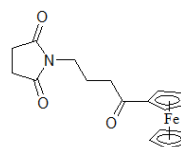

LCT Premier XE KE483  
1: TOF MS ES+  
4.84e+004

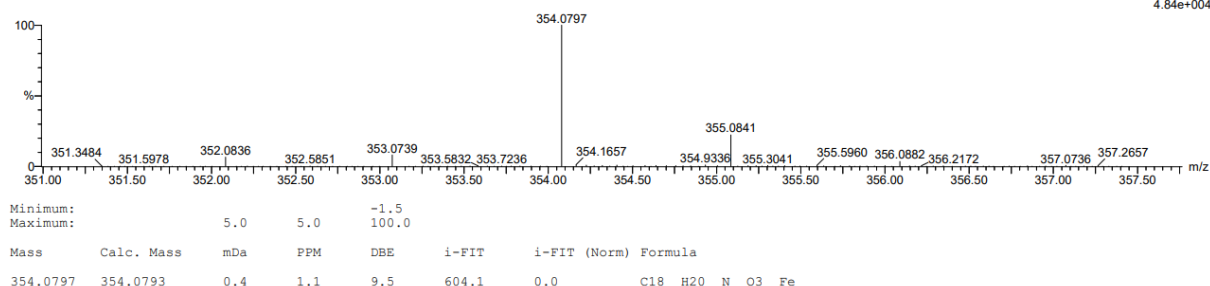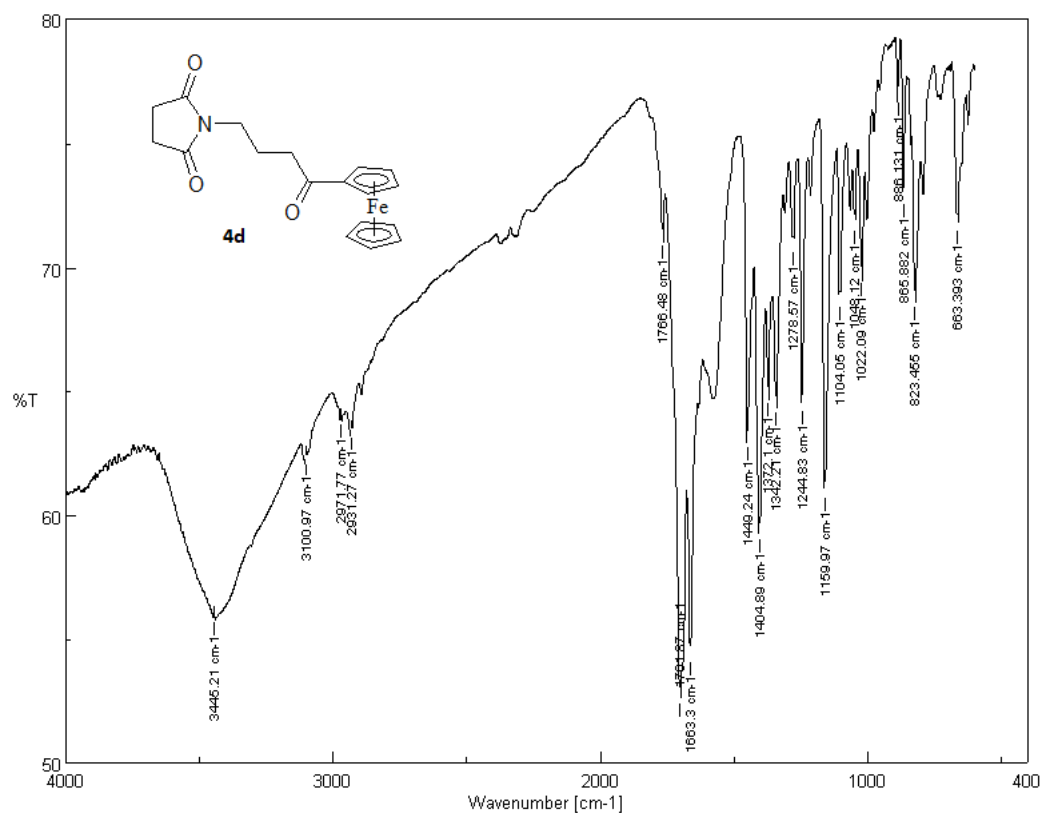

**Figure S15:**  $^1\text{H}$  (in  $\text{CDCl}_3$ ),  $^{13}\text{C}$  (in  $\text{CDCl}_3$ ) NMR, HR-MS and IR data for compound **4f**

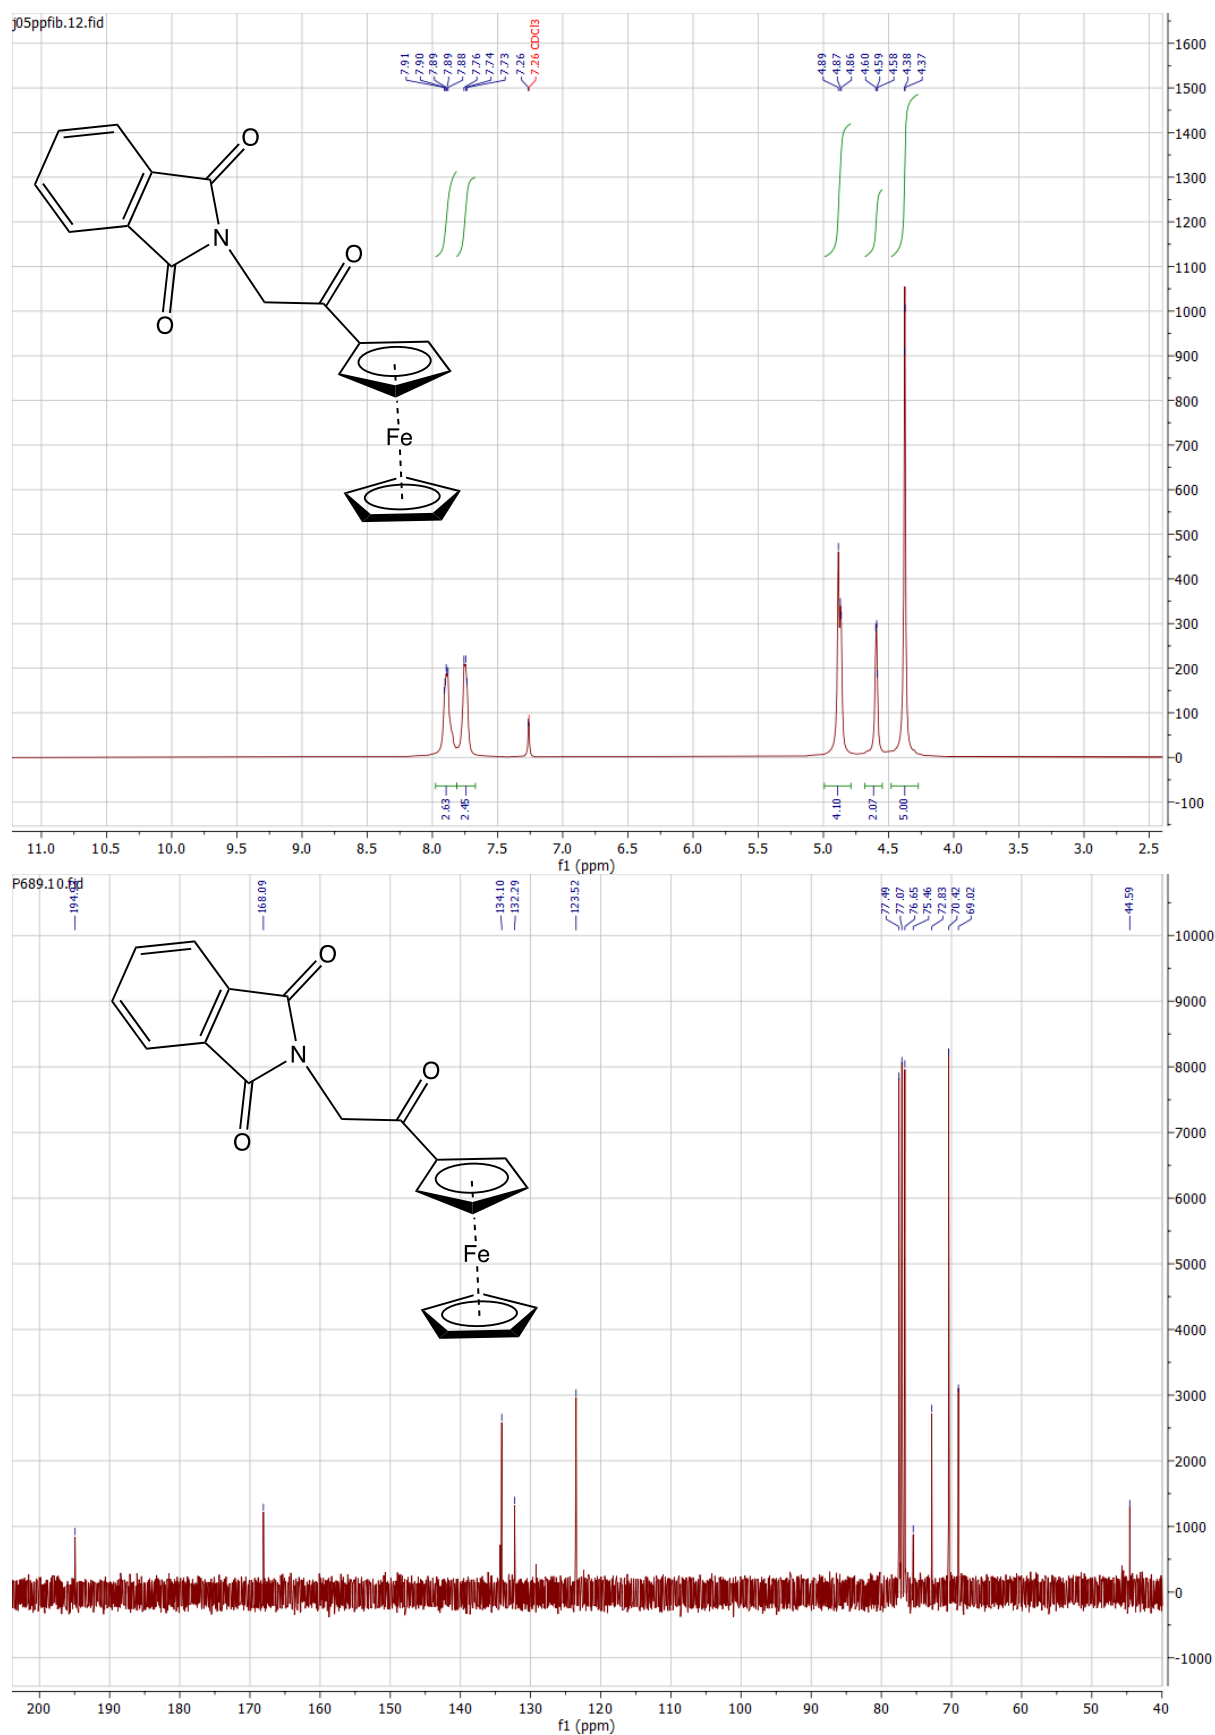



**Figure S16:**  $^1\text{H}$  (in  $\text{CDCl}_3$ ),  $^{13}\text{C}$  (in  $\text{CDCl}_3$ ) NMR, HR-MS and IR data for compound **4g**

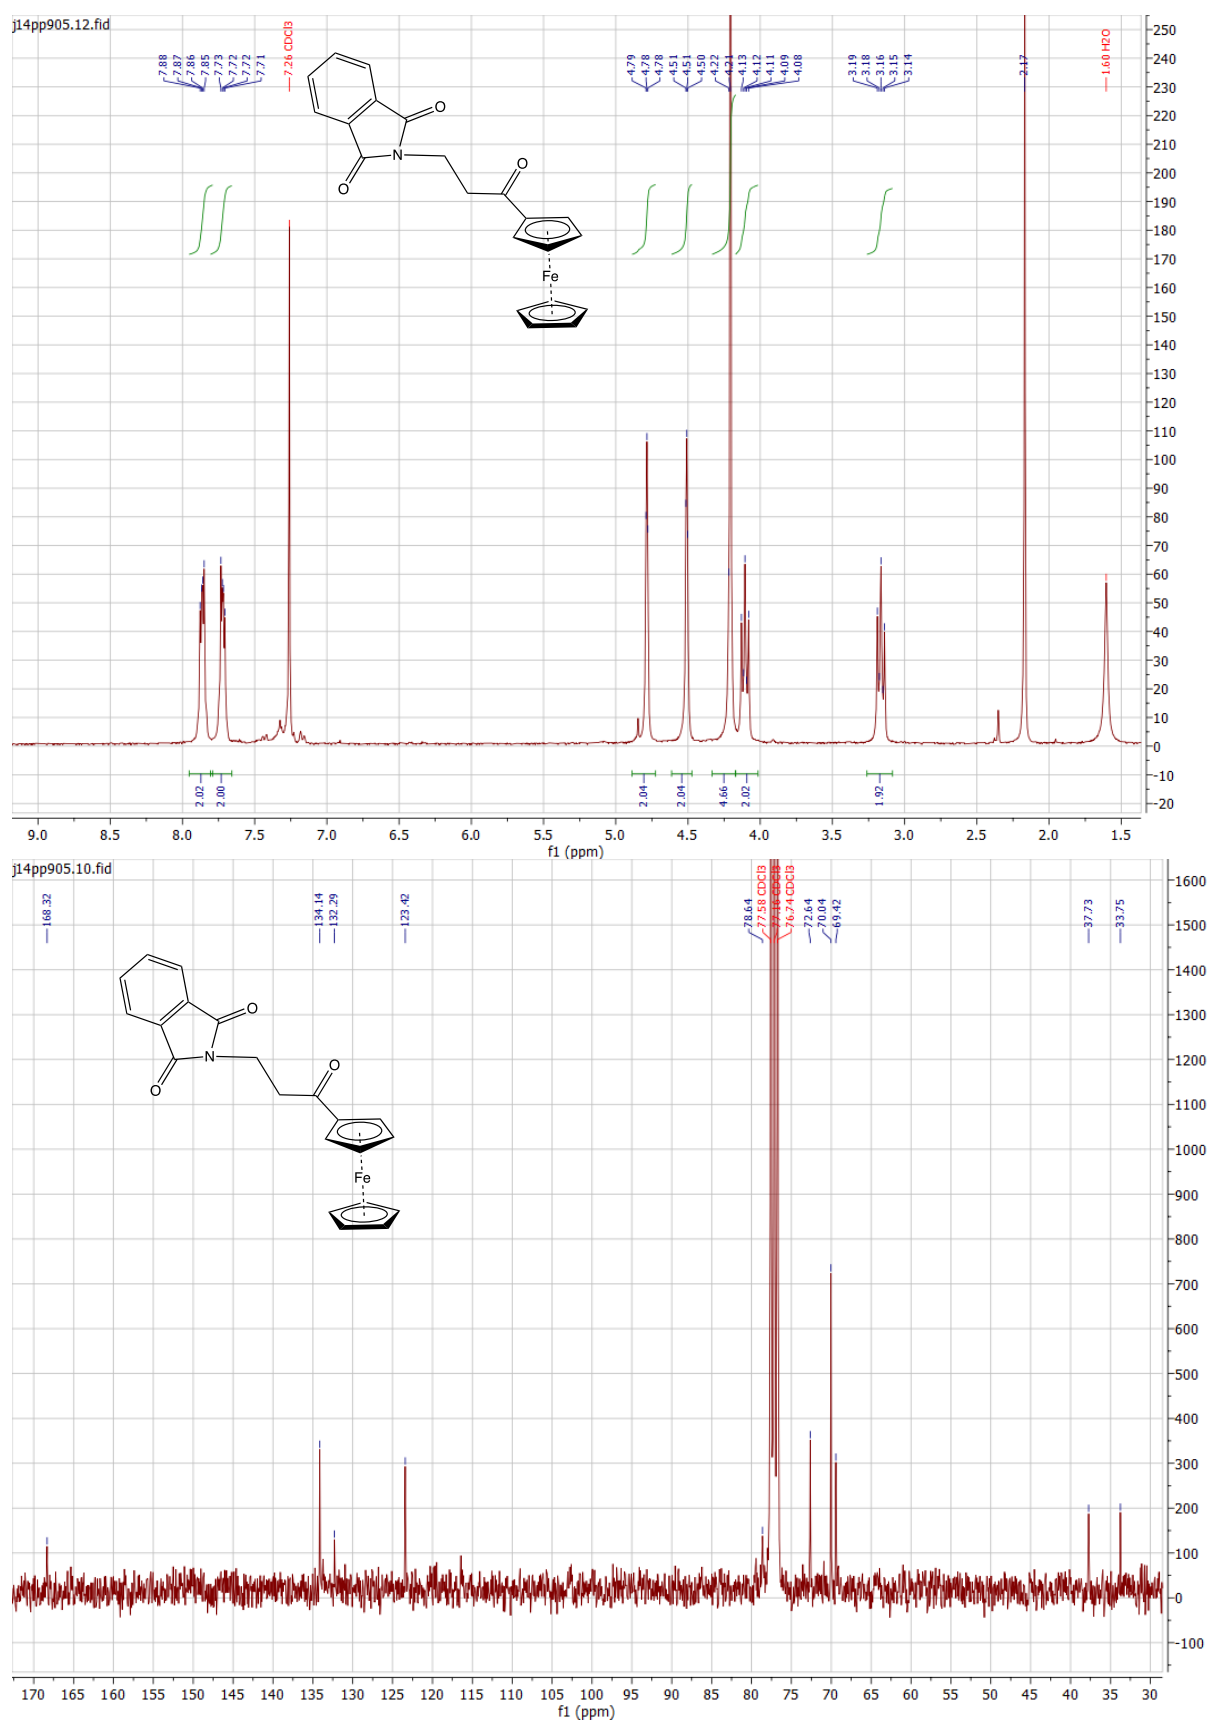

# Single Mass Analysis

Tolerance = 5.0 PPM / DBE: min = -1.5, max = 100.0

Element prediction: Off

Number of isotope peaks used for i-FIT = 9

Monoisotopic Mass, Even Electron Ions

401 formula(e) evaluated with 3 results within limits (all results (up to 1000) for each mass)

Elements Used:

C: 0-100 H: 1-120 N: 0-10 O: 0-10 Fe: 1-1

06-Sep-2013 5:21:1

ENSCP\_P662 26 (0.680) Cm (26.32)

MeOH

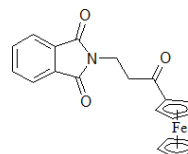

LCT Premier XE KE483  
1: TOF MS ES+  
2.21e+004

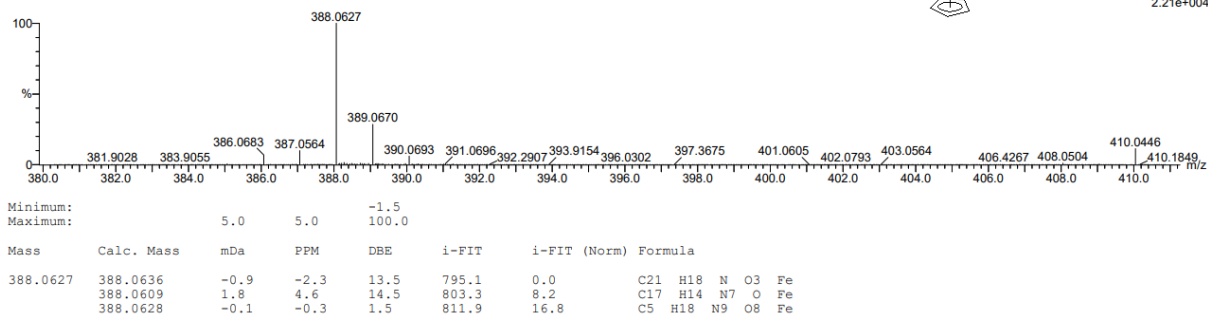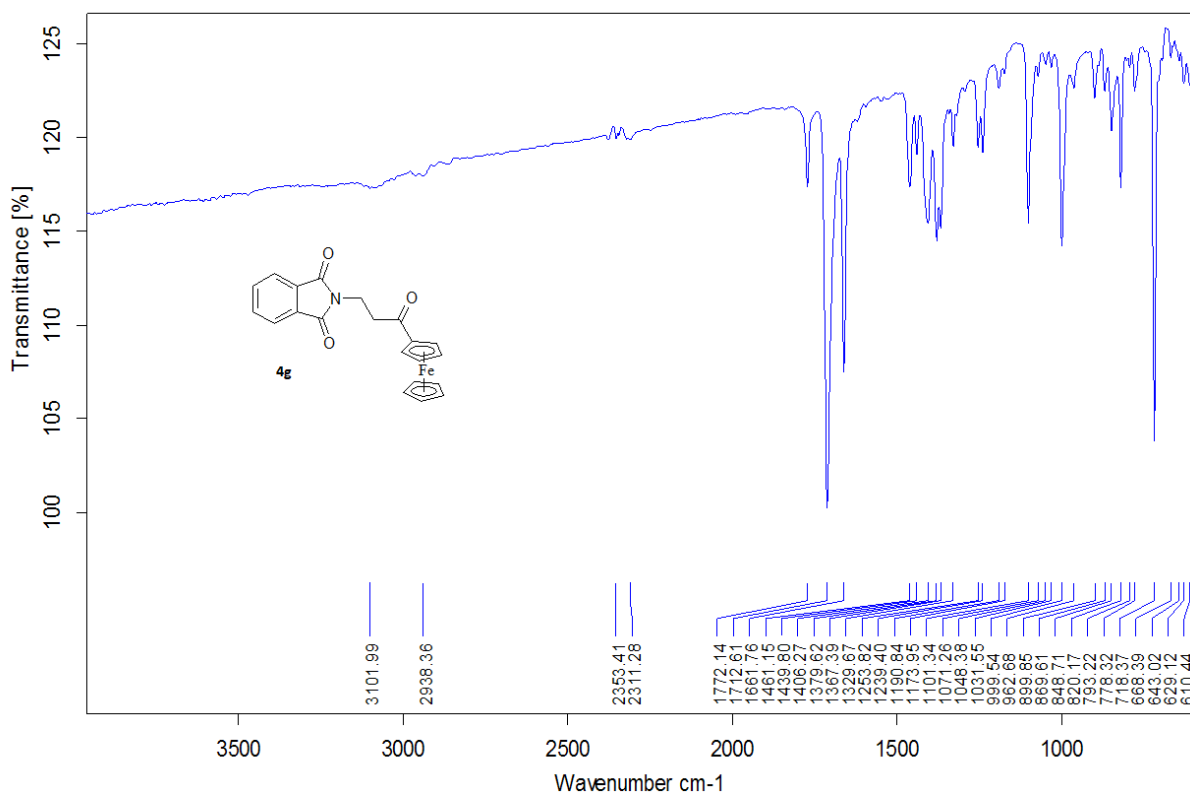

**Figure S17:**  $^1\text{H}$  (in  $\text{CDCl}_3$ ),  $^{13}\text{C}$  (in  $\text{CDCl}_3$ ) NMR, HR-MS and IR data for compound **4h**

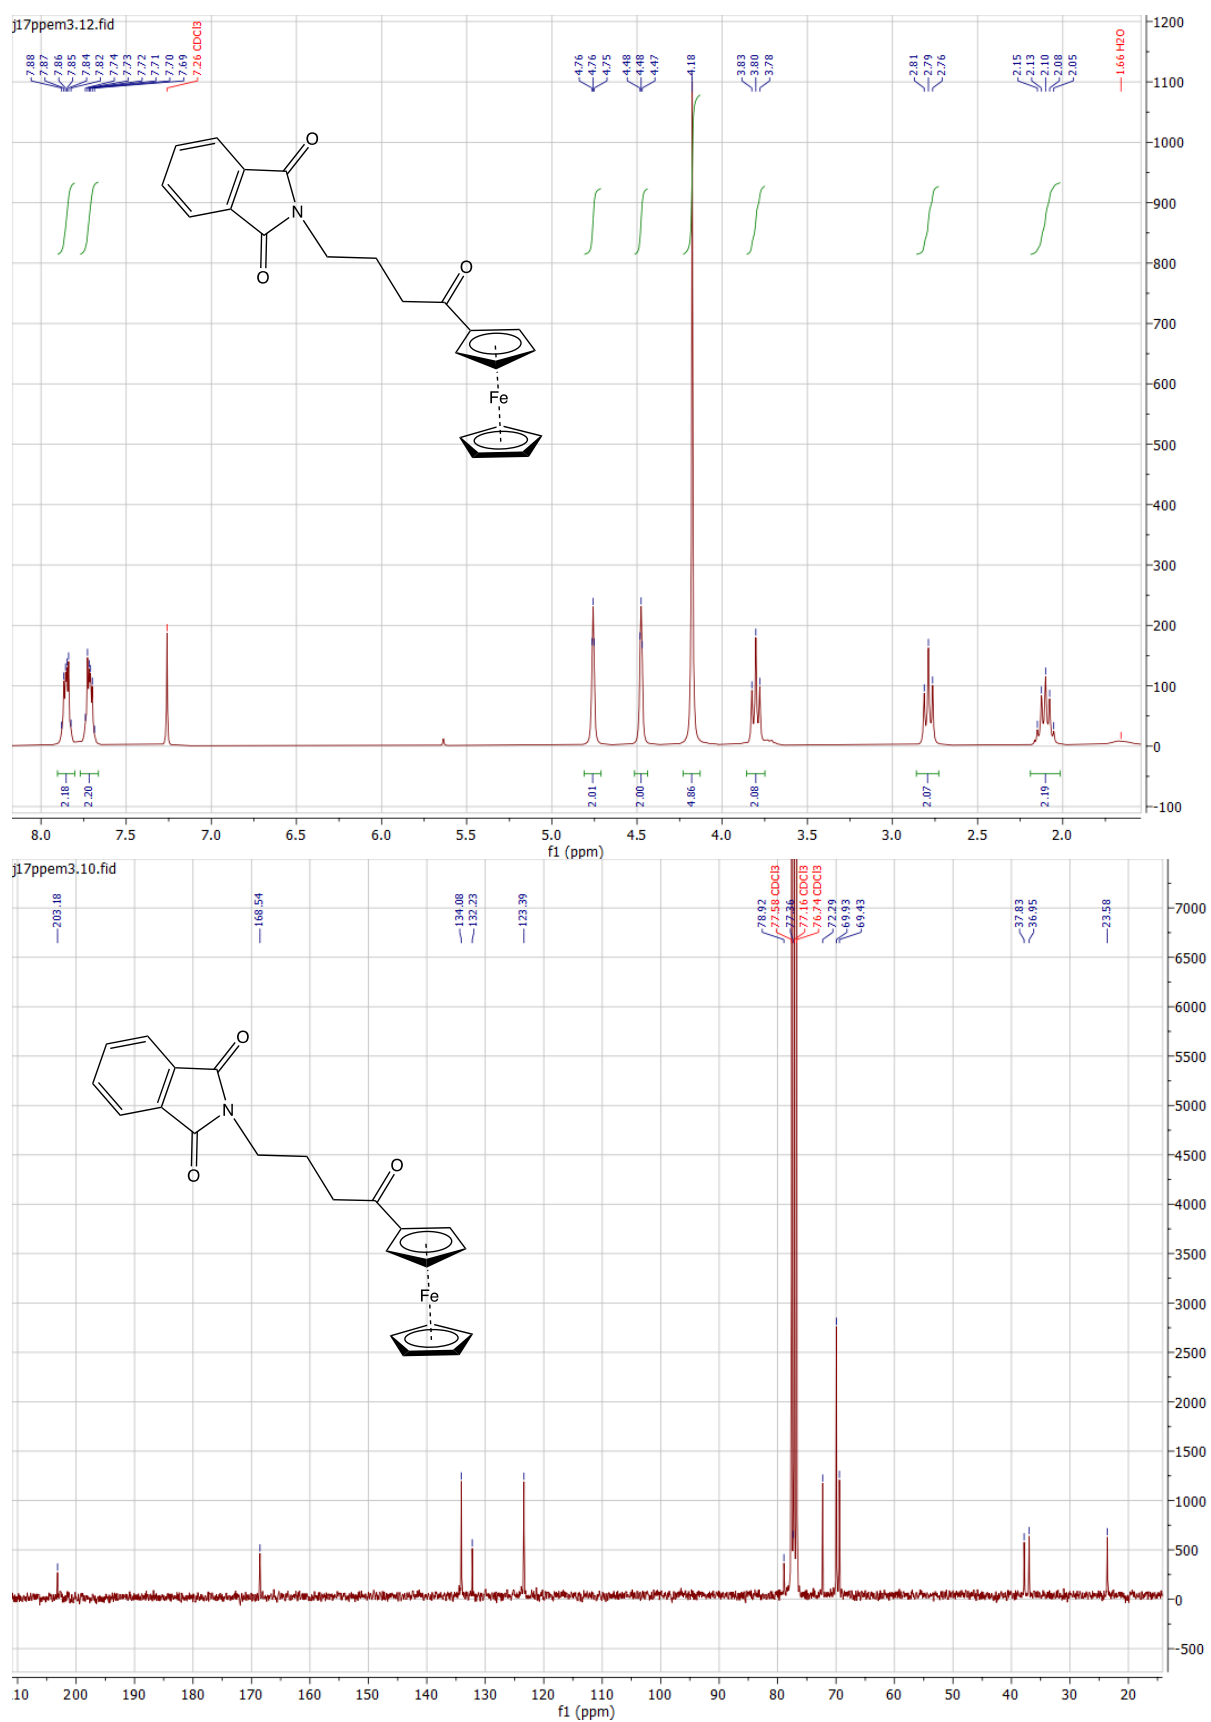

# Single Mass Analysis

Tolerance = 5.0 PPM / DBE: min = -1.5, max = 100.0

Element prediction: Off

Number of isotope peaks used for i-FIT = 9

Monoisotopic Mass, Even Electron Ions

423 formula(e) evaluated with 2 results within limits (all results (up to 1000) for each mass)

Elements Used:

C: 0-100 H: 1-120 N: 0-10 O: 0-10 Fe: 1-1

06-Sep-2013 5:5:9

ENSCP\_P671 28 (0.715) Cm (28.38)

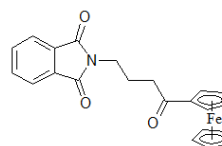

LCT Premier XE KE483  
1: TOF MS ES+  
1.37e+004

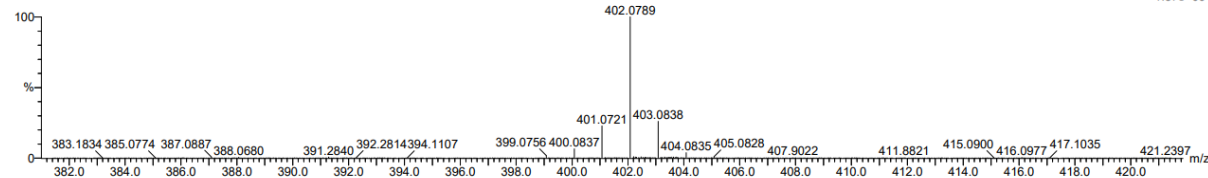

| Minimum: |            |      |      | -1.5  |       |              |         |     |          |
|----------|------------|------|------|-------|-------|--------------|---------|-----|----------|
| Maximum: |            | 5.0  | 5.0  | 100.0 |       |              |         |     |          |
| Mass     | Calc. Mass | mDa  | PPM  | DBE   | i-FIT | i-FIT (Norm) | Formula |     |          |
| 402.0789 | 402.0793   | -0.4 | -1.0 | 13.5  | 810.4 | 0.0          | C22     | H20 | N O3 Fe  |
|          | 402.0784   | 0.5  | 1.2  | 1.5   | 824.7 | 14.3         | C6      | H20 | N9 O8 Fe |

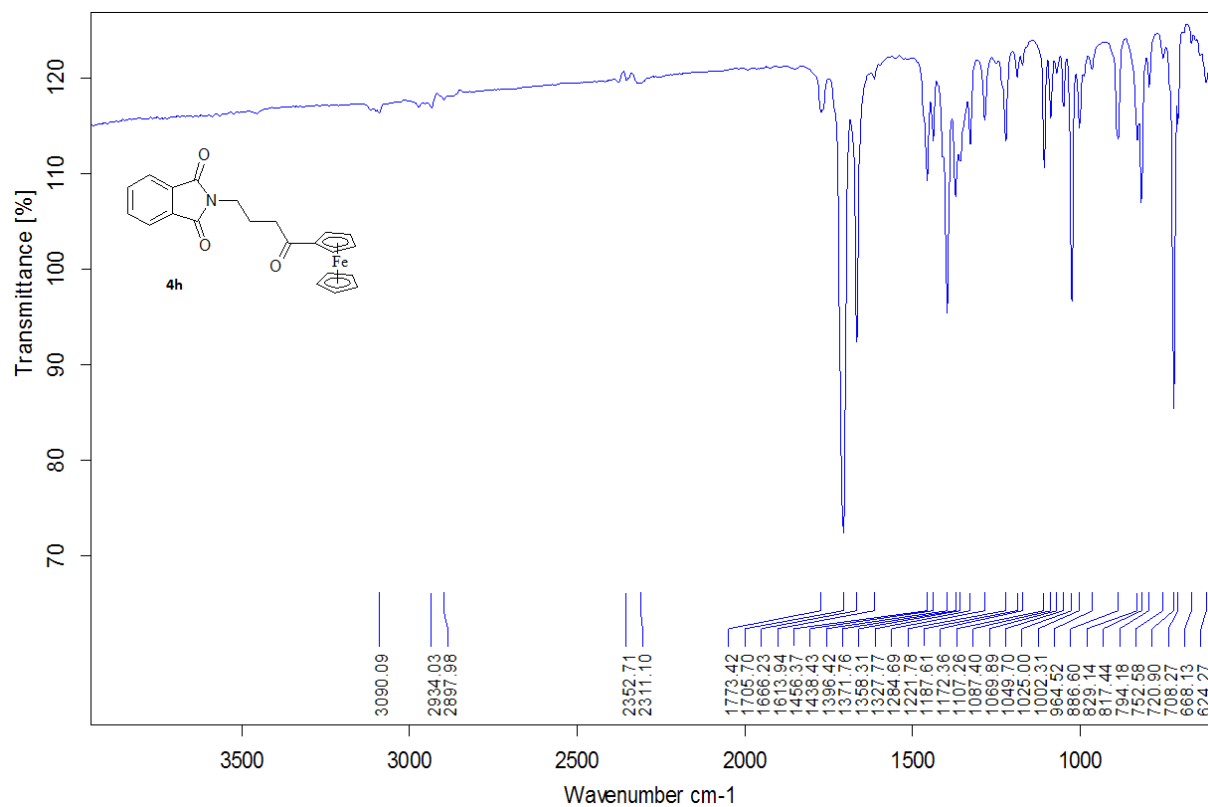



**Figure S18:**  $^1\text{H}$  (in  $\text{DMSO-d}_6$ ),  $^{13}\text{C}$  (in  $\text{DMSO-d}_6$ ), COSY (in  $\text{DMSO-d}_6$ ) NMR, NMR, HR-MS and IR data for compound **6a**

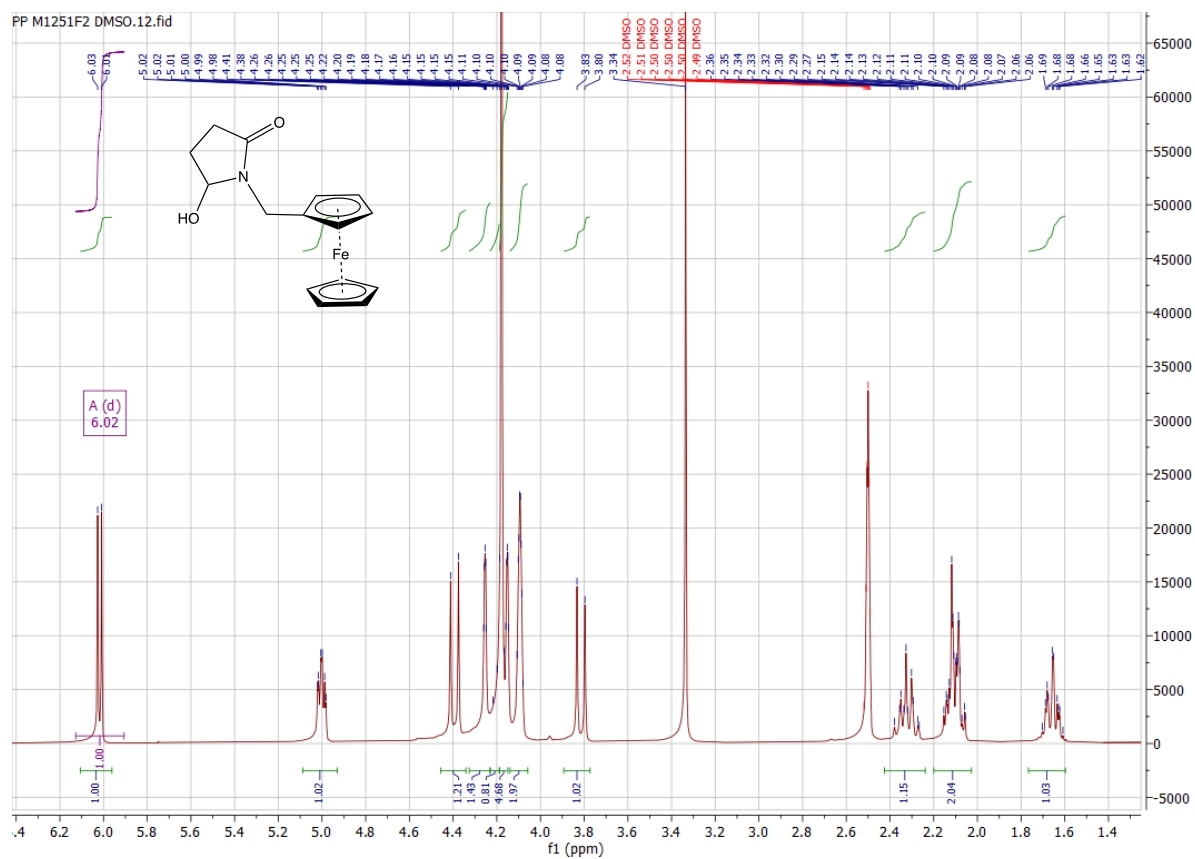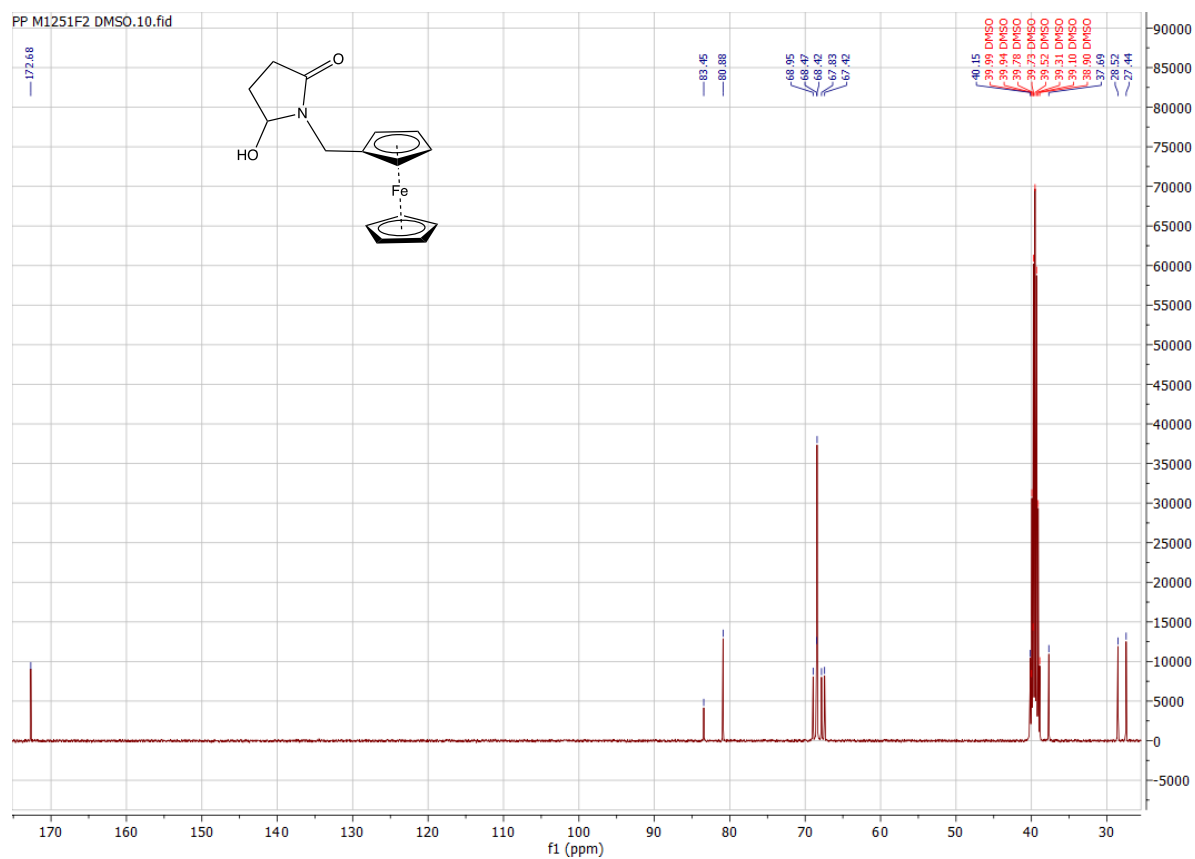

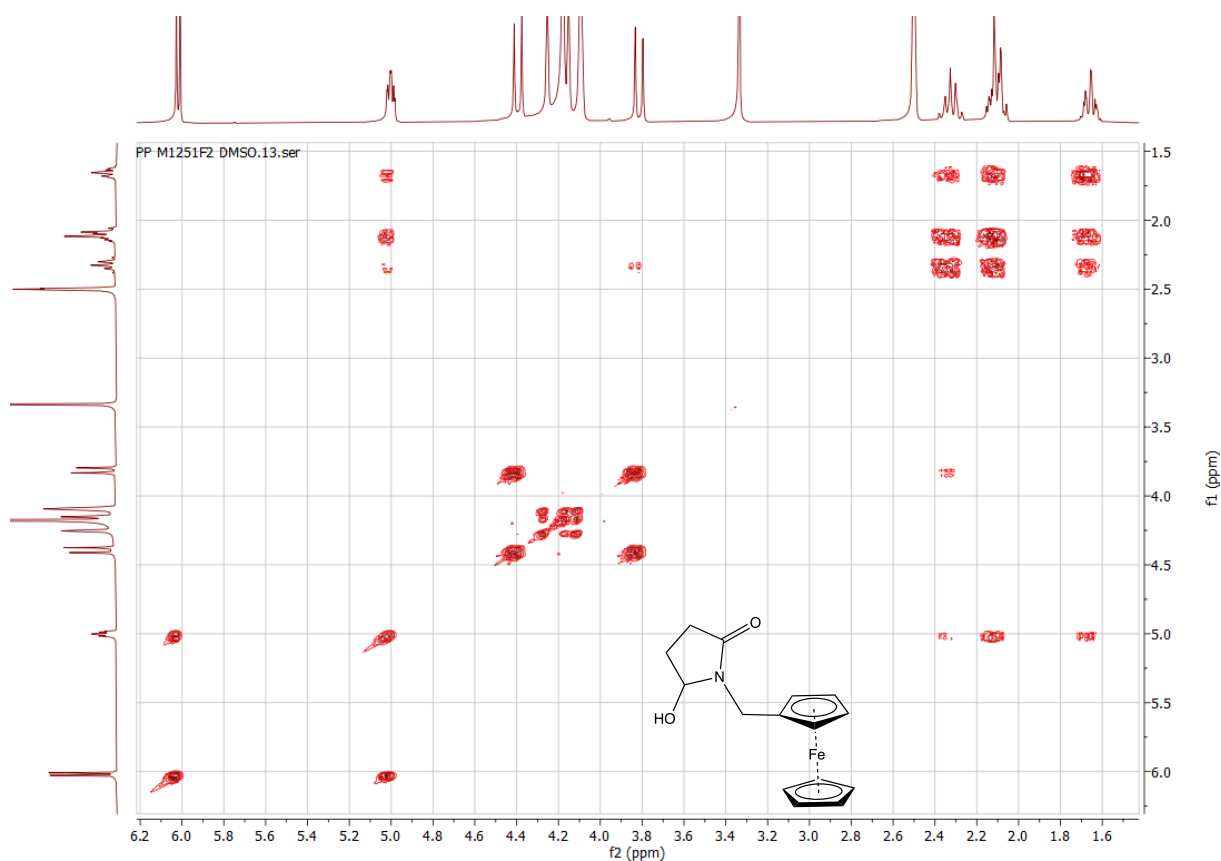

C:\Xcalibur\data\Analyses\H-09897  
MeCN

3/7/2022 3:47:47 PM

Pascal Pigeon P954

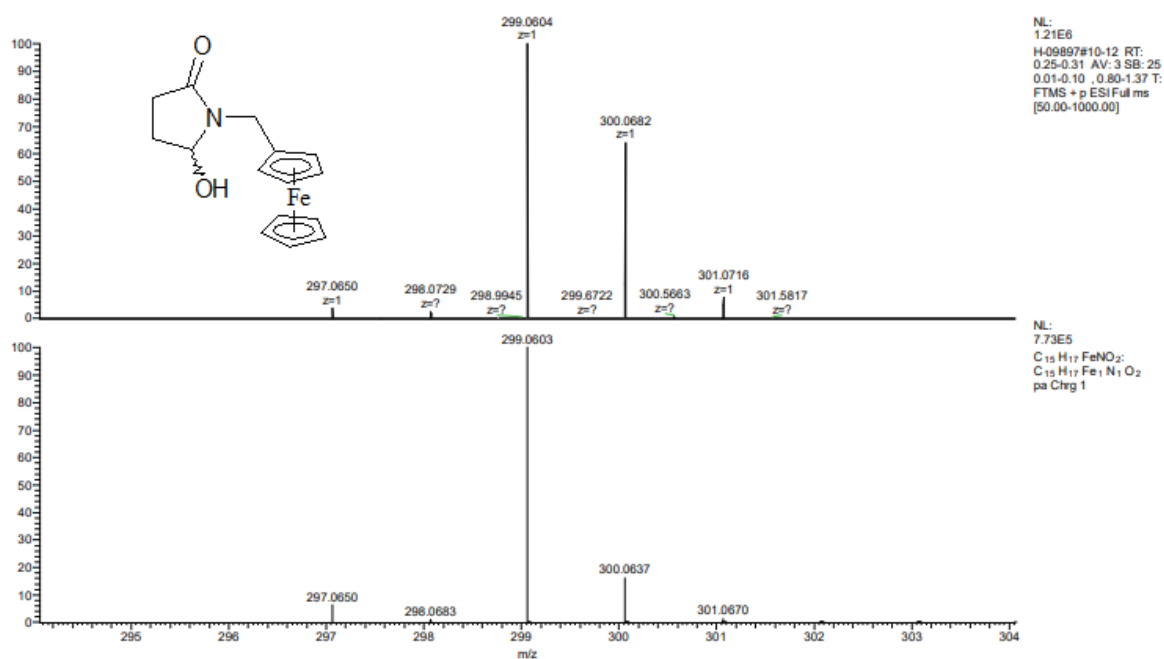

## Experimental/theoretical isotopic pattern MS spectrum

Error = 0.3 ppm; Relative Intensity (%) 100

HRMS (ESI) m/z: [M]<sup>+</sup> Calcd for C<sub>15</sub>H<sub>17</sub>FeNO<sub>2</sub> 299.0603 . Found 299.0604; (Error: 0.3 ppm).

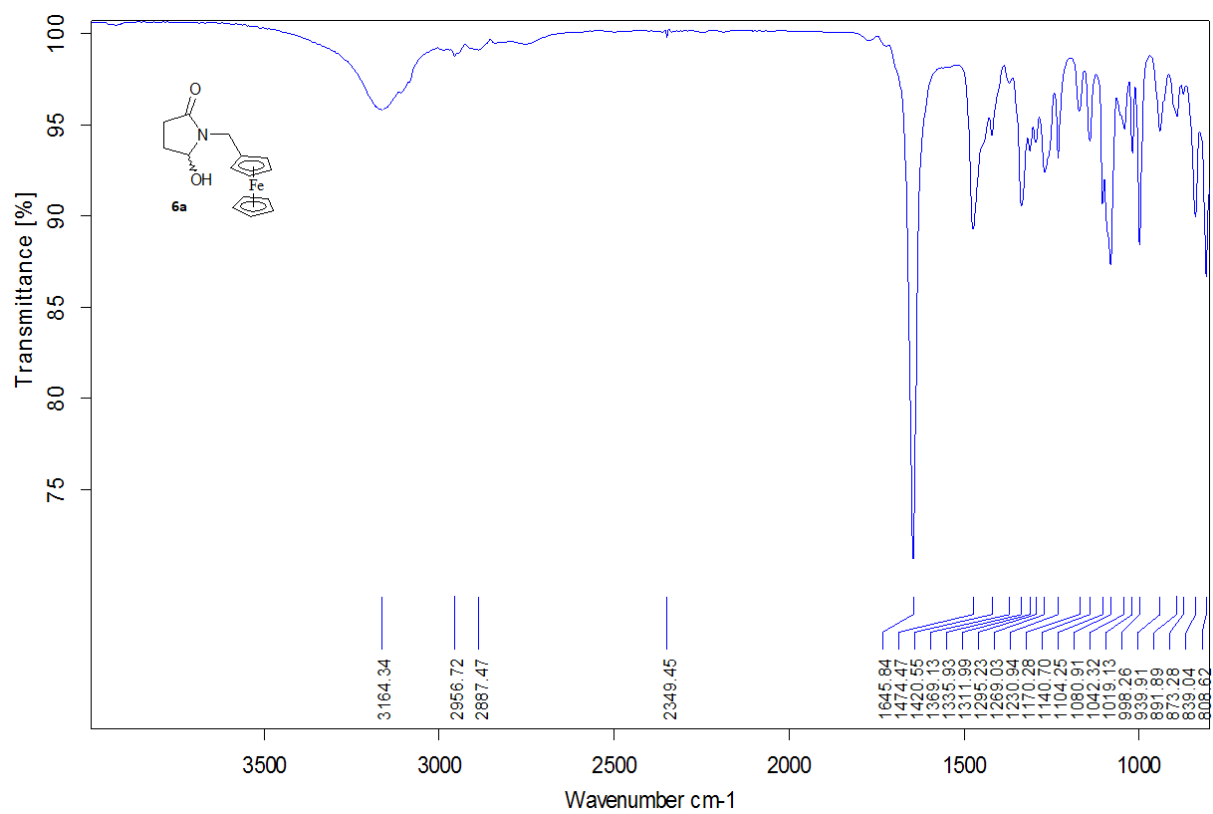

**Figure S19:**  $^1\text{H}$  (in  $\text{DMSO-d}_6$ ),  $^{13}\text{C}$  (in  $\text{DMSO-d}_6$ ), COSY (in  $\text{DMSO-d}_6$ ), HMQC (in  $\text{DMSO-d}_6$ ) NMR and IR data for compound **7a**

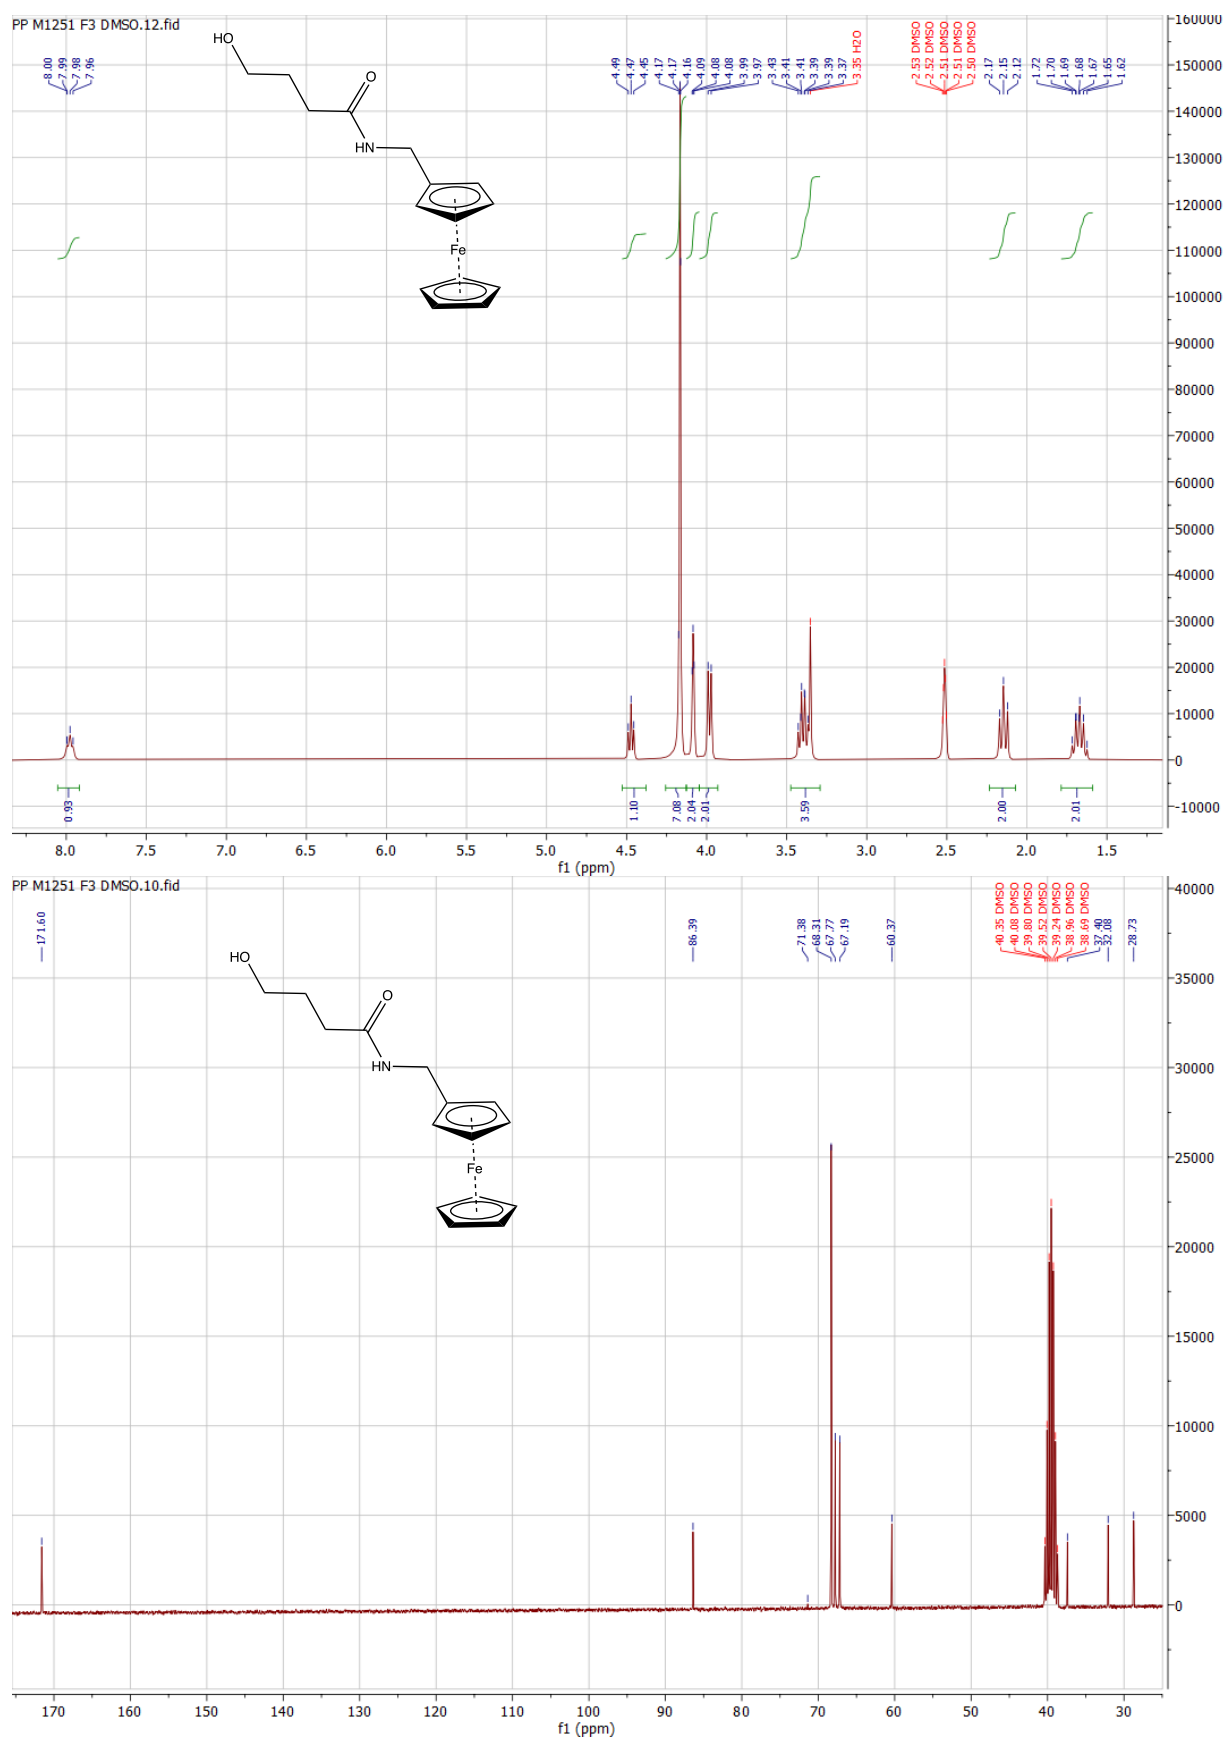

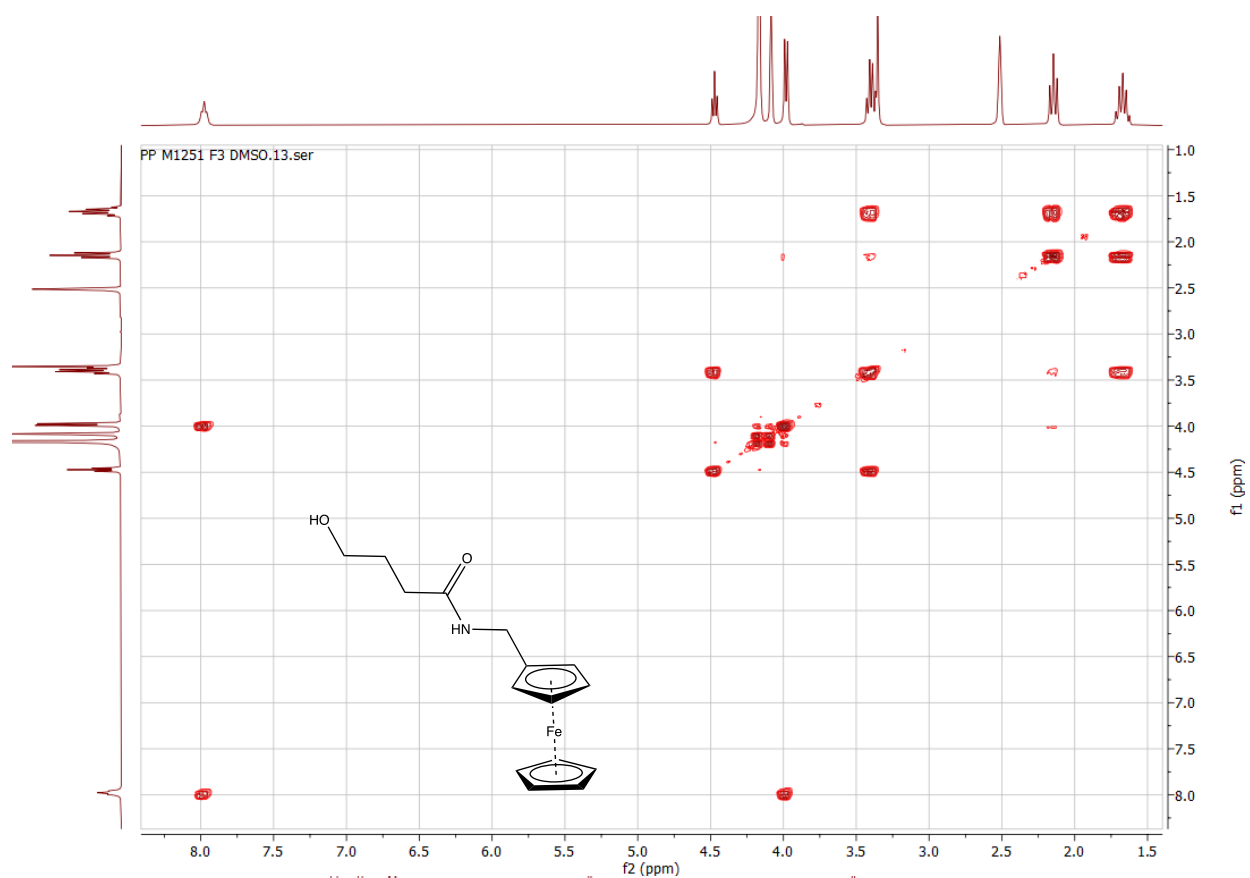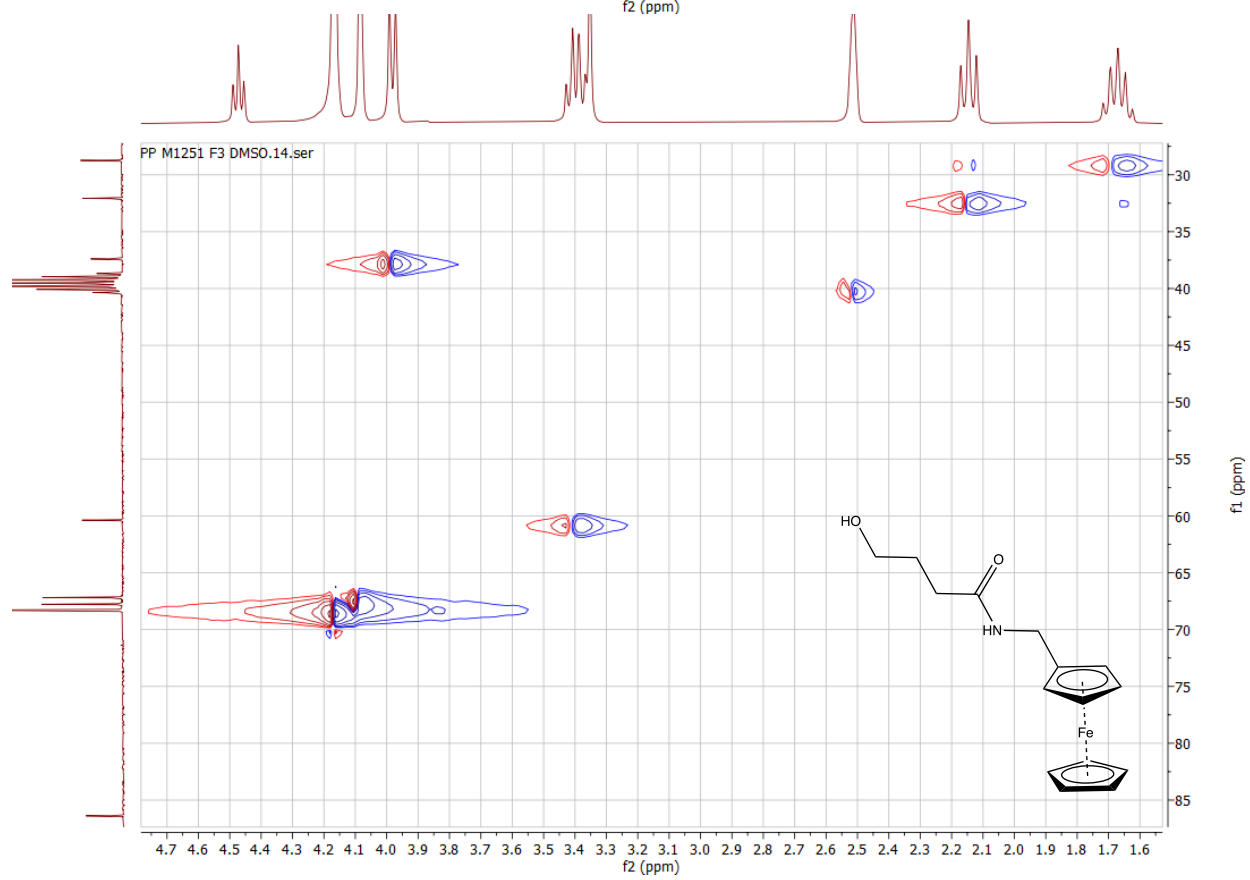

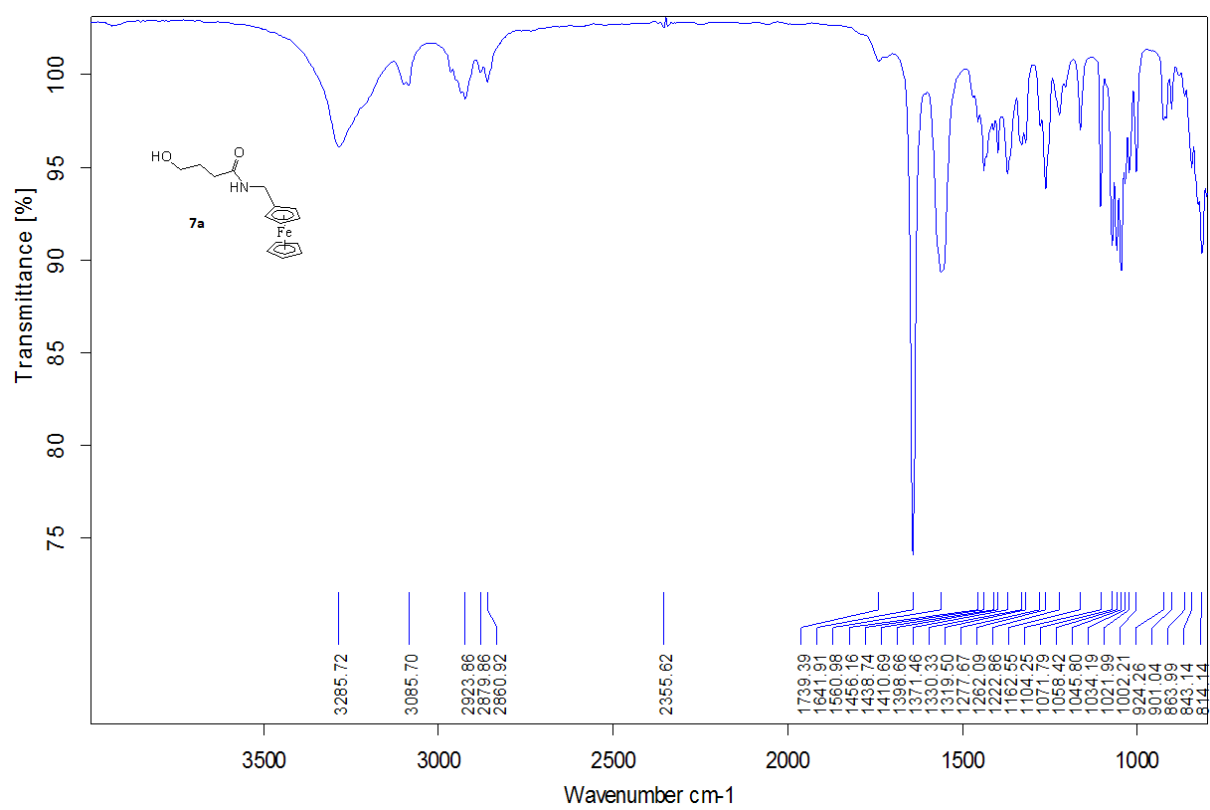

**Figure S20:**  $^1\text{H}$  (in  $\text{DMSO-d}_6$ ) NMR for compound **6b**

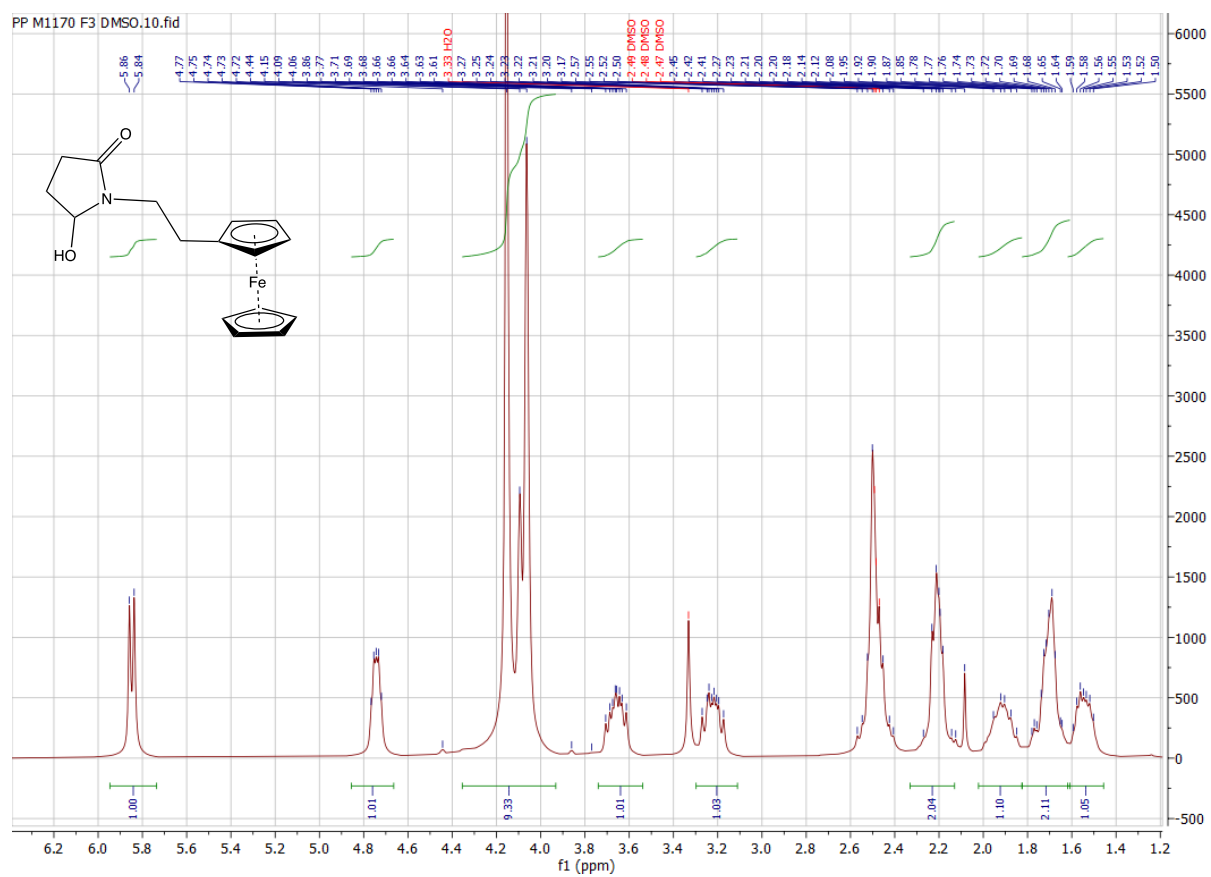

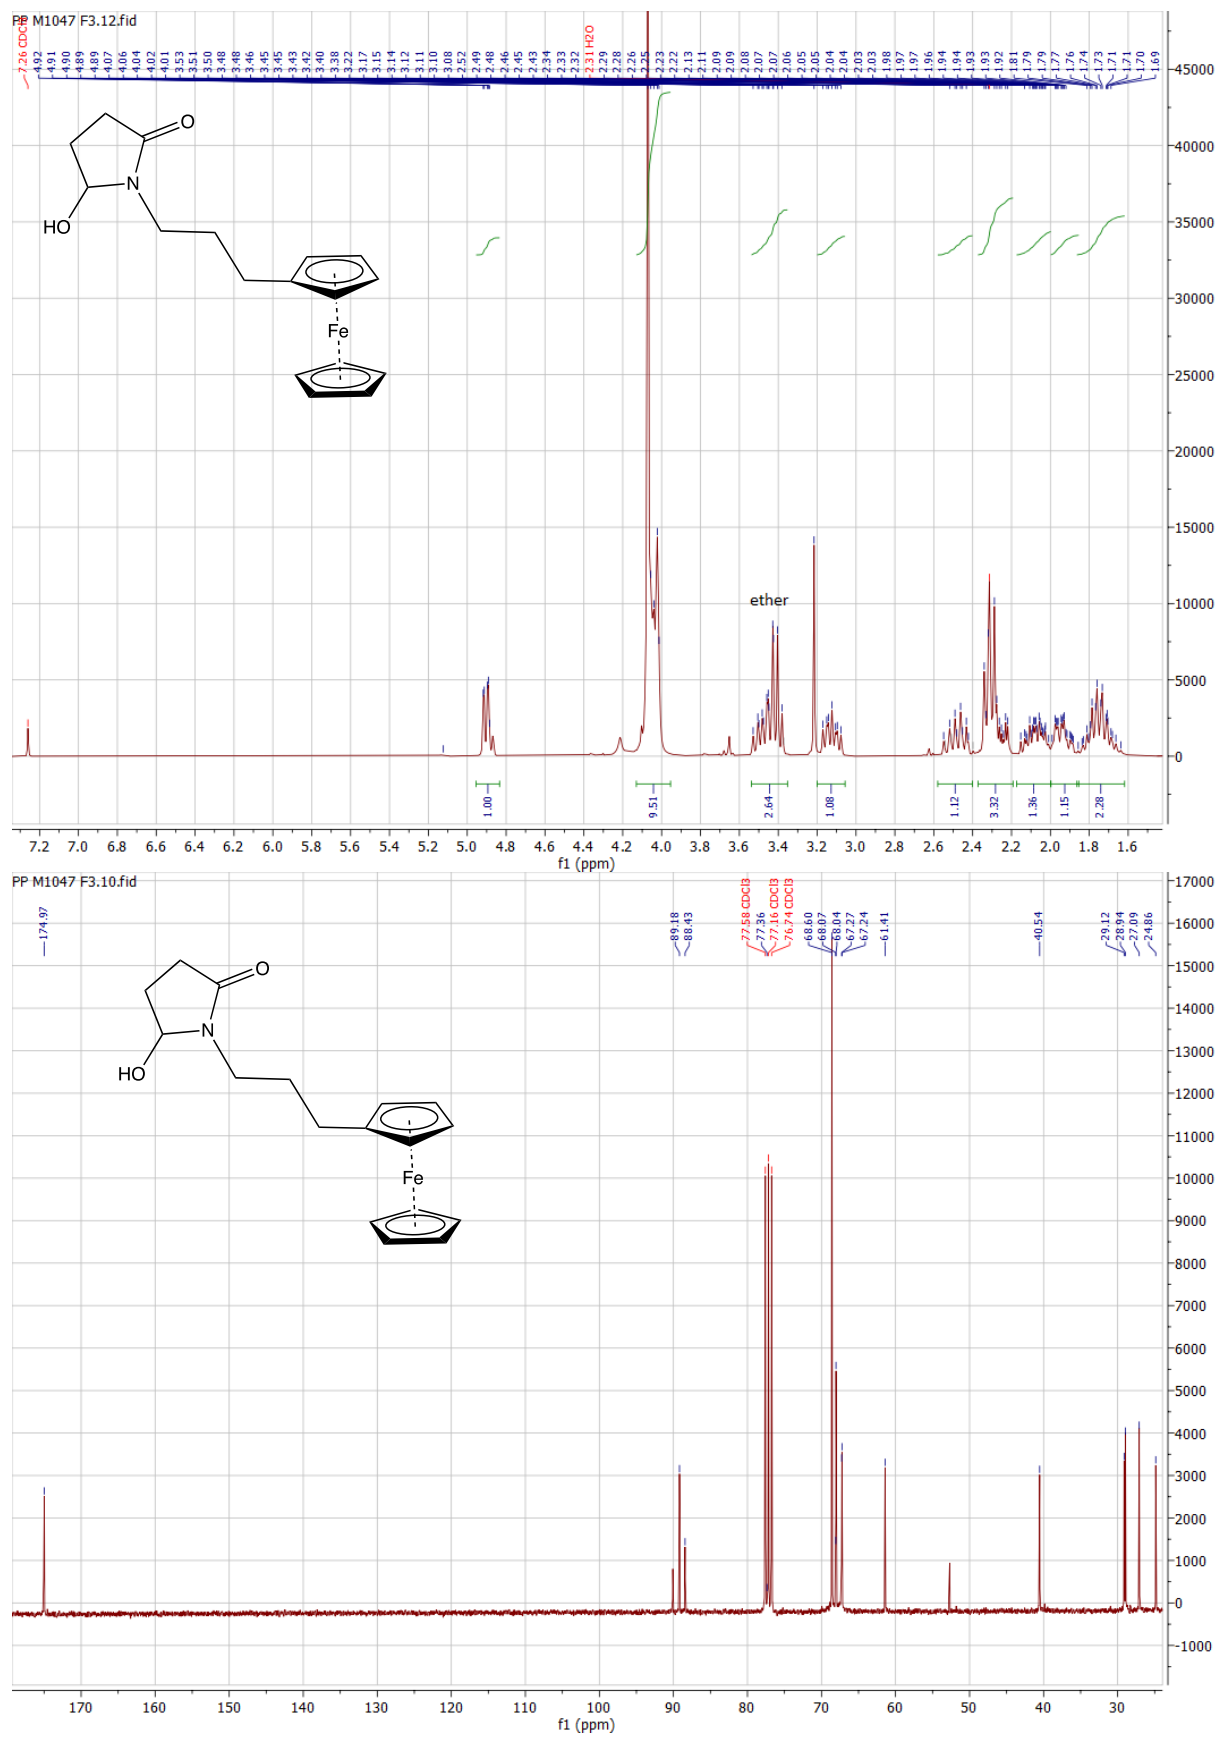



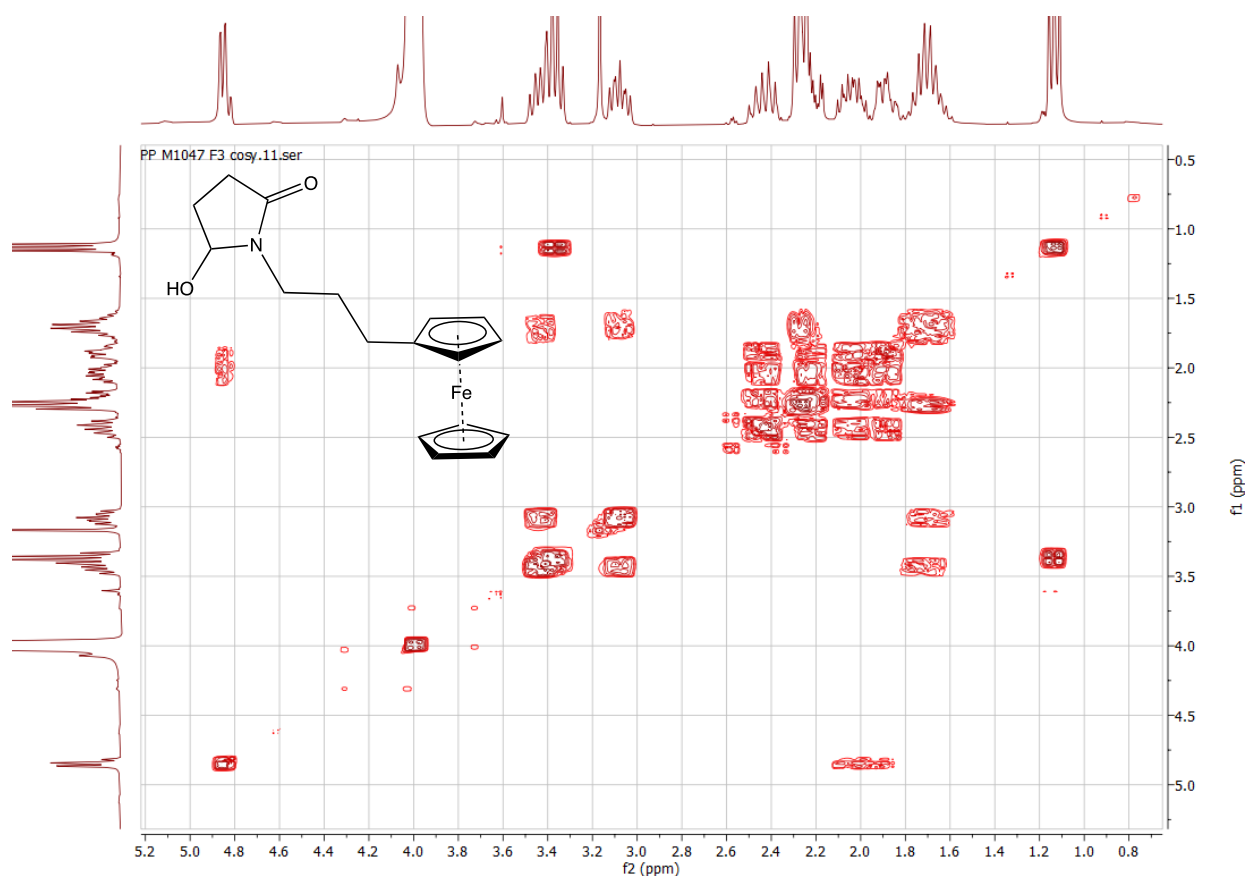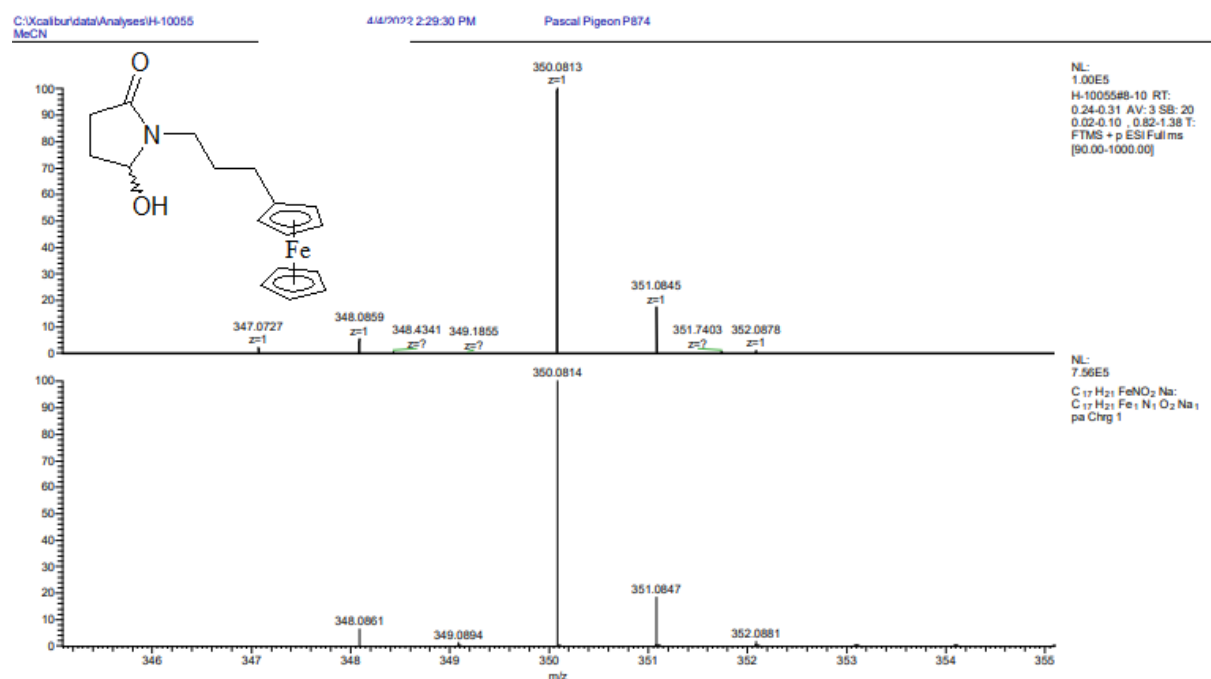

## Experimental/theoretical isotopic pattern MS spectrum

Error = -0.2 ppm; Relative Intensity (%) 100

HRMS (ESI) m/z: [M+Na]<sup>+</sup> Calcd for C<sub>17</sub>H<sub>21</sub>FeNO<sub>2</sub>Na 350.0814. Found 350.0813; (Error: -0.2 ppm).

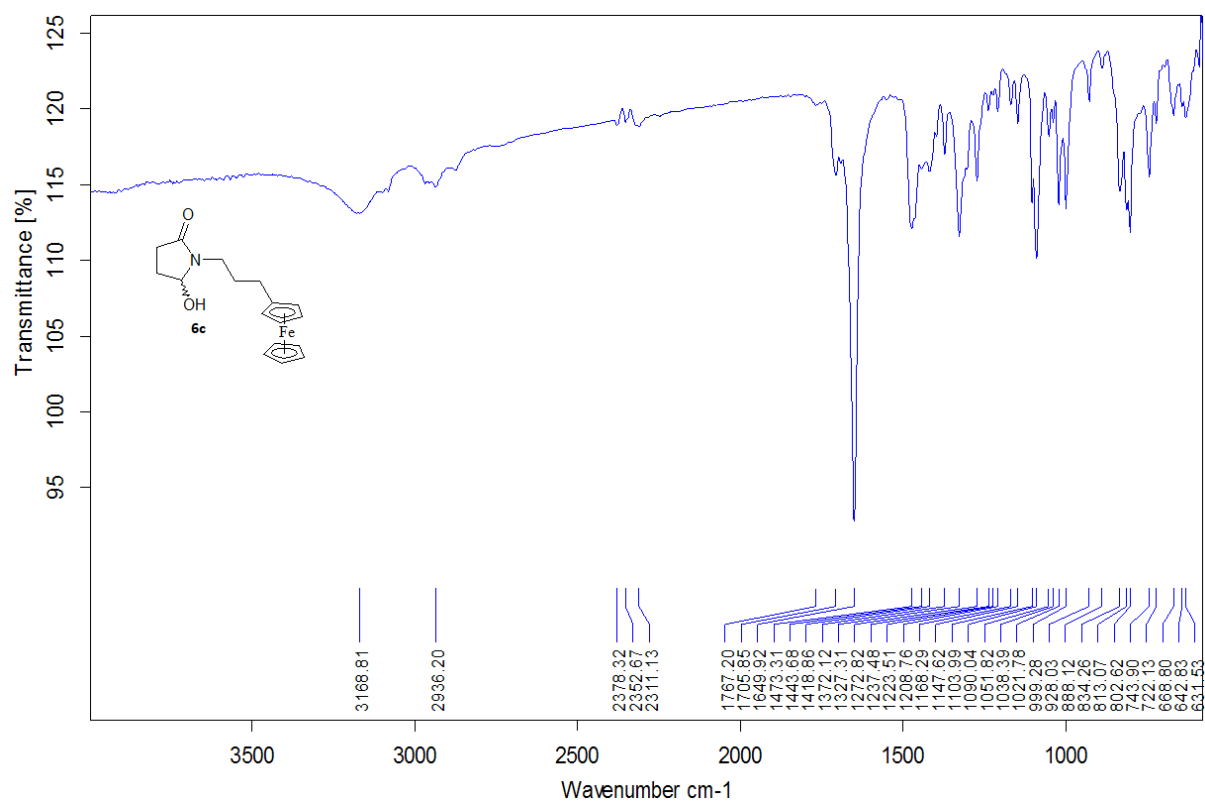

**Figure S22:**  $^1\text{H}$  (in  $\text{DMSO-d}_6$ ),  $^{13}\text{C}$  (in  $\text{DMSO-d}_6$ ) NMR and IR data for compound **6e**

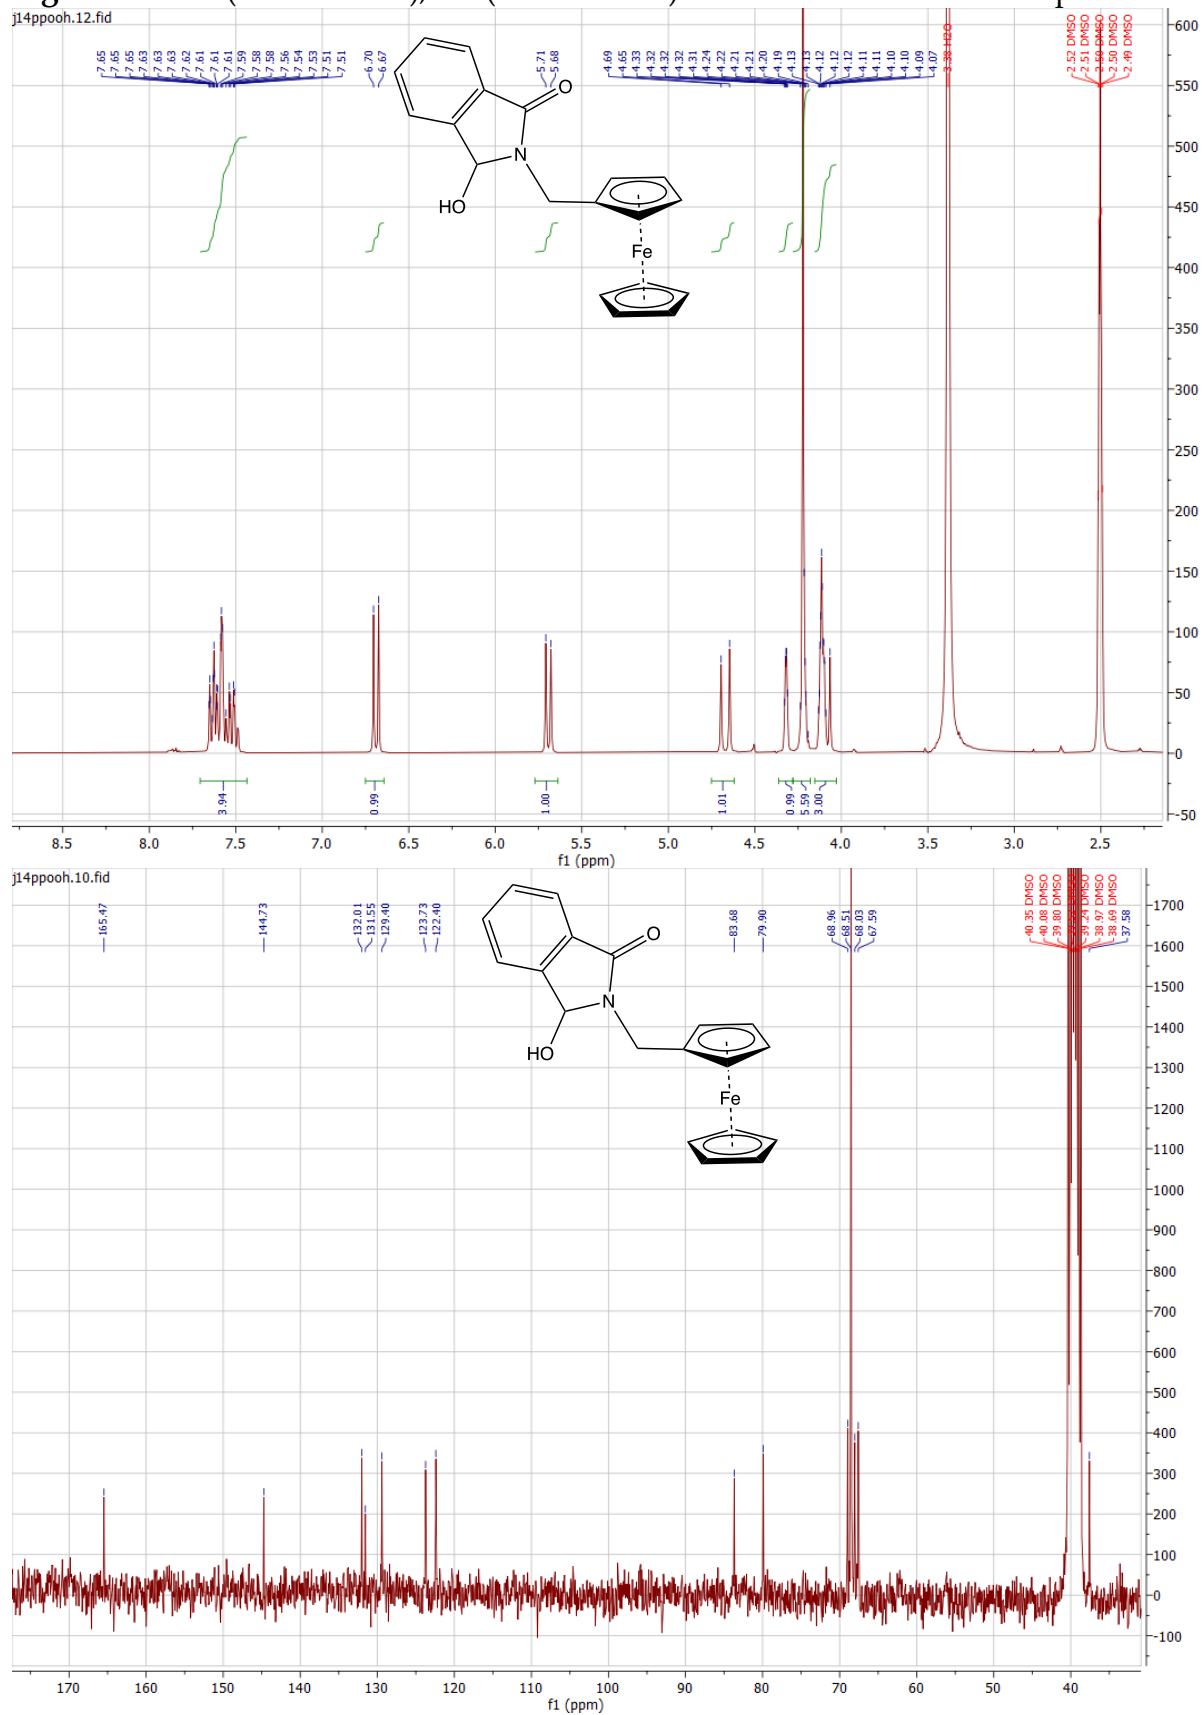

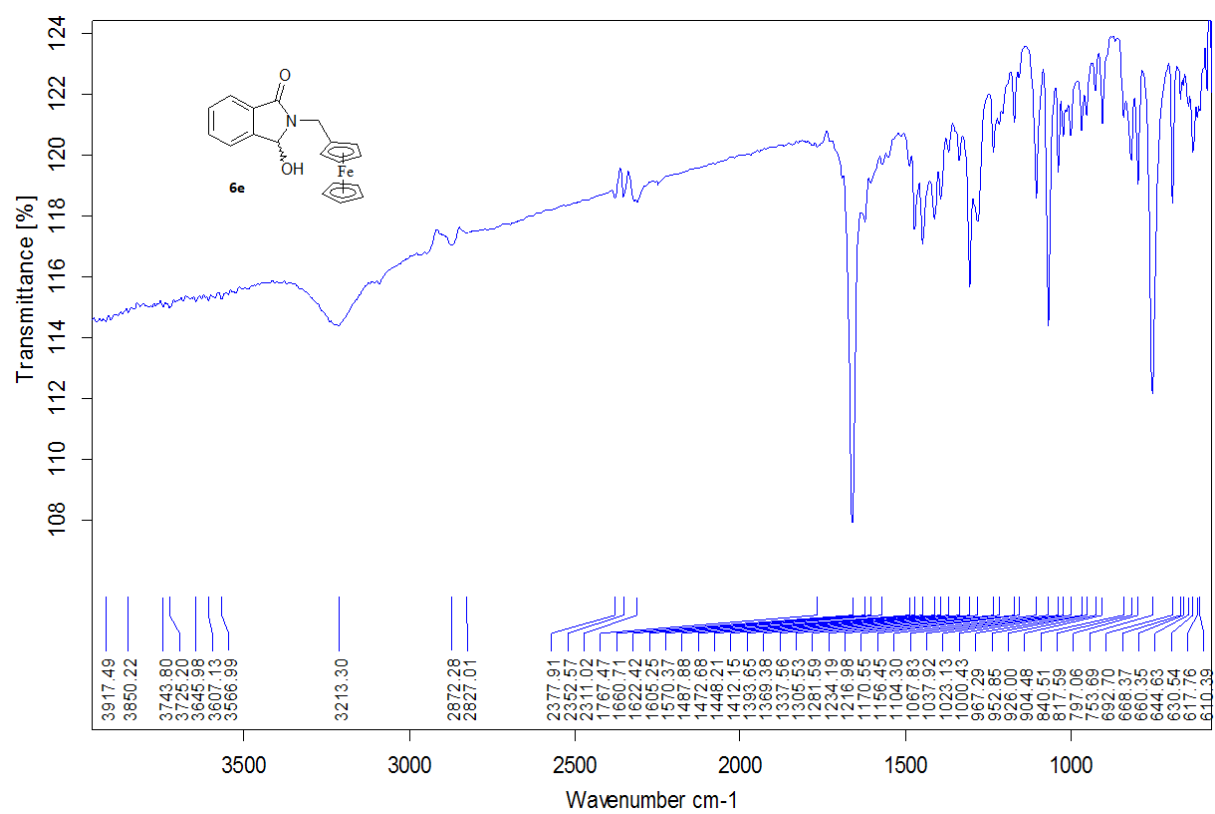

**1H NMR spectrum of compound 1 in DMSO-d<sub>6</sub>.**

**Chemical structure of compound 1:** O=C1c2ccccc2n(c1)CCc3ccc4c(c3)Fe(c5ccccc54)C6=CC=CC=C6

**Peak list (ppm):** 7.67, 7.66, 7.65, 7.64, 7.63, 7.62, 7.61, 7.60, 7.59, 7.58, 7.57, 7.56, 7.55, 7.53, 7.51, 7.50, 6.63, 6.62, 6.61, 6.60, 6.59, 6.58, 6.57, 6.56, 6.55, 6.54, 6.53, 6.52, 6.51, 6.50, 6.49, 6.48, 6.47, 6.46, 6.45, 6.44, 6.43, 6.42, 6.41, 6.40, 6.39, 6.38, 6.37, 6.36, 6.35, 6.34, 6.33, 6.32, 6.31, 6.30, 6.29, 6.28, 6.27, 6.26, 6.25, 6.24, 6.23, 6.22, 6.21, 6.20, 6.19, 6.18, 6.17, 6.16, 6.15, 6.14, 6.13, 6.12, 6.11, 6.10, 6.09, 6.08, 6.07, 6.06, 6.05, 6.04, 6.03, 6.02, 6.01, 6.00, 5.99, 5.98, 5.97, 5.96, 5.95, 5.94, 5.93, 5.92, 5.91, 5.90, 5.89, 5.88, 5.87, 5.86, 5.85, 5.84, 5.83, 5.82, 5.81, 5.80, 5.79, 5.78, 5.77, 5.76, 5.75, 5.74, 5.73, 5.72, 5.71, 5.70, 5.69, 5.68, 5.67, 5.66, 5.65, 5.64, 5.63, 5.62, 5.61, 5.60, 5.59, 5.58, 5.57, 5.56, 5.55, 5.54, 5.53, 5.52, 5.51, 5.50, 5.49, 5.48, 5.47, 5.46, 5.45, 5.44, 5.43, 5.42, 5.41, 5.40, 5.39, 5.38, 5.37, 5.36, 5.35, 5.34, 5.33, 5.32, 5.31, 5.30, 5.29, 5.28, 5.27, 5.26, 5.25, 5.24, 5.23, 5.22, 5.21, 5.20, 5.19, 5.18, 5.17, 5.16, 5.15, 5.14, 5.13, 5.12, 5.11, 5.10, 5.09, 5.08, 5.07, 5.06, 5.05, 5.04, 5.03, 5.02, 5.01, 5.00, 4.99, 4.98, 4.97, 4.96, 4.95, 4.94, 4.93, 4.92, 4.91, 4.90, 4.89, 4.88, 4.87, 4.86, 4.85, 4.84, 4.83, 4.82, 4.81, 4.80, 4.79, 4.78, 4.77, 4.76, 4.75, 4.74, 4.73, 4.72, 4.71, 4.70, 4.69, 4.68, 4.67, 4.66, 4.65, 4.64, 4.63, 4.62, 4.61, 4.60, 4.59, 4.58, 4.57, 4.56, 4.55, 4.54, 4.53, 4.52, 4.51, 4.50, 4.49, 4.48, 4.47, 4.46, 4.45, 4.44, 4.43, 4.42, 4.41, 4.40, 4.39, 4.38, 4.37, 4.36, 4.35, 4.34, 4.33, 4.32, 4.31, 4.30, 4.29, 4.28, 4.27, 4.26, 4.25, 4.24, 4.23, 4.22, 4.21, 4.20, 4.19, 4.18, 4.17, 4.16, 4.15, 4.14, 4.13, 4.12, 4.11, 4.10, 4.09, 4.08, 4.07, 4.06, 4.05, 4.04, 4.03, 4.02, 4.01, 4.00, 3.99, 3.98, 3.97, 3.96, 3.95, 3.94, 3.93, 3.92, 3.91, 3.90, 3.89, 3.88, 3.87, 3.86, 3.85, 3.84, 3.83, 3.82, 3.81, 3.80, 3.79, 3.78, 3.77, 3.76, 3.75, 3.74, 3.73, 3.72, 3.71, 3.70, 3.69, 3.68, 3.67, 3.66, 3.65, 3.64, 3.63, 3.62, 3.61, 3.60, 3.59, 3.58, 3.57, 3.56, 3.55, 3.54, 3.53, 3.52, 3.51, 3.50, 3.49, 3.48, 3.47, 3.46, 3.45, 3.44, 3.43, 3.42, 3.41, 3.40, 3.39, 3.38, 3.37, 3.36, 3.35, 3.34, 3.33, 3.32, 3.31, 3.30, 3.29, 3.28, 3.27, 3.26, 3.25, 3.24, 3.23, 3.22, 3.21, 3.20, 3.19, 3.18, 3.17, 3.16, 3.15, 3.14, 3.13, 3.12, 3.11, 3.10, 3.09, 3.08, 3.07, 3.06, 3.05, 3.04, 3.03, 3.02, 3.01, 3.00, 2.99, 2.98, 2.97, 2.96, 2.95, 2.94, 2.93, 2.92, 2.91, 2.90, 2.89, 2.88, 2.87, 2.86, 2.85, 2.84, 2.83, 2.82, 2.81, 2.80, 2.79, 2.78, 2.77, 2.76, 2.75, 2.74, 2.73, 2.72, 2.71, 2.70, 2.69, 2.68, 2.67, 2.66, 2.65, 2.64, 2.63, 2.62, 2.61, 2.60, 2.59, 2.58, 2.57, 2.56, 2.55, 2.54, 2.53, 2.52, 2.51, 2.50, 2.49, 2.48, 2.47, 2.46, 2.45, 2.44, 2.43, 2.42, 2.41, 2.40, 2.39, 2.38, 2.37, 2.36, 2.35, 2.34, 2.33, 2.32, 2.31, 2.30, 2.29, 2.28, 2.27, 2.26, 2.25, 2.24, 2.23, 2.22, 2.21, 2.20, 2.19, 2.18, 2.17, 2.16, 2.15, 2.14, 2.13, 2.12, 2.11, 2.10, 2.09, 2.08, 2.07, 2.06, 2.05, 2.04, 2.03, 2.02, 2.01, 2.00, 1.99, 1.98, 1.97, 1.96, 1.95, 1.94, 1.93, 1.92, 1.91, 1.90, 1.89, 1.88, 1.87, 1.86, 1.85, 1.84, 1.83, 1.82, 1.81, 1.80, 1.79, 1.78, 1.77, 1.76, 1.75, 1.74, 1.73, 1.72, 1.71, 1.70, 1.69, 1.68, 1.67, 1.66, 1.65, 1.64, 1.63, 1.62, 1.61, 1.60, 1.59, 1.58, 1.57, 1.56, 1.55, 1.54, 1.53, 1.52, 1.51, 1.50, 1.49, 1.48, 1.47, 1.46, 1.45, 1.44, 1.43, 1.42, 1.41, 1.40, 1.39, 1.38, 1.37, 1.36, 1.35, 1.34, 1.33, 1.32, 1.31, 1.30, 1.29, 1.28, 1.27, 1.26, 1.25, 1.24, 1.23, 1.22, 1.21, 1.20, 1.19, 1.18, 1.17, 1.16, 1.15, 1.14, 1.13, 1.12, 1.11, 1.10, 1.09, 1.08, 1.07, 1.06, 1.05, 1.04, 1.03, 1.02, 1.01, 1.00, 0.99, 0.98, 0.97, 0.96, 0.95, 0.94, 0.93, 0.92, 0.91, 0.90, 0.89, 0.88, 0.87, 0.86, 0.85, 0.84, 0.83, 0.82, 0.81, 0.80, 0.79, 0.78, 0.77, 0.76, 0.75, 0.74, 0.73, 0.72, 0.71, 0.70, 0.69, 0.68, 0.67, 0.66, 0.65, 0.64, 0.63, 0.62, 0.61, 0.60, 0.59, 0.58, 0.57, 0.56, 0.55, 0.54, 0.53, 0.52, 0.51, 0.50, 0.49, 0.48, 0.47, 0.46, 0.45, 0.44, 0.43, 0.42, 0

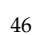

# Single Mass Analysis

Tolerance = 5.0 PPM / DBE: min = -1.5, max = 100.0

Element prediction: Off

Number of isotope peaks used for i-FIT = 9

Monoisotopic Mass, Odd Electron Ions

152 formula(e) evaluated with 1 results within limits (all results (up to 1000) for each mass)

Elements Used:

C: 1-150 H: 1-150 N: 0-3 O: 0-10 Fe: 1-1

19-Jun-2013 2:5:3

ENSCP\_P677 37 (0.932) Cm (31.44)

ACN

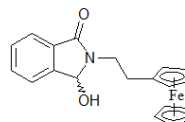

LCT Premier XE KE483  
1: TOF MS ES+  
6.17e+004

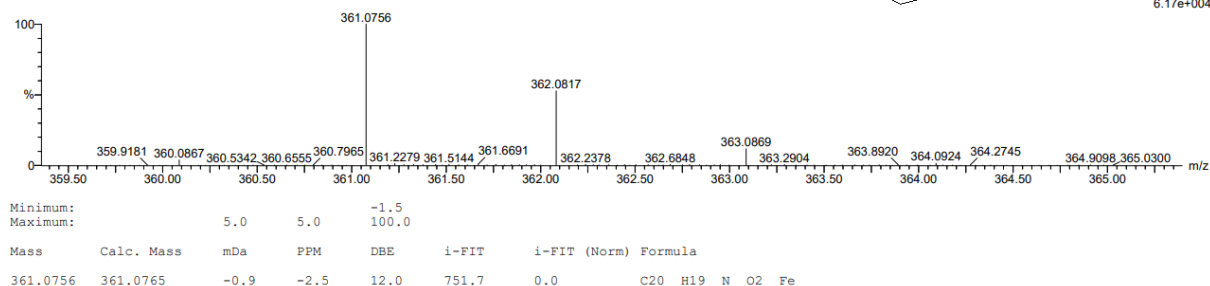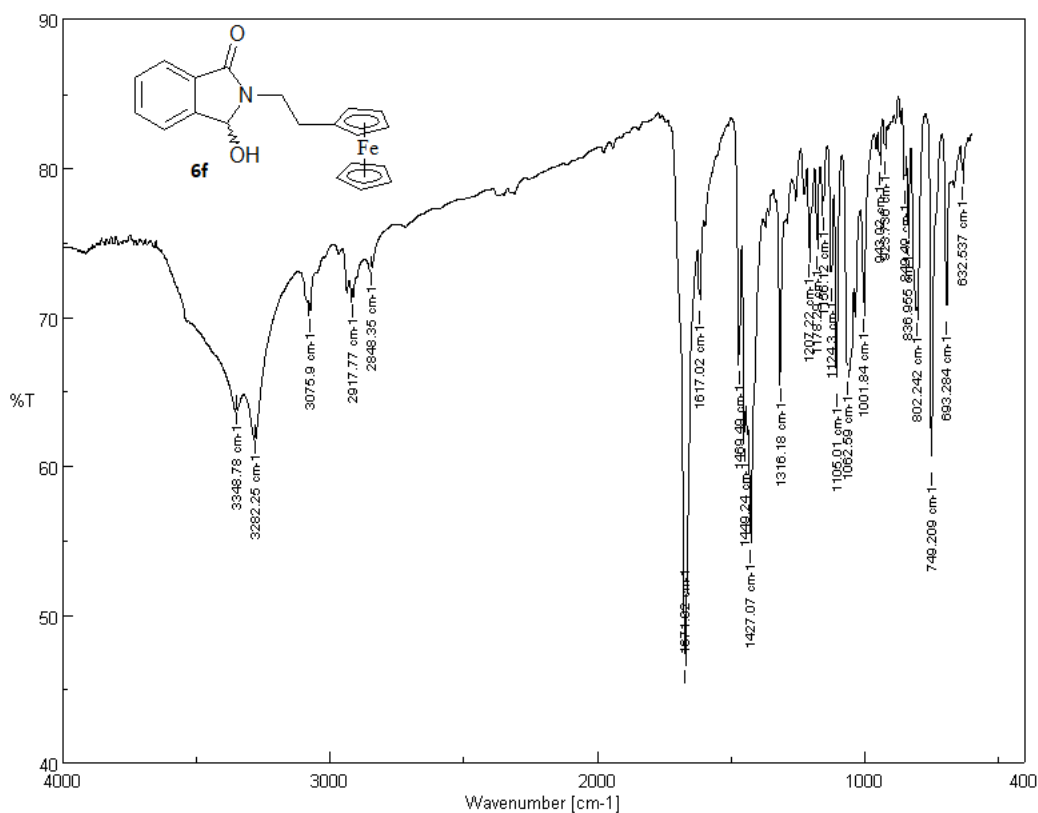

**Figure S24:**  $^1\text{H}$  (in  $\text{DMSO-d}_6$ ),  $^{13}\text{C}$  (in  $\text{DMSO-d}_6$ ) NMR, HR-MS and IR data for compound **6g**

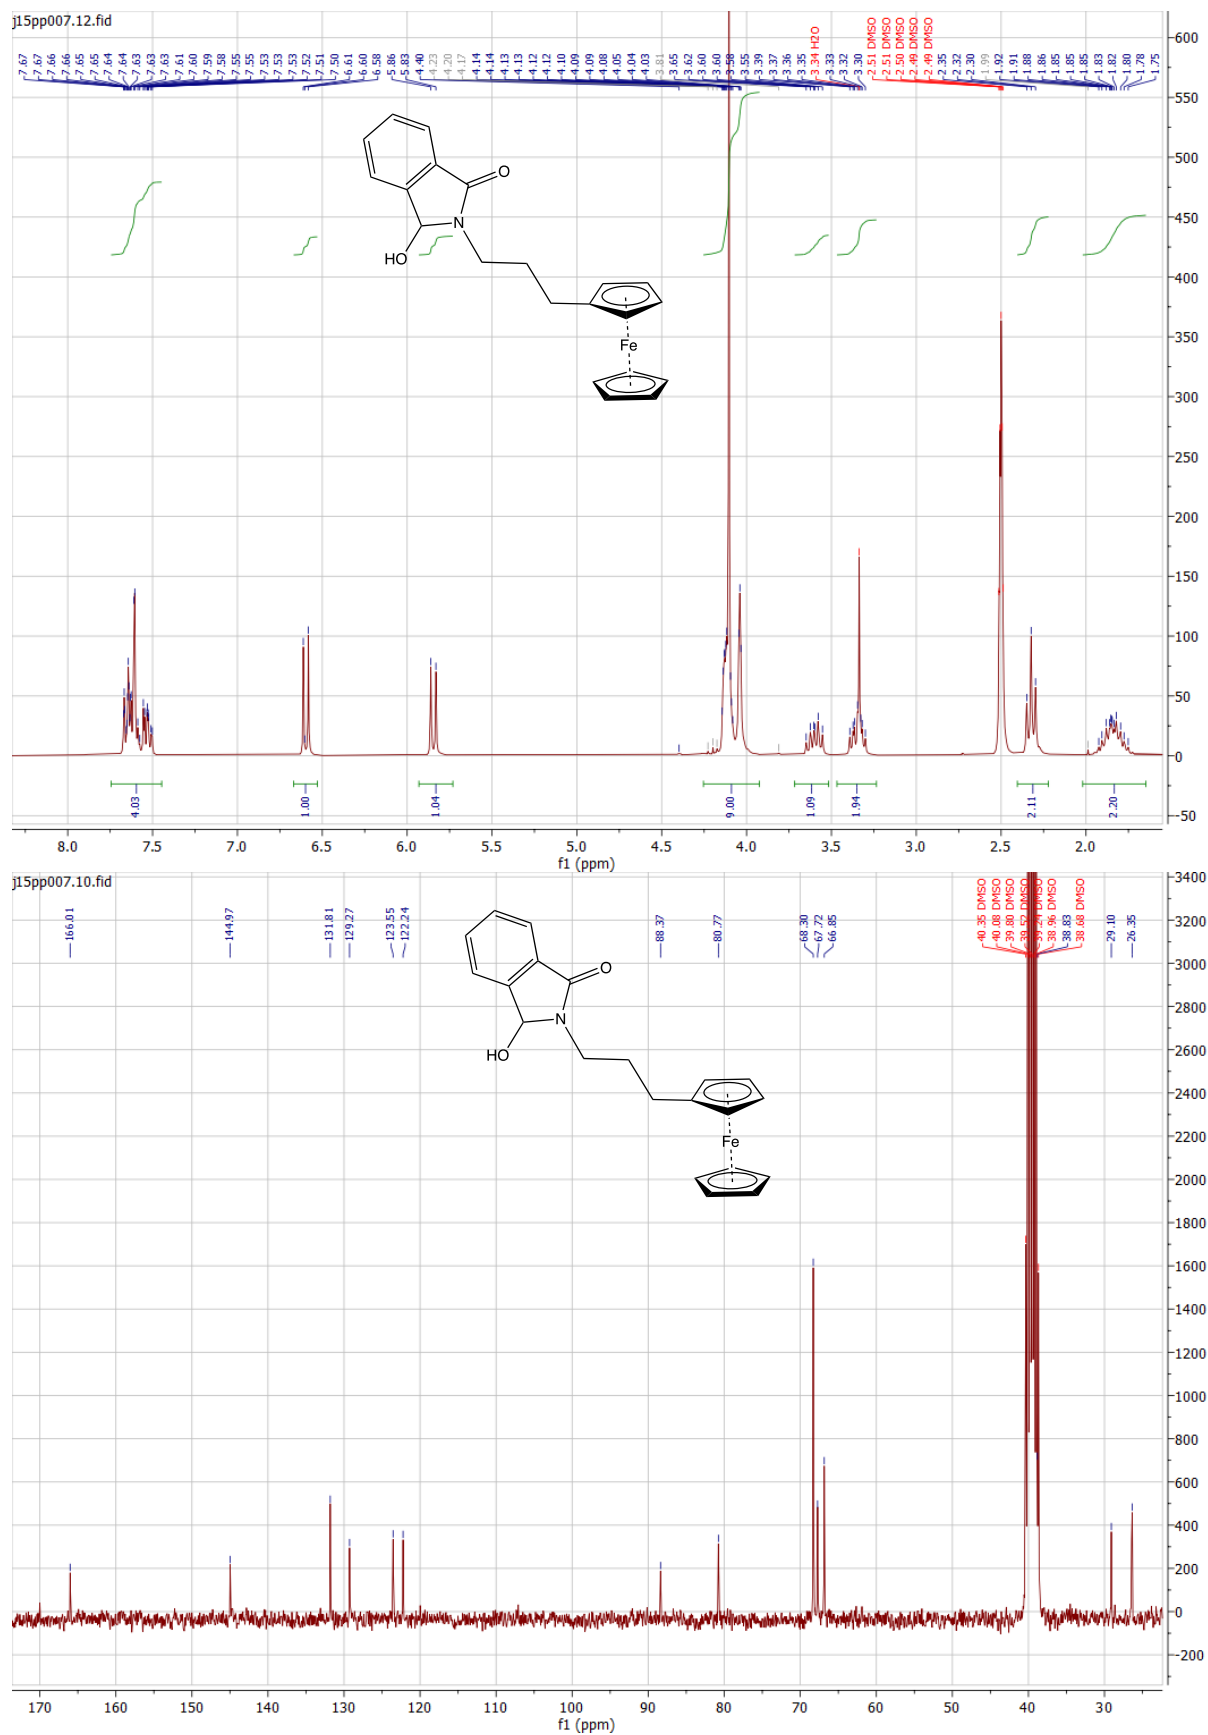

# Single Mass Analysis

Tolerance = 5.0 PPM / DBE: min = -1.5, max = 100.0

Element prediction: Off

Number of isotope peaks used for i-FIT = 9

Monoisotopic Mass, Odd Electron Ions

160 formula(e) evaluated with 2 results within limits (all results (up to 1000) for each mass)

Elements Used:

C: 1-150 H: 1-150 N: 0-3 O: 0-10 Fe: 1-1

19-Jun-2013 3:00:1

ENSCP\_P678 49 (1.206) Cm (48:58)

ACN

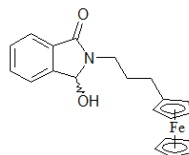

LCT Premier XE KE483  
1: TOF MS ES+  
1.26e+004

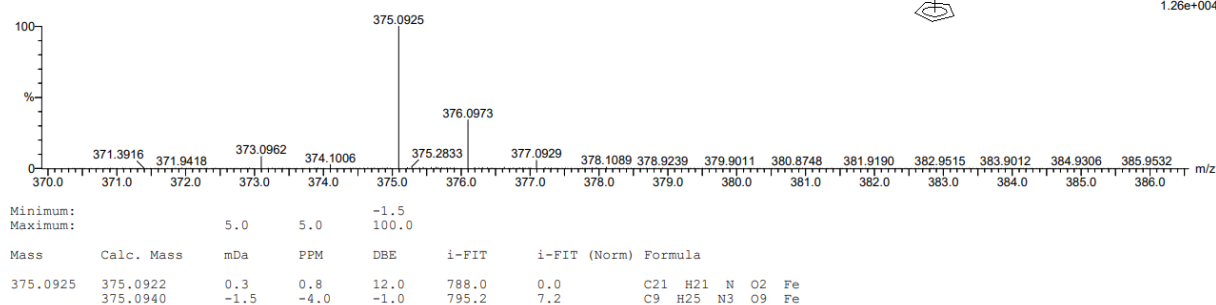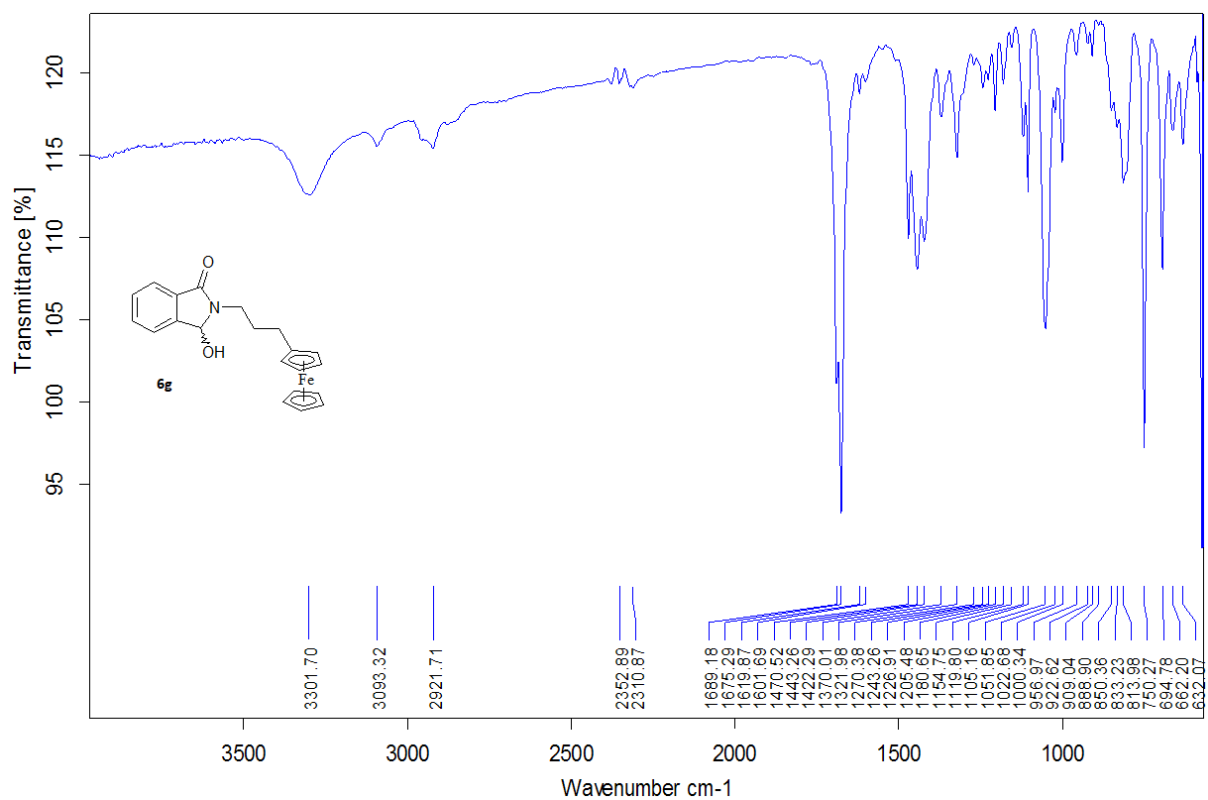



**Figure S25:**  $^1\text{H}$  (in  $\text{DMSO-d}_6$ ) and  $^{13}\text{C}$  (in  $\text{DMSO-d}_6$ ) NMR and HR-MS data for compound **6h**

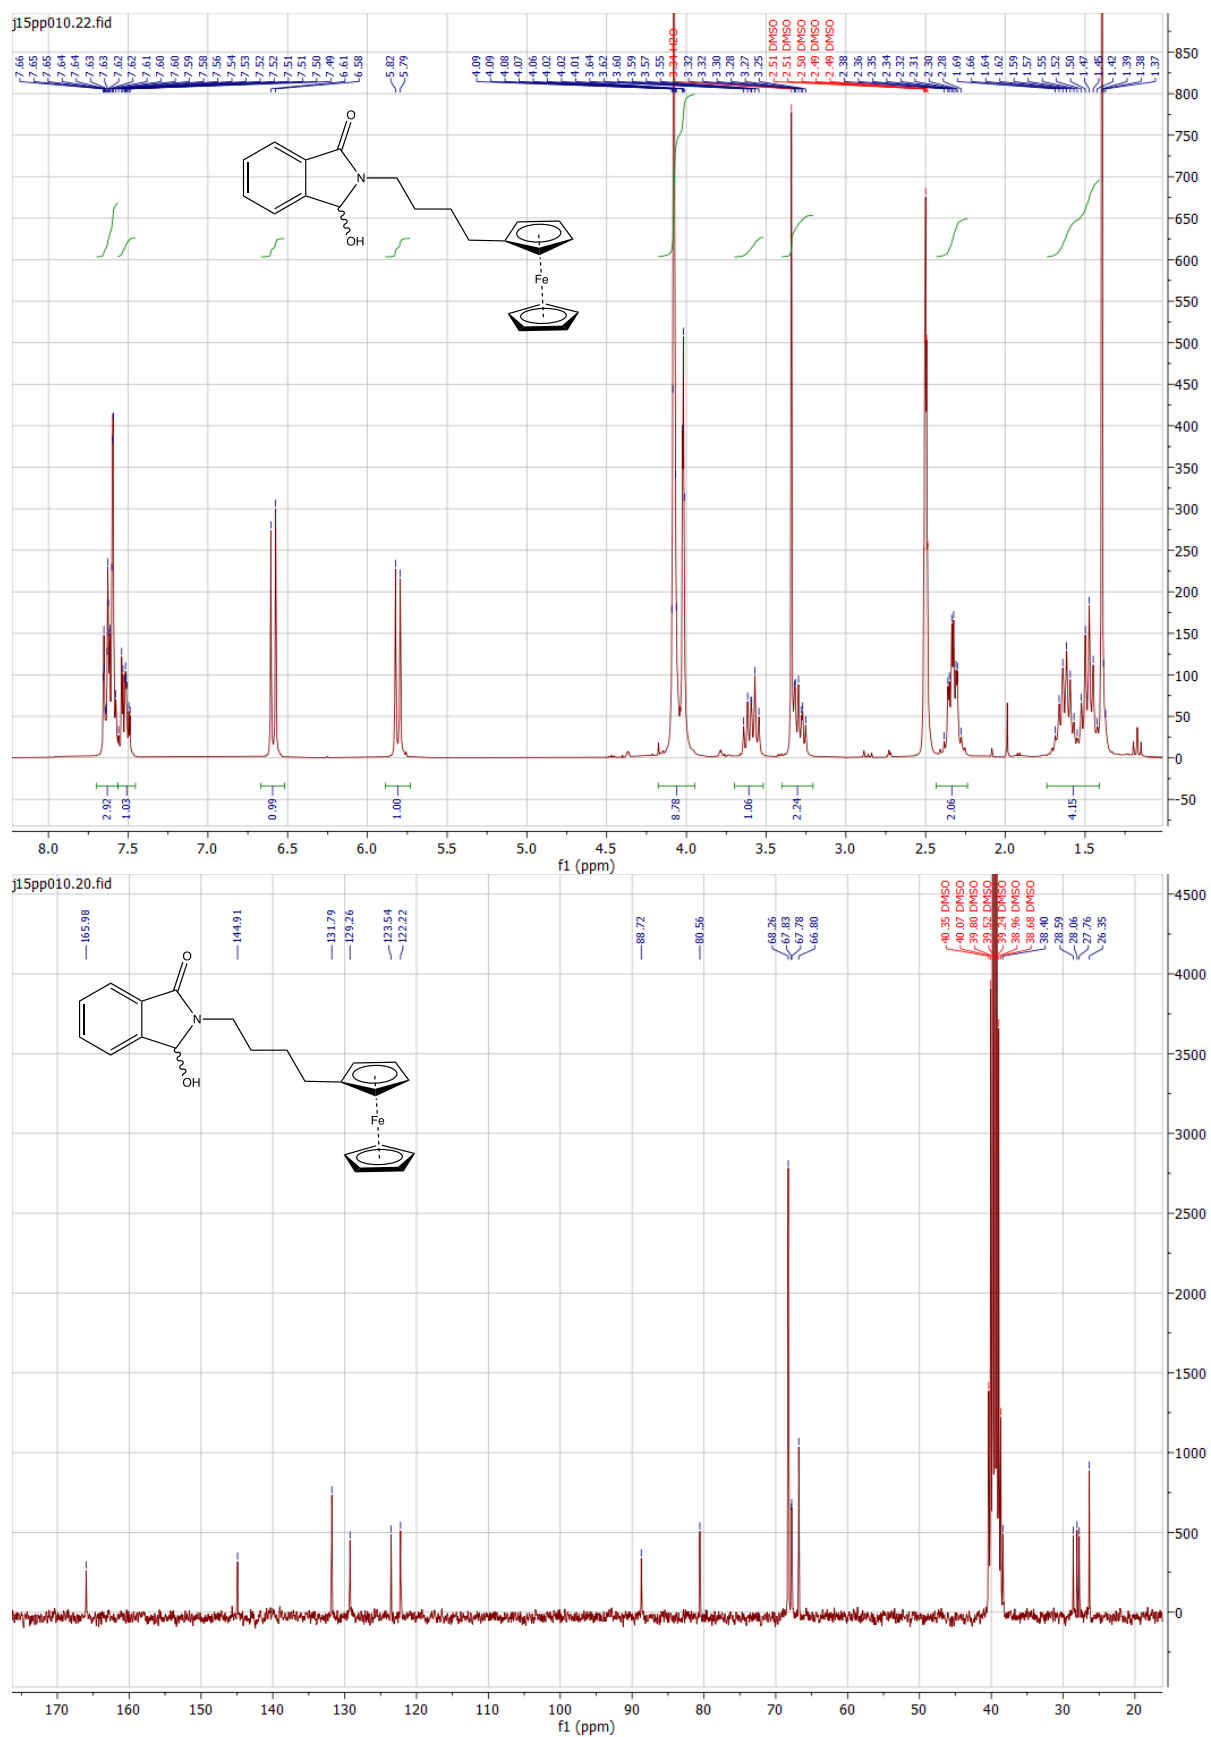

### Single Mass Analysis

Tolerance = 5.0 PPM / DBE: min = -1.5, max = 100.0

Element prediction: Off

Number of isotope peaks used for i-FIT = 9

Monoisotopic Mass, Odd Electron Ions

412 formula(e) evaluated with 3 results within limits (all results (up to 1000) for each mass)

Elements Used:

C: 0-100 H: 1-120 N: 0-10 O: 0-10 Fe: 1-1

06-Sep-2013 5:7:4

ENSCP\_P679 29 (0.753) Cm (29:39)

MeOH

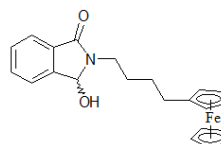

LCT Premier XE KE483  
1: TOF MS ES+  
2.55e+004

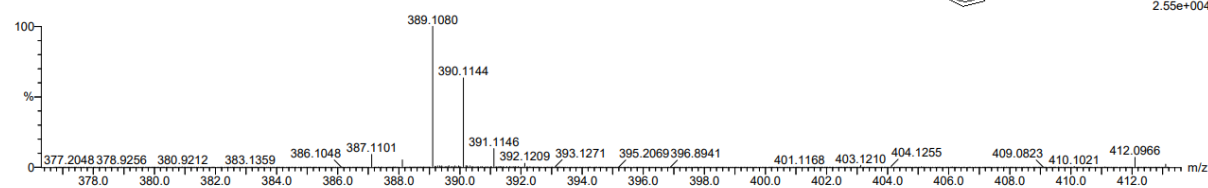

Minimum:

Maximum: 5.0 5.0 -1.5

Mass Calc. Mass mDa PPM DBE i-FIT i-FIT (Norm) Formula

|          |          |      |      |      |        |     |                  |
|----------|----------|------|------|------|--------|-----|------------------|
| 389.1080 | 389.1078 | 0.2  | 0.5  | 12.0 | 1020.1 | 0.0 | C22 H23 N O2 Fe  |
|          | 389.1097 | -1.7 | -4.4 | -1.0 | 1023.3 | 3.2 | C10 H27 N3 O9 Fe |
|          | 389.1070 | 1.0  | 2.6  | 0.0  | 1026.1 | 6.1 | C6 H23 N9 O7 Fe  |

**Figure S26:**  $^1\text{H}$  (in  $\text{DMSO-d}_6$ ),  $^{13}\text{C}$  (in  $\text{DMSO-d}_6$ ) NMR, HR-MS and IR data for compound **6i**

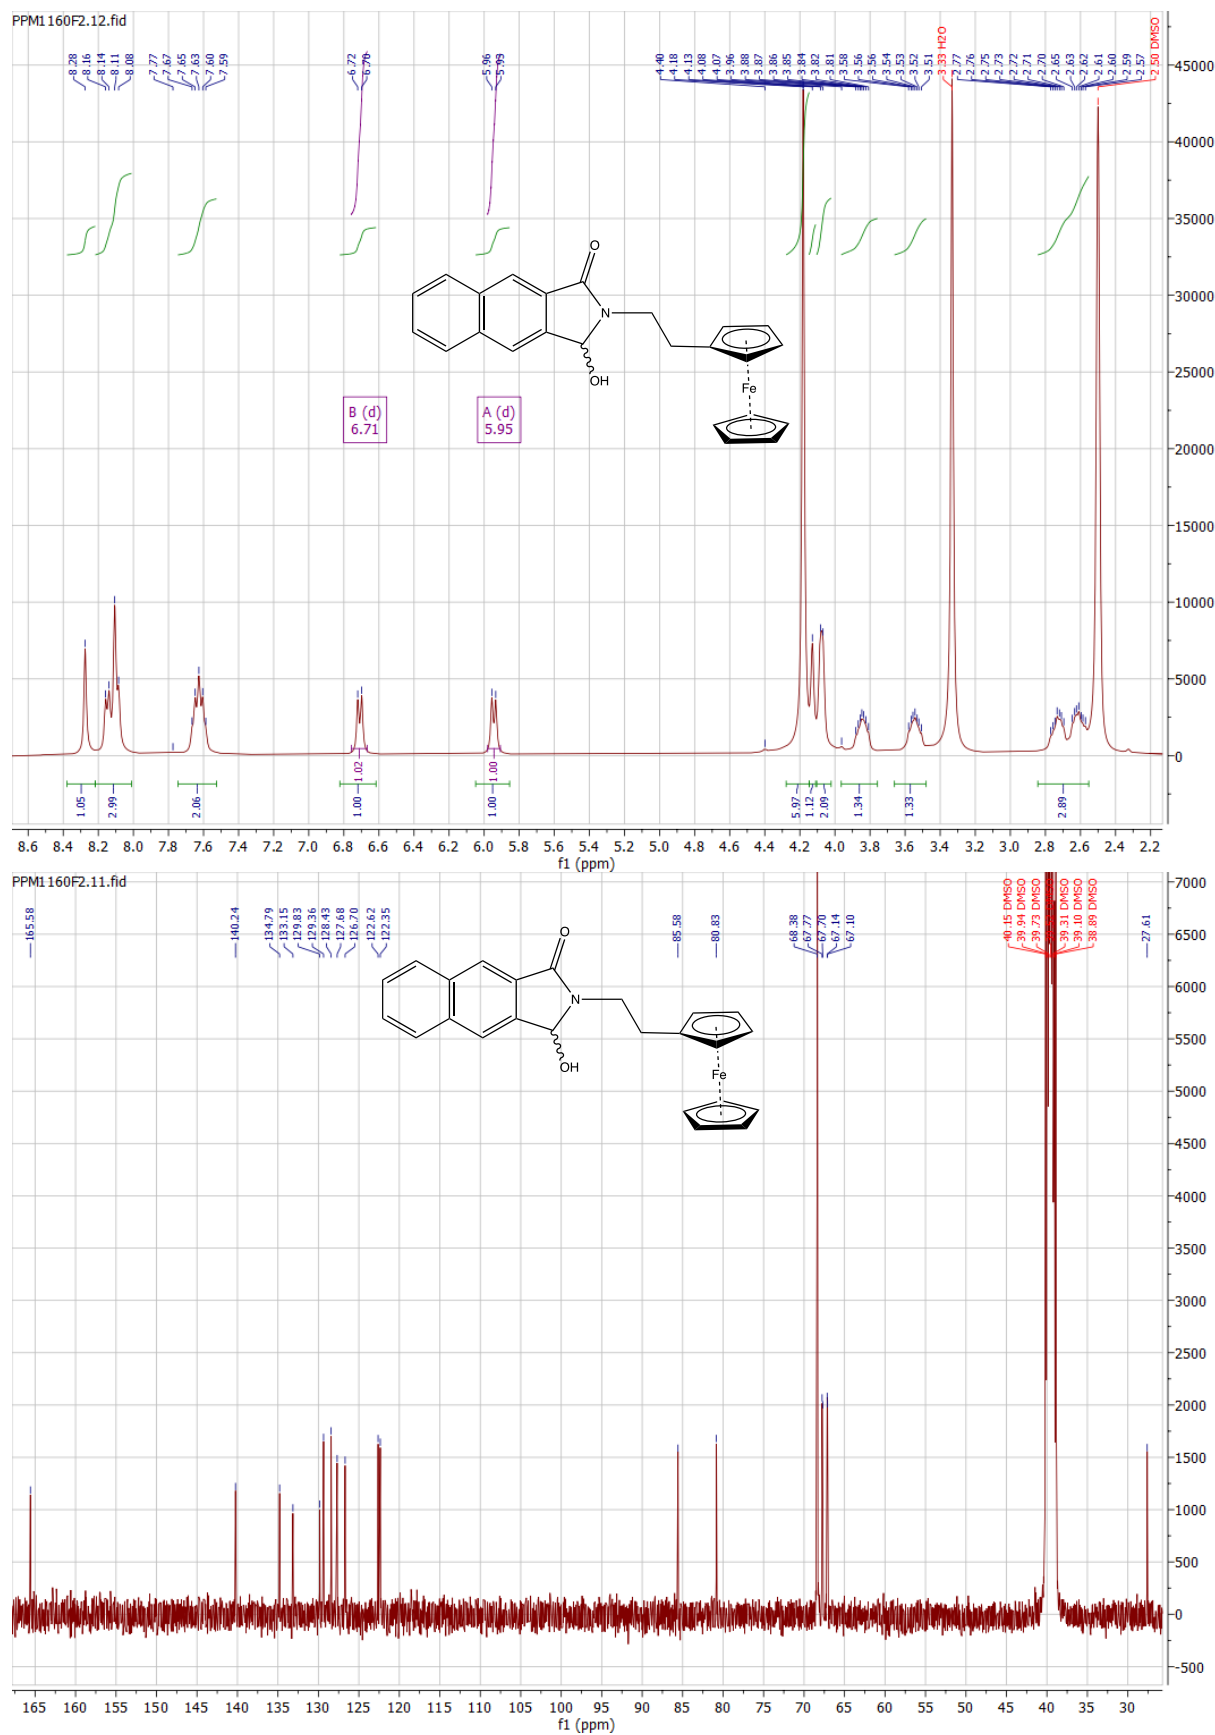

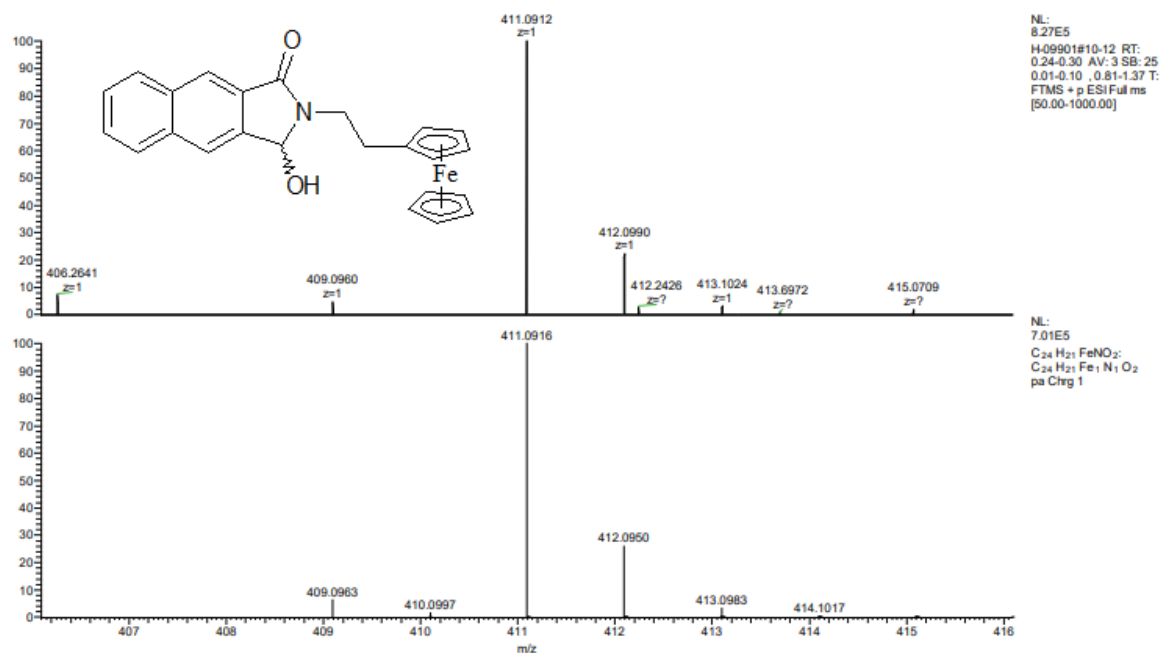

## Experimental/theoretical isotopic pattern MS spectrum

Error = -1.0 ppm; Relative Intensity (%) 100

HRMS (ESI) m/z: [M]<sup>+</sup> Calcd for C<sub>24</sub>H<sub>21</sub>FeNO<sub>2</sub> 411.0916 . Found 411.0912; (Error: -1.0 ppm).

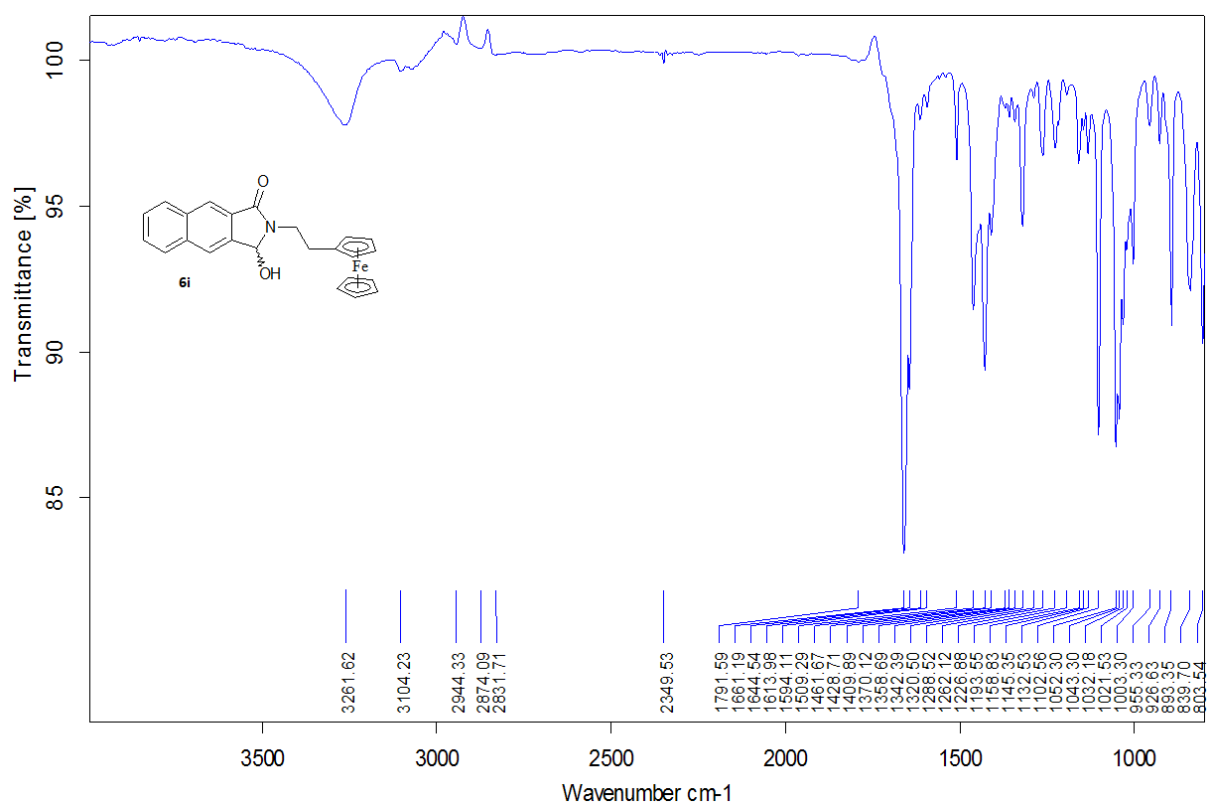

**Figure S27:**  $^1\text{H}$  (in  $\text{CDCl}_3$ ), COSY (in  $\text{CDCl}_3$ ) NMR data for compound **6j**

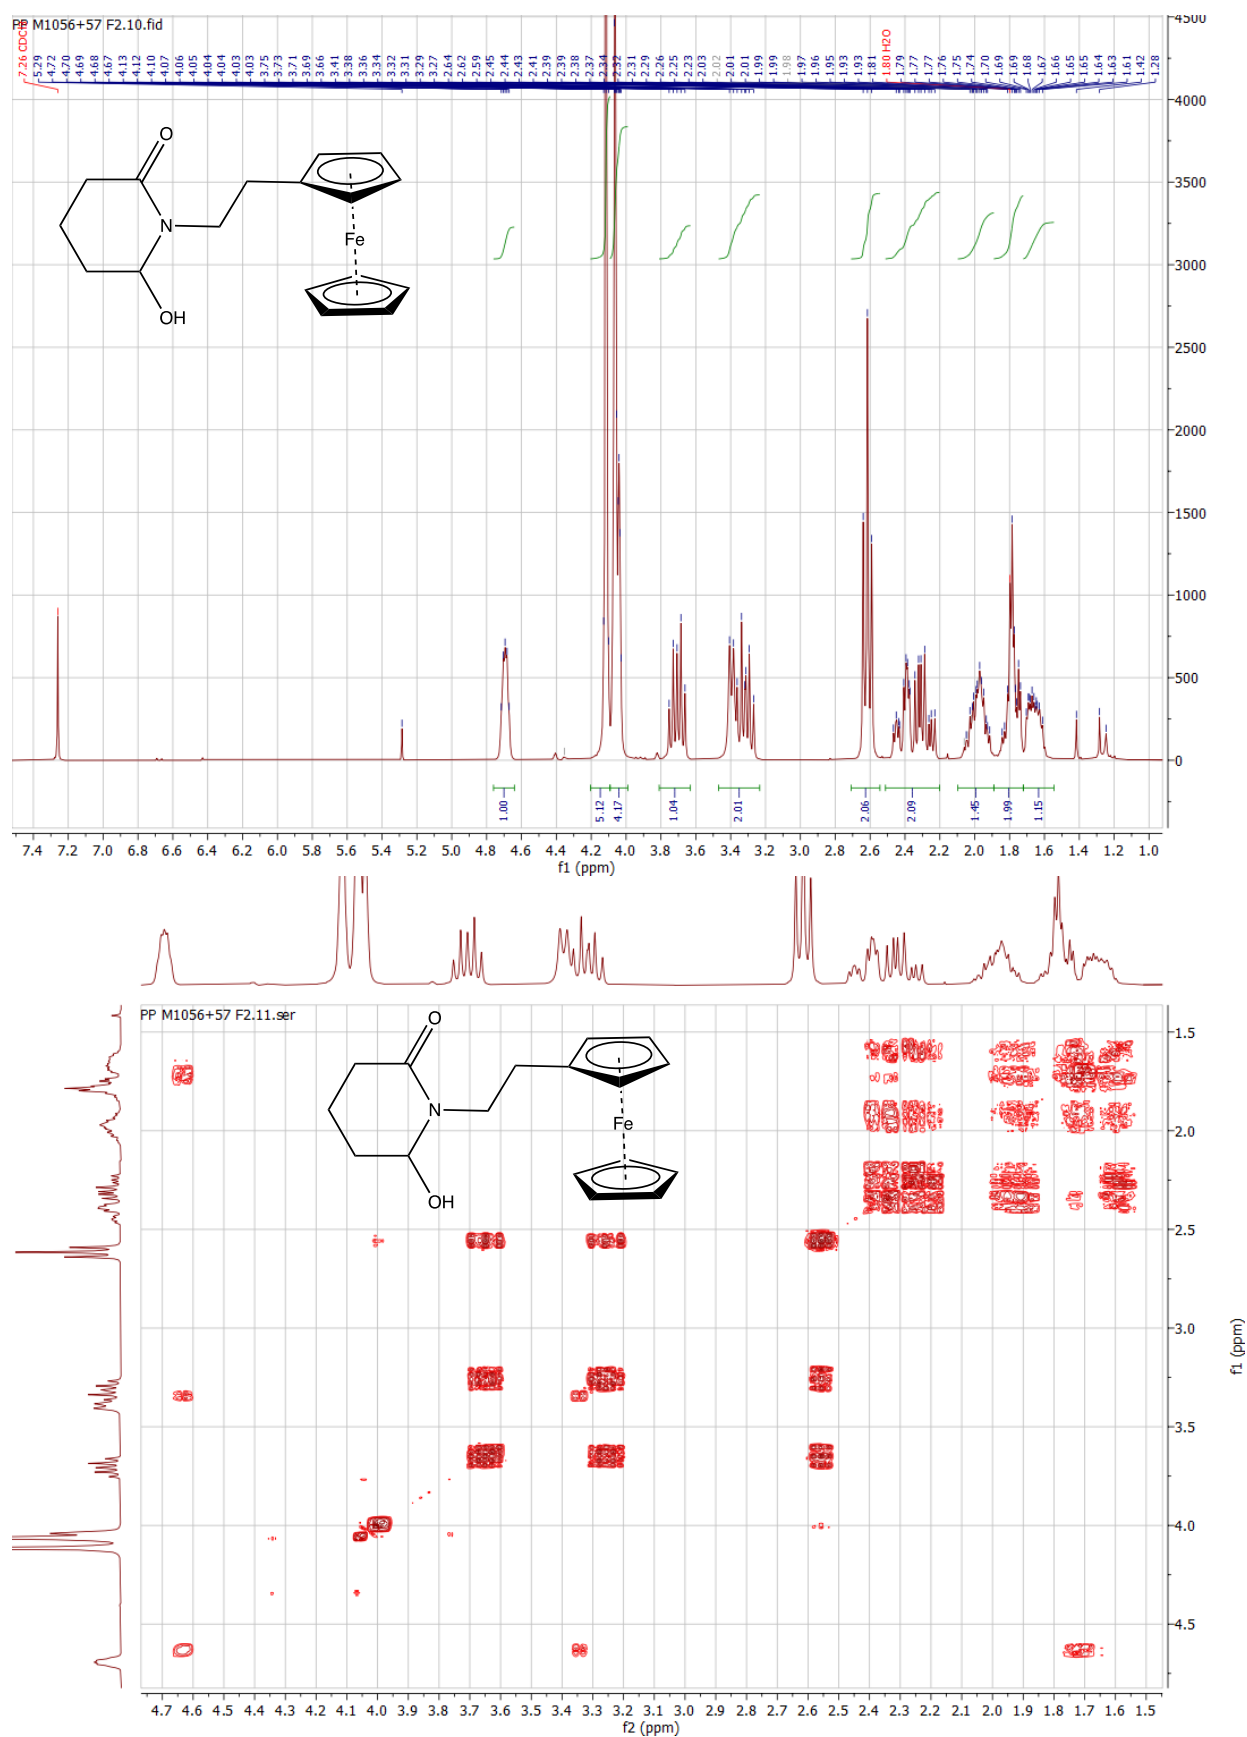

PP M1057 F3.10.fid

Chemical structure: OC(=O)CCCCNCc1ccc2c(c1)[Fe]3C=CC=CC=3C2

<sup>1</sup>H NMR spectrum (CDCl<sub>3</sub>) showing peaks from 1.4 to 7.5 ppm. Key features include a broad peak at 7.26 ppm (NH), a multiplet at 5.66 ppm (aromatic), a sharp peak at 4.14 ppm (CH<sub>2</sub>), and a complex multiplet between 1.4 and 2.6 ppm (aliphatic). Integration values are provided for several regions: 1.00, 10.19, 2.33, 2.21, 2.30, 1.00, 1.07, 3.31, and 2.44. Peak counts are also indicated: D (t) 3.64, C (q) 3.37, B (t) 2.53, and A (t) 2.20.

PP M1046 F9.10.fid

Chemical structure: OC(=O)CCCCNCc1ccc2c(c1)[Fe]3C=CC=CC=3C2

<sup>13</sup>C NMR spectrum (CDCl<sub>3</sub>) showing peaks from 20 to 175 ppm. Key features include a sharp peak at 173.20 ppm (C=O), a cluster of peaks between 70 and 80 ppm (CDCl<sub>3</sub> solvent), and several peaks in the aliphatic region (40-60 ppm). Peak labels include 173.20, 85.73, 77.58 CDCl<sub>3</sub>, 77.26 CDCl<sub>3</sub>, 76.74 CDCl<sub>3</sub>, 68.97, 68.54, 67.91, 62.14, 40.71, 36.20, 32.10, 29.80, and 21.78.

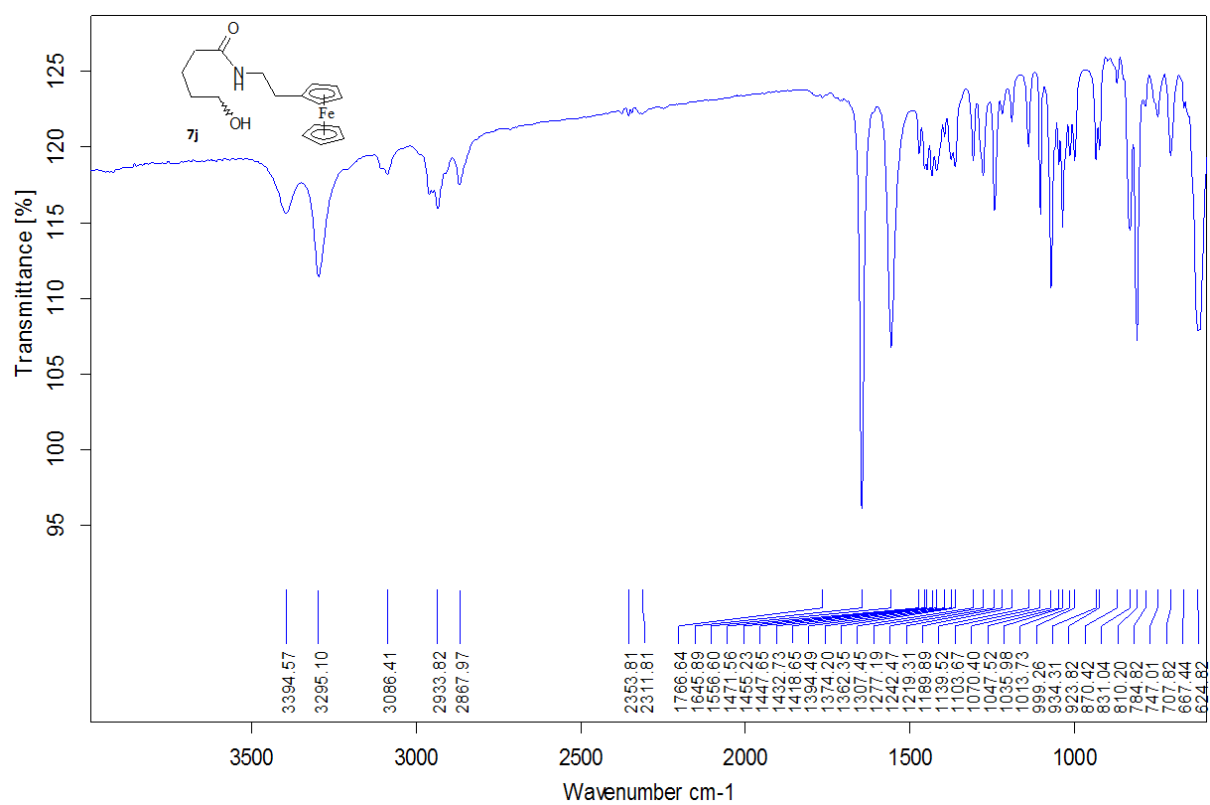

**Figure S29:**  $^1\text{H}$  (in  $\text{CDCl}_3$ ),  $^{13}\text{C}$  (in  $\text{CDCl}_3$ ), COSY (in  $\text{CDCl}_3$ ), HMQC (in  $\text{CDCl}_3$ ) NMR and IR data for compound **8j**

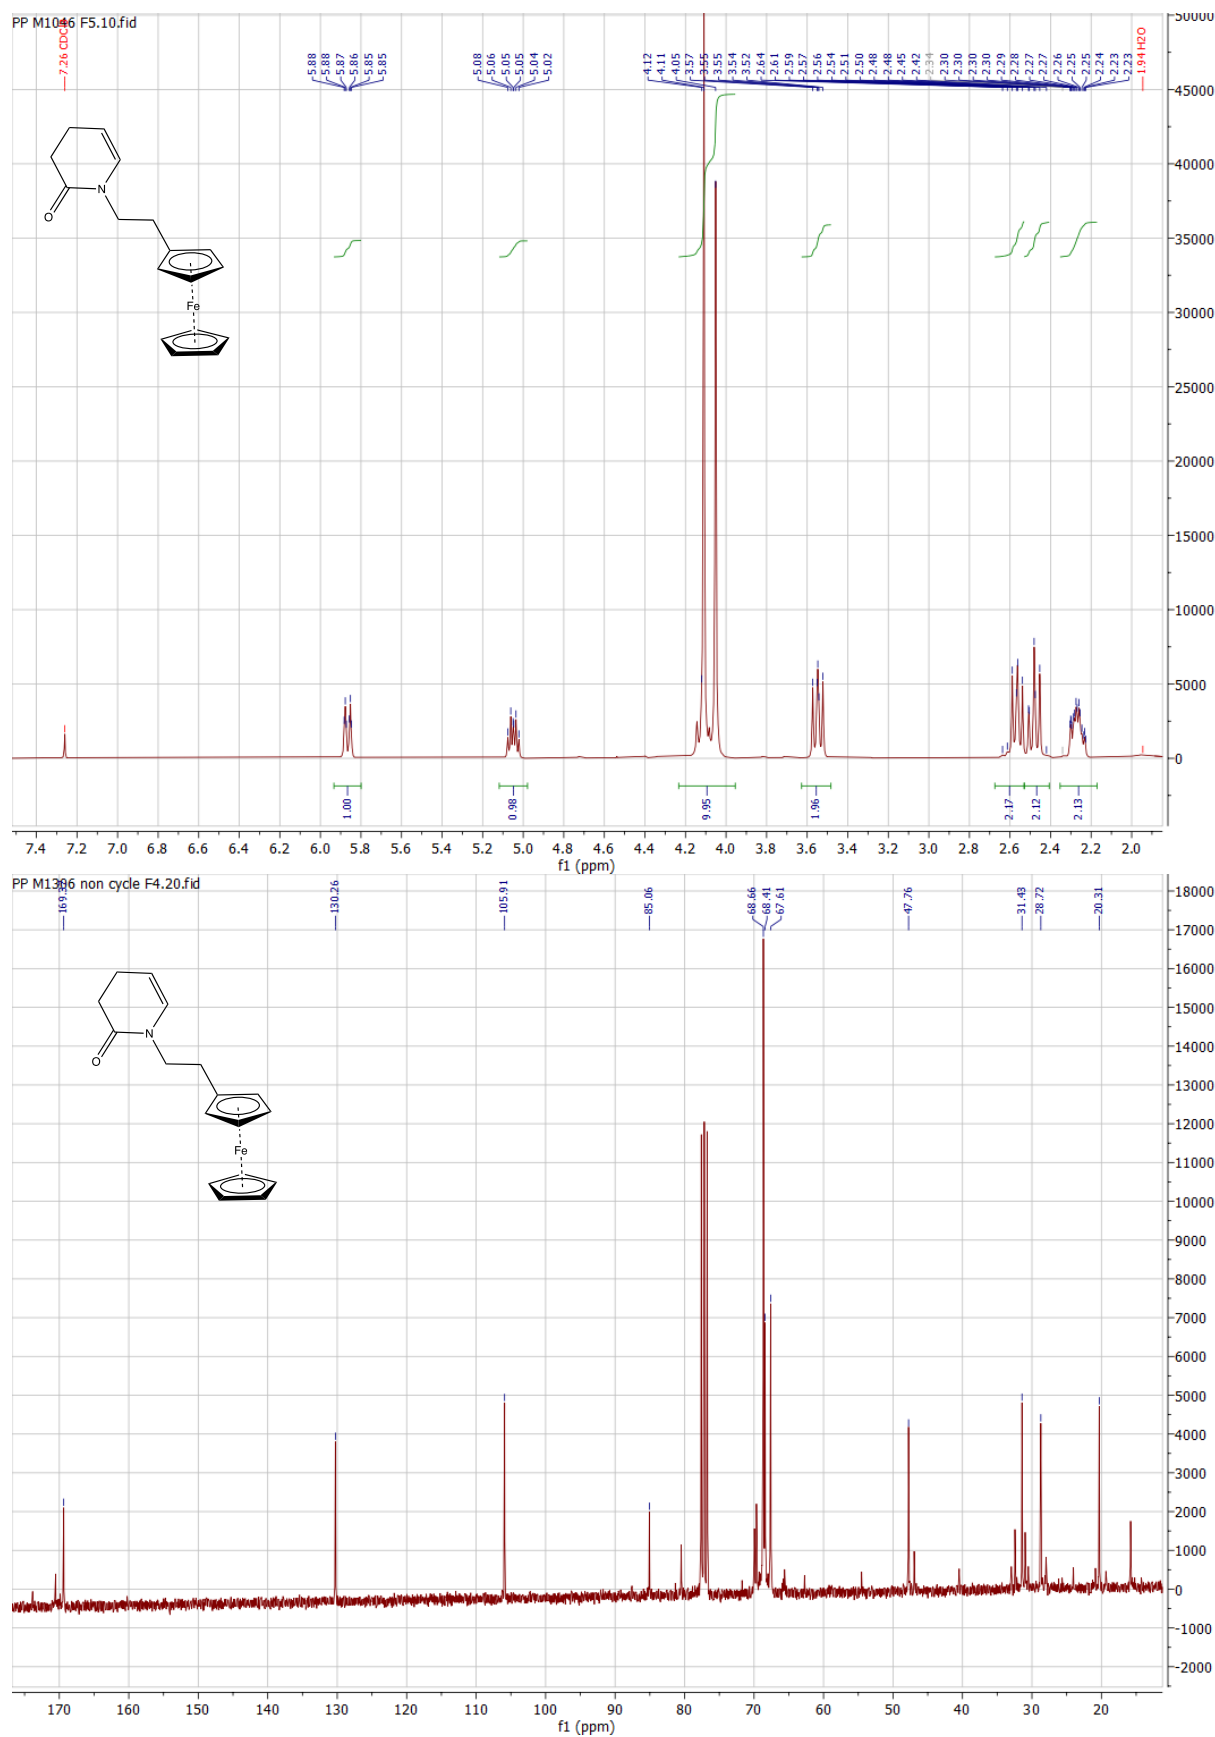



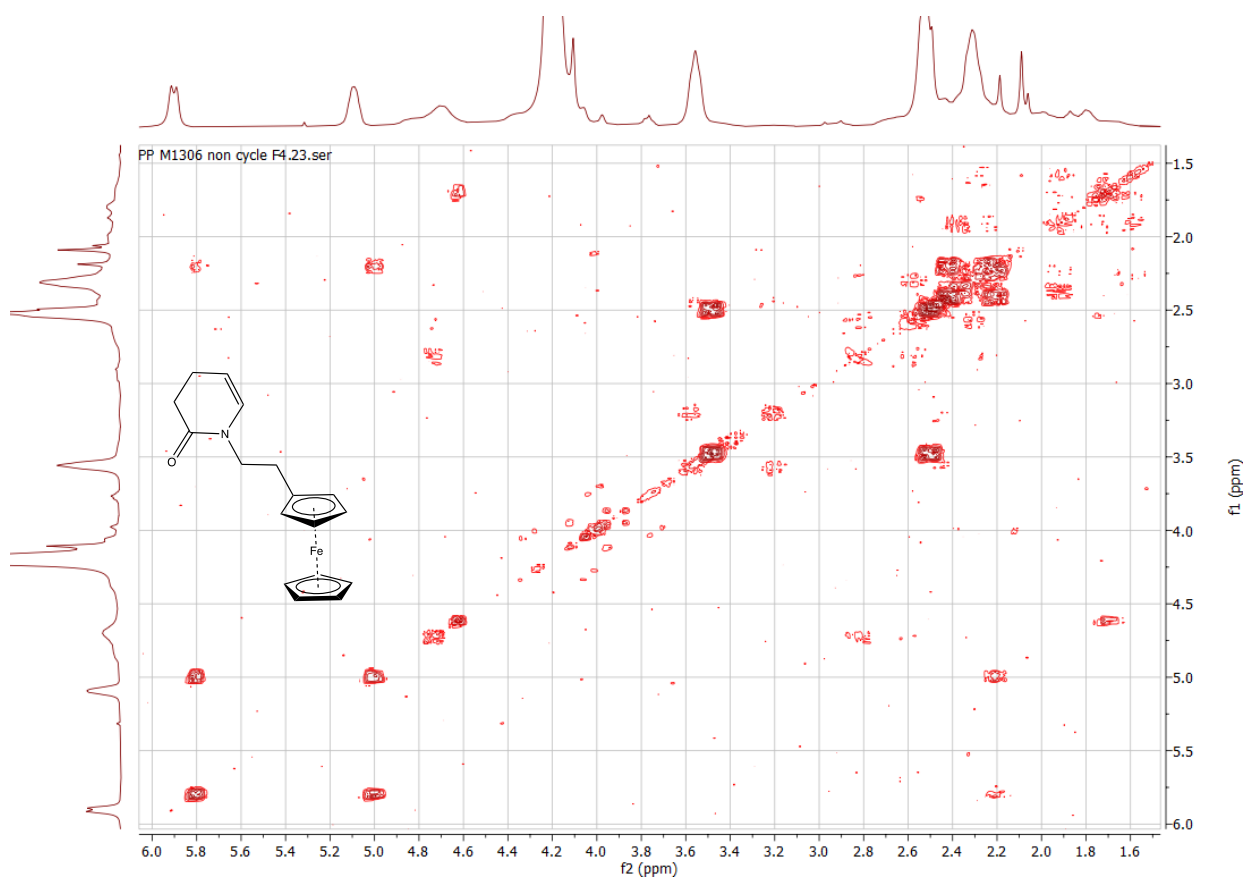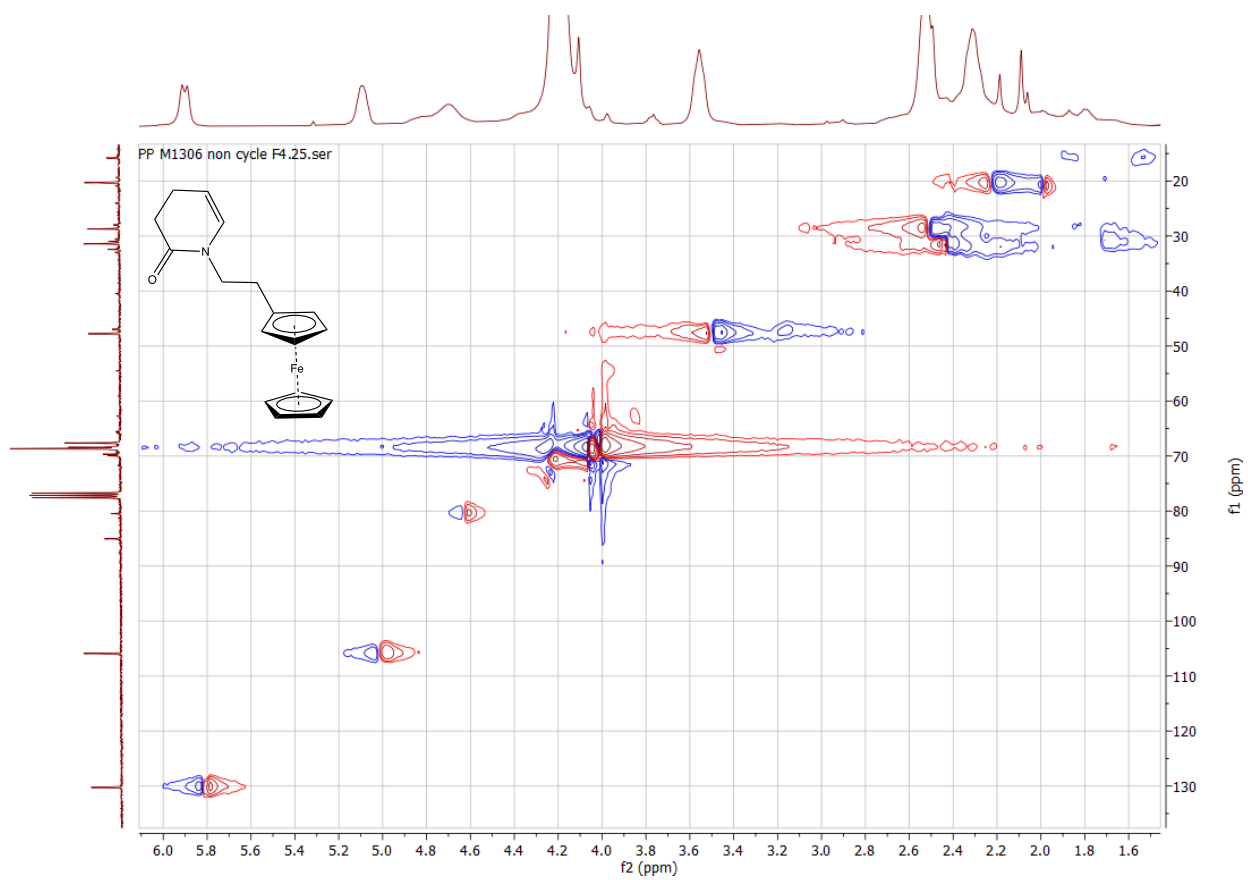

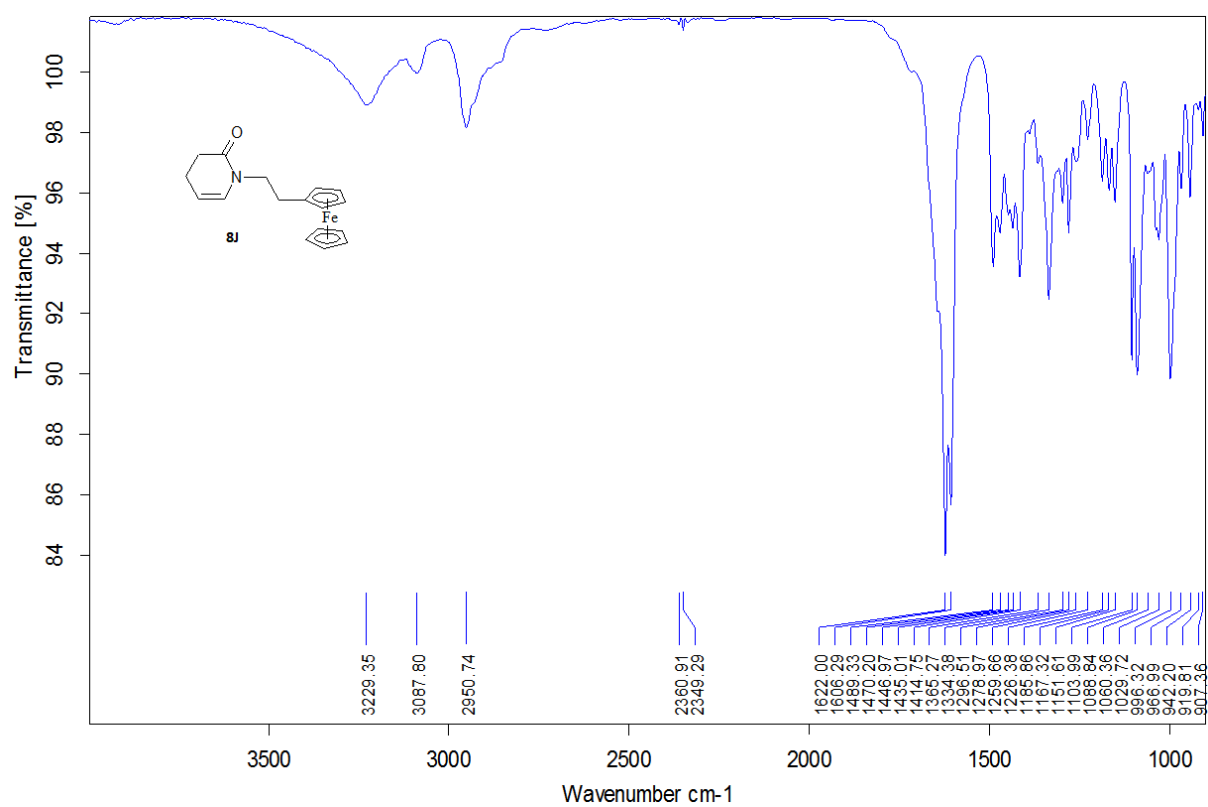

**Figure S30:**  $^1\text{H}$  (in  $\text{CDCl}_3$ ),  $^{13}\text{C}$  (in  $\text{CDCl}_3$ ) NMR and IR data for compound **9j**

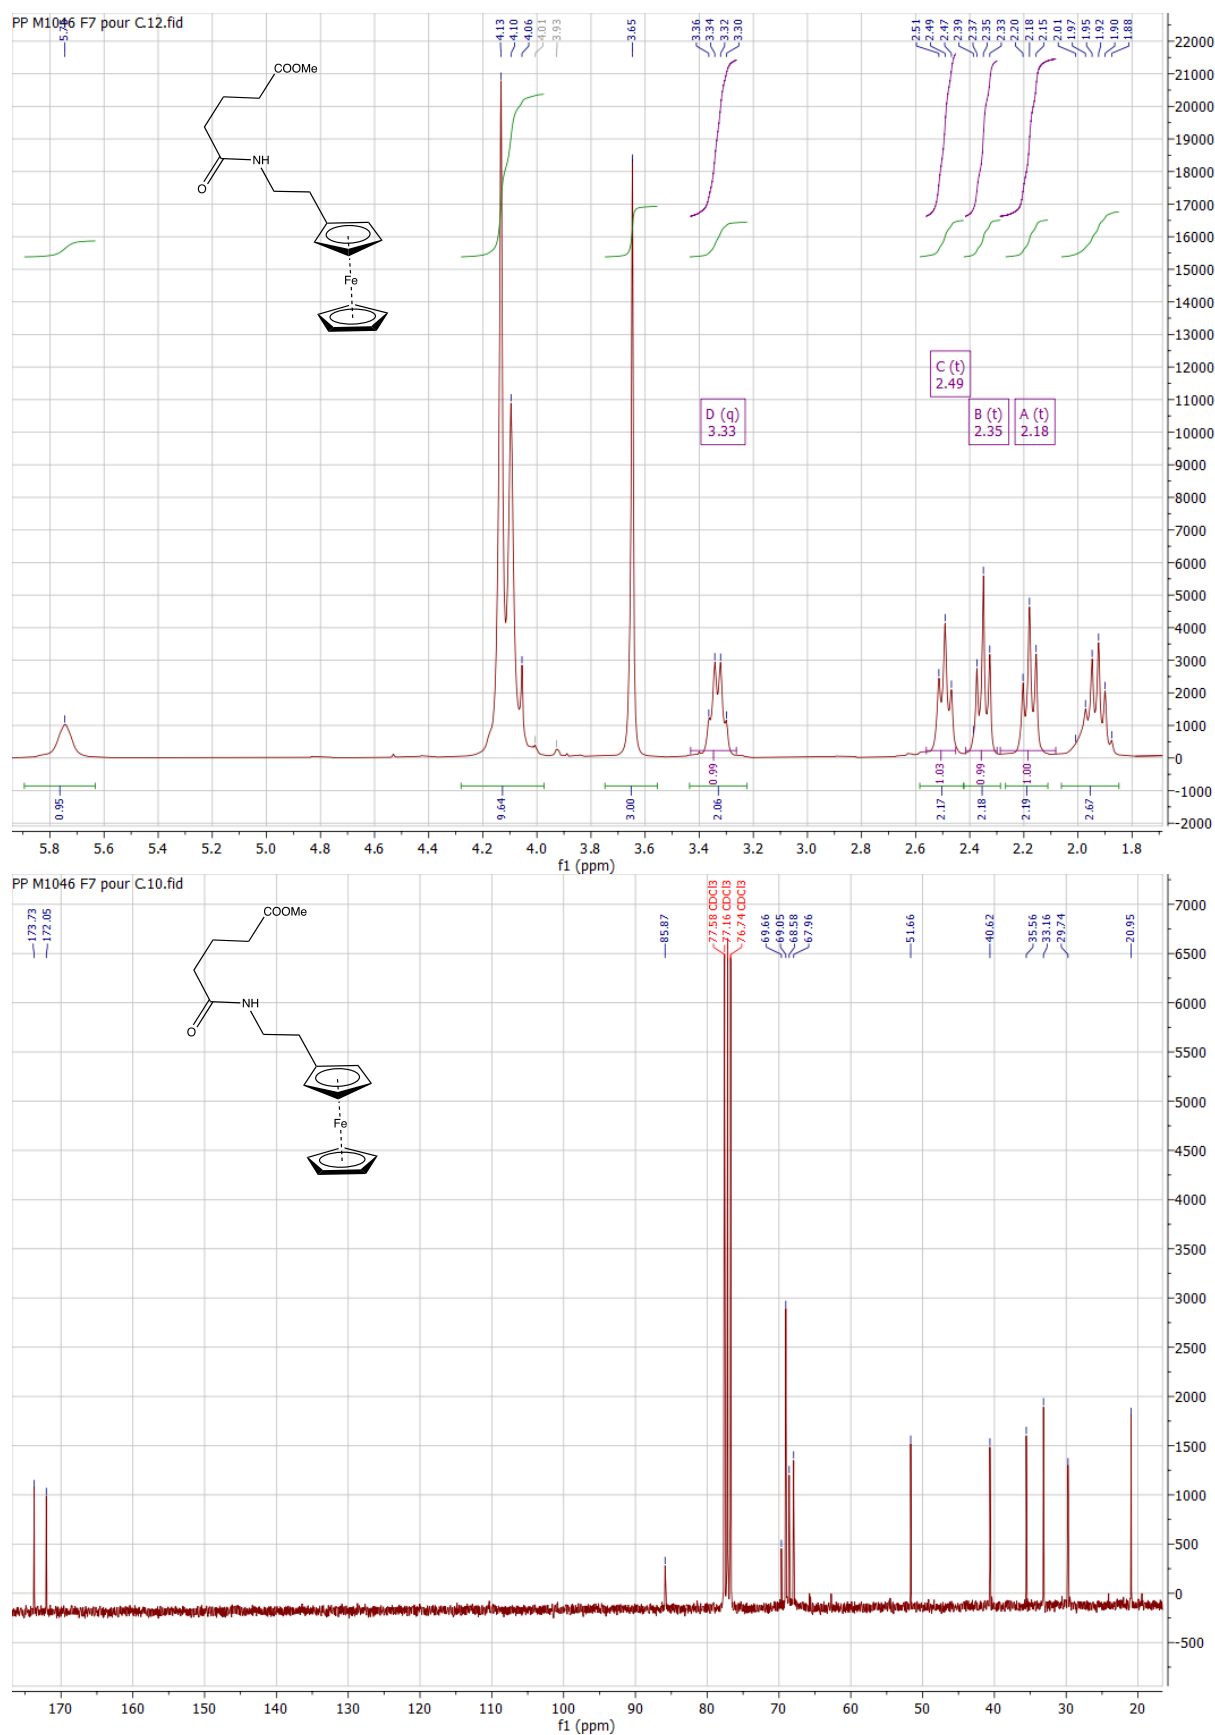

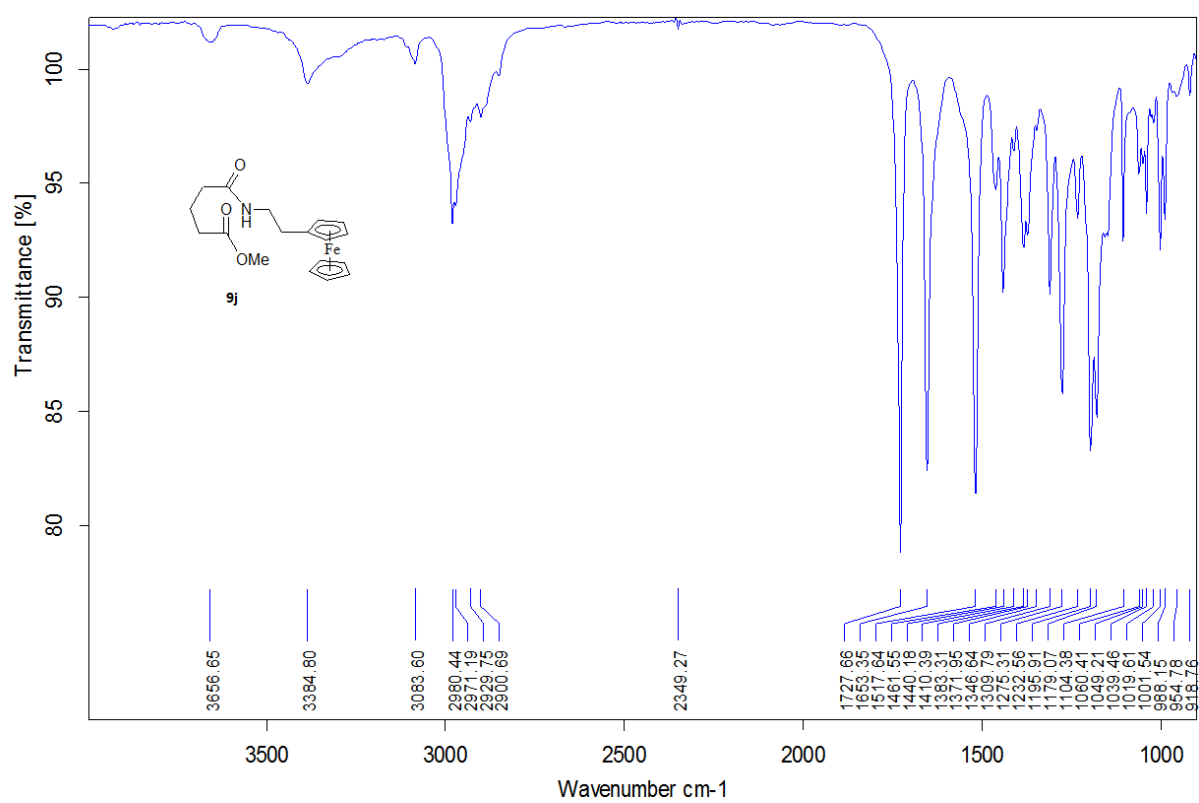

**Figure S31:**  $^1\text{H}$  (in  $\text{CDCl}_3$ ),  $^{13}\text{C}$  (in  $\text{CDCl}_3$ ), COSY (in  $\text{CDCl}_3$ ), HMQC (in  $\text{CDCl}_3$ ) NMR, HR-MS and IR data for compound **10b**

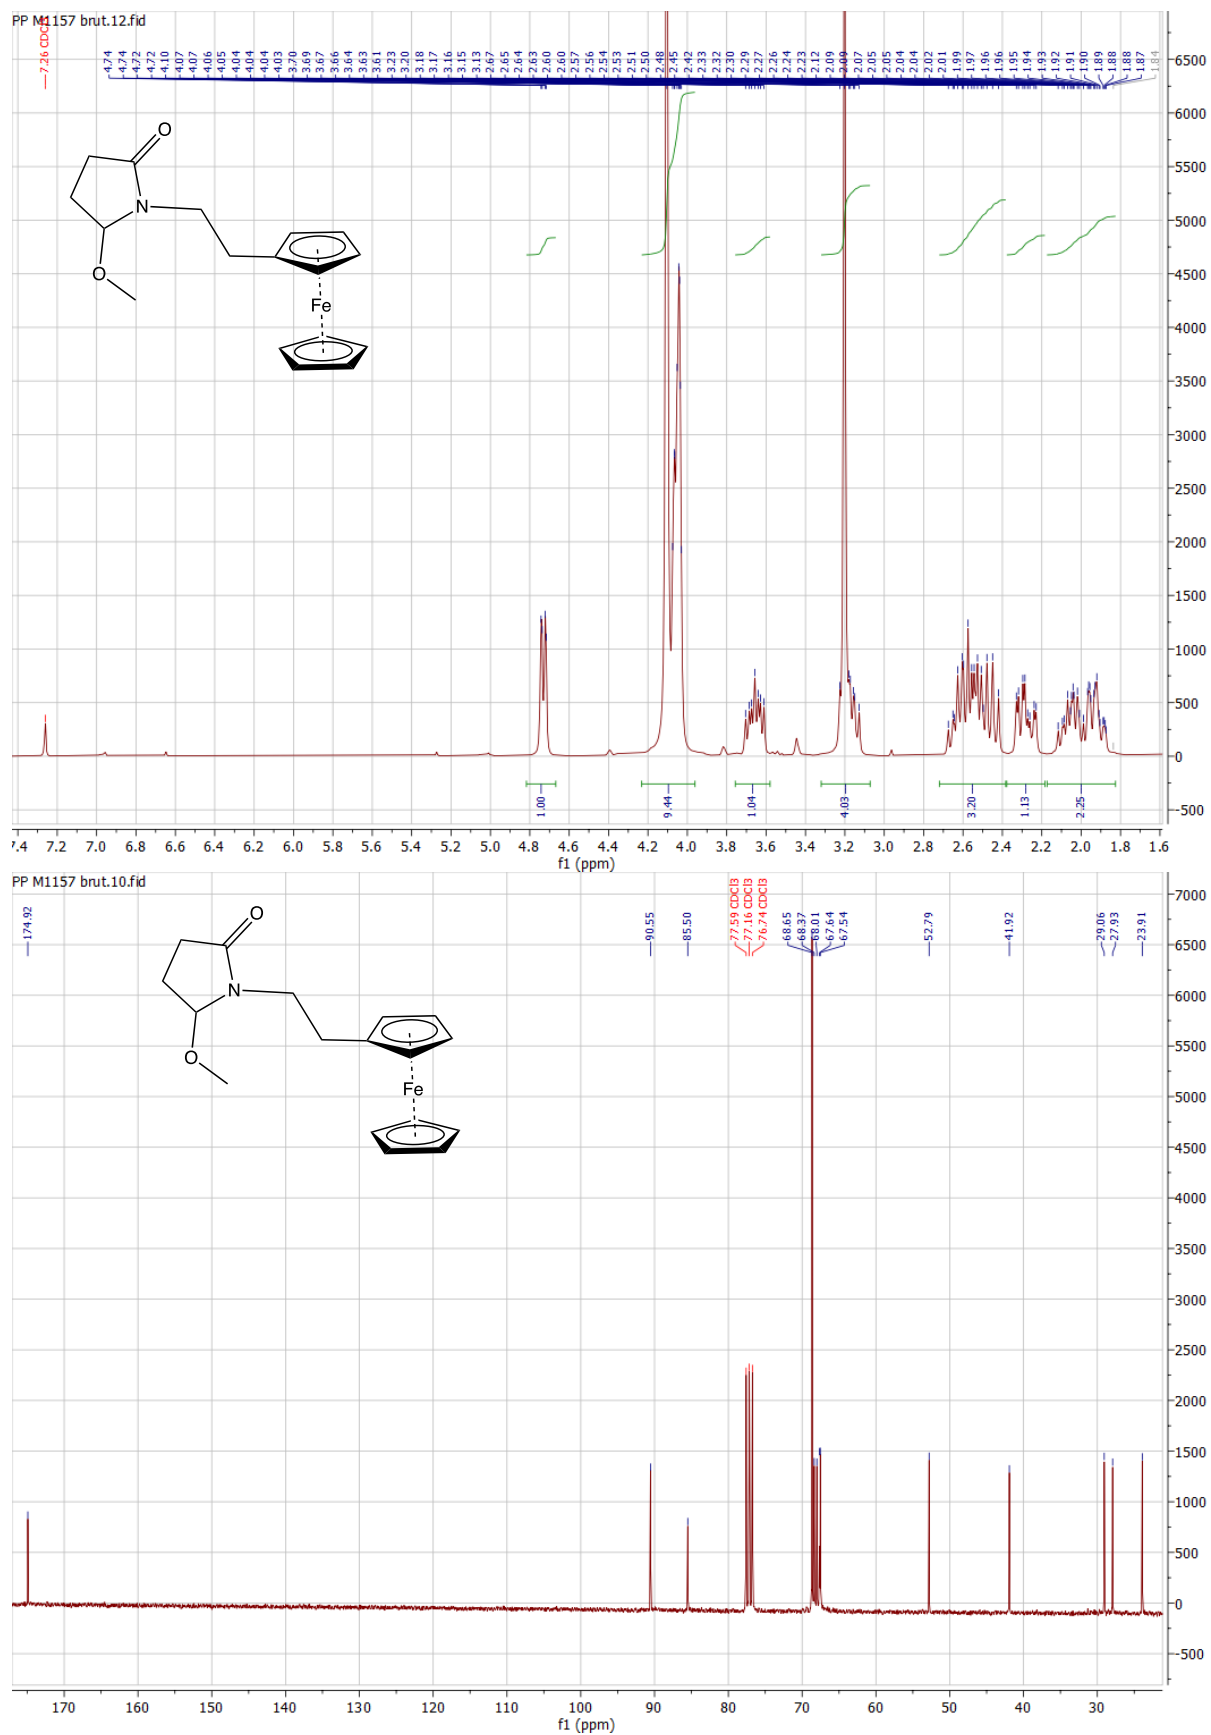

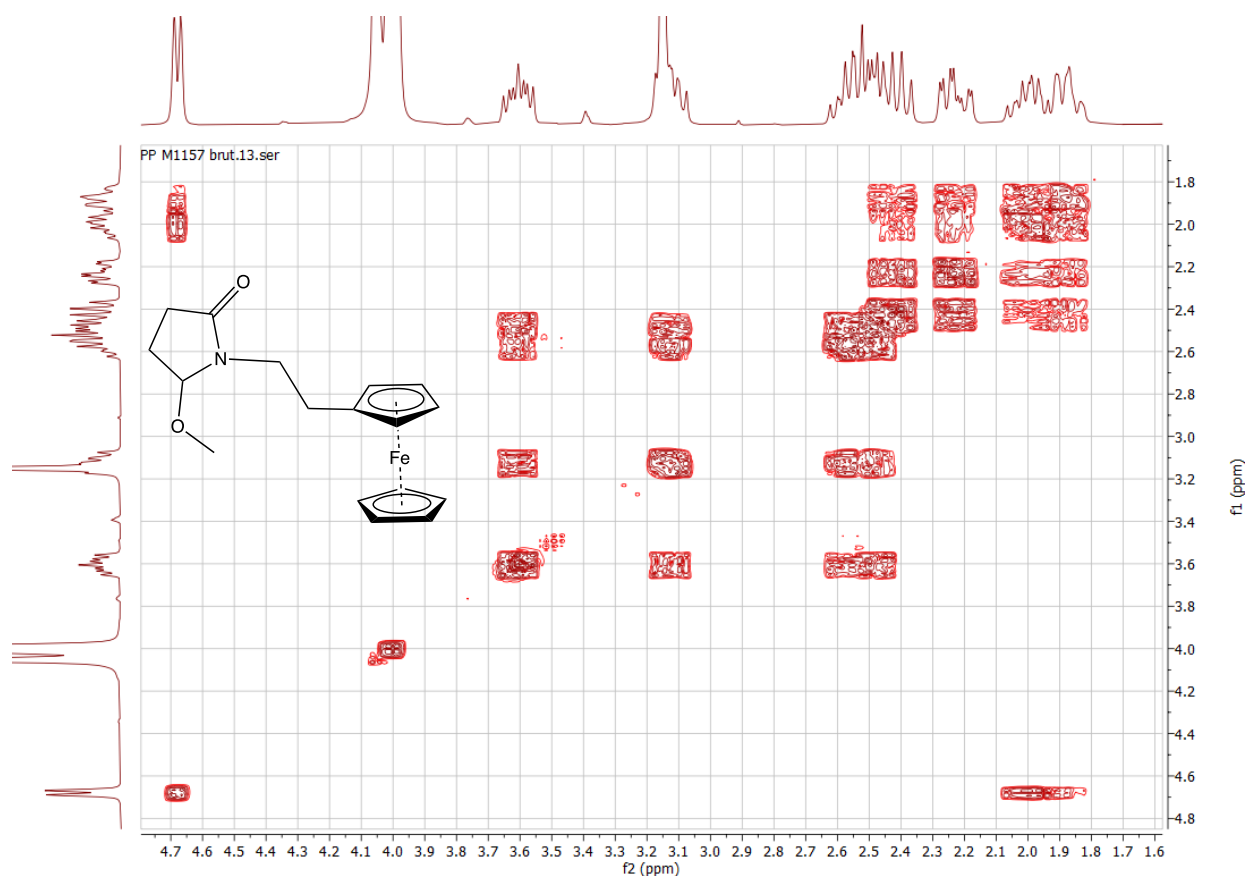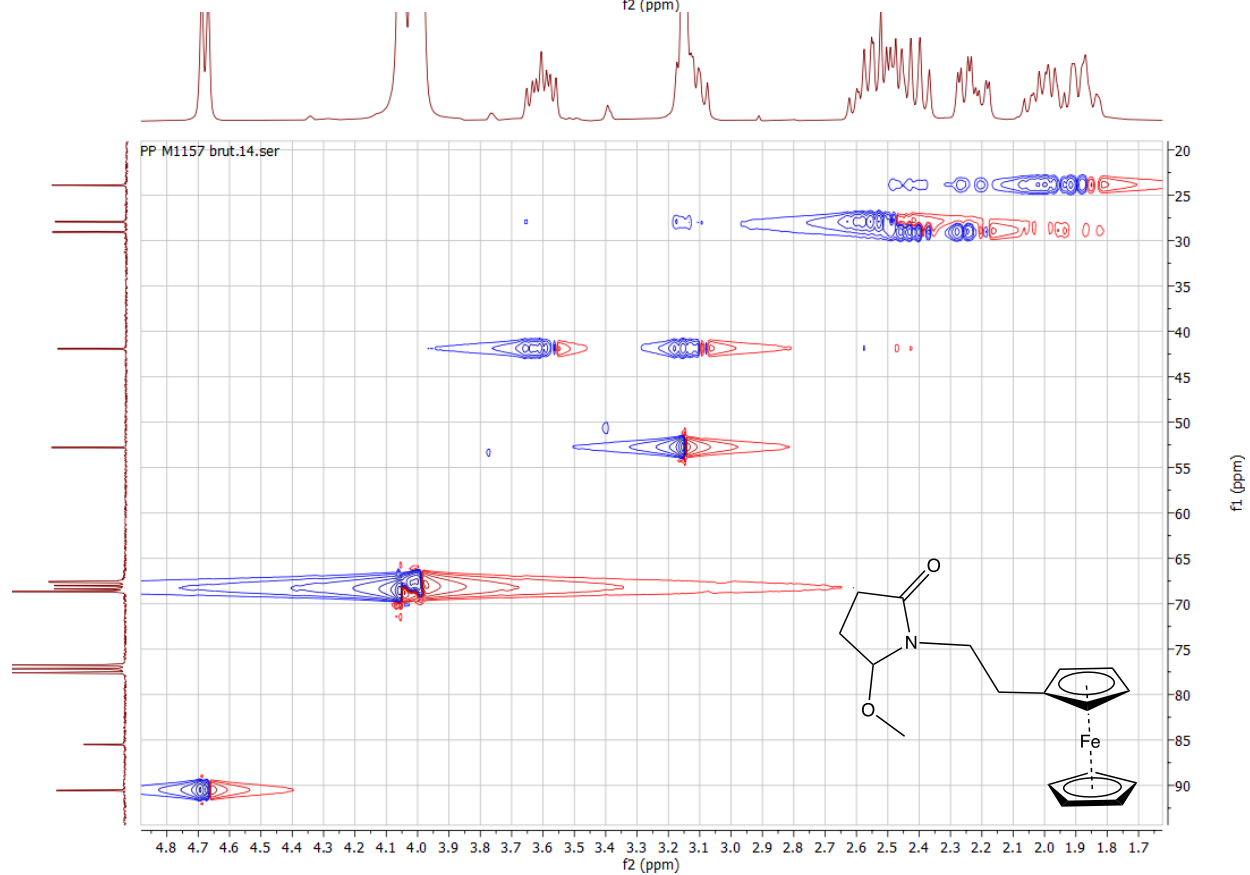

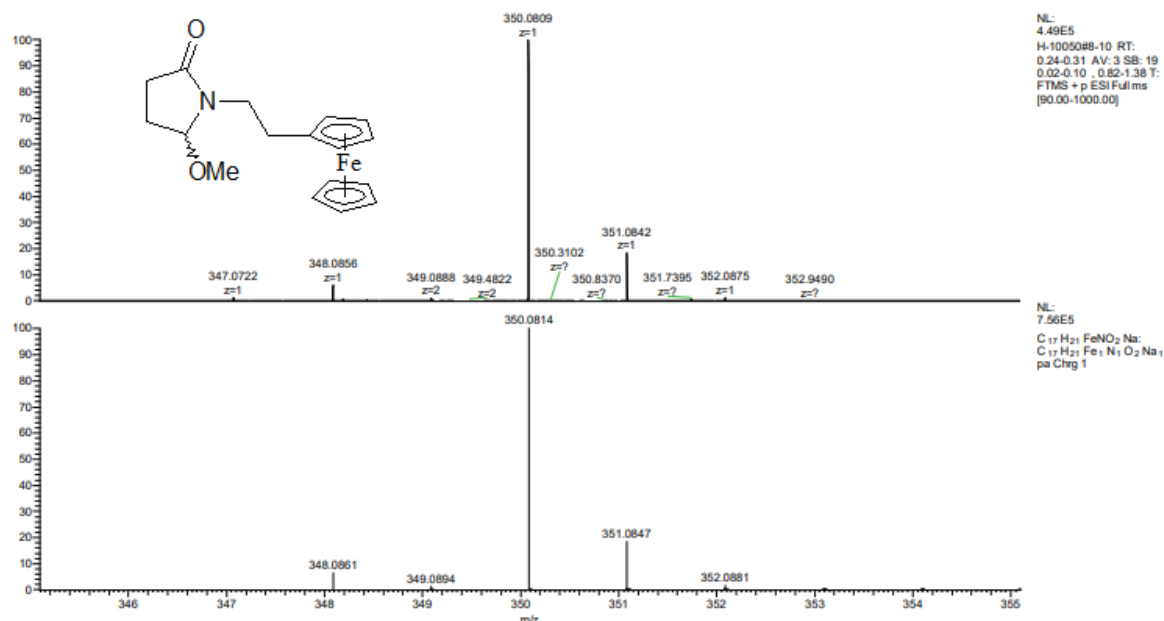

## Experimental/theoretical isotopic pattern MS spectrum

Error = -1.4 ppm; Relative Intensity (%) 100

HRMS (ESI) m/z: [M+Na]<sup>+</sup> Calcd for C<sub>17</sub>H<sub>21</sub>FeNO<sub>2</sub>Na 350.0814. Found 350.0809; (Error: -1.4 ppm).

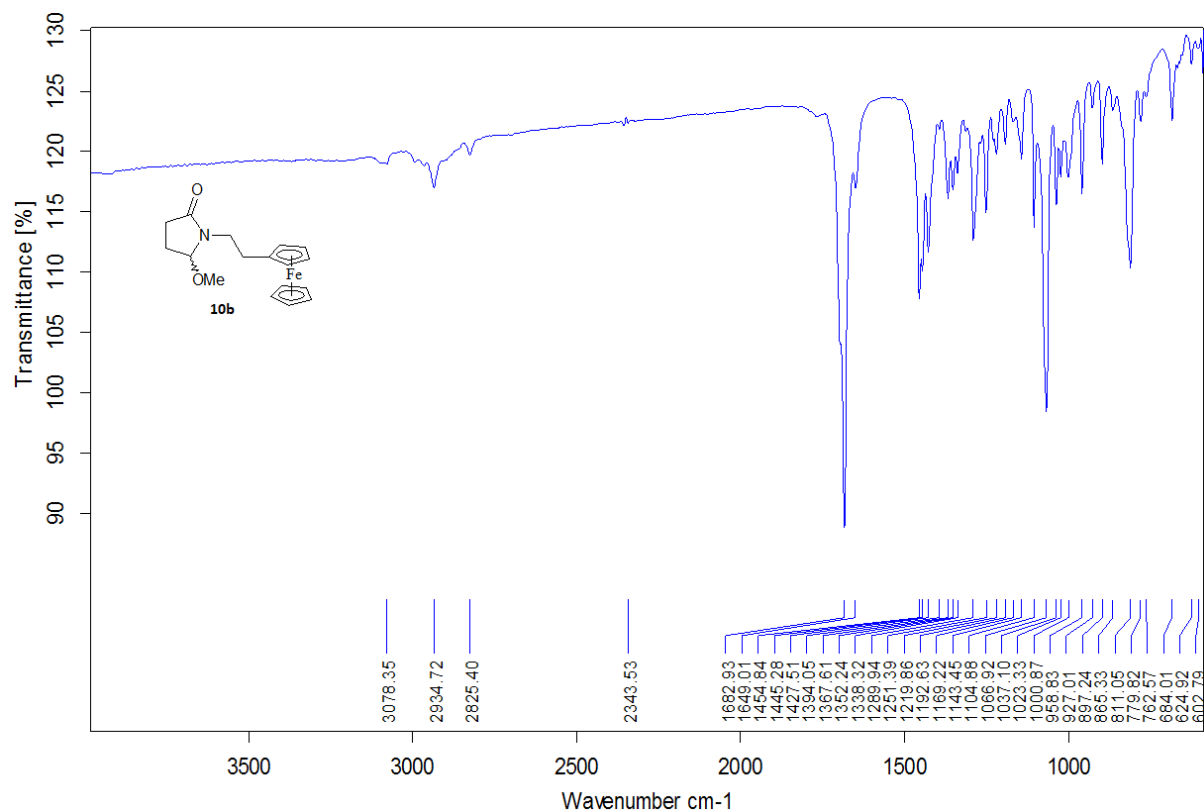

**Figure S32:**  $^1\text{H}$  (in  $\text{CDCl}_3$ ),  $^{13}\text{C}$  (in  $\text{CDCl}_3$ ) NMR, HR-MS and IR data for compound 10e

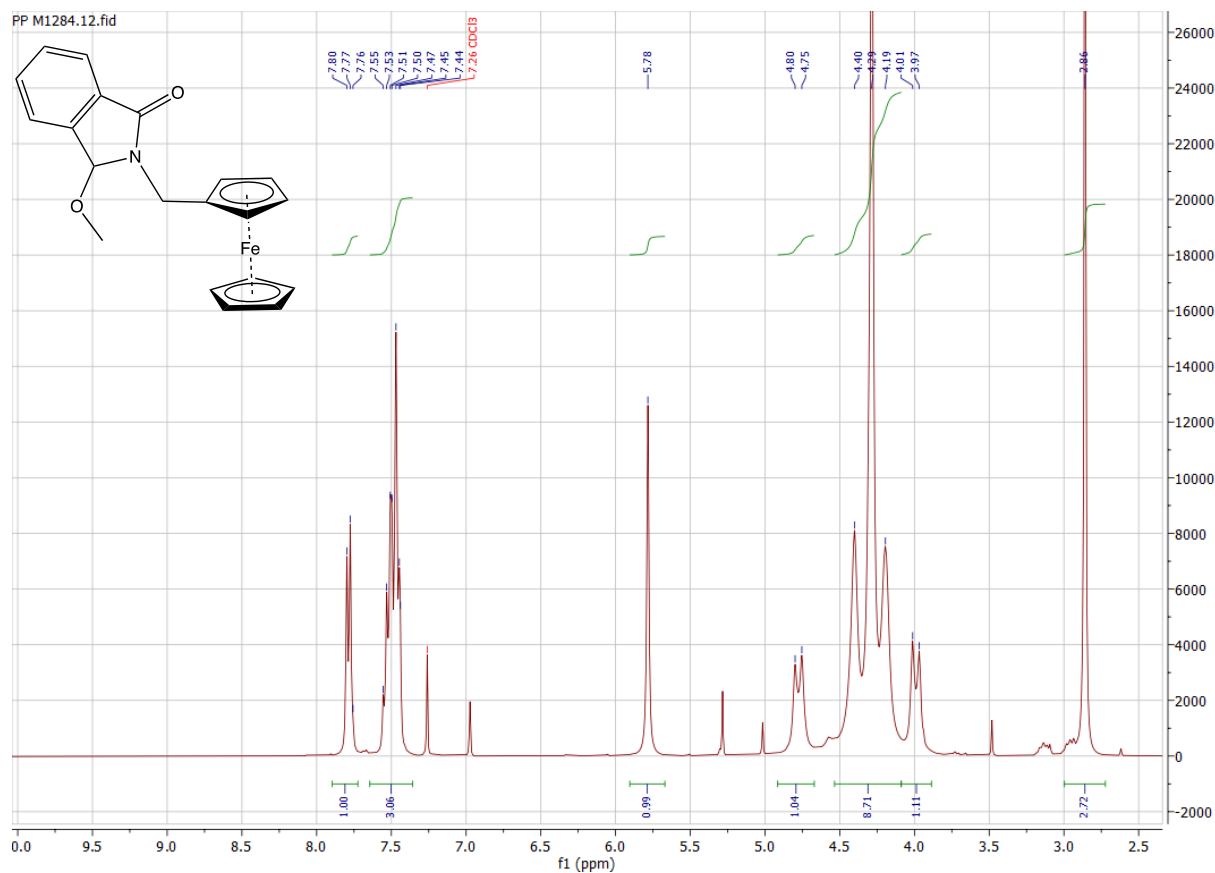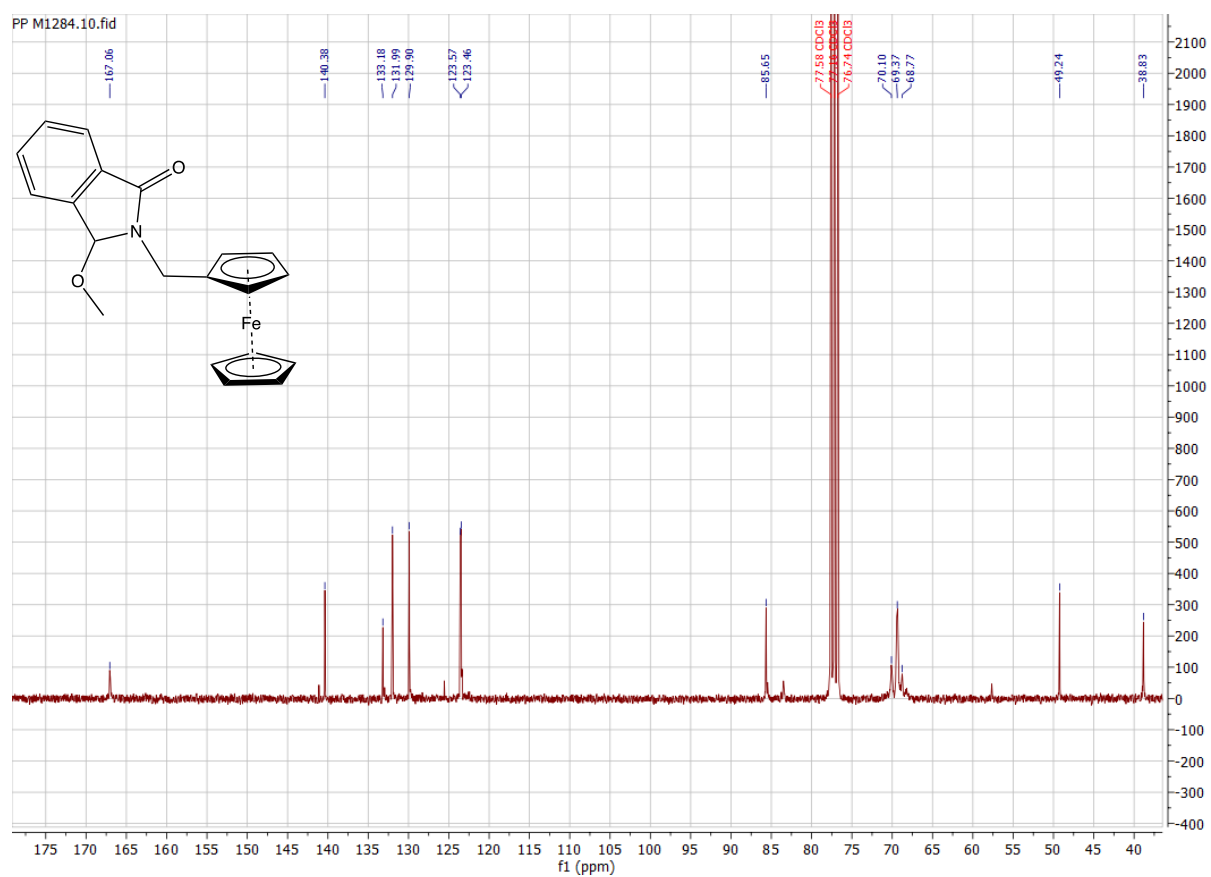



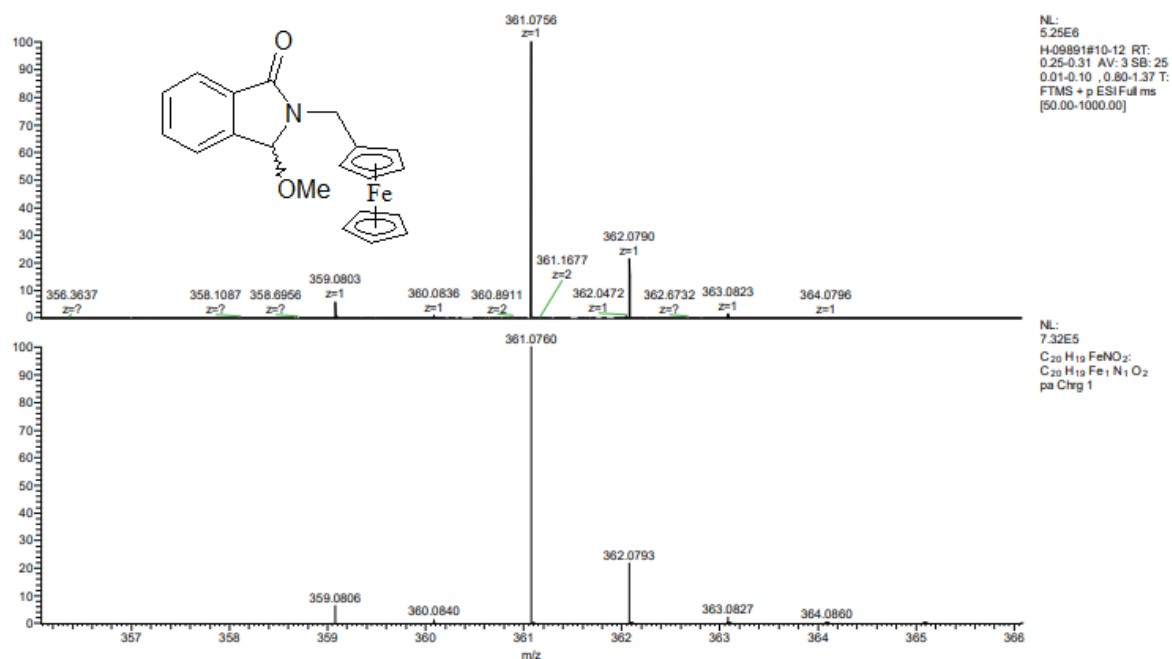

## Experimental/theoretical isotopic pattern MS spectrum

Error = -1.0 ppm; Relative Intensity (%) 100

HRMS (ESI) m/z: [M]<sup>+</sup> Calcd for C<sub>20</sub>H<sub>19</sub>FeNO<sub>2</sub> 361.0760 . Found 361.0756; (Error: -1.0 ppm).

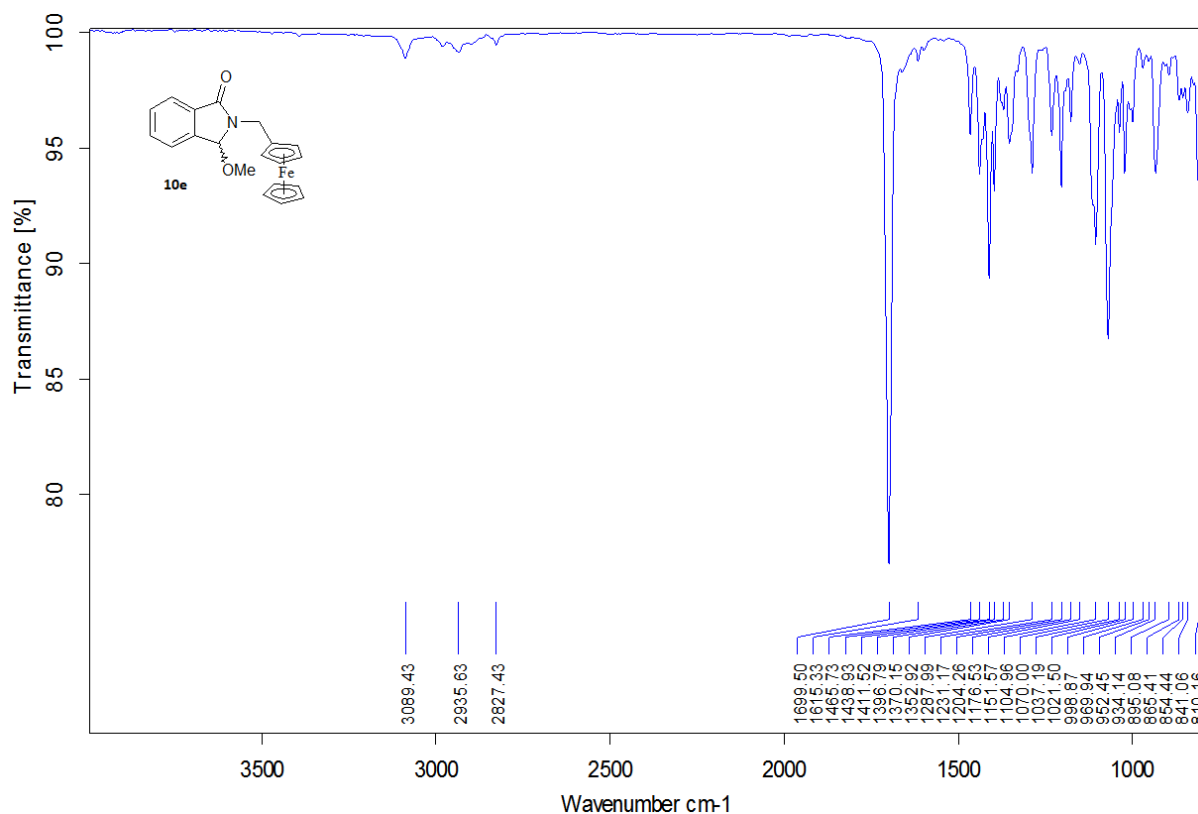

**Figure S33:**  $^1\text{H}$  (in  $\text{CDCl}_3$ ),  $^{13}\text{C}$  (in  $\text{CDCl}_3$ ) NMR, HR-MS and IR data for compound 10f

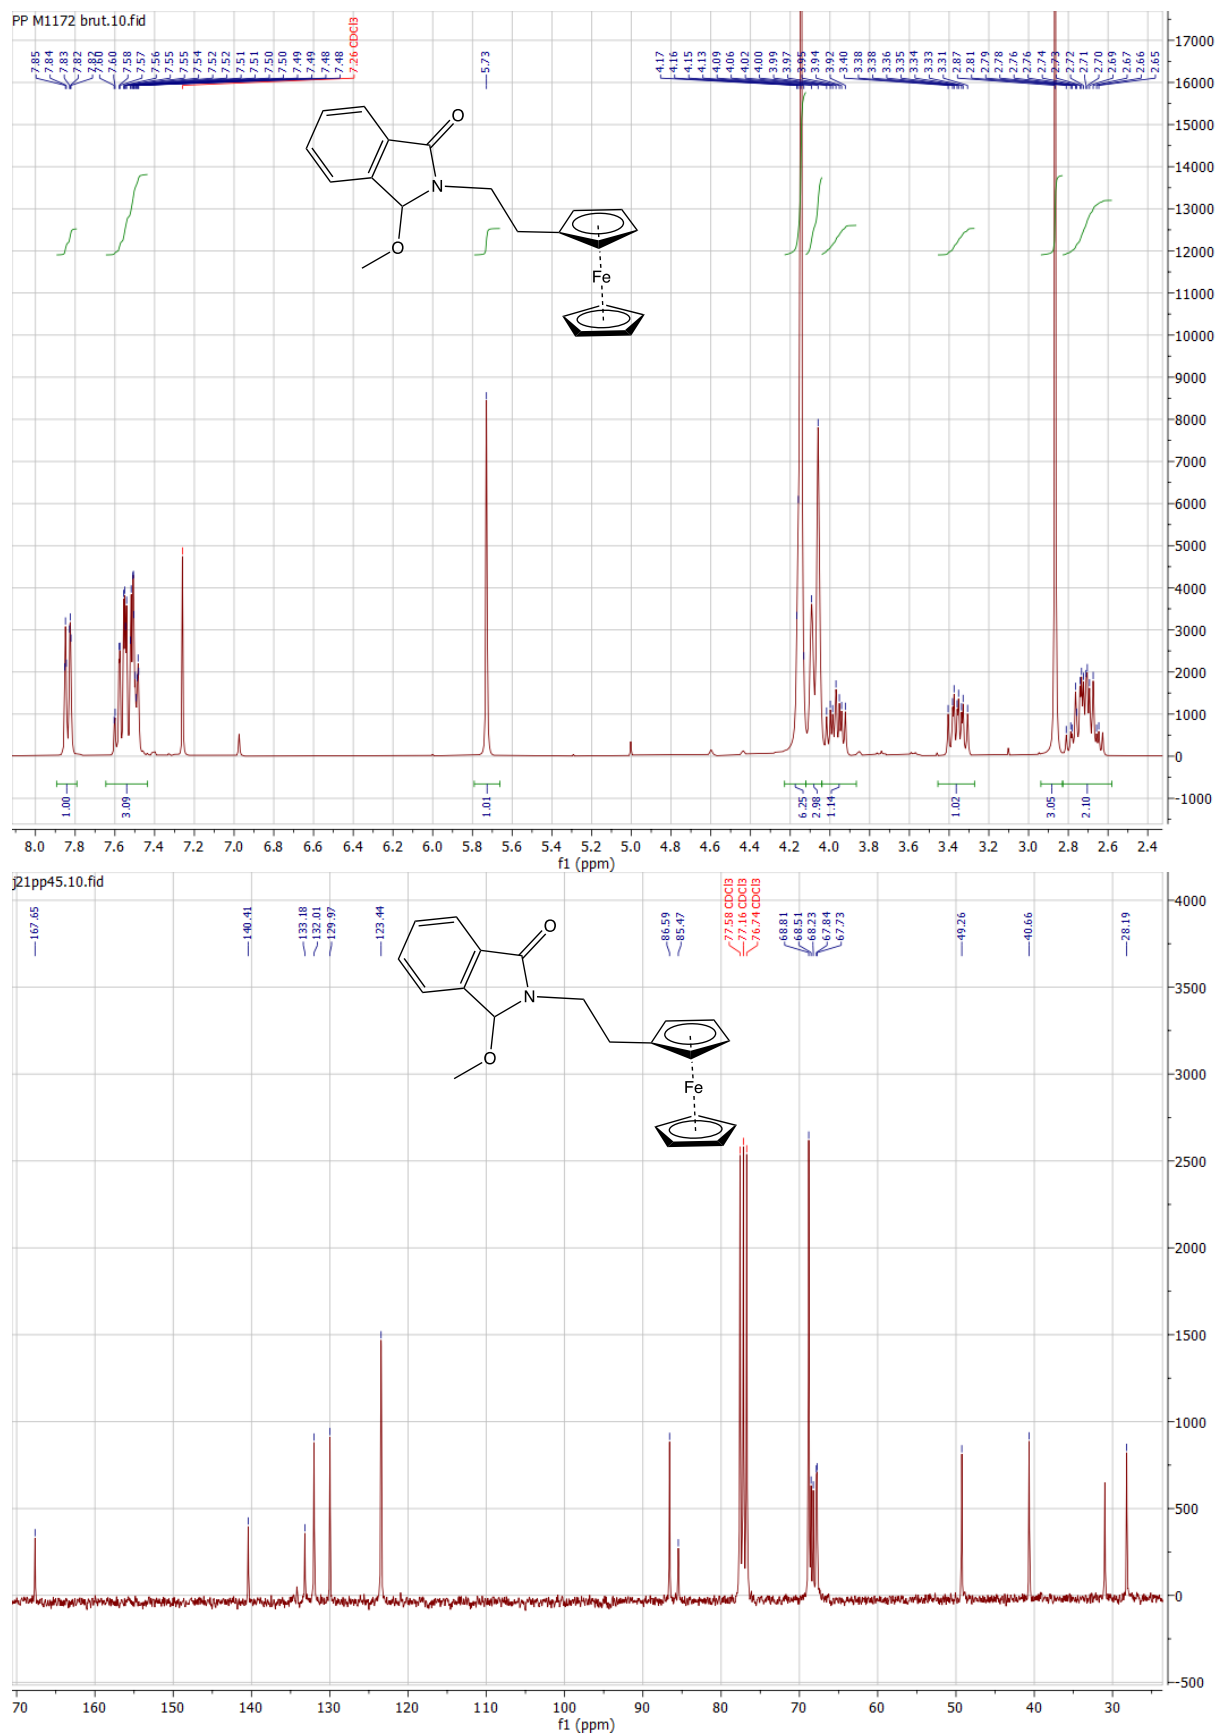

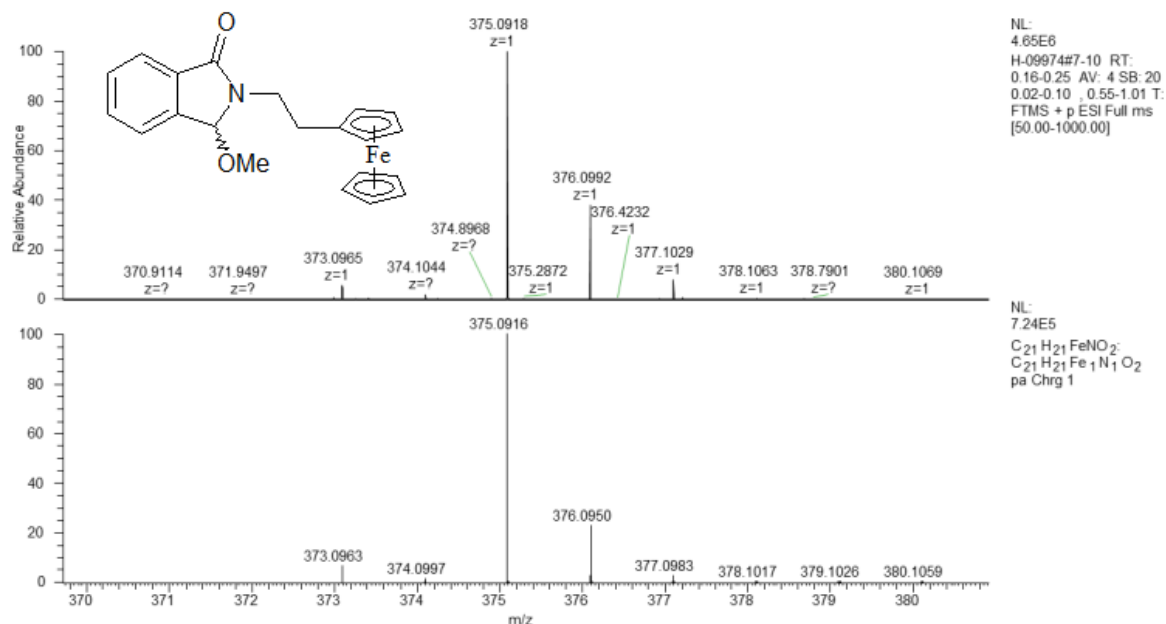

## Experimental/theoretical isotopic pattern MS spectrum

Error = 0.2 ppm; Relative Intensity (%) 100

HRMS (ESI) m/z: [M+H]<sup>+</sup> Calcd for C<sub>21</sub>H<sub>21</sub>FeNO<sub>2</sub>H 376.0994. Found 376.0995; (Error: 0.2 ppm).

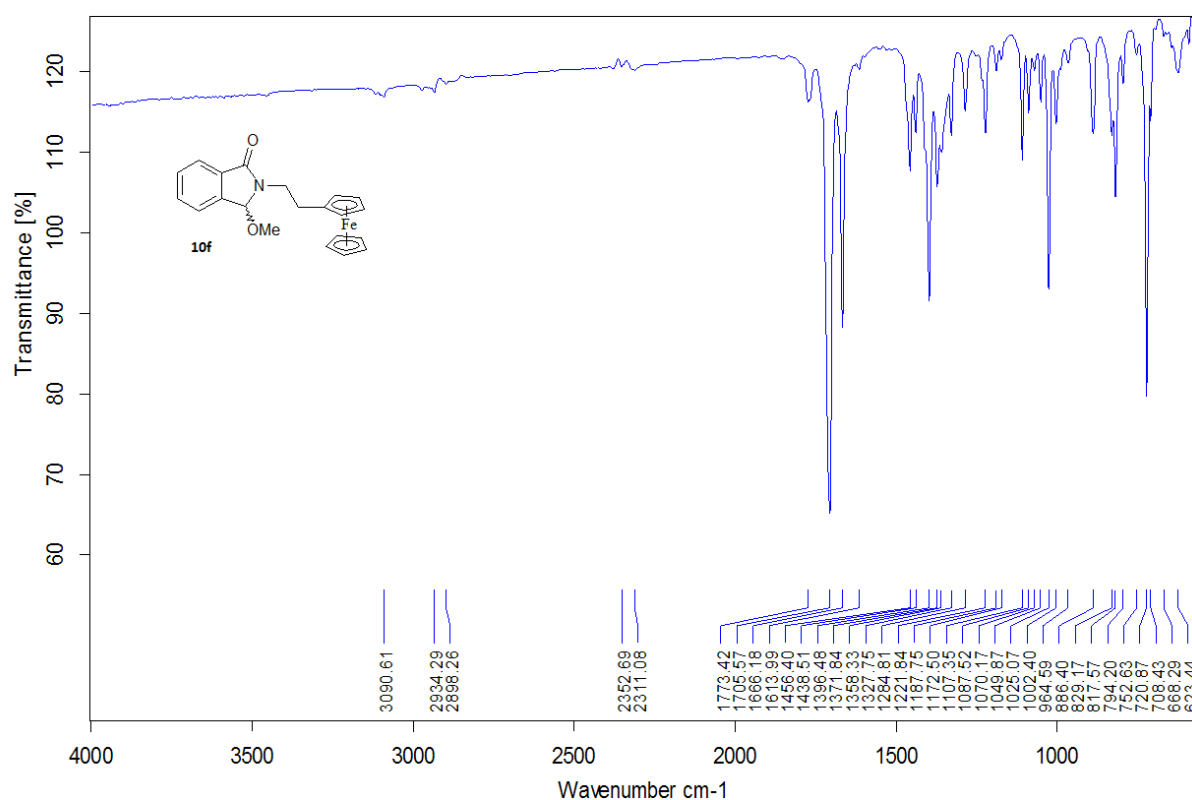

**Figure S34:**  $^1\text{H}$  (in  $\text{CDCl}_3$ ),  $^{13}\text{C}$  (in  $\text{CDCl}_3$ ) NMR, HR-MS and IR data for compound **10g**

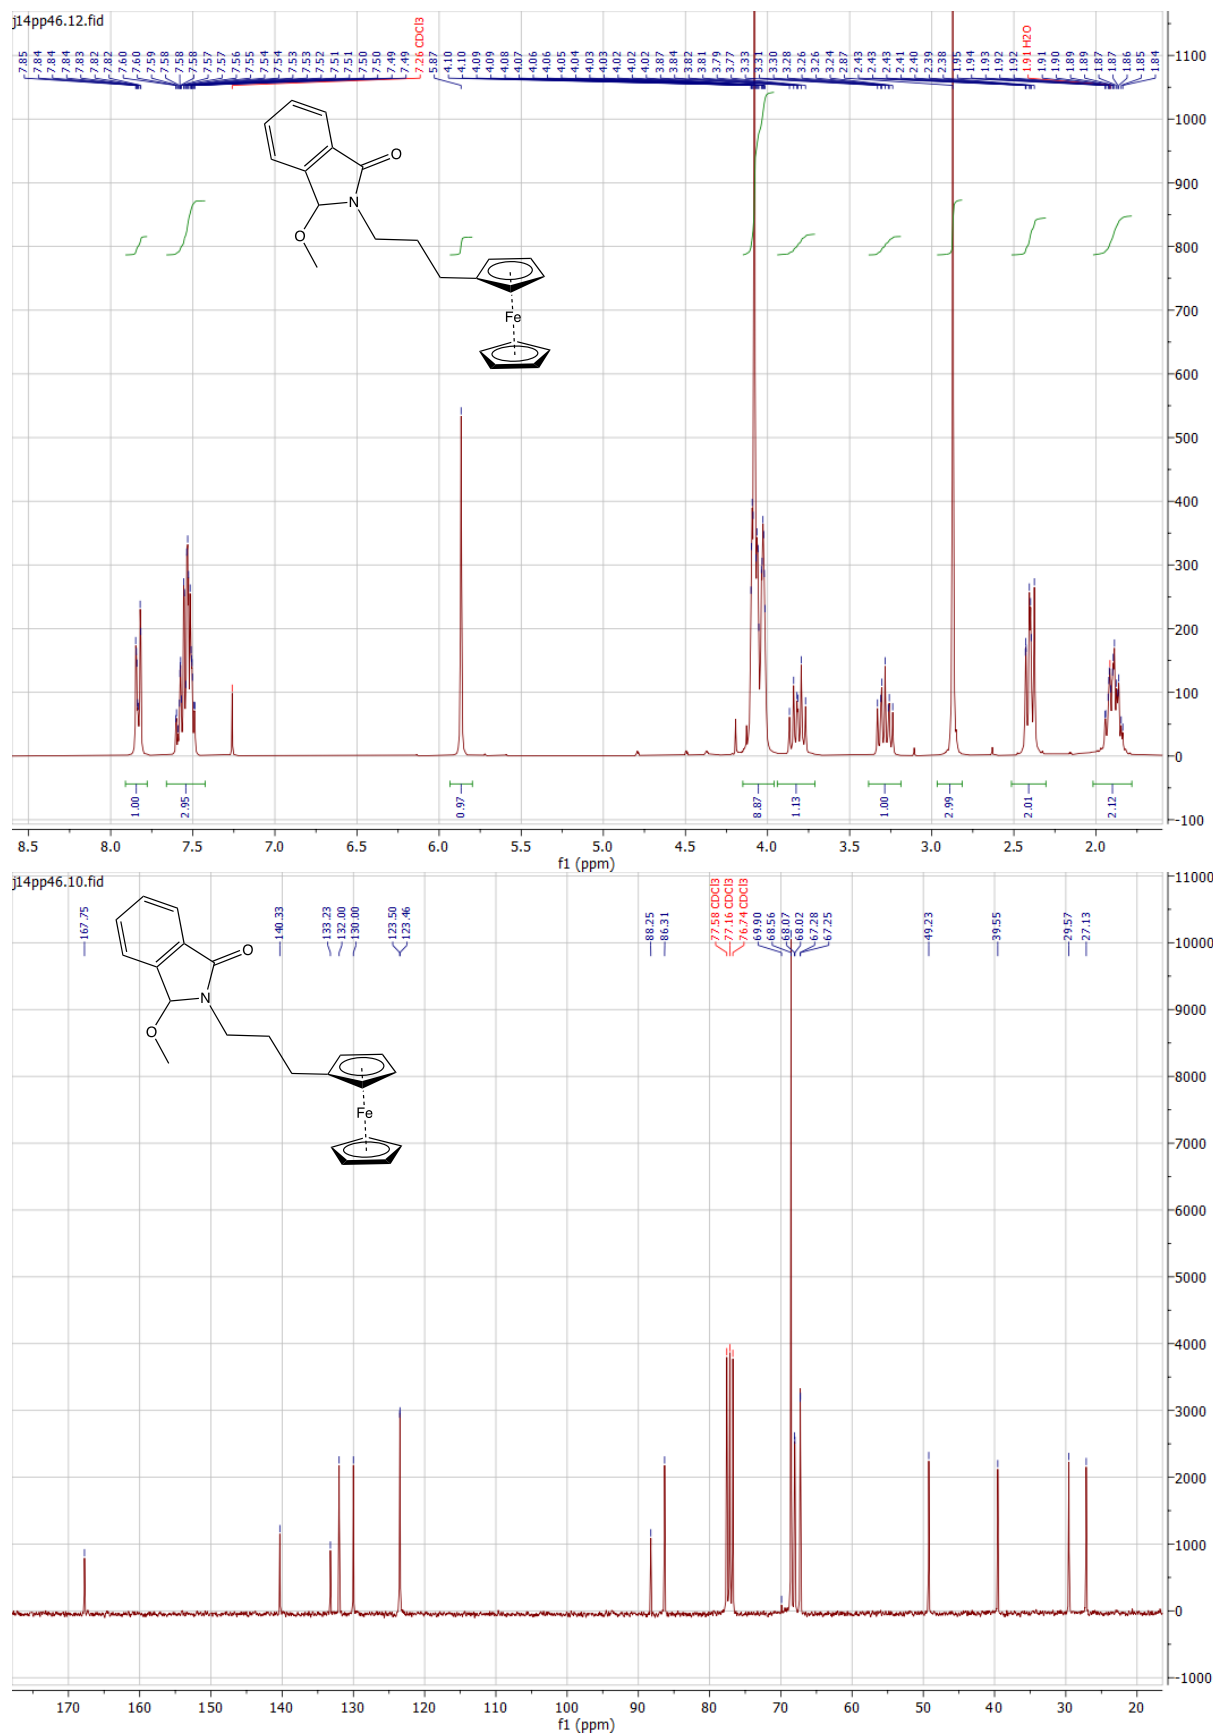

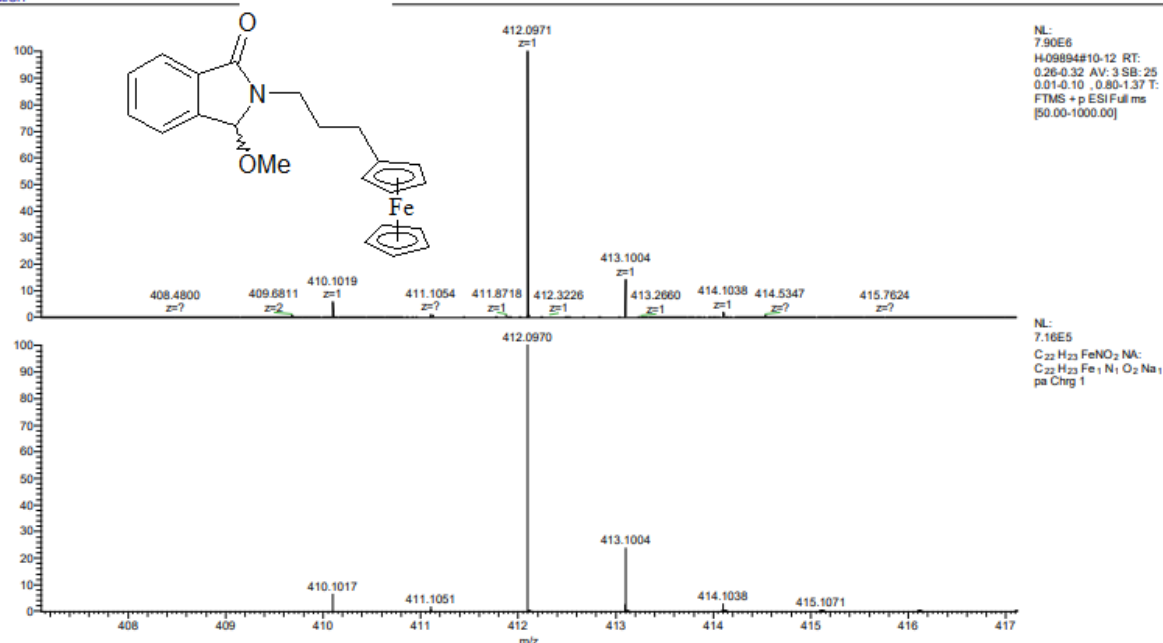

## Experimental/theoretical isotopic pattern MS spectrum

Error = 0.2 ppm; Relative Intensity (%) 100

HRMS (ESI) m/z: [M]<sup>+</sup> Calcd for C<sub>22</sub>H<sub>23</sub>FeNO<sub>2</sub>Na 412.0970 . Found 412.0971; (Error: 0.2 ppm).

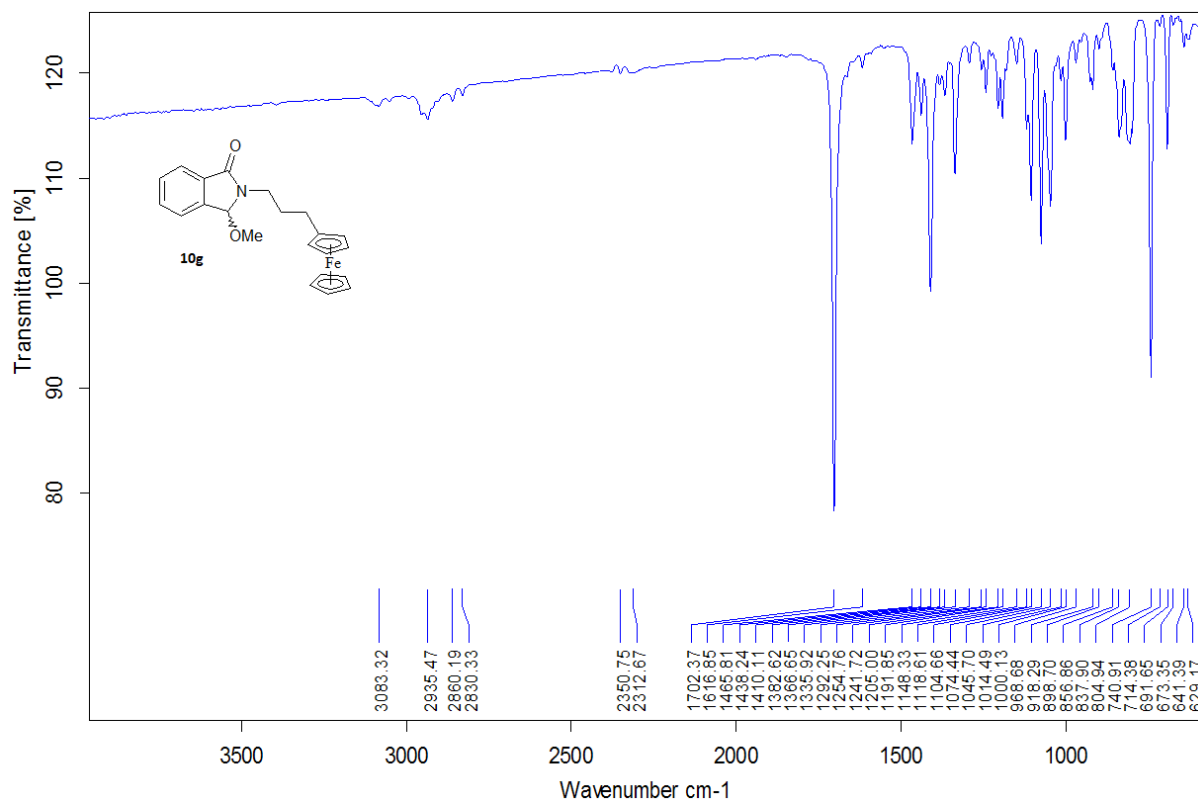

**1H NMR spectrum of compound 1 in CDCl<sub>3</sub>.**

**Chemical structure of compound 1:** COc1ccc(cc1)CCCN2C(=O)c3ccccc3N2C(=O)OCC4=CC=CC=C4[Fe]5C=CC=CC=C5

**1H NMR spectrum (CDCl<sub>3</sub>) data:**

| Chemical Shift (ppm)                                                                                                                                                                                                                                                                                                                                                                                                                                                                                                                                                                                                                                                                                                                                                                                                                                                                                                                                                                                                                                                                                                                                                                                                                                                                                                                                                                                                                                                                                                                                                                                                                                                                                                                                                                                                                                                                                                                                                                                                                                                                                                                                                                                                                                                                                                                                                                                                                                                                                                                                                                                                                                                                                                                                                                                                                                                                                                                                                                                                                                                                                                                                                                                                                                                                                                                                                                                                                                                                                                                                                                                                                                                                                                                                                                                                                                                                                                                                                                      | Integration |
|-------------------------------------------------------------------------------------------------------------------------------------------------------------------------------------------------------------------------------------------------------------------------------------------------------------------------------------------------------------------------------------------------------------------------------------------------------------------------------------------------------------------------------------------------------------------------------------------------------------------------------------------------------------------------------------------------------------------------------------------------------------------------------------------------------------------------------------------------------------------------------------------------------------------------------------------------------------------------------------------------------------------------------------------------------------------------------------------------------------------------------------------------------------------------------------------------------------------------------------------------------------------------------------------------------------------------------------------------------------------------------------------------------------------------------------------------------------------------------------------------------------------------------------------------------------------------------------------------------------------------------------------------------------------------------------------------------------------------------------------------------------------------------------------------------------------------------------------------------------------------------------------------------------------------------------------------------------------------------------------------------------------------------------------------------------------------------------------------------------------------------------------------------------------------------------------------------------------------------------------------------------------------------------------------------------------------------------------------------------------------------------------------------------------------------------------------------------------------------------------------------------------------------------------------------------------------------------------------------------------------------------------------------------------------------------------------------------------------------------------------------------------------------------------------------------------------------------------------------------------------------------------------------------------------------------------------------------------------------------------------------------------------------------------------------------------------------------------------------------------------------------------------------------------------------------------------------------------------------------------------------------------------------------------------------------------------------------------------------------------------------------------------------------------------------------------------------------------------------------------------------------------------------------------------------------------------------------------------------------------------------------------------------------------------------------------------------------------------------------------------------------------------------------------------------------------------------------------------------------------------------------------------------------------------------------------------------------------------------------------|-------------|
| 7.84, 7.83, 7.82, 7.81, 7.61, 7.60, 7.59, 7.58, 7.57, 7.56, 7.55, 7.54, 7.53, 7.52, 7.51, 7.50, 7.49, 7.48, 7.47, 7.46, 7.45, 7.44, 7.43, 7.42, 7.41, 7.40, 7.39, 7.38, 7.37, 7.36, 7.35, 7.34, 7.33, 7.32, 7.31, 7.30, 7.29, 7.28, 7.27, 7.26, 7.25, 7.24, 7.23, 7.22, 7.21, 7.20, 7.19, 7.18, 7.17, 7.16, 7.15, 7.14, 7.13, 7.12, 7.11, 7.10, 7.09, 7.08, 7.07, 7.06, 7.05, 7.04, 7.03, 7.02, 7.01, 7.00, 6.99, 6.98, 6.97, 6.96, 6.95, 6.94, 6.93, 6.92, 6.91, 6.90, 6.89, 6.88, 6.87, 6.86, 6.85, 6.84, 6.83, 6.82, 6.81, 6.80, 6.79, 6.78, 6.77, 6.76, 6.75, 6.74, 6.73, 6.72, 6.71, 6.70, 6.69, 6.68, 6.67, 6.66, 6.65, 6.64, 6.63, 6.62, 6.61, 6.60, 6.59, 6.58, 6.57, 6.56, 6.55, 6.54, 6.53, 6.52, 6.51, 6.50, 6.49, 6.48, 6.47, 6.46, 6.45, 6.44, 6.43, 6.42, 6.41, 6.40, 6.39, 6.38, 6.37, 6.36, 6.35, 6.34, 6.33, 6.32, 6.31, 6.30, 6.29, 6.28, 6.27, 6.26, 6.25, 6.24, 6.23, 6.22, 6.21, 6.20, 6.19, 6.18, 6.17, 6.16, 6.15, 6.14, 6.13, 6.12, 6.11, 6.10, 6.09, 6.08, 6.07, 6.06, 6.05, 6.04, 6.03, 6.02, 6.01, 6.00, 5.99, 5.98, 5.97, 5.96, 5.95, 5.94, 5.93, 5.92, 5.91, 5.90, 5.89, 5.88, 5.87, 5.86, 5.85, 5.84, 5.83, 5.82, 5.81, 5.80, 5.79, 5.78, 5.77, 5.76, 5.75, 5.74, 5.73, 5.72, 5.71, 5.70, 5.69, 5.68, 5.67, 5.66, 5.65, 5.64, 5.63, 5.62, 5.61, 5.60, 5.59, 5.58, 5.57, 5.56, 5.55, 5.54, 5.53, 5.52, 5.51, 5.50, 5.49, 5.48, 5.47, 5.46, 5.45, 5.44, 5.43, 5.42, 5.41, 5.40, 5.39, 5.38, 5.37, 5.36, 5.35, 5.34, 5.33, 5.32, 5.31, 5.30, 5.29, 5.28, 5.27, 5.26, 5.25, 5.24, 5.23, 5.22, 5.21, 5.20, 5.19, 5.18, 5.17, 5.16, 5.15, 5.14, 5.13, 5.12, 5.11, 5.10, 5.09, 5.08, 5.07, 5.06, 5.05, 5.04, 5.03, 5.02, 5.01, 5.00, 4.99, 4.98, 4.97, 4.96, 4.95, 4.94, 4.93, 4.92, 4.91, 4.90, 4.89, 4.88, 4.87, 4.86, 4.85, 4.84, 4.83, 4.82, 4.81, 4.80, 4.79, 4.78, 4.77, 4.76, 4.75, 4.74, 4.73, 4.72, 4.71, 4.70, 4.69, 4.68, 4.67, 4.66, 4.65, 4.64, 4.63, 4.62, 4.61, 4.60, 4.59, 4.58, 4.57, 4.56, 4.55, 4.54, 4.53, 4.52, 4.51, 4.50, 4.49, 4.48, 4.47, 4.46, 4.45, 4.44, 4.43, 4.42, 4.41, 4.40, 4.39, 4.38, 4.37, 4.36, 4.35, 4.34, 4.33, 4.32, 4.31, 4.30, 4.29, 4.28, 4.27, 4.26, 4.25, 4.24, 4.23, 4.22, 4.21, 4.20, 4.19, 4.18, 4.17, 4.16, 4.15, 4.14, 4.13, 4.12, 4.11, 4.10, 4.09, 4.08, 4.07, 4.06, 4.05, 4.04, 4.03, 4.02, 4.01, 4.00, 3.99, 3.98, 3.97, 3.96, 3.95, 3.94, 3.93, 3.92, 3.91, 3.90, 3.89, 3.88, 3.87, 3.86, 3.85, 3.84, 3.83, 3.82, 3.81, 3.80, 3.79, 3.78, 3.77, 3.76, 3.75, 3.74, 3.73, 3.72, 3.71, 3.70, 3.69, 3.68, 3.67, 3.66, 3.65, 3.64, 3.63, 3.62, 3.61, 3.60, 3.59, 3.58, 3.57, 3.56, 3.55, 3.54, 3.53, 3.52, 3.51, 3.50, 3.49, 3.48, 3.47, 3.46, 3.45, 3.44, 3.43, 3.42, 3.41, 3.40, 3.39, 3.38, 3.37, 3.36, 3.35, 3.34, 3.33, 3.32, 3.31, 3.30, 3.29, 3.28, 3.27, 3.26, 3.25, 3.24, 3.23, 3.22, 3.21, 3.20, 3.19, 3.18, 3.17, 3.16, 3.15, 3.14, 3.13, 3.12, 3.11, 3.10, 3.09, 3.08, 3.07, 3.06, 3.05, 3.04, 3.03, 3.02, 3.01, 3.00, 2.99, 2.98, 2.97, 2.96, 2.95, 2.94, 2.93, 2.92, 2.91, 2.90, 2.89, 2.88, 2.87, 2.86, 2.85, 2.84, 2.83, 2.82, 2.81, 2.80, 2.79, 2.78, 2.77, 2.76, 2.75, 2.74, 2.73, 2.72, 2.71, 2.70, 2.69, 2.68, 2.67, 2.66, 2.65, 2.64, 2.63, 2.62, 2.61, 2.60, 2.59, 2.58, 2.57, 2.56, 2.55, 2.54, 2.53, 2.52, 2.51, 2.50, 2.49, 2.48, 2.47, 2.46, 2.45, 2.44, 2.43, 2.42, 2.41, 2.40, 2.39, 2.38, 2.37, 2.36, 2.35, 2.34, 2.33, 2.32, 2.31, 2.30, 2.29, 2.28, 2.27, 2.26, 2.25, 2.24, 2.23, 2.22, 2.21, 2.20, 2.19, 2.18, 2.17, 2.16, 2.15, 2.14, 2.13, 2.12, 2.11, 2.10, 2.09, 2.08, 2.07, 2.06, 2.05, 2.04, 2.03, 2.02, 2.01, 2.00, 1.99, 1.98, 1.97, 1.96, 1.95, 1.94, 1.93, 1.92, 1.91, 1.90, 1.89, 1.88, 1.87, 1.86, 1.85, 1.84, 1.83, 1.82, 1.81, 1.80, 1.79, 1.78, 1.77, 1.76, 1.75, 1.74, 1.73, 1.72, 1.71, 1.70, 1.69, 1.68, 1.67, 1.66, 1.65, 1.64, 1.63, 1.62, 1.61, 1.60, 1.59, 1.58, 1.57, 1.56, 1.55, 1.54, 1.53, 1.52, 1.51, 1.50, 1.49, 1.48, 1.47, 1.46, 1.45, 1.44, 1.43, 1.42, 1.41, 1.40, 1.39, 1.38, 1.37, 1.36, 1.35, 1.34, 1.33, 1.32, 1.31, 1.30, 1.29, 1.28, 1.27, |             |

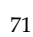

# Single Mass Analysis

Tolerance = 5.0 PPM / DBE: min = -1.5, max = 100.0

Element prediction: Off

Number of isotope peaks used for i-FIT = 9

Monoisotopic Mass, Odd Electron Ions

174 formula(e) evaluated with 1 results within limits (all results (up to 1000) for each mass)

Elements Used:

C: 1-150 H: 1-150 N: 0-3 O: 0-10 Fe: 1-1

19-Jun-2013 2:11:06

ENSCP\_P715 37 (0.932) Cm (32.47)

ACN

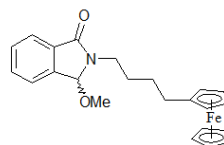

LCT Premier XE KE483  
1: TOF MS ES+  
1.12e+005

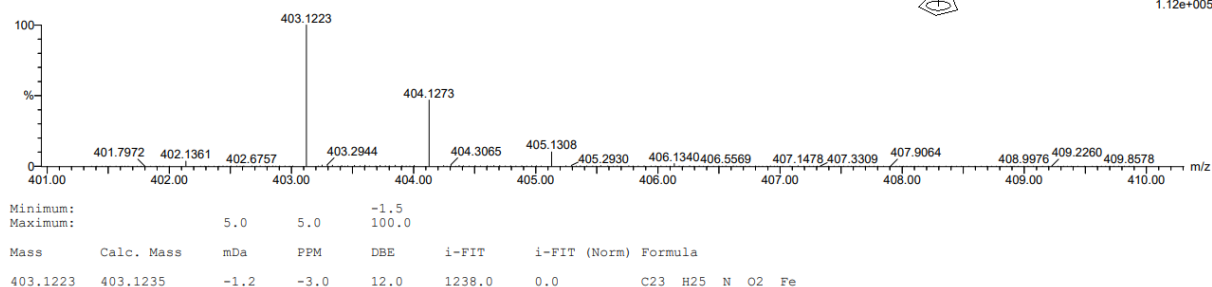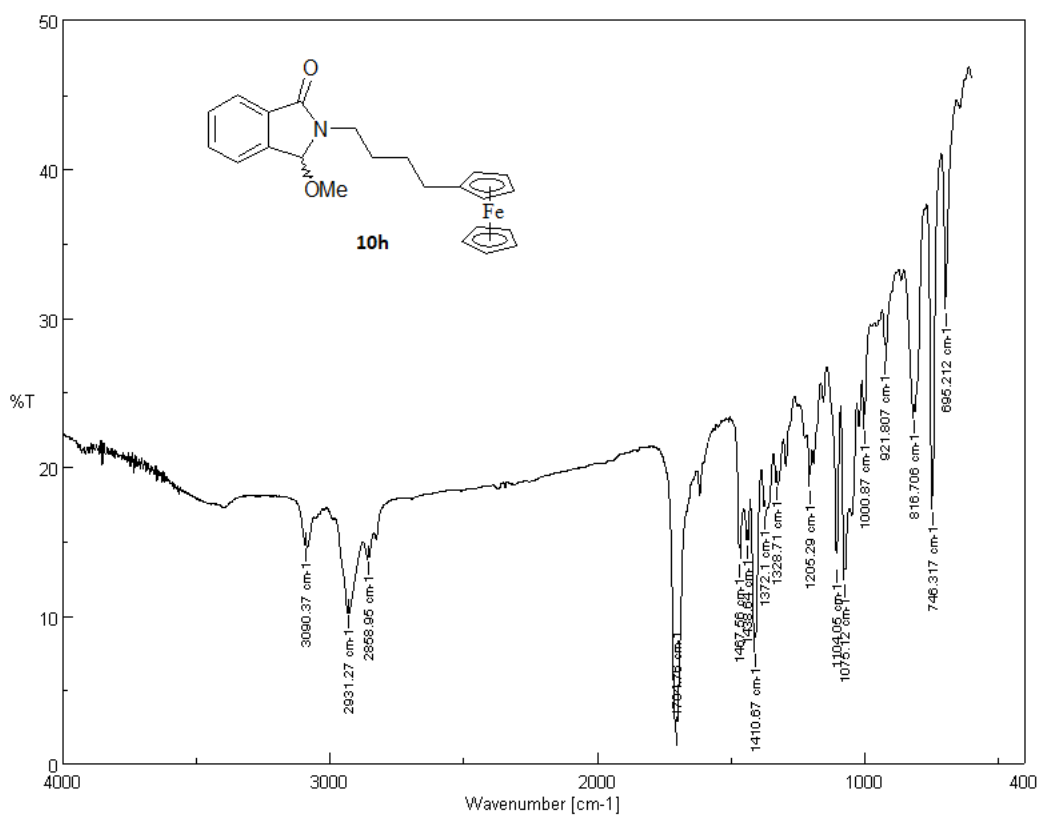

**Figure S36:**  $^1\text{H}$  (in  $\text{DMSO-d}_6$ ),  $^{13}\text{C}$  (in  $\text{CDCl}_3$ ), COSY (in  $\text{DMSO-d}_6$ ) NMR, HR-MS and IR data for compound **11**

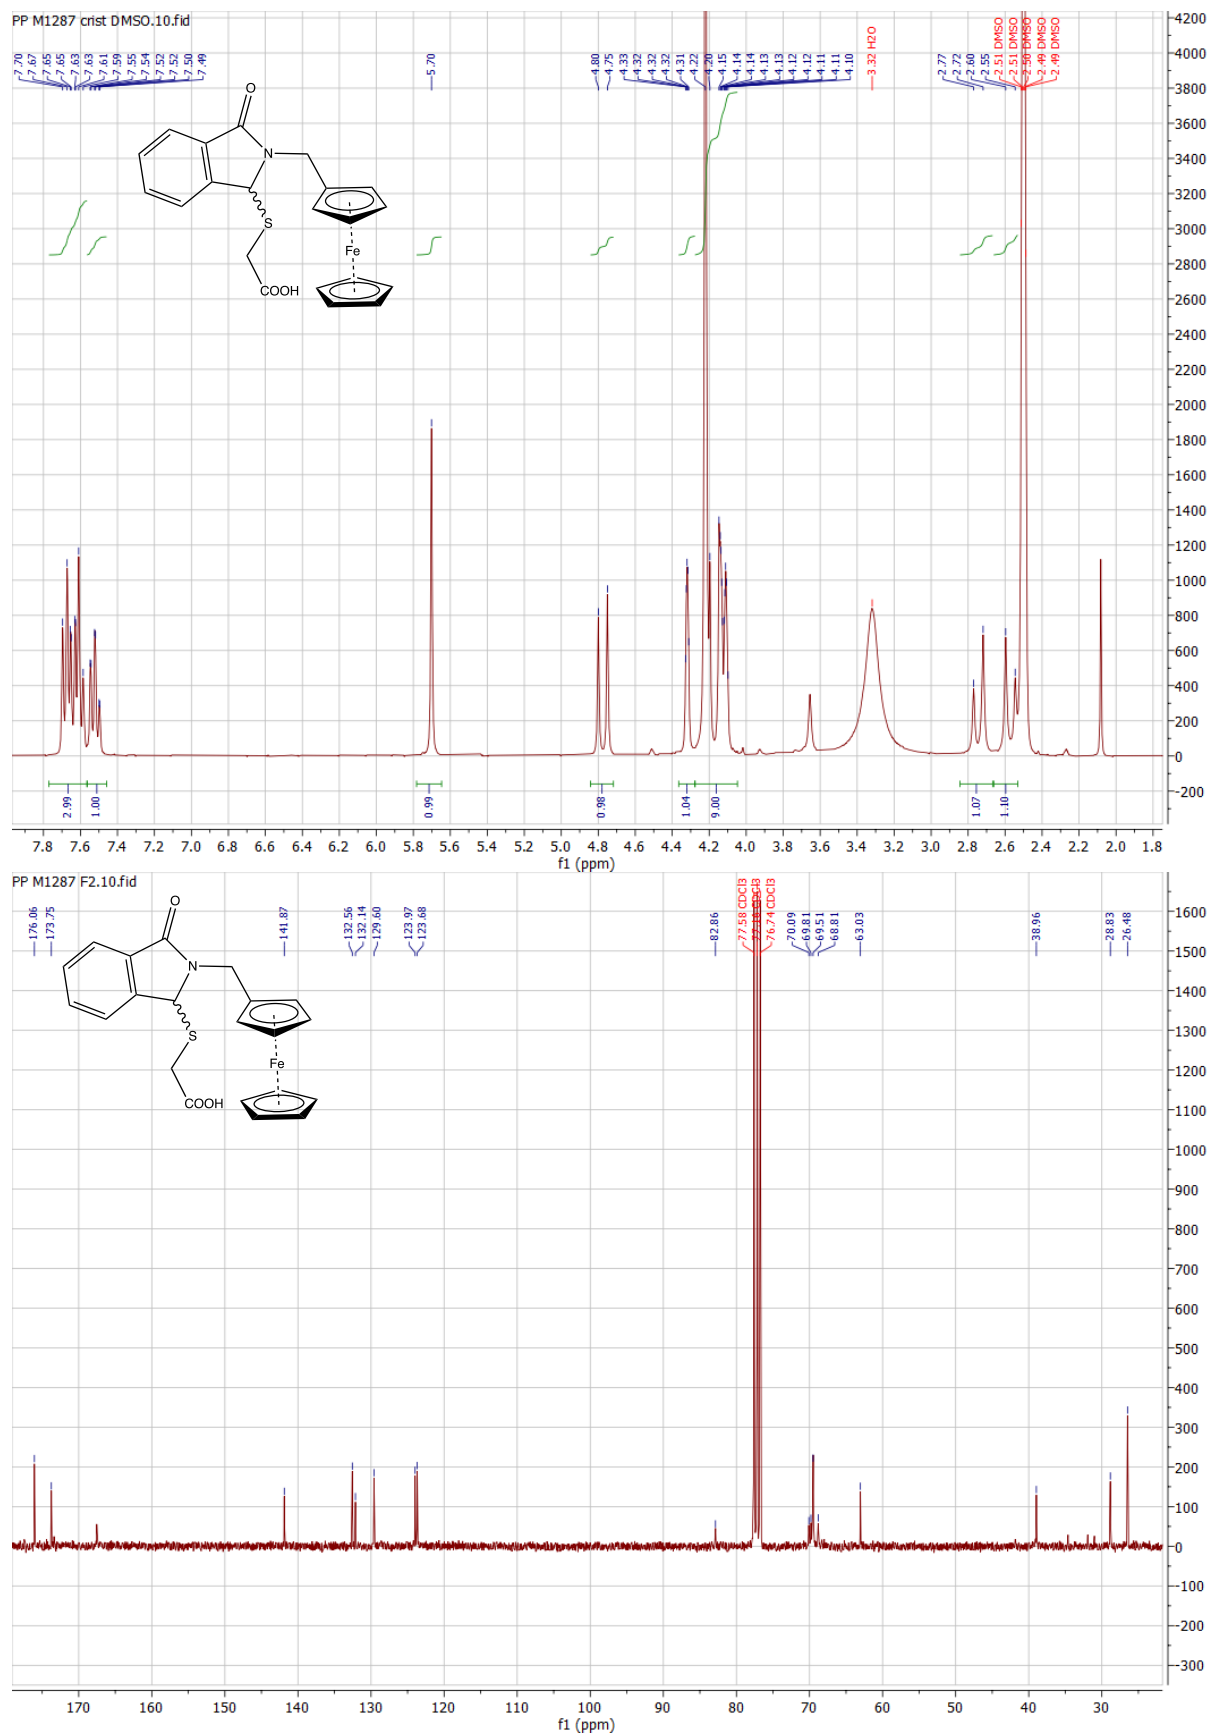



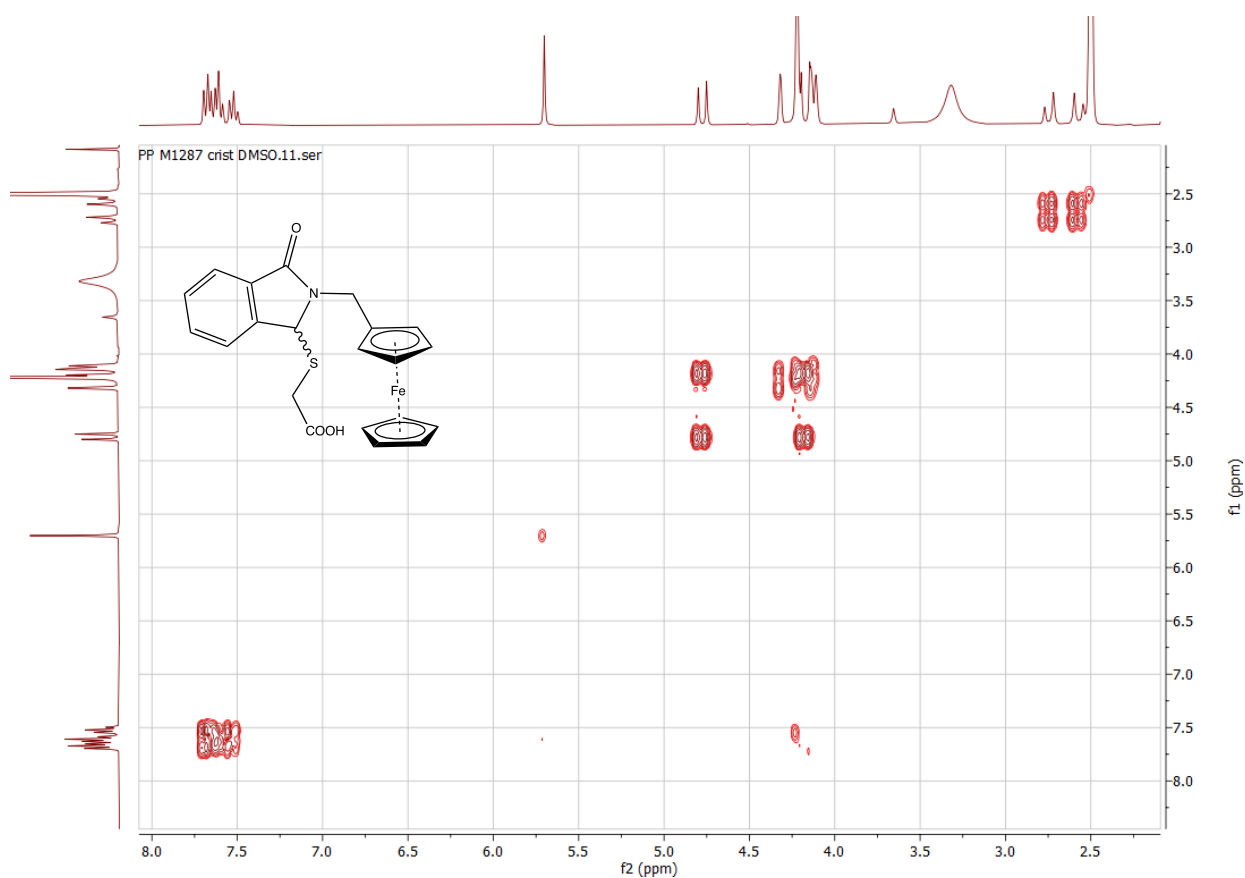

C:\Xcalibur\data\Analyses\H-10056neg  
MeCN

4/5/2022 10:50:04 AM

Pascal Pigeon P1015

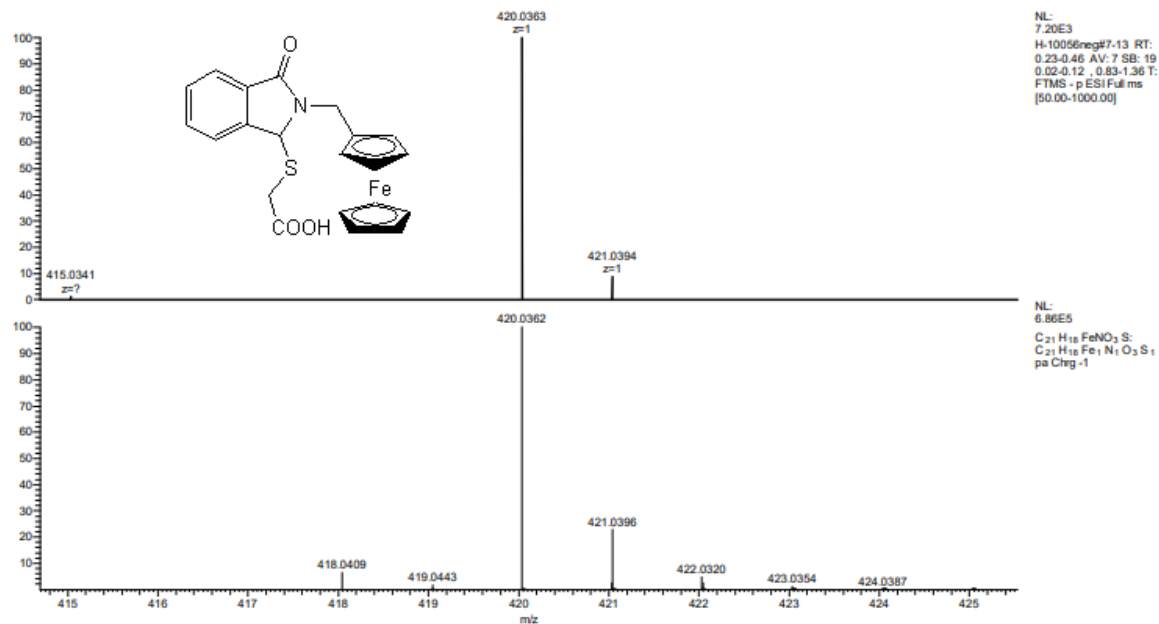

## Experimental/theoretical isotopic pattern MS spectrum

Error = 0.9 ppm; Relative Intensity (%) 100

HRMS (ESI) m/z: [M] 1- Calcd for C<sub>21</sub>H<sub>18</sub>FeNO<sub>3</sub>S 420.0362 . Found 420.0366; (Error: 0.9 ppm).

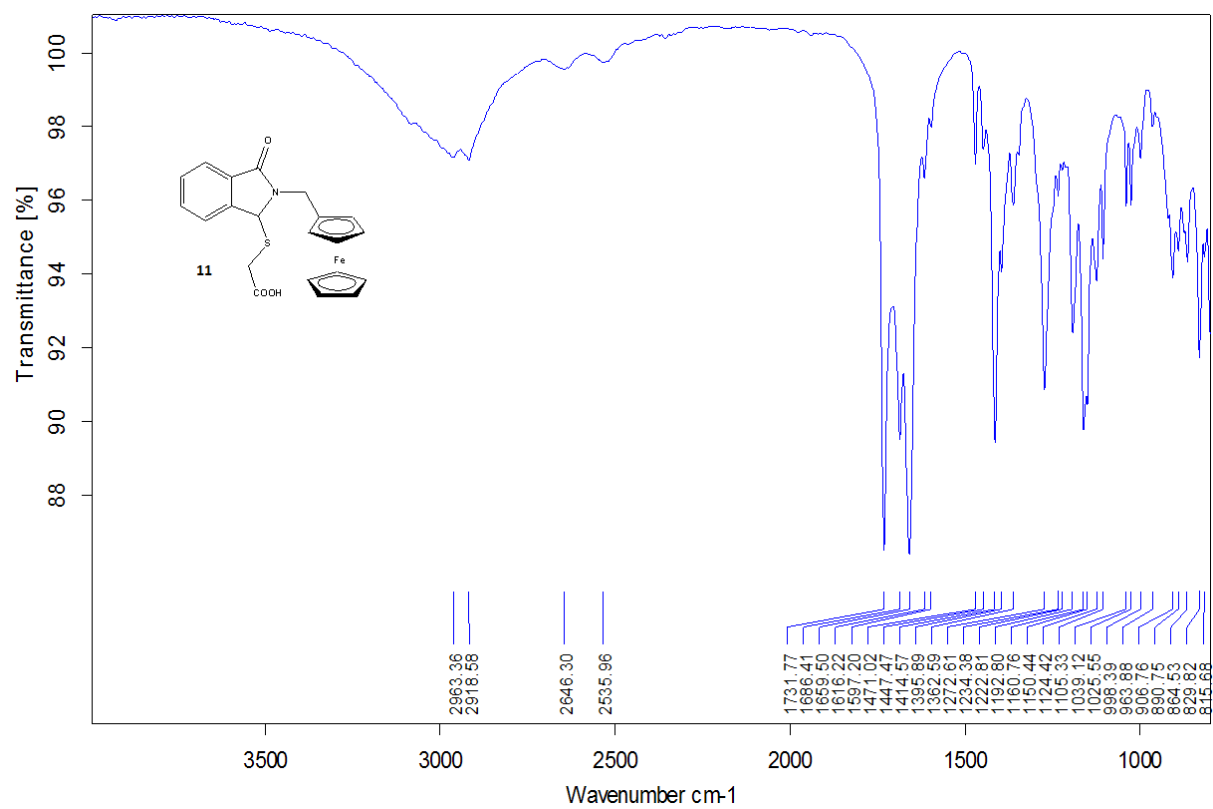

**Figure S37:**  $^1\text{H}$  (in  $\text{DMSO-d}_6$ ),  $^{13}\text{C}$  (in  $\text{DMSO-d}_6$ ) NMR, HR-MS and IR data for compound **13**

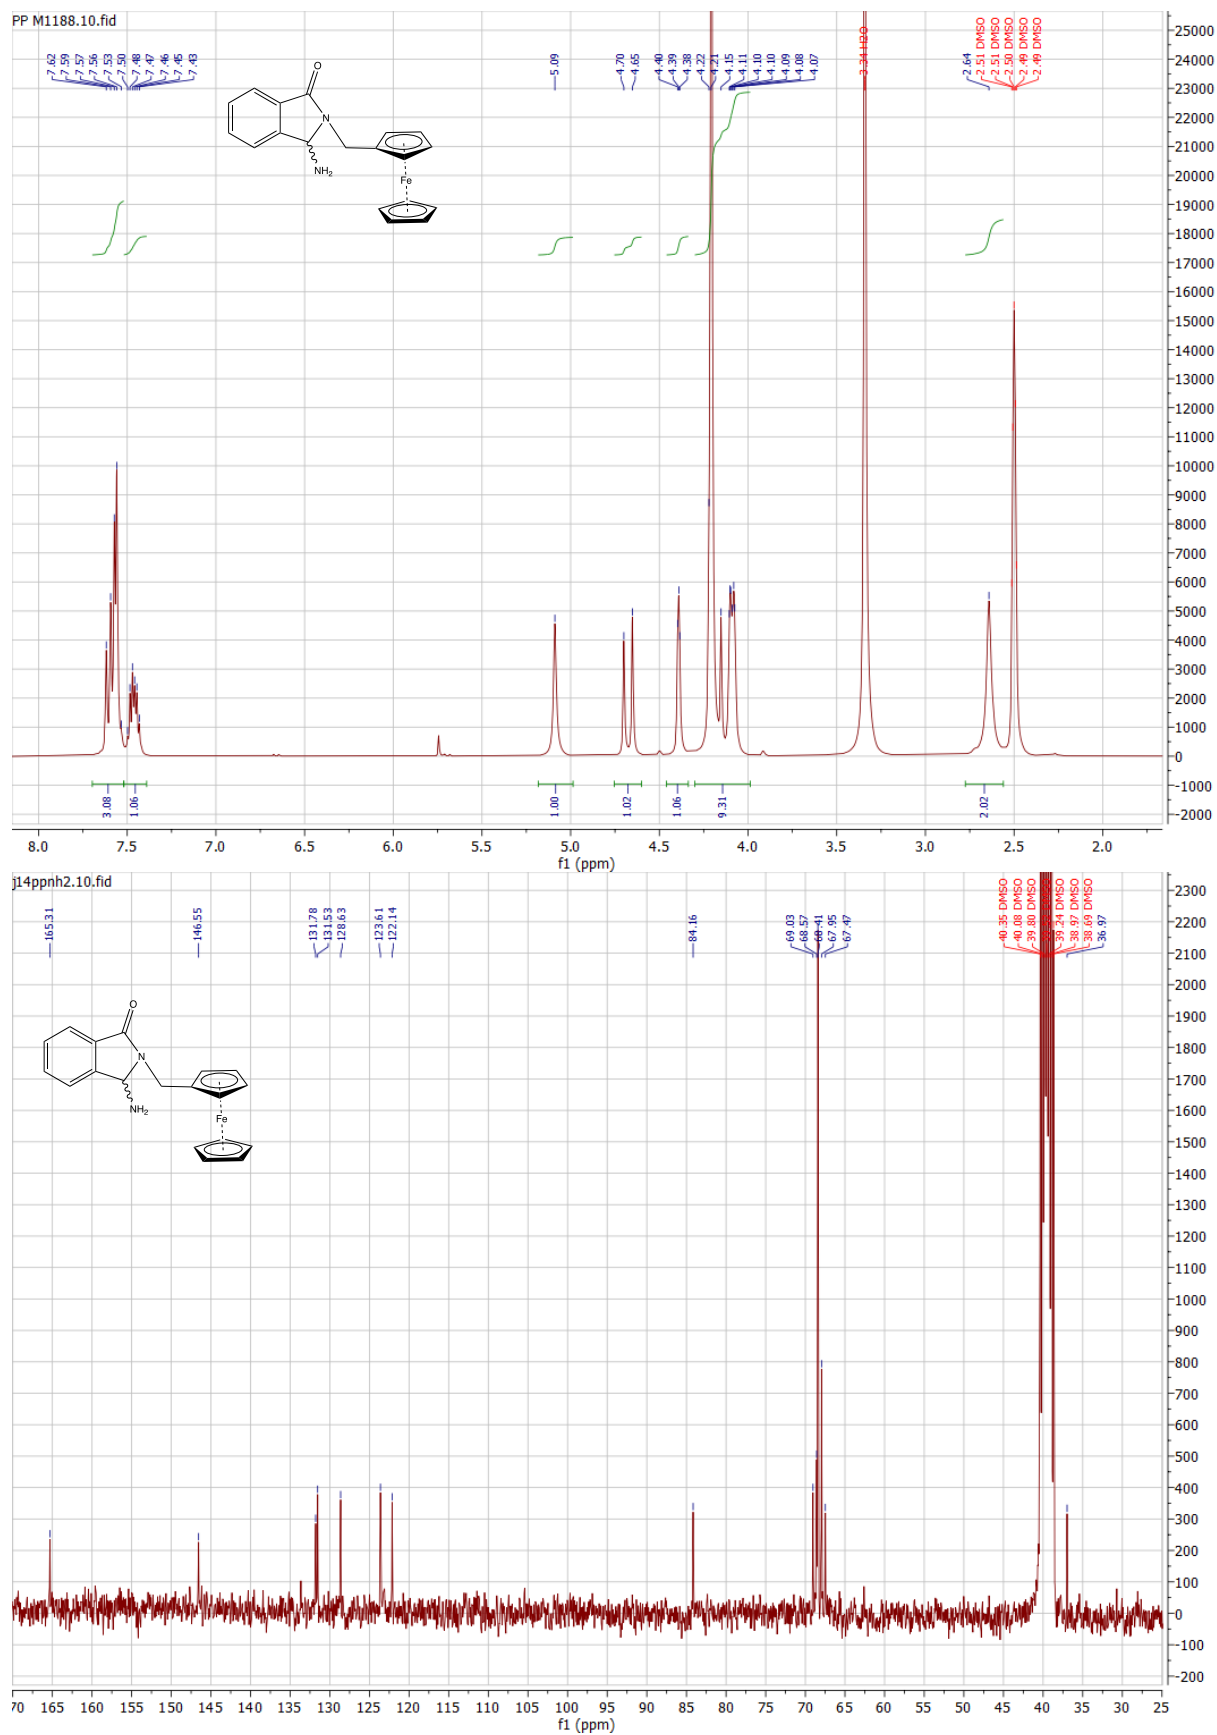

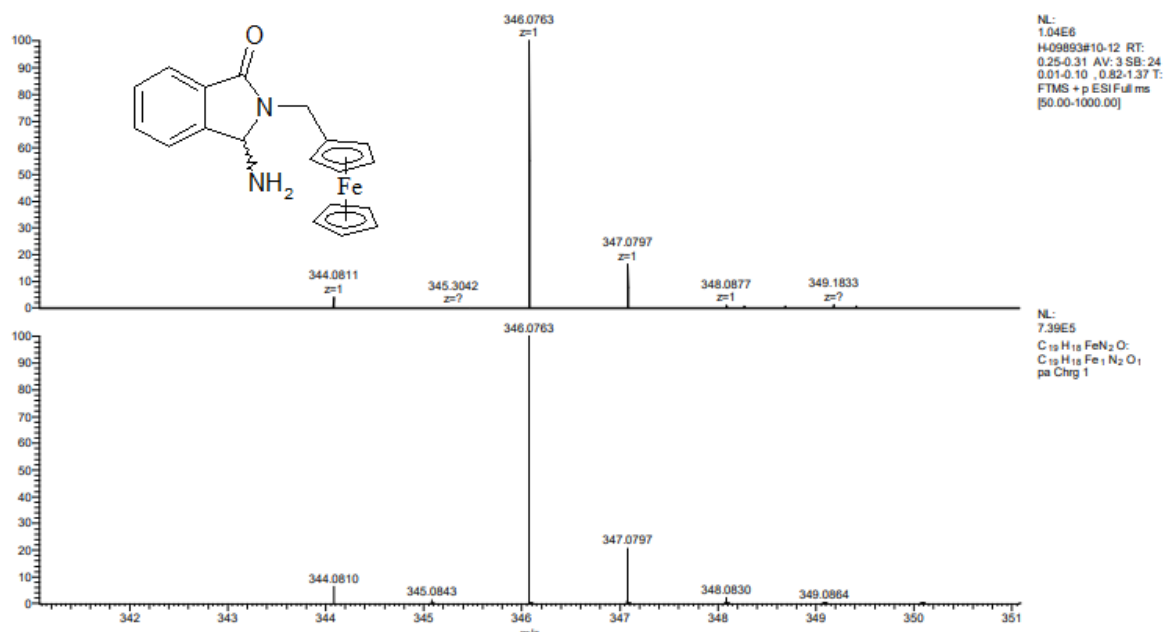

## Experimental/theoretical isotopic pattern MS spectrum

Error = 0.0 ppm; Relative Intensity (%) 100

HRMS (ESI) m/z: [M]<sup>+</sup> Calcd for C<sub>19</sub>H<sub>18</sub>FeN<sub>2</sub>O 346.0763 . Found 346.0763; (Error: 0.0 ppm).

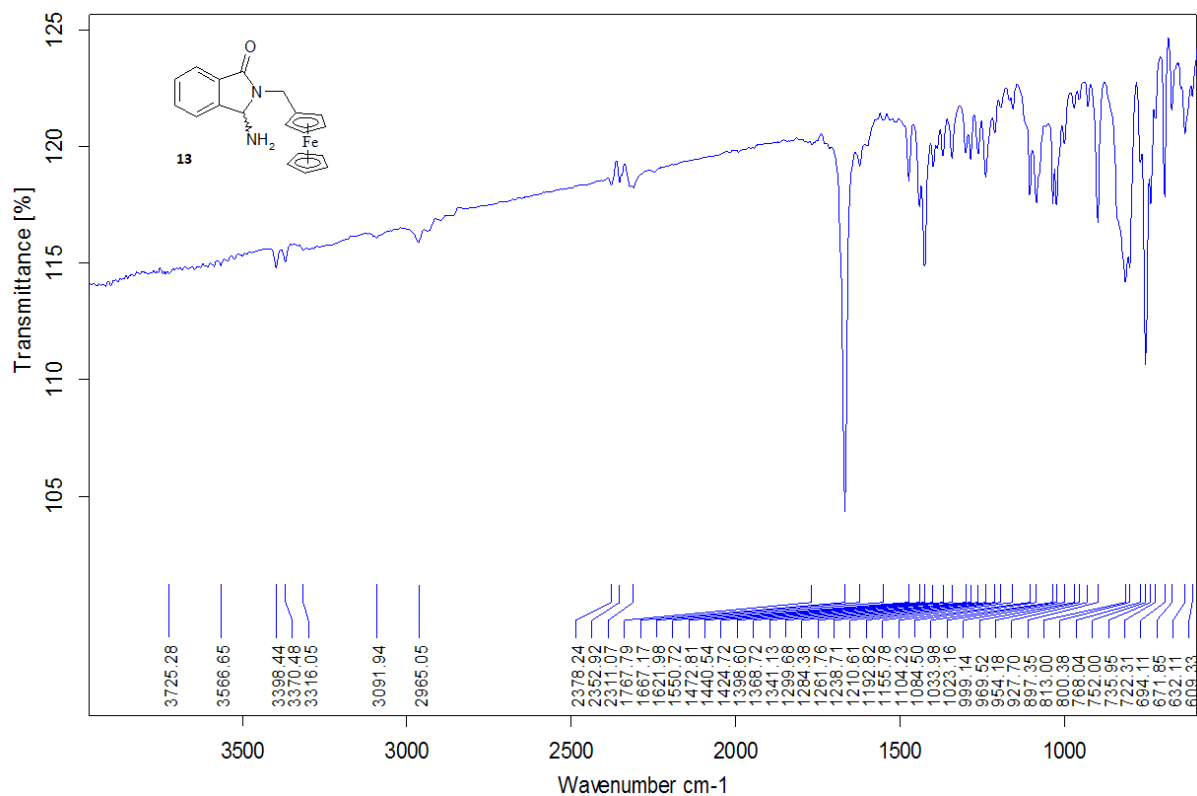

**Figure S38:**  $^1\text{H}$  (in  $\text{CDCl}_3$ ),  $^{13}\text{C}$  (in  $\text{CDCl}_3$ ) NMR, HR-MS and IR data for compound **14**

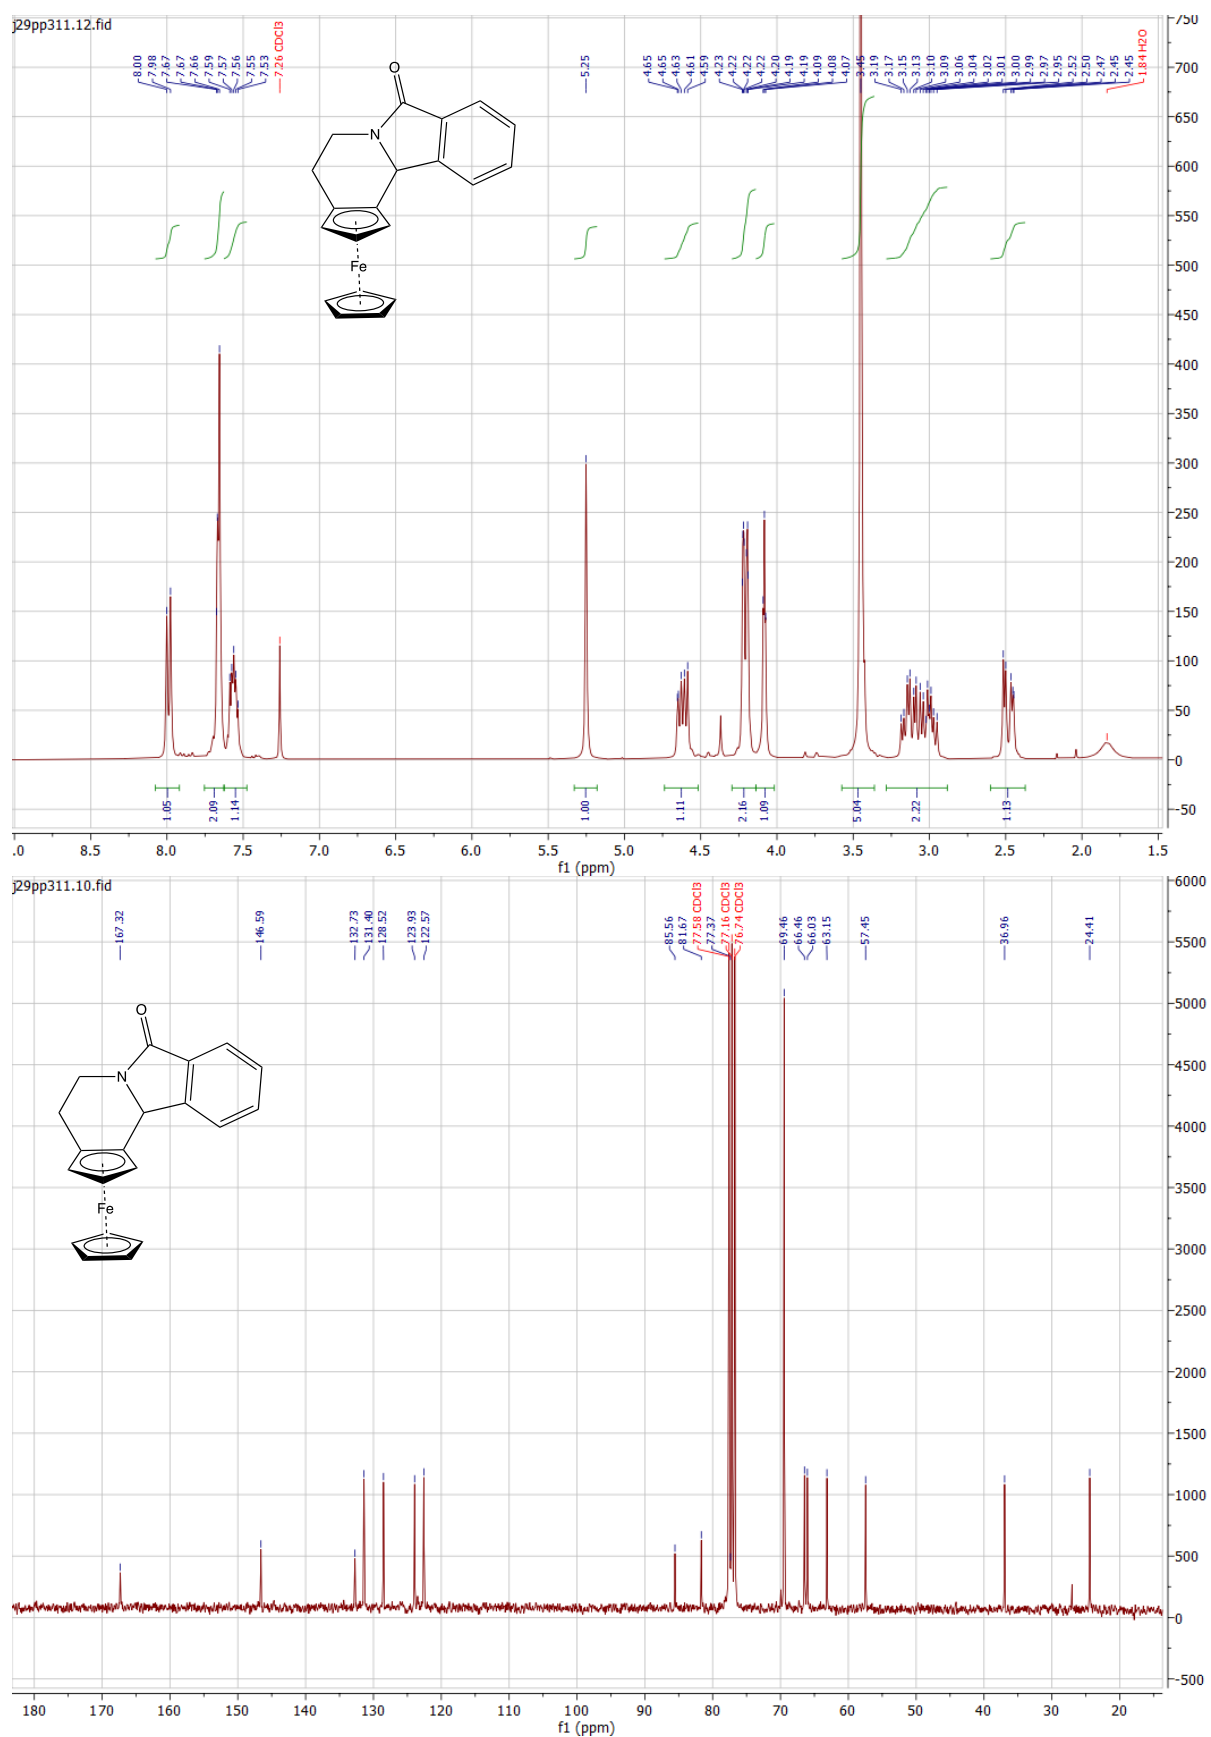

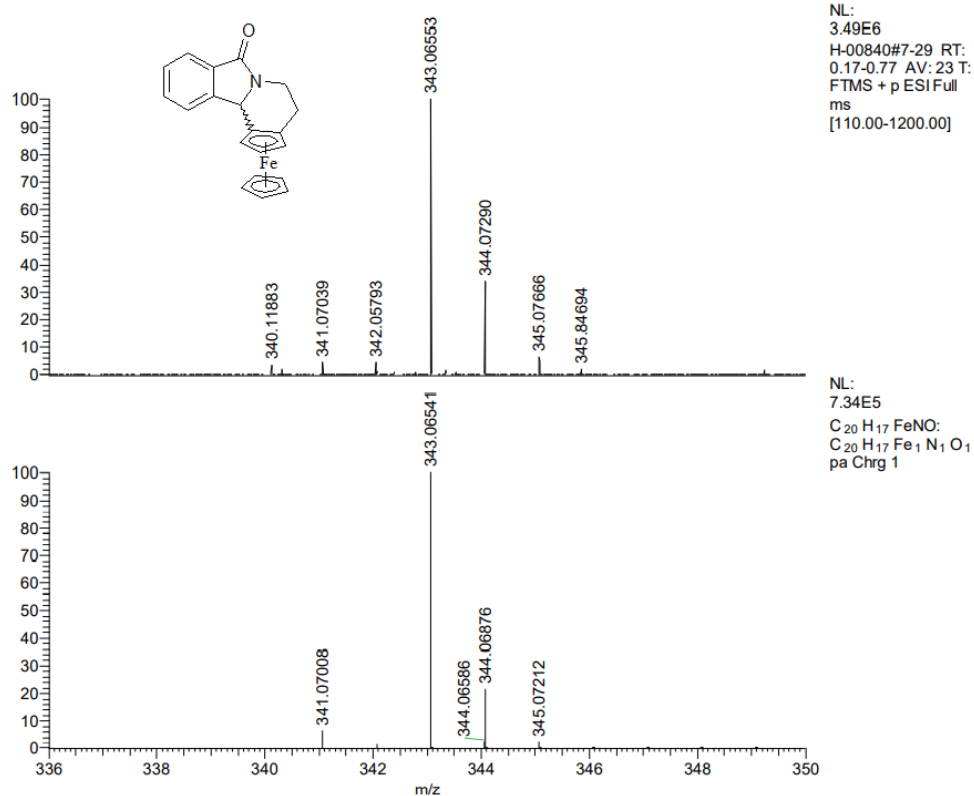

Erreur = 0.4 ppm (erreur calculée pour l'ion expérimental 343.06553 par rapport à la valeur théorique de 343.06541)

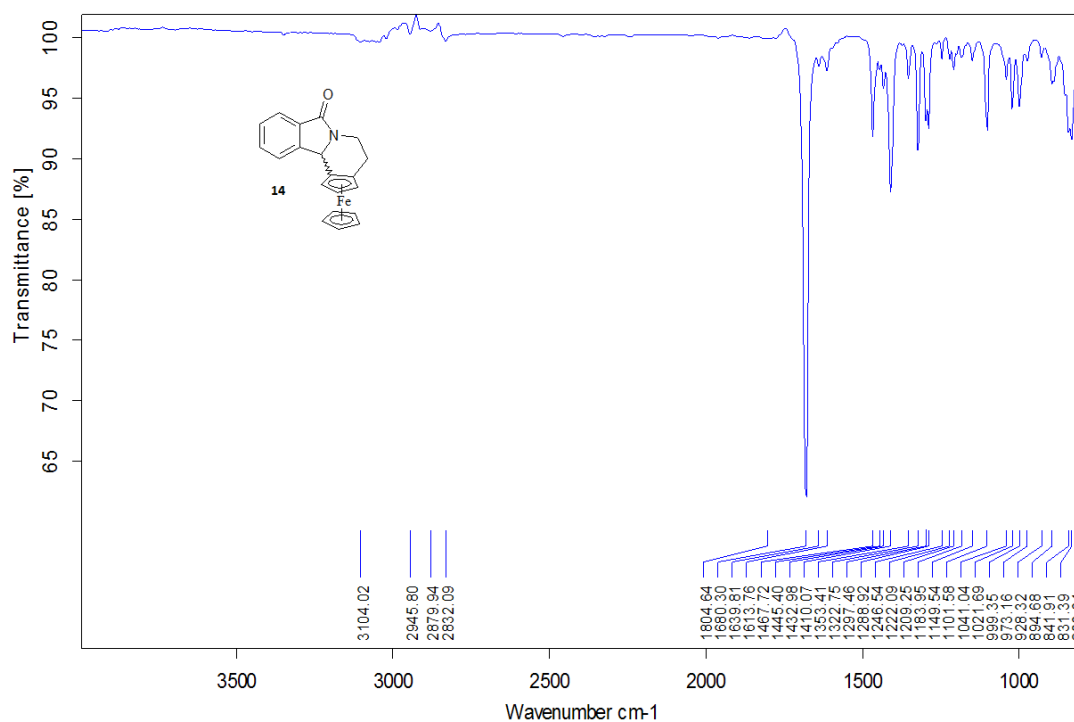

**Figure S39:**  $^1\text{H}$  (in  $\text{CDCl}_3$ ),  $^{13}\text{C}$  (in  $\text{CDCl}_3$ ), COSY (in  $\text{CDCl}_3$ ), HMQC (in  $\text{CDCl}_3$ ) NMR, HR-MS and IR data for compound **15**

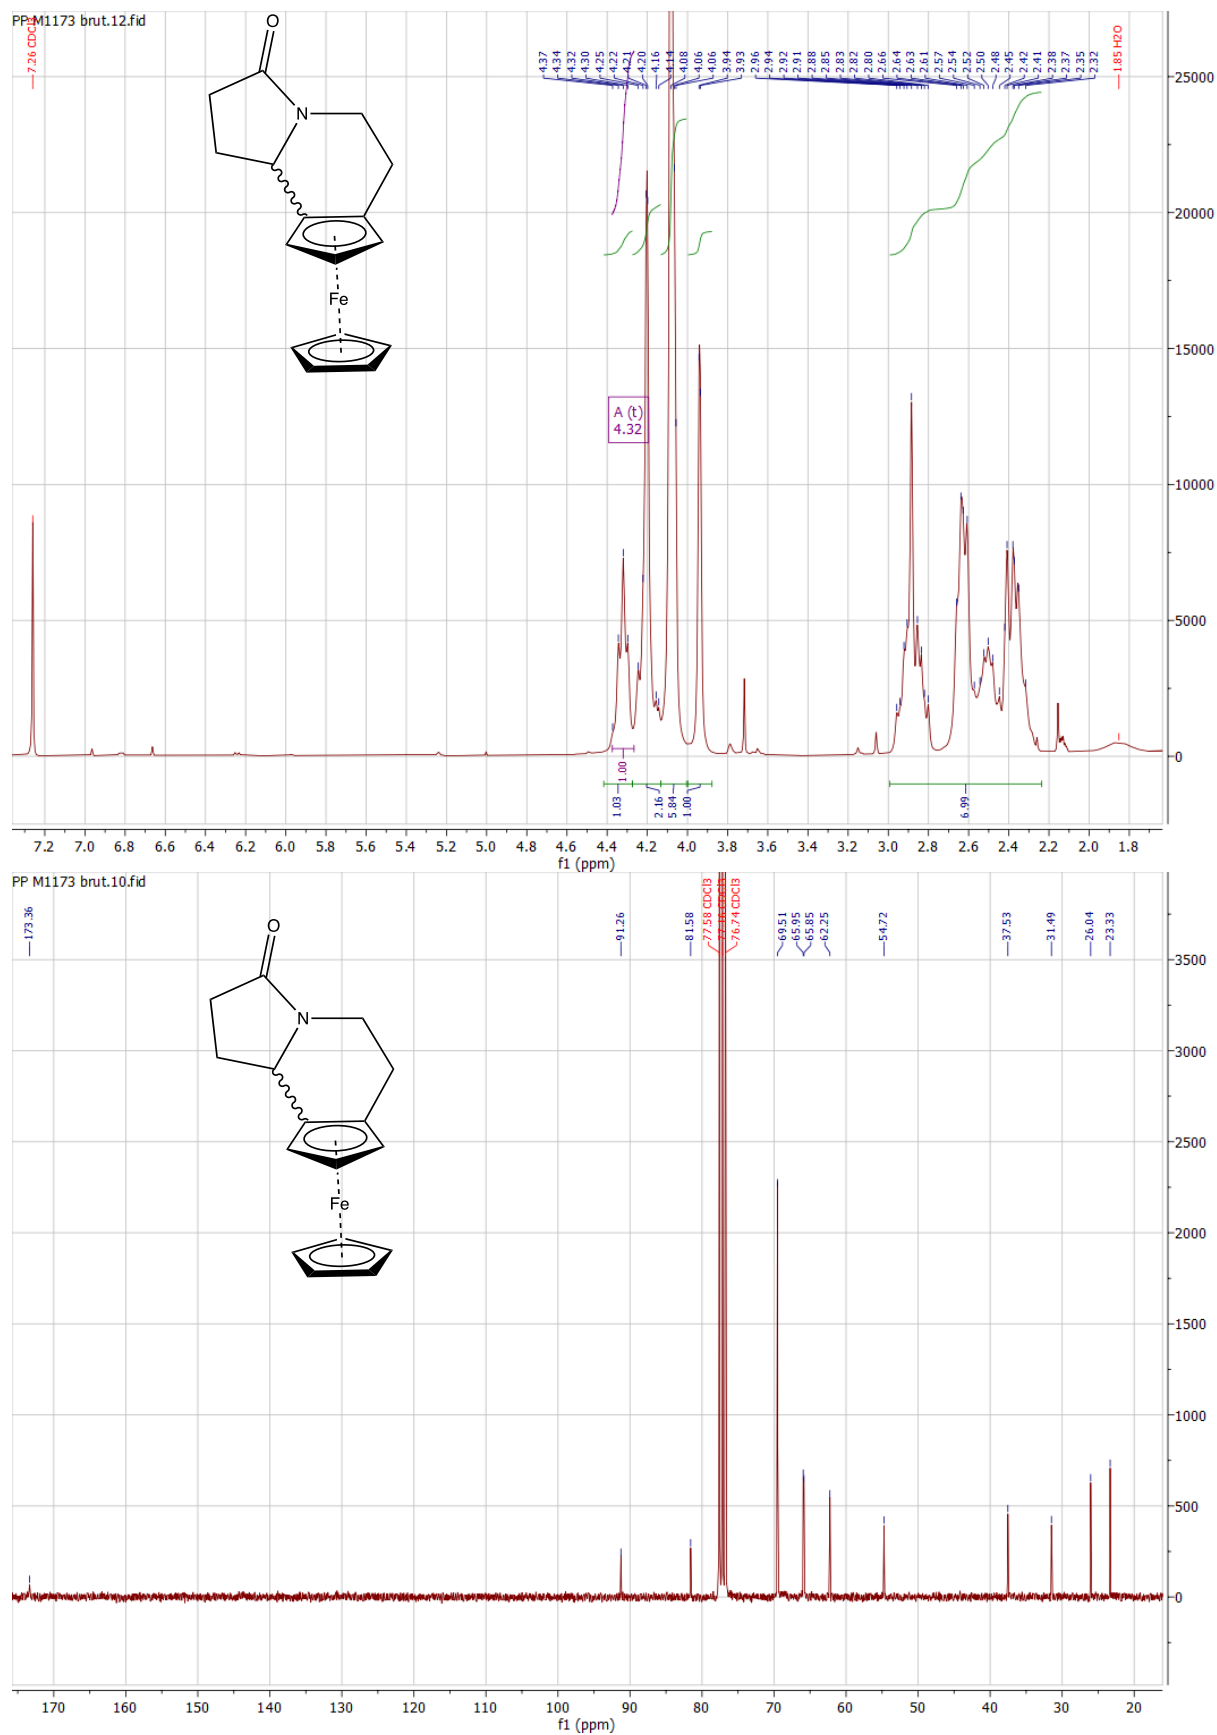

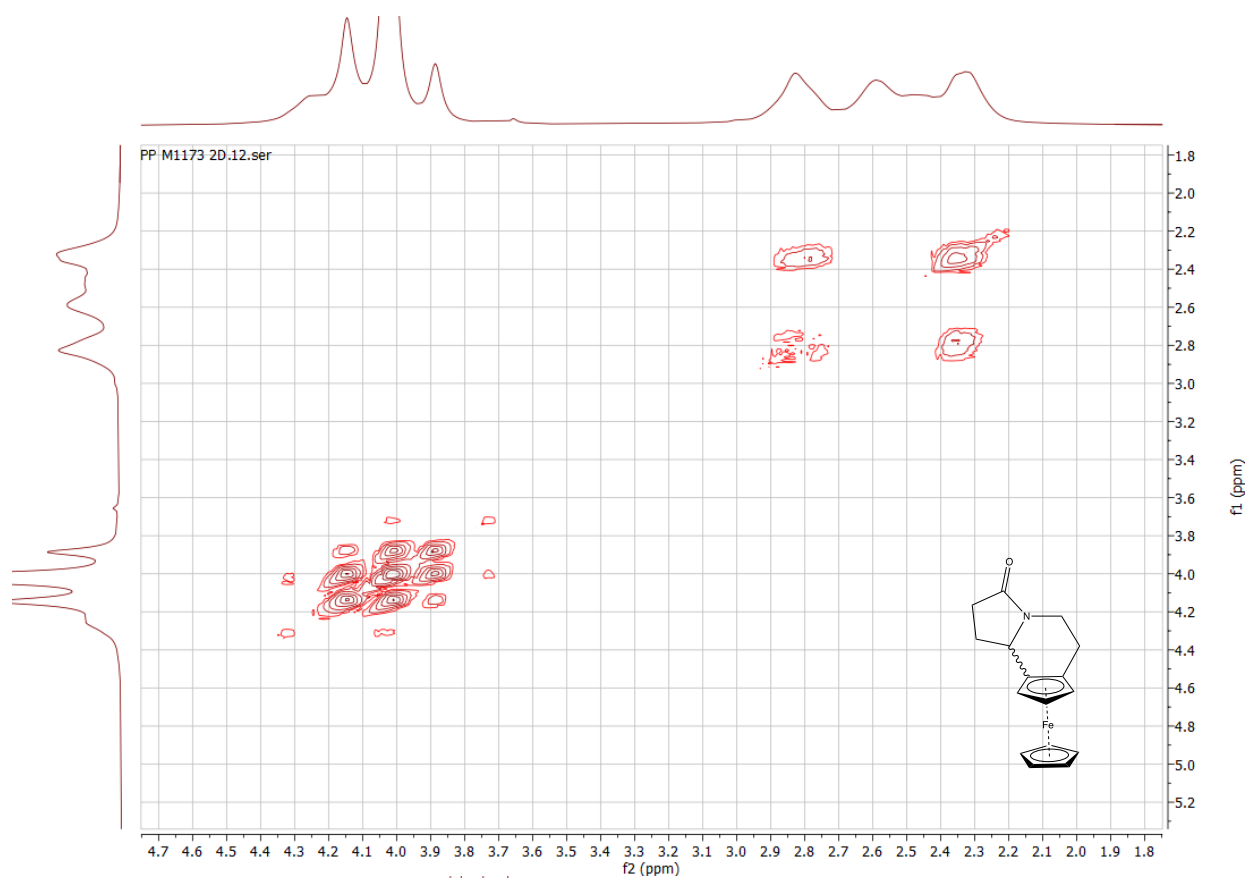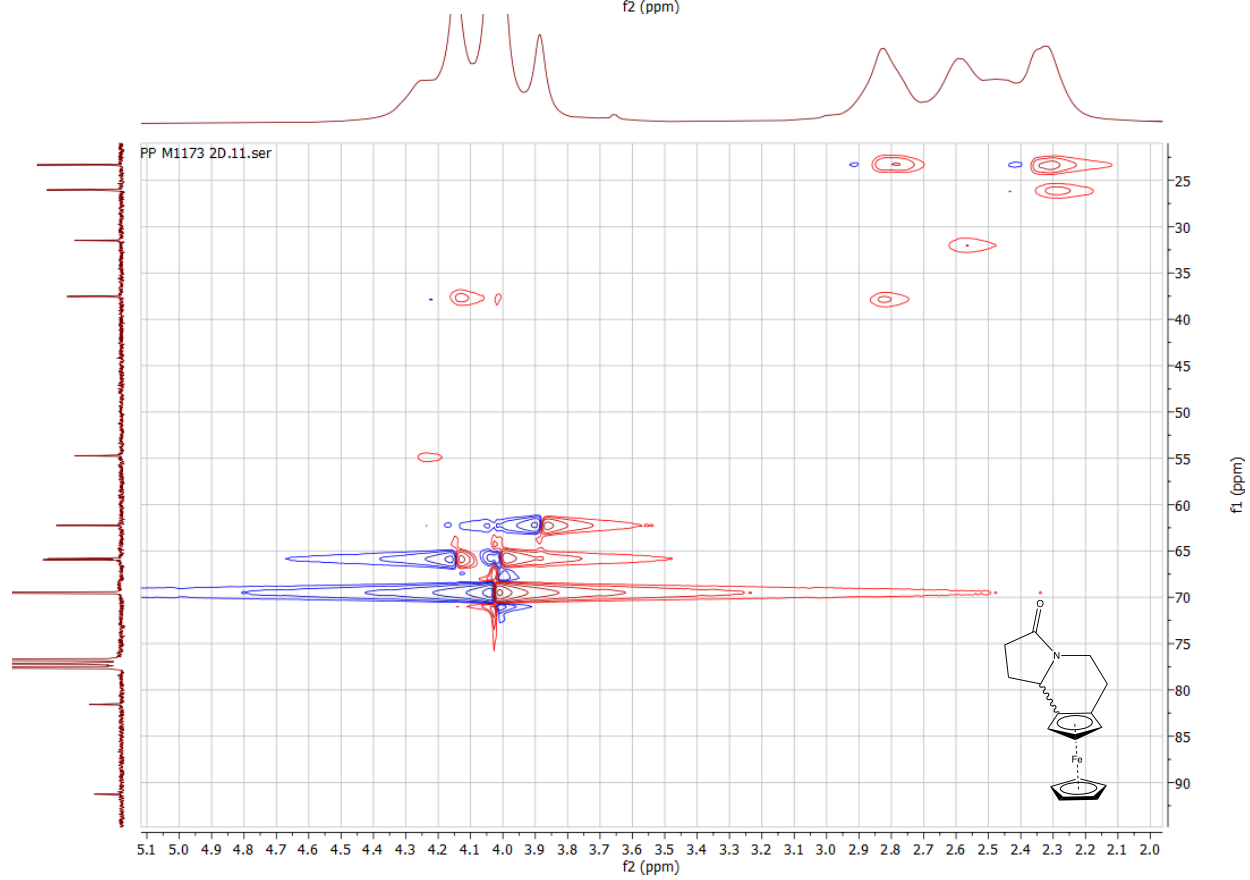



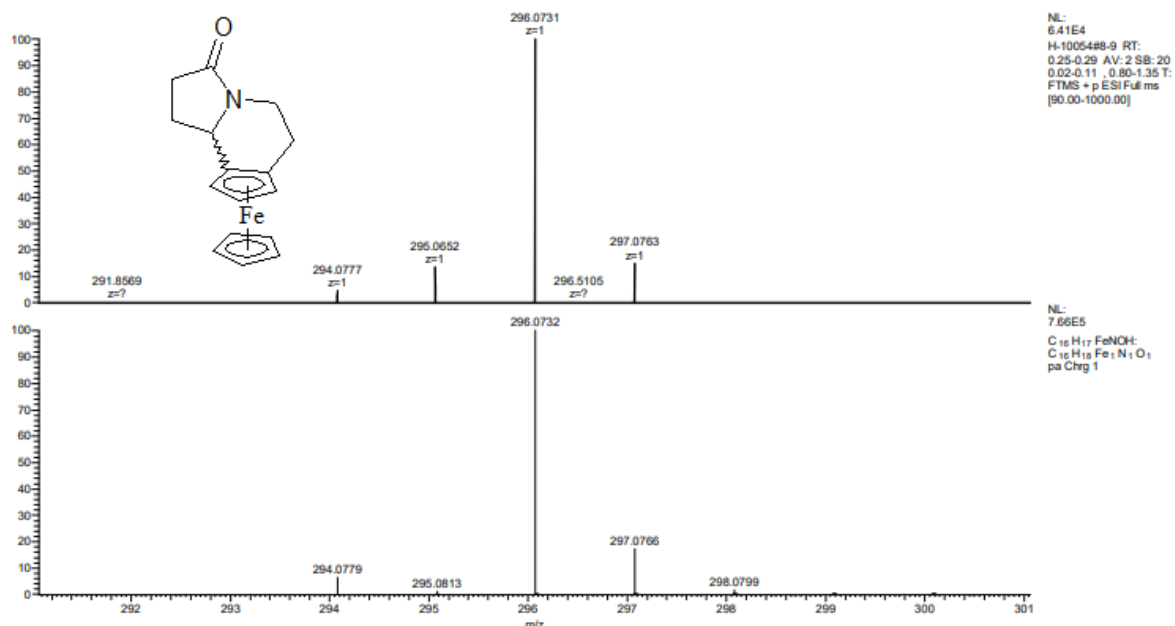

## Experimental/theoretical isotopic pattern MS spectrum

Error = -0.4 ppm; Relative Intensity (%) 100

HRMS (ESI) m/z: [M+H]<sup>+</sup> Calcd for C<sub>16</sub>H<sub>17</sub>FeNOH 296.0732. Found 296.0731; (Error: -0.4 ppm).

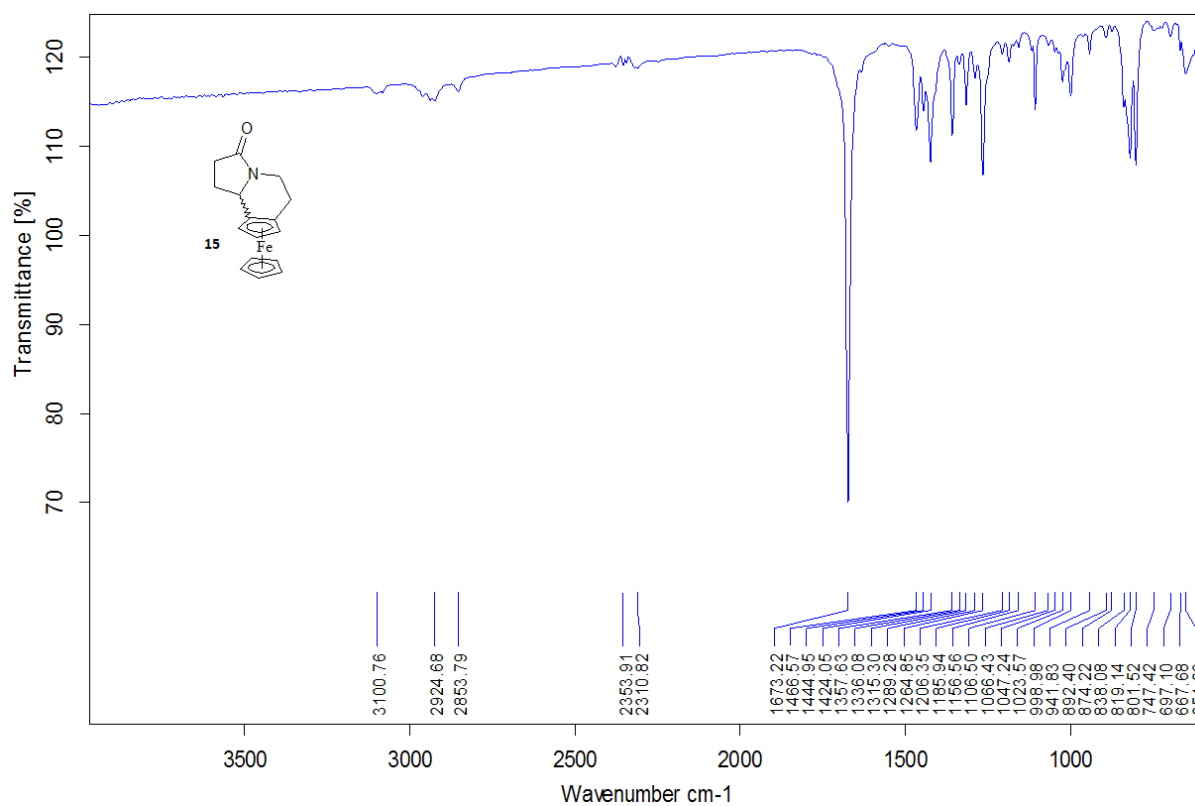

**Figure S40:**  $^1\text{H}$  (in  $\text{CDCl}_3$ ),  $^{13}\text{C}$  (in  $\text{CDCl}_3$ ), COSY (in  $\text{CDCl}_3$ ), HMQC (in  $\text{CDCl}_3$ ) NMR, HR-MS and IR data for compound **16**

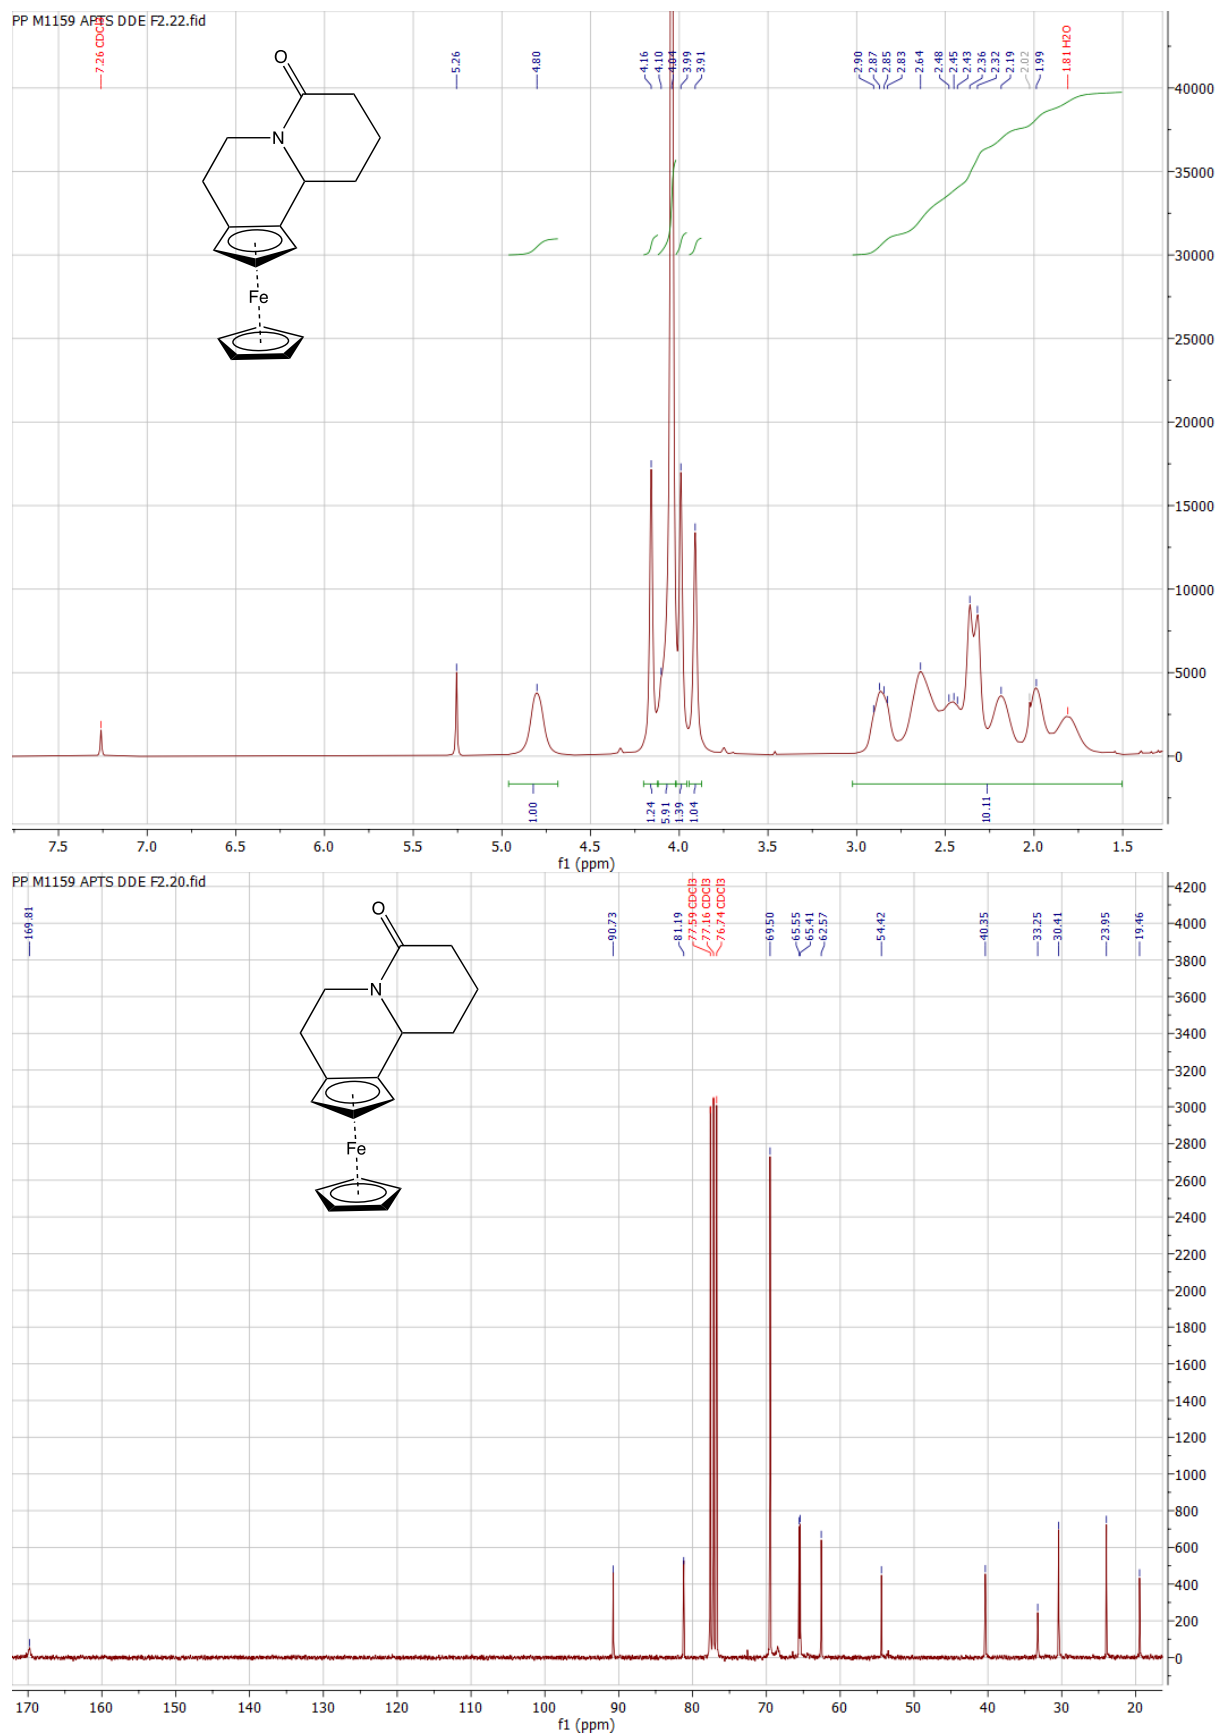

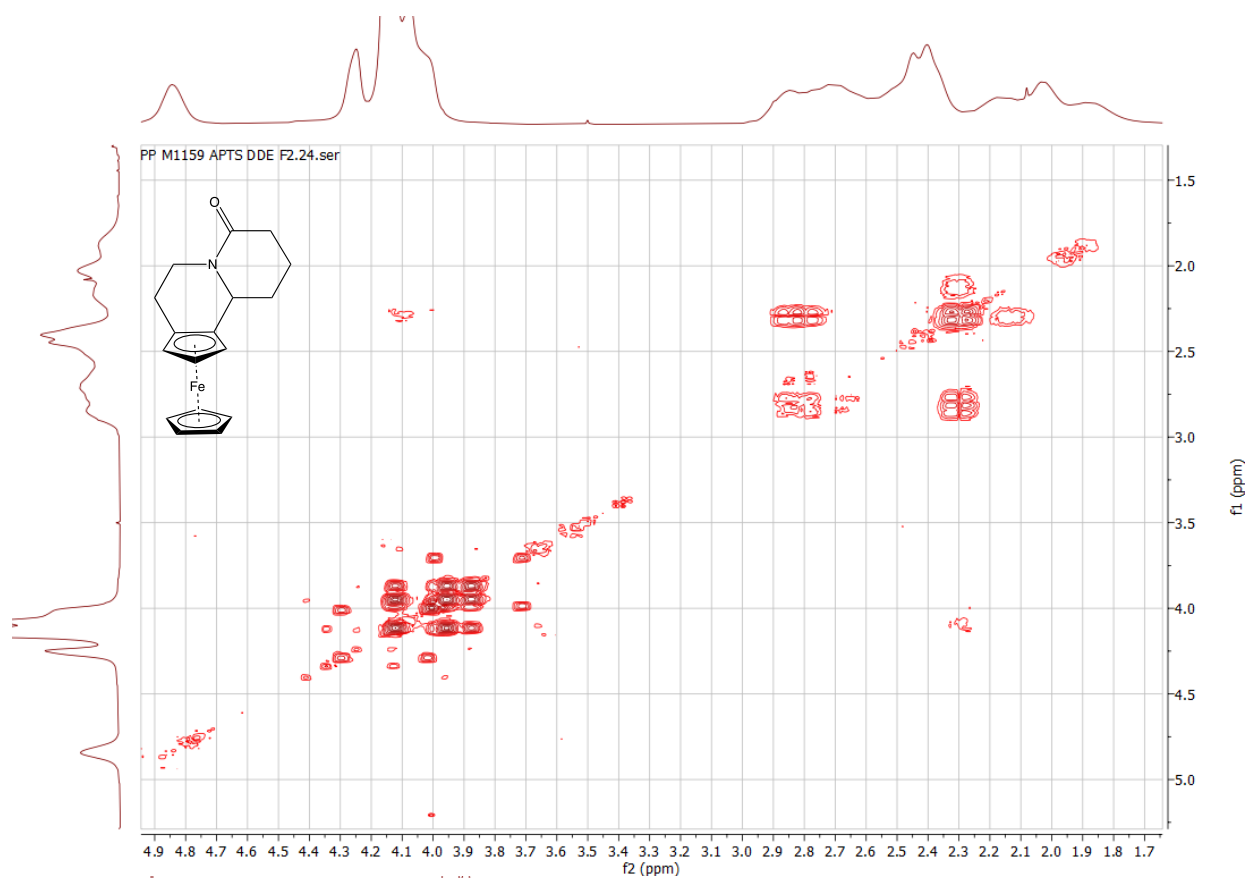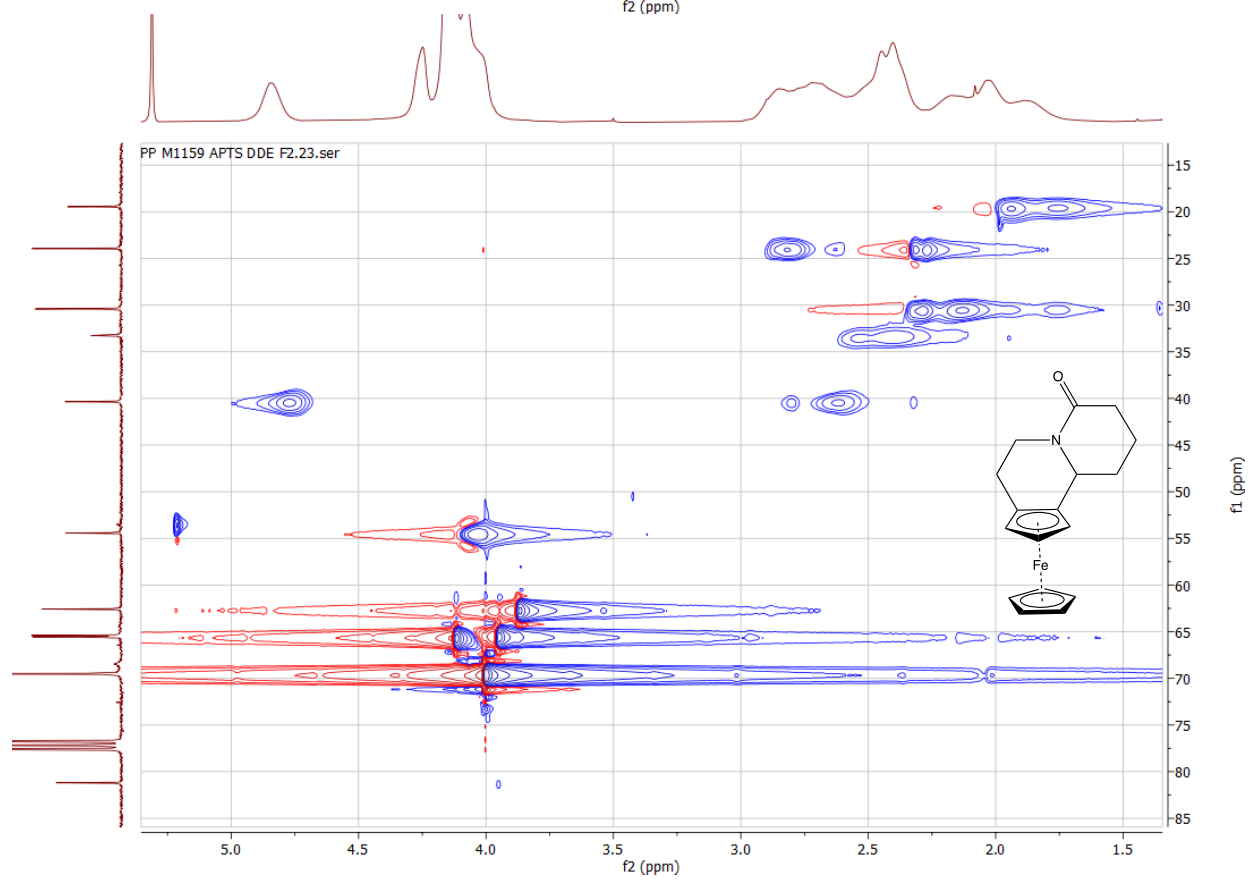

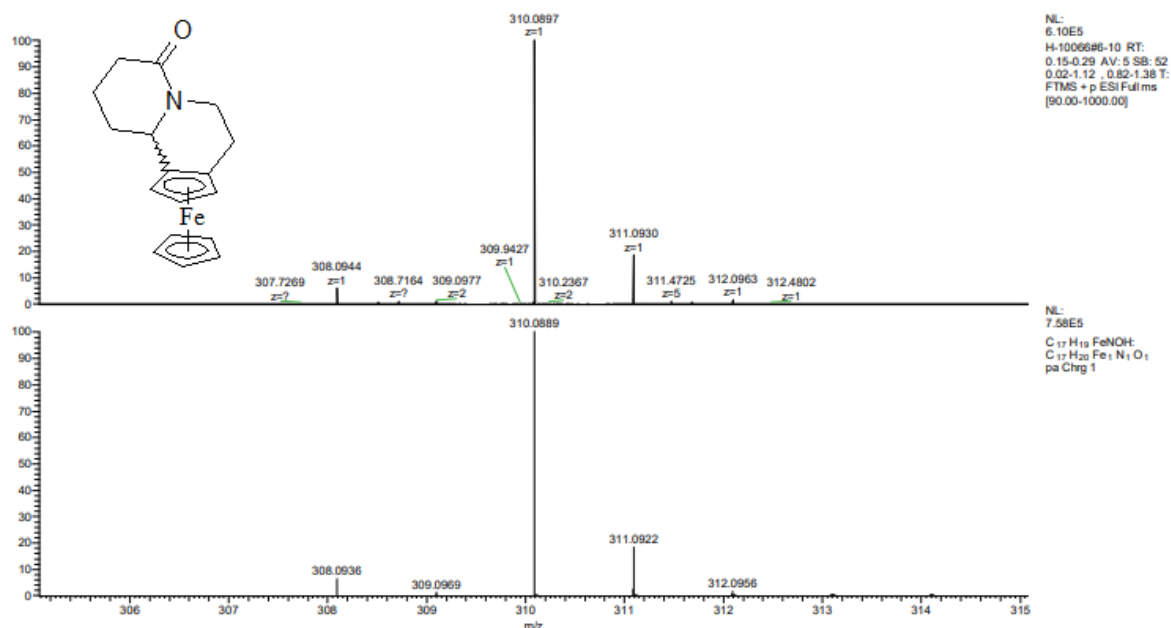

## Experimental/theoretical isotopic pattern MS spectrum

Error = 2.7 ppm; Relative Intensity (%) 100

HRMS (ESI) m/z: [M+H]<sup>+</sup> Calcd for C<sub>17</sub>H<sub>19</sub>FeNOH 310.0889. Found 310.0897; (Error: 2.7 ppm).

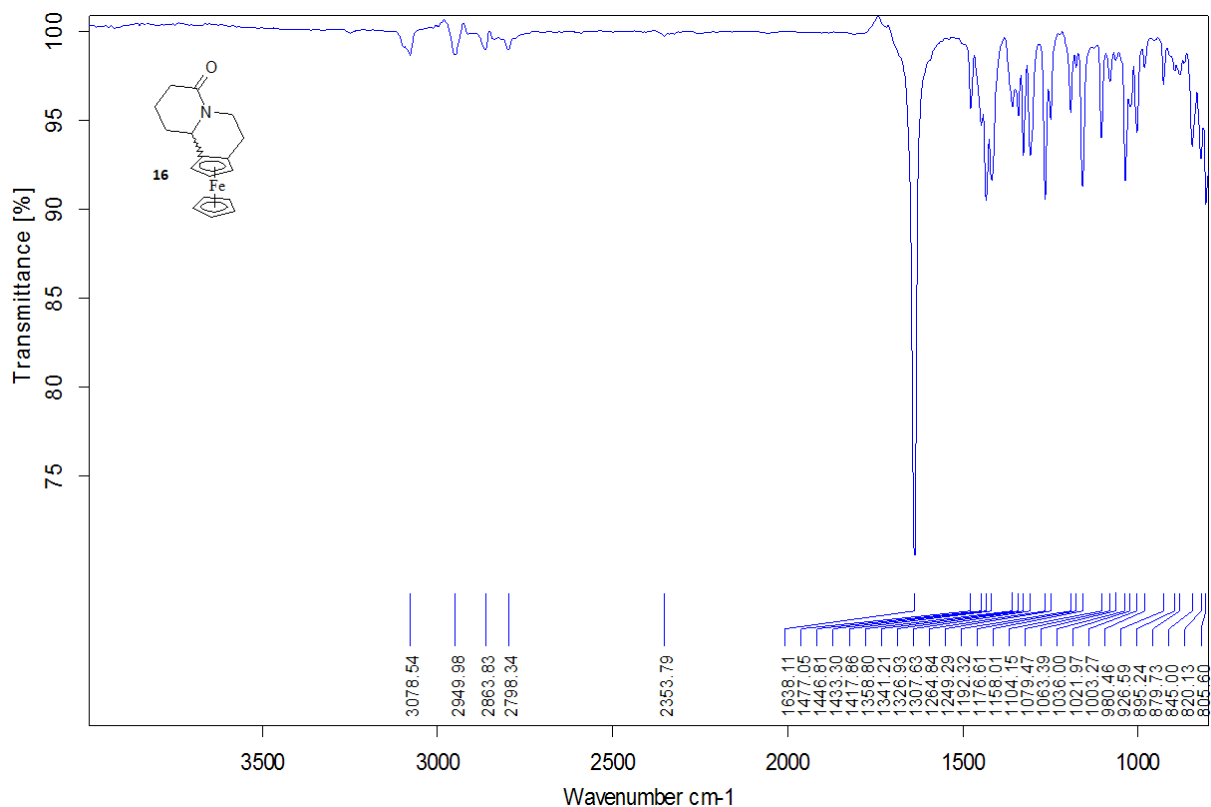

**Figure S41:**  $^1\text{H}$  (in  $\text{DMSO-d}_6$ ),  $^{13}\text{C}$  (in  $\text{DMSO-d}_6$ ) and COSY (in  $\text{DMSO-d}_6$ ) NMR and IR data for compound **17**

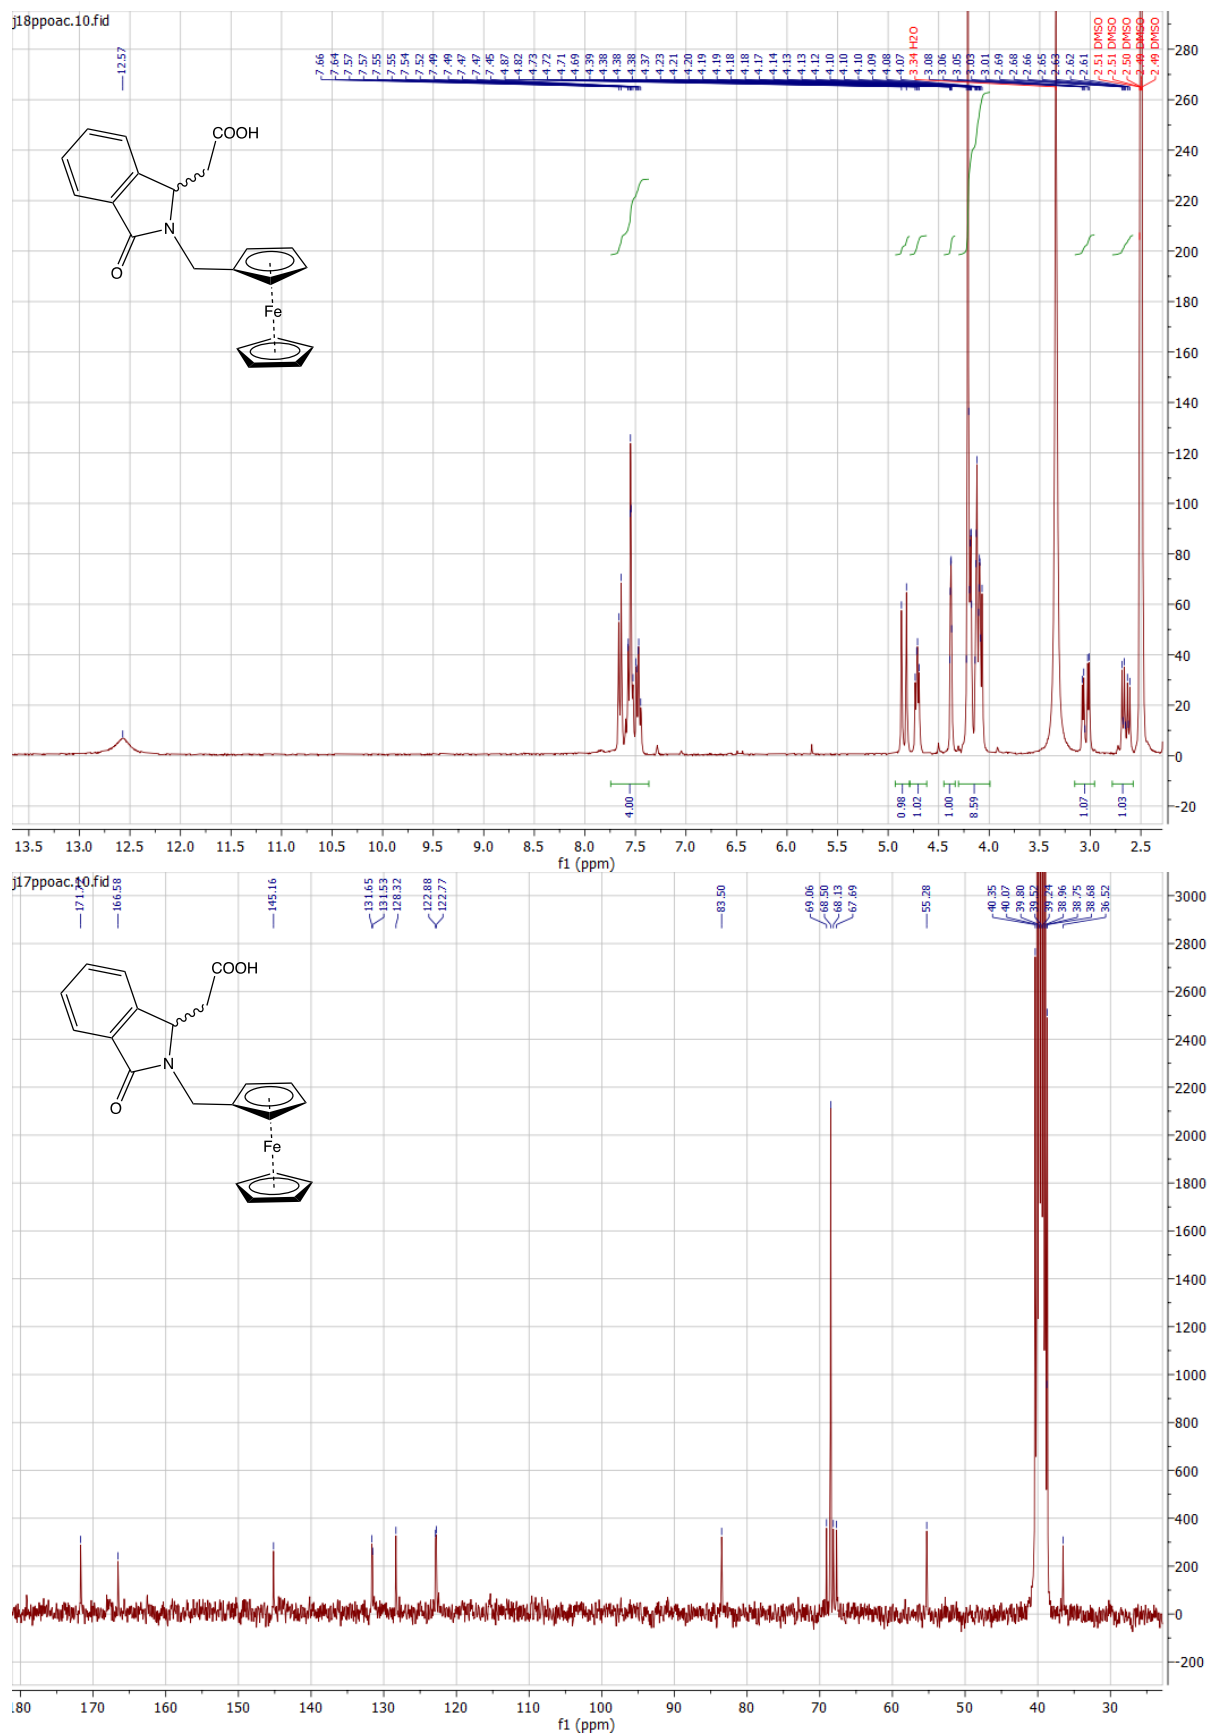

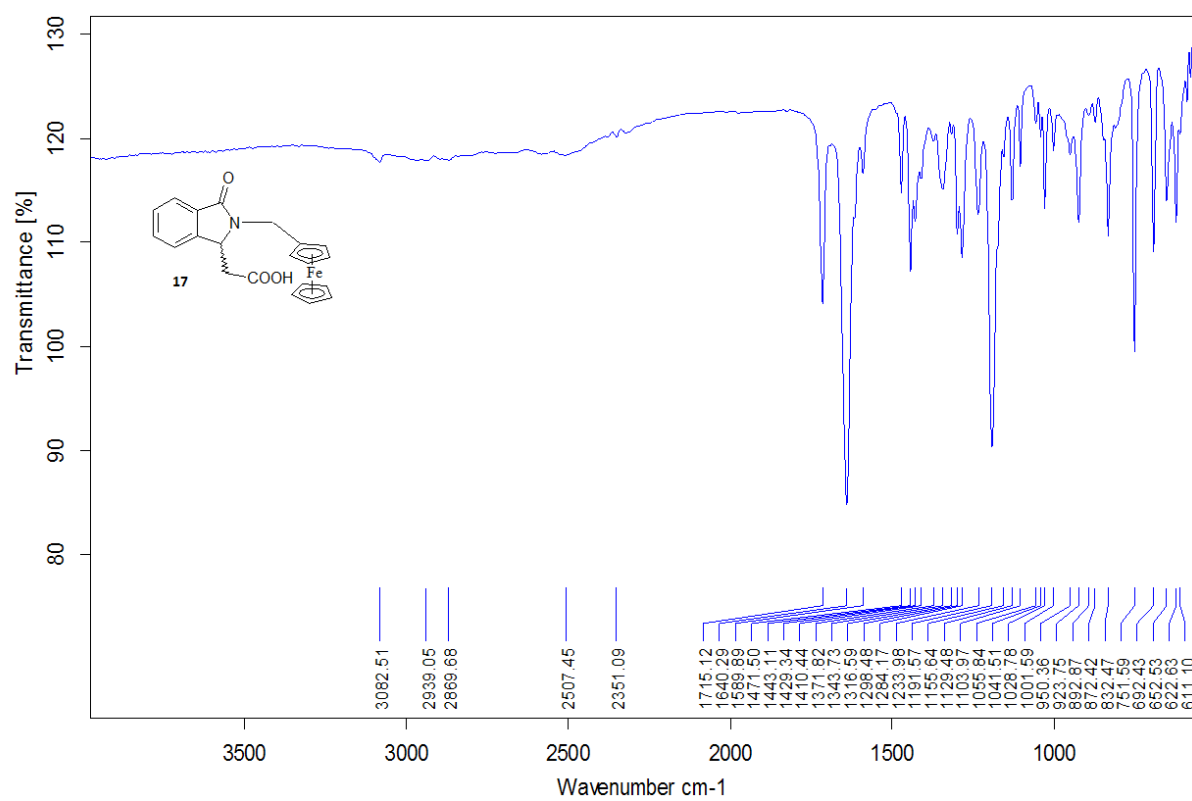

**Figure S42:**  $^1\text{H}$  (in  $\text{DMSO-d}_6$ ) and  $^{13}\text{C}$  (in  $\text{DMSO-d}_6$ ) NMR, HR-MS and IR data for compound **20**

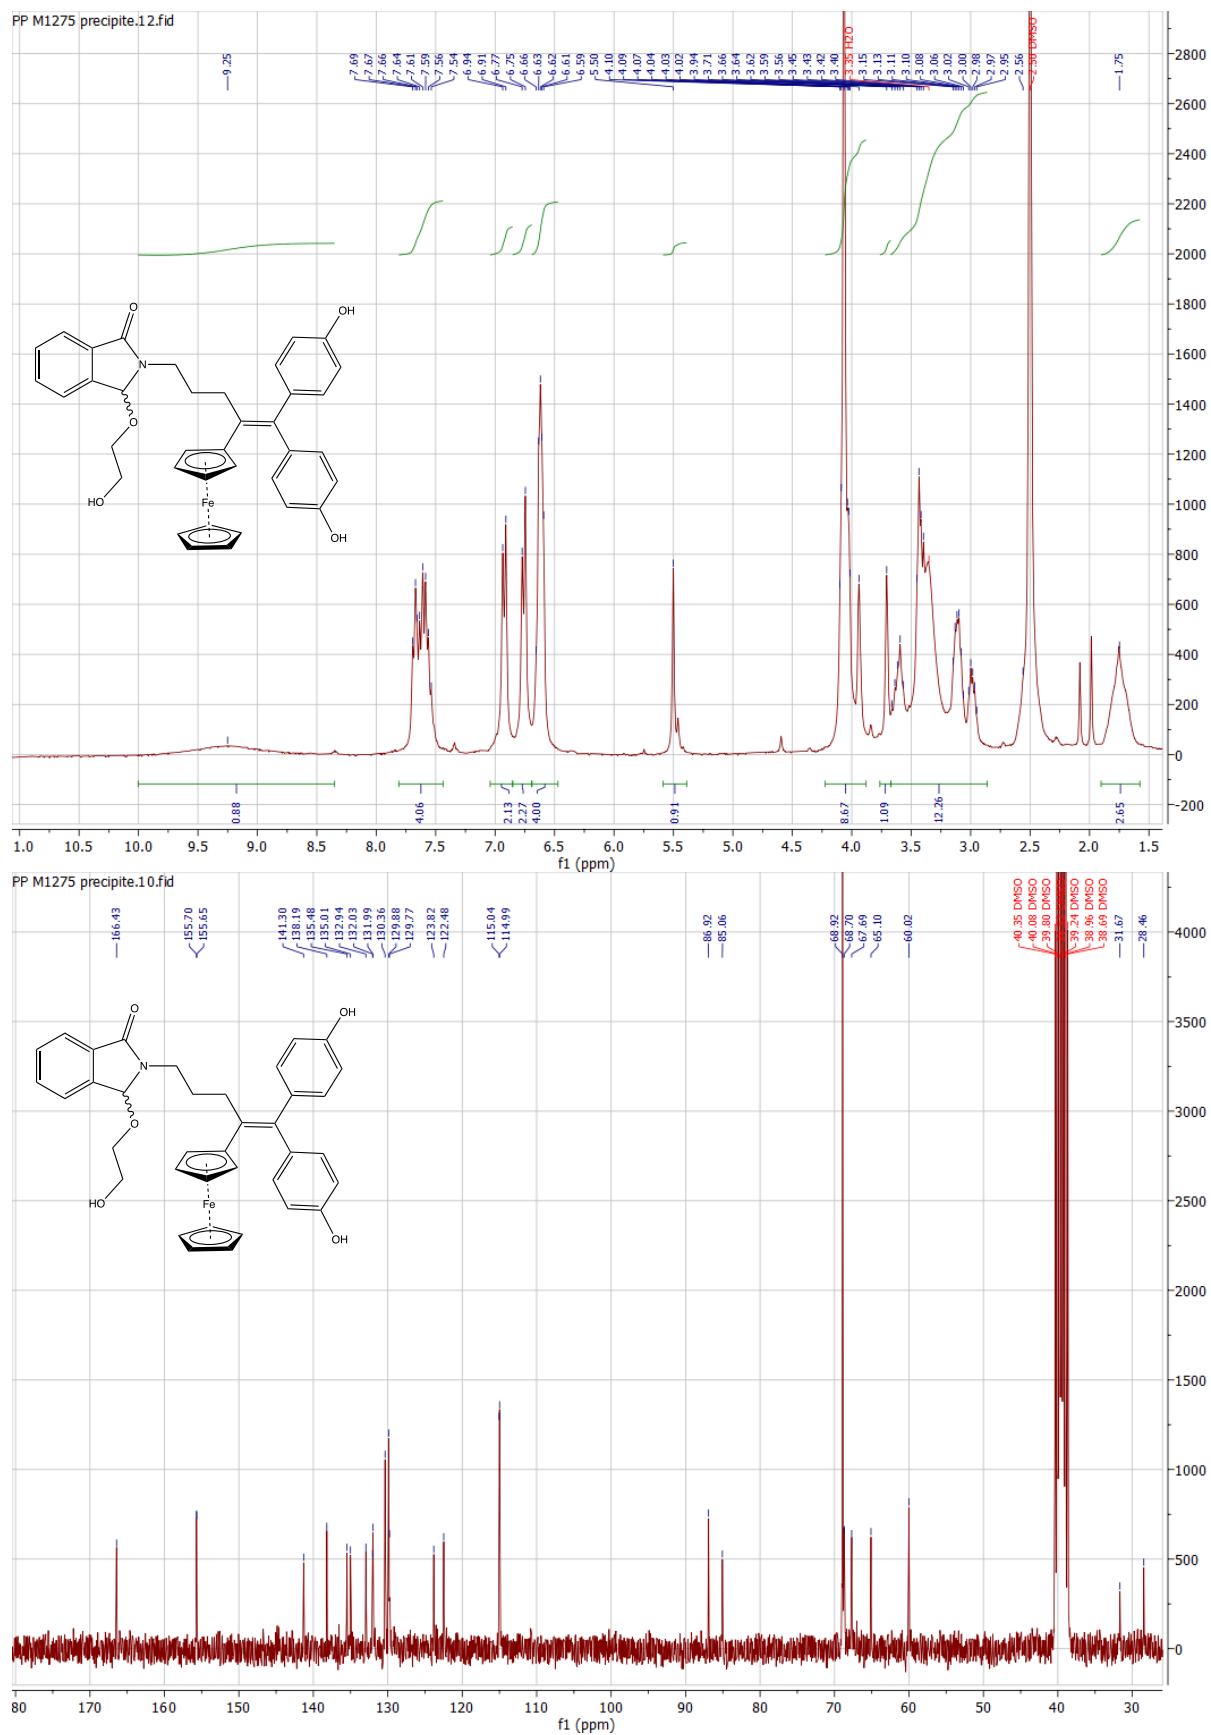

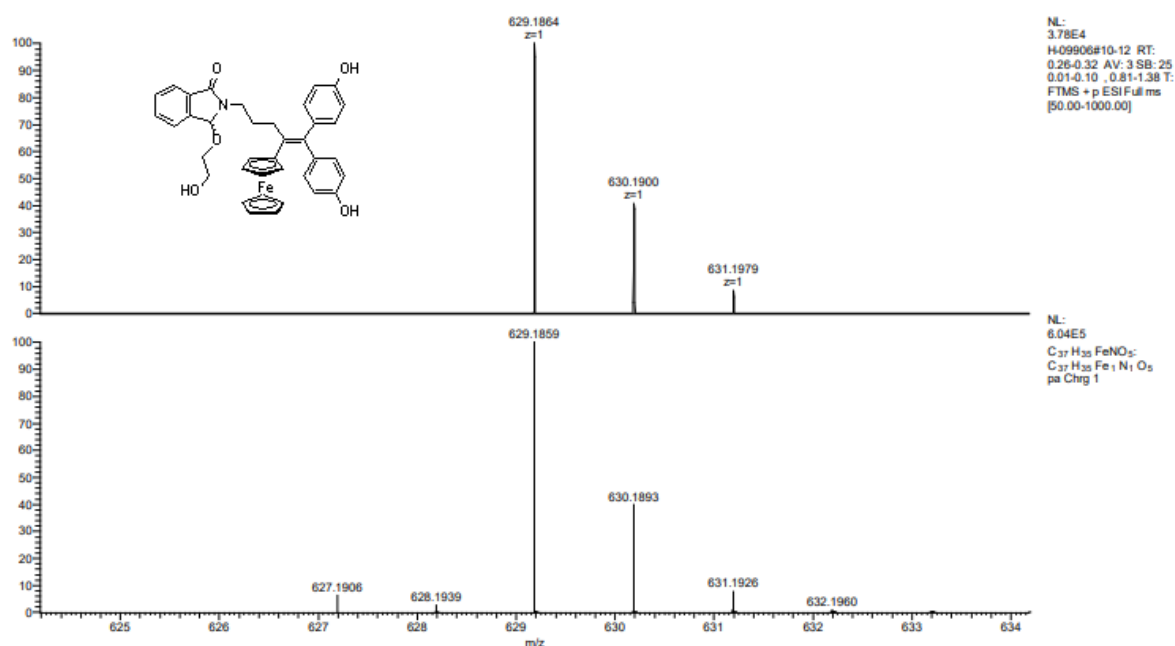

## Experimental/theoretical isotopic pattern MS spectrum

Error = 0.8 ppm; Relative Intensity (%) 100

HRMS (ESI) m/z: [M]<sup>+</sup> Calcd for C<sub>37</sub>H<sub>35</sub>FeNO<sub>5</sub> 629.1859 . Found 629.1864; (Error: 0.8 ppm).

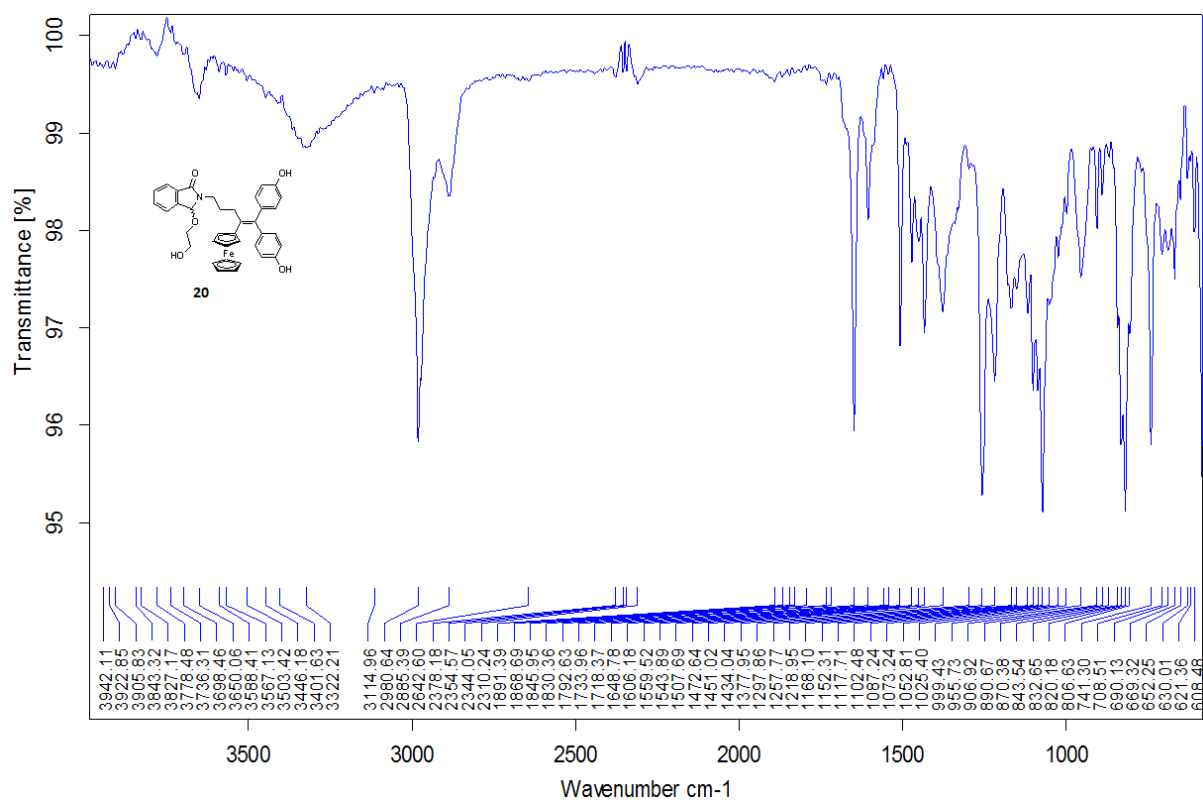



**Figure S43:**  $^1\text{H}$  (in acetone- $d_6$ ),  $^{13}\text{C}$  (in acetone- $d_6$ ) and COSY (in acetone- $d_6$ ) NMR, HR-MS and IR data for compound **21**

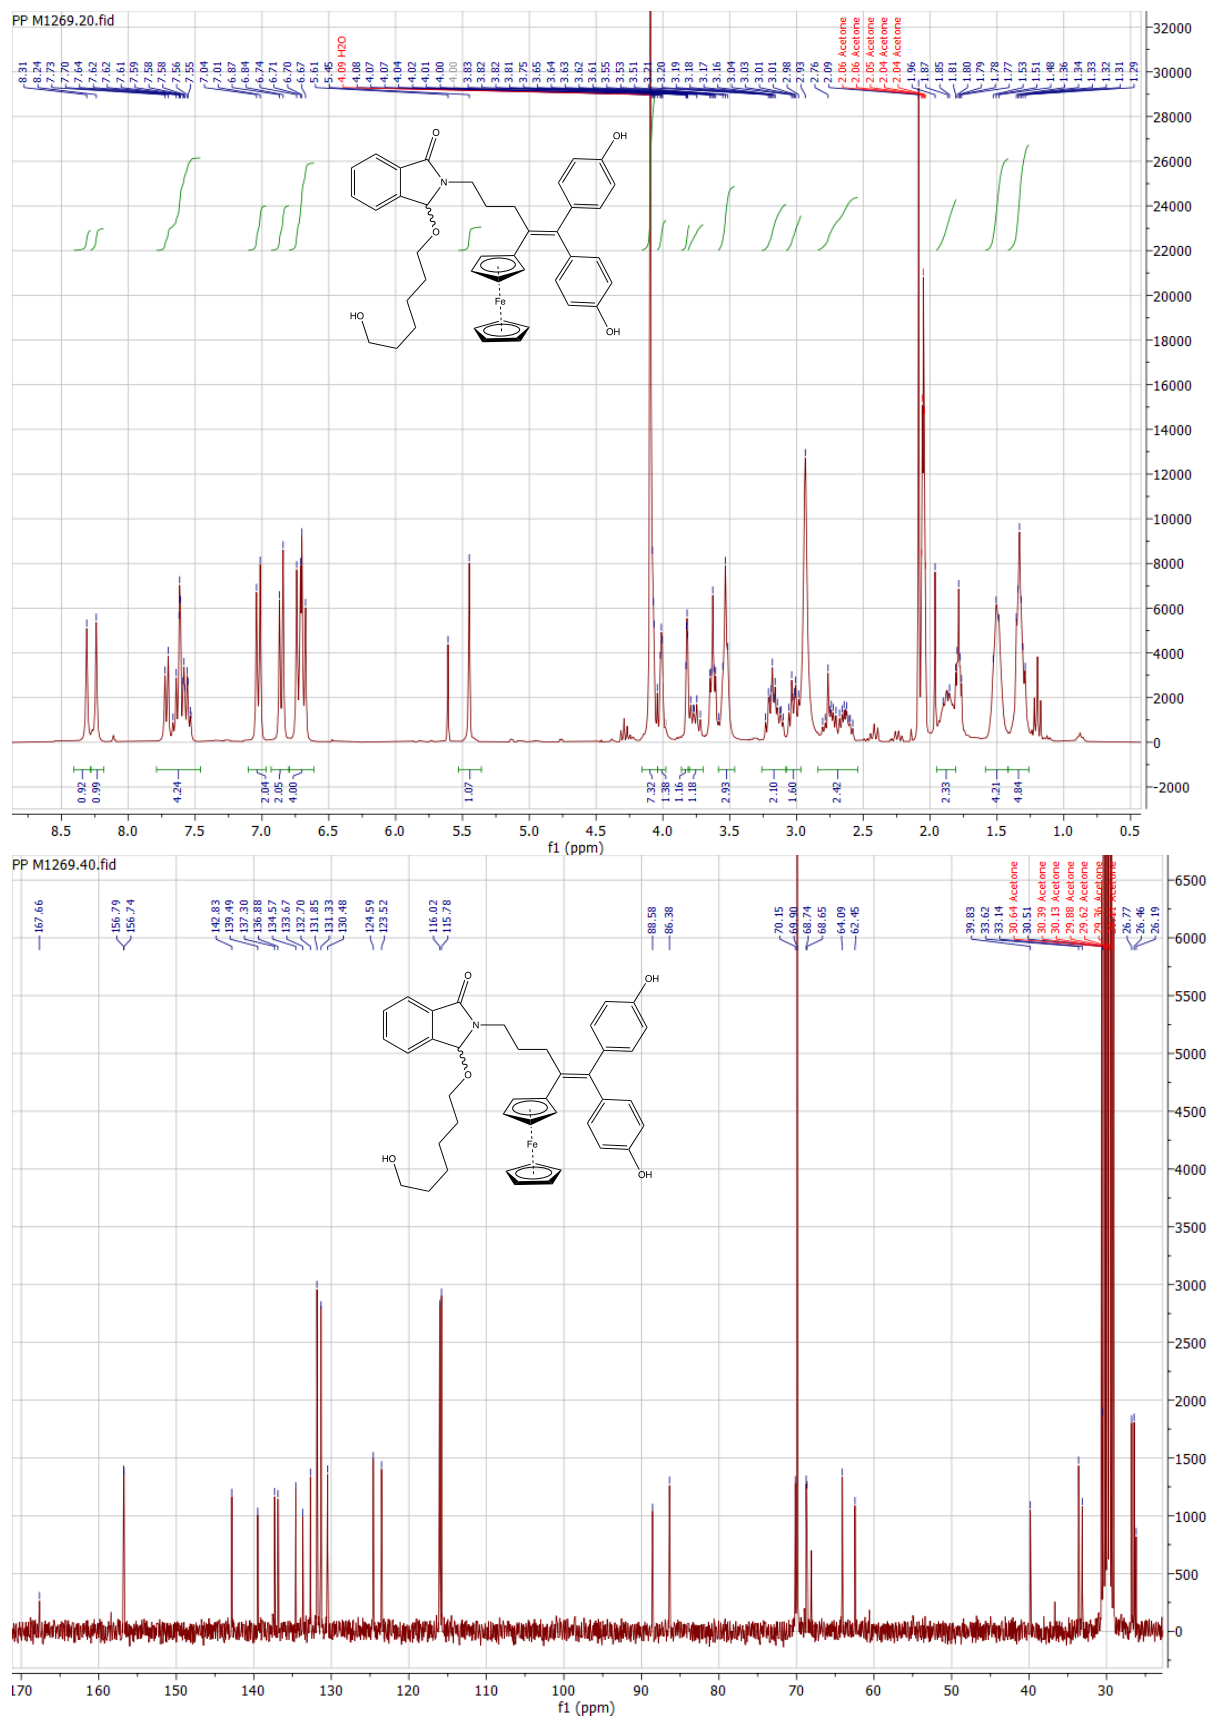

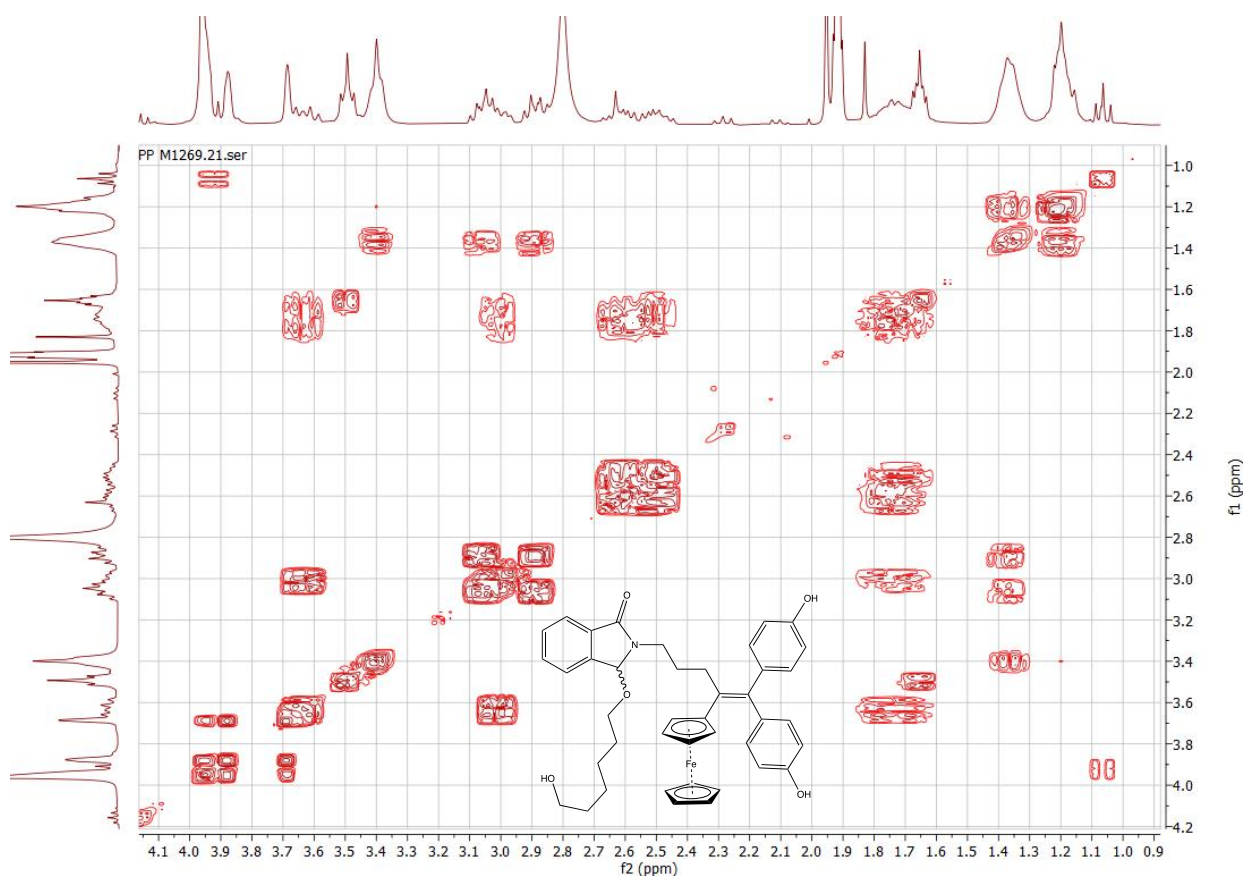

D:\data\hrms\2022 03 22\H-09975  
MeCN

03/21/22 09:08:43

Pascal Pigeon P1006

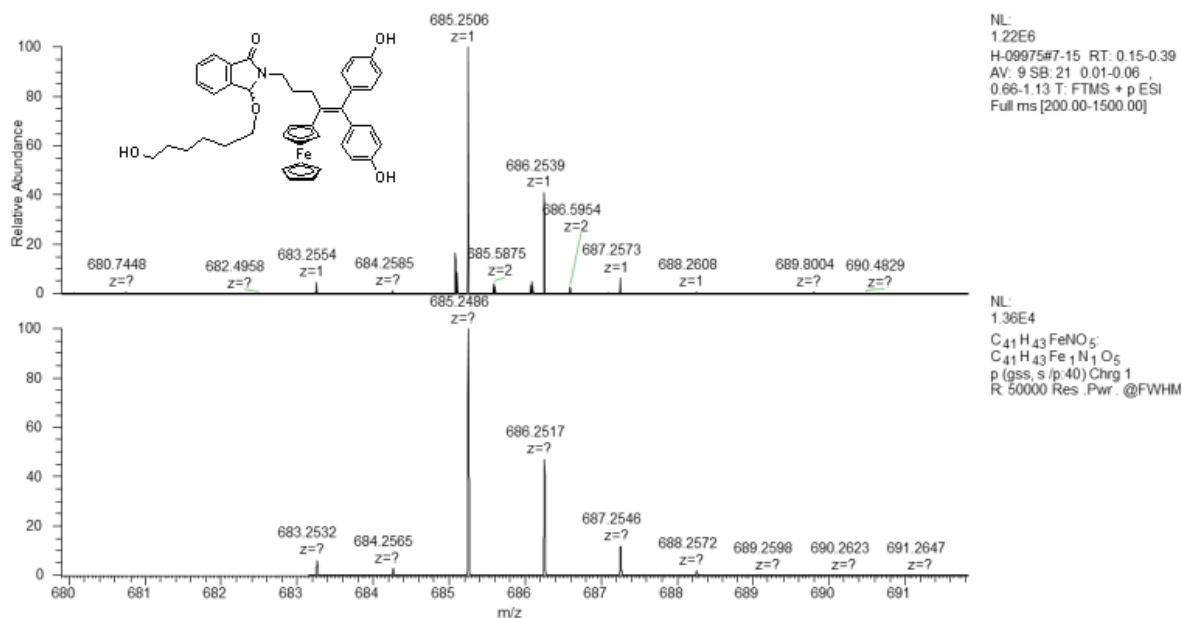

## Experimental/theoretical isotopic pattern MS spectrum

Error = 2.9 ppm; Relative Intensity (%) 100

HRMS (ESI) m/z: [M]<sup>+</sup> Calcd for C<sub>41</sub>H<sub>43</sub>FeNO<sub>5</sub> 685.2486 . Found 685.2506; (Error: 2.9 ppm).

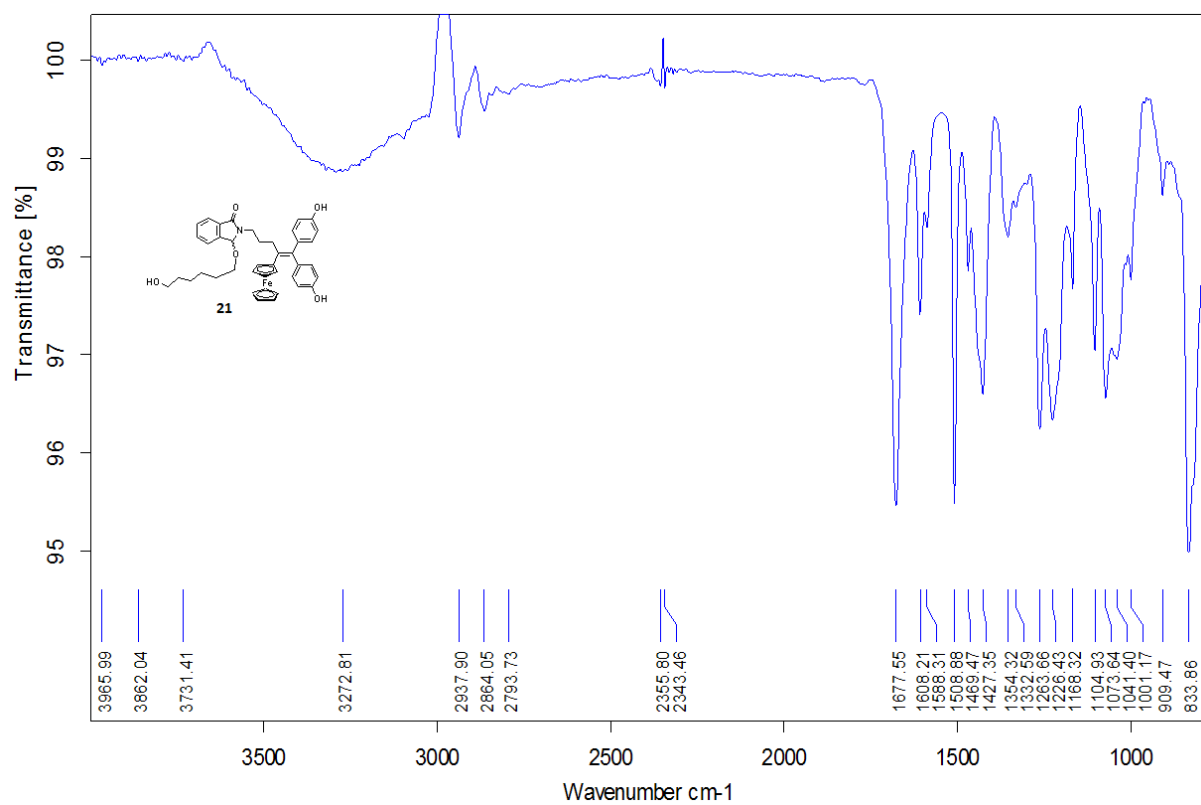

**Figure 44:** COSY (in acetone- $d_6$ ),  $^1\text{H}$  (in acetone- $d_6$ ),  $^{13}\text{C}$  (in acetone- $d_6$ ) NMR, HR-MS and IR data for compound **22**

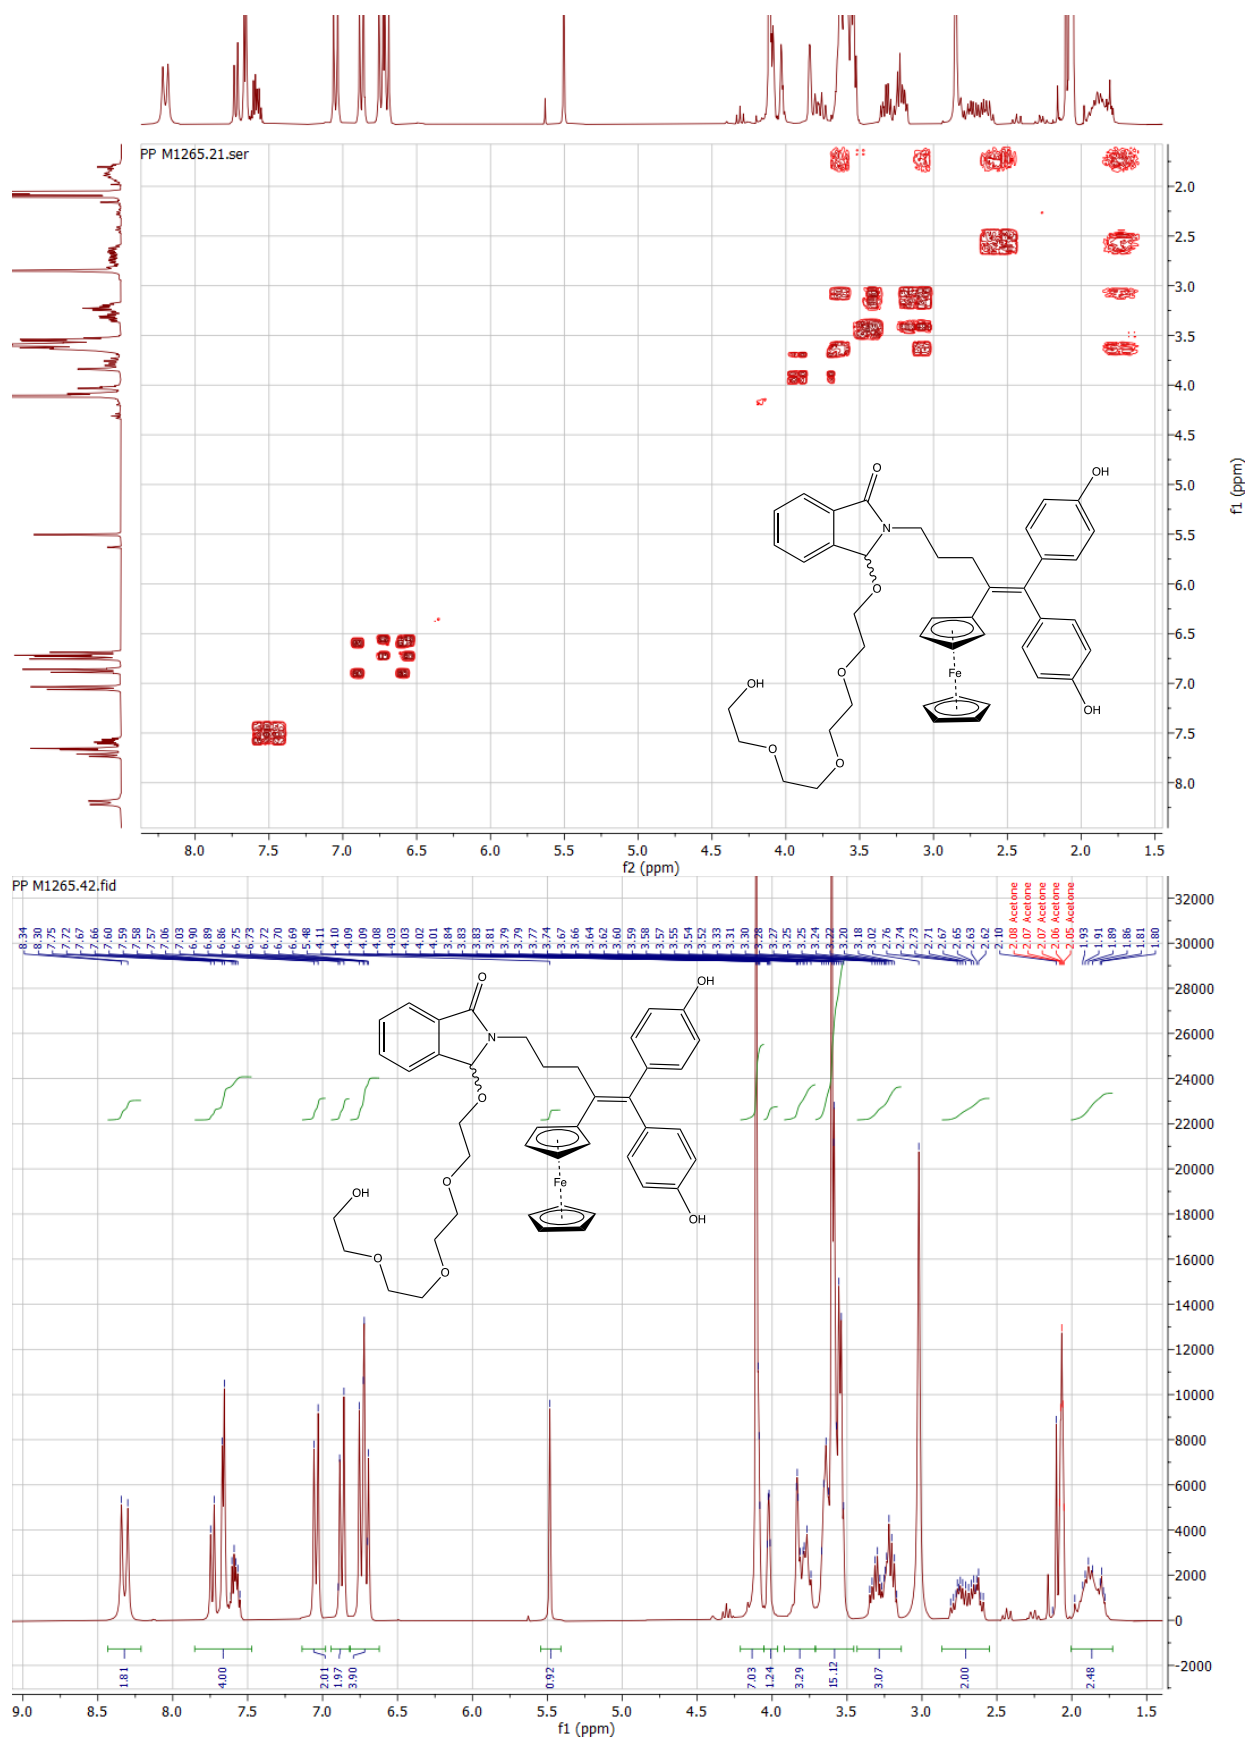

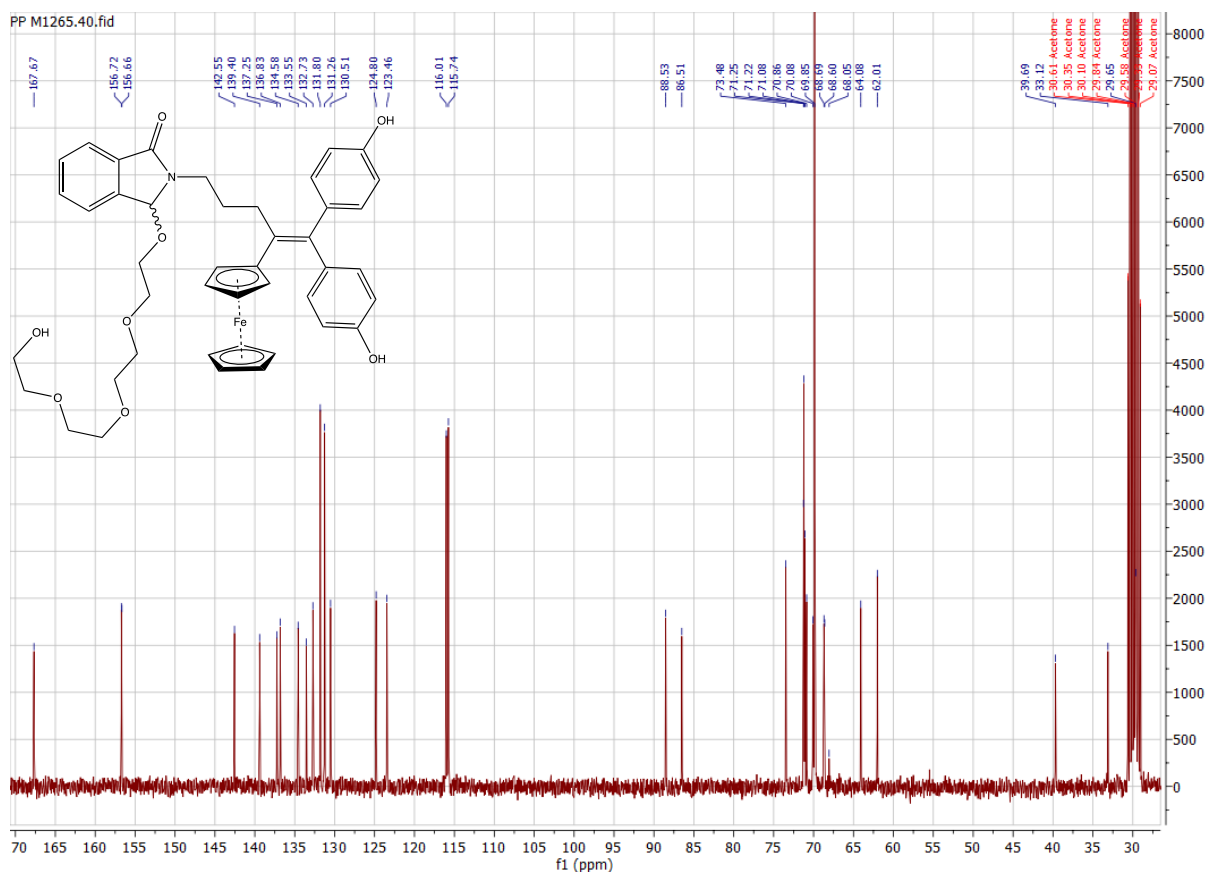

C:\Xcalibur\data\Analysis\H-09902  
MeOH

3/7/2022 4:10:43 PM

Pascal Pigeon P1004

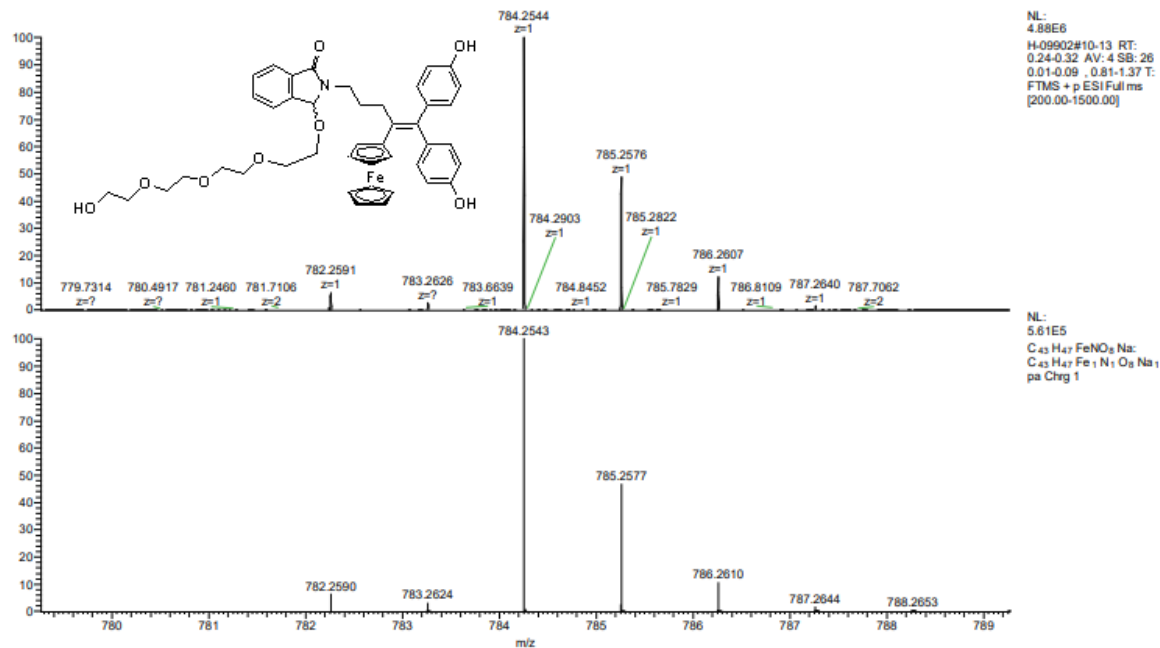

## Experimental/theoretical isotopic pattern MS spectrum

Error = 0.1 ppm; Relative Intensity (%) 100

HRMS (ESI) m/z: [M+Na]<sup>+</sup> Calcd for C<sub>43</sub>H<sub>47</sub>FeNO<sub>8</sub>Na 784.2543. Found 784.2544; (Error: 0.1 ppm).



**Figure S45:**  $^1\text{H}$  (in acetone- $d_6$ ), JMOD (in acetone- $d_6$ ), COSY (in acetone- $d_6$ ) NMR, HR-MS and IR data for compound **23**

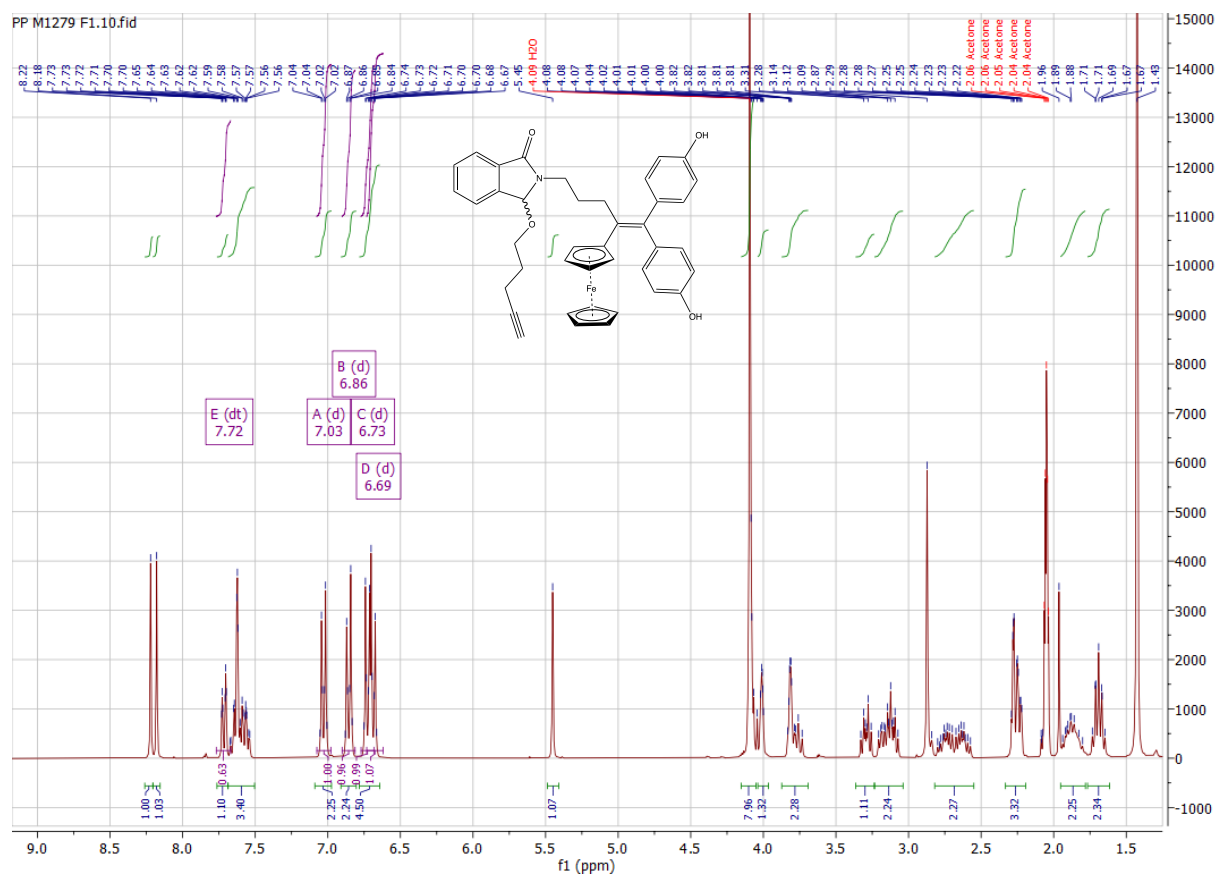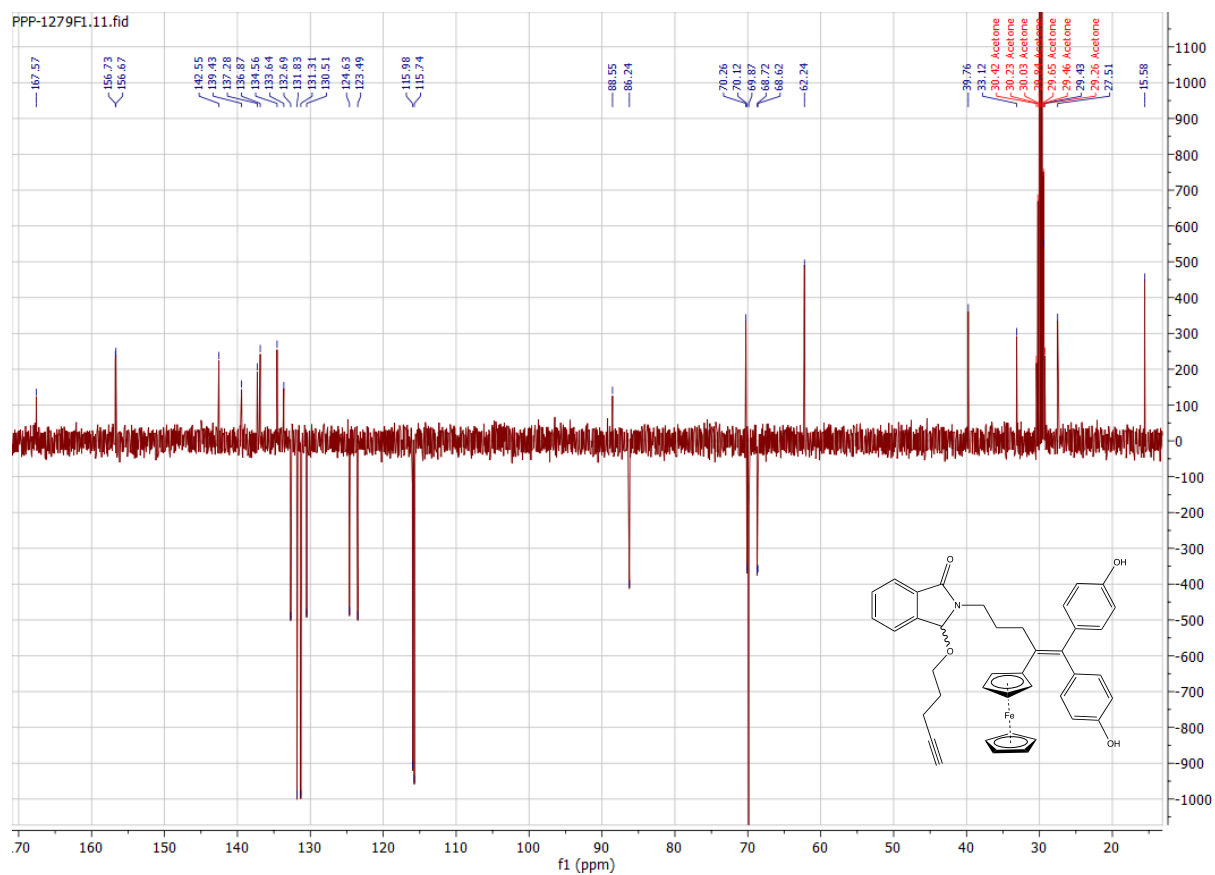

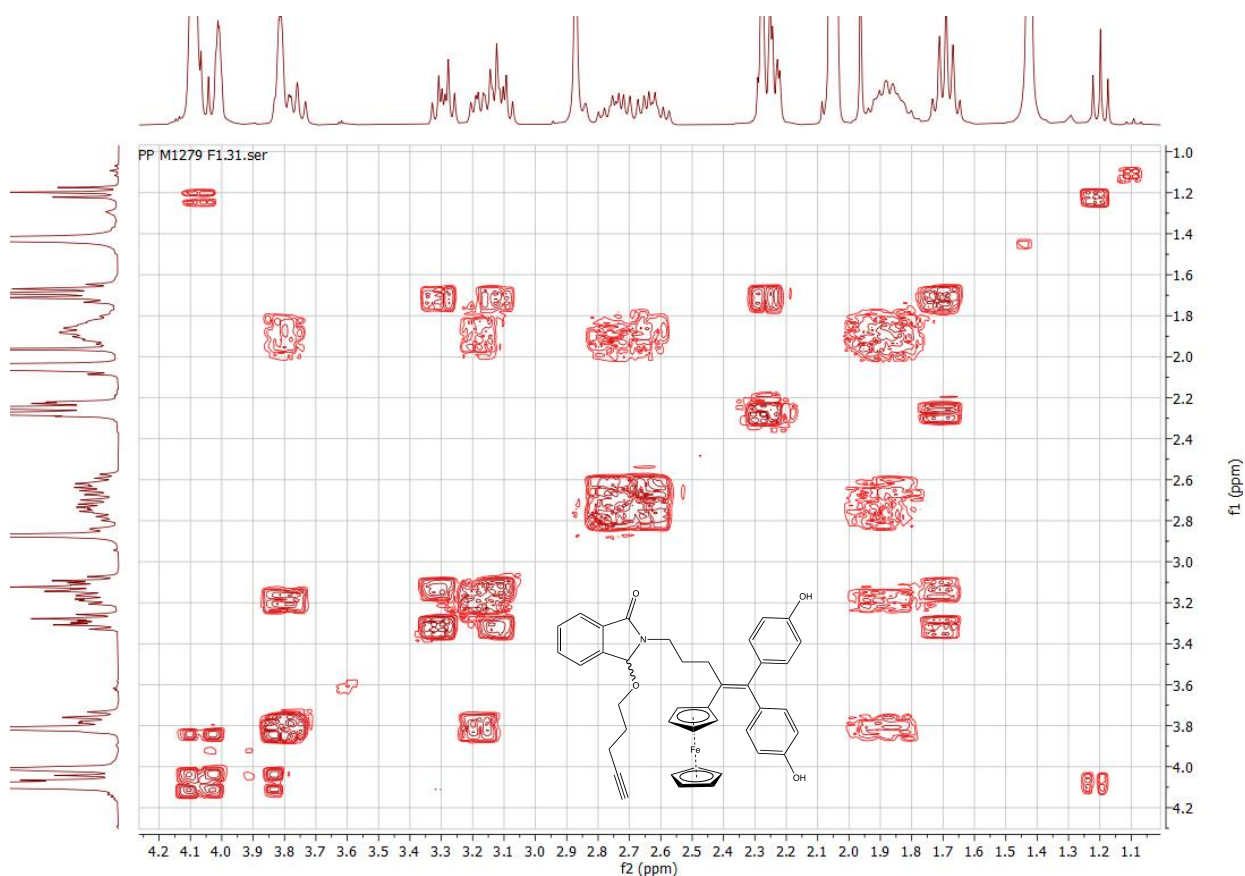

D:\data\hrms\2022 04 08\H-10051apci  
MeCN

04/04/22 16 05 12

Pascal Pigeon P1013

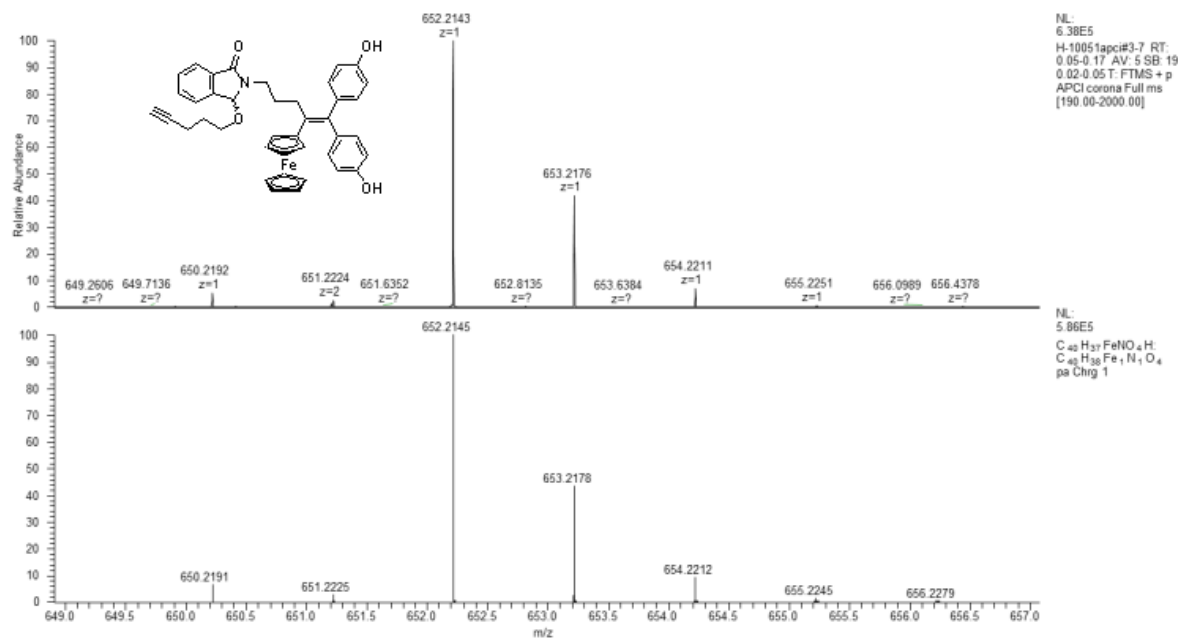

## Experimental/theoretical isotopic pattern MS spectrum

Error = -0.3 ppm; Relative Intensity (%) 100

HRMS (APCI) m/z: [M+H]<sup>+</sup> Calcd for C<sub>40</sub>H<sub>37</sub>FeNO<sub>4</sub>H 652.2145. Found 652.2143; (Error: -0.3 ppm).



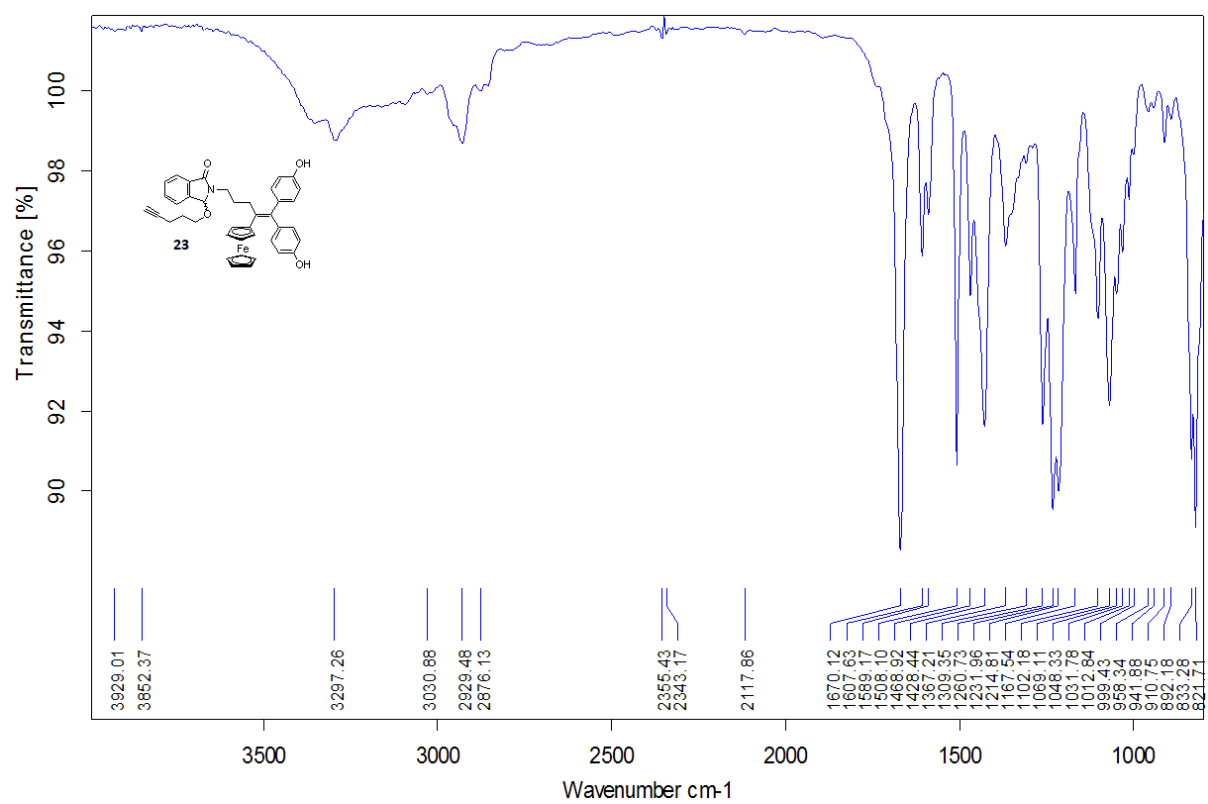

**Figure S46:**  $^1\text{H}$  (in  $\text{CDCl}_3$ ),  $^{13}\text{C}$  (in  $\text{CDCl}_3$ ), COSY (in  $\text{CDCl}_3$ ), HMQC (in  $\text{CDCl}_3$ ) NMR, HR-MS and IR data for compound **24**

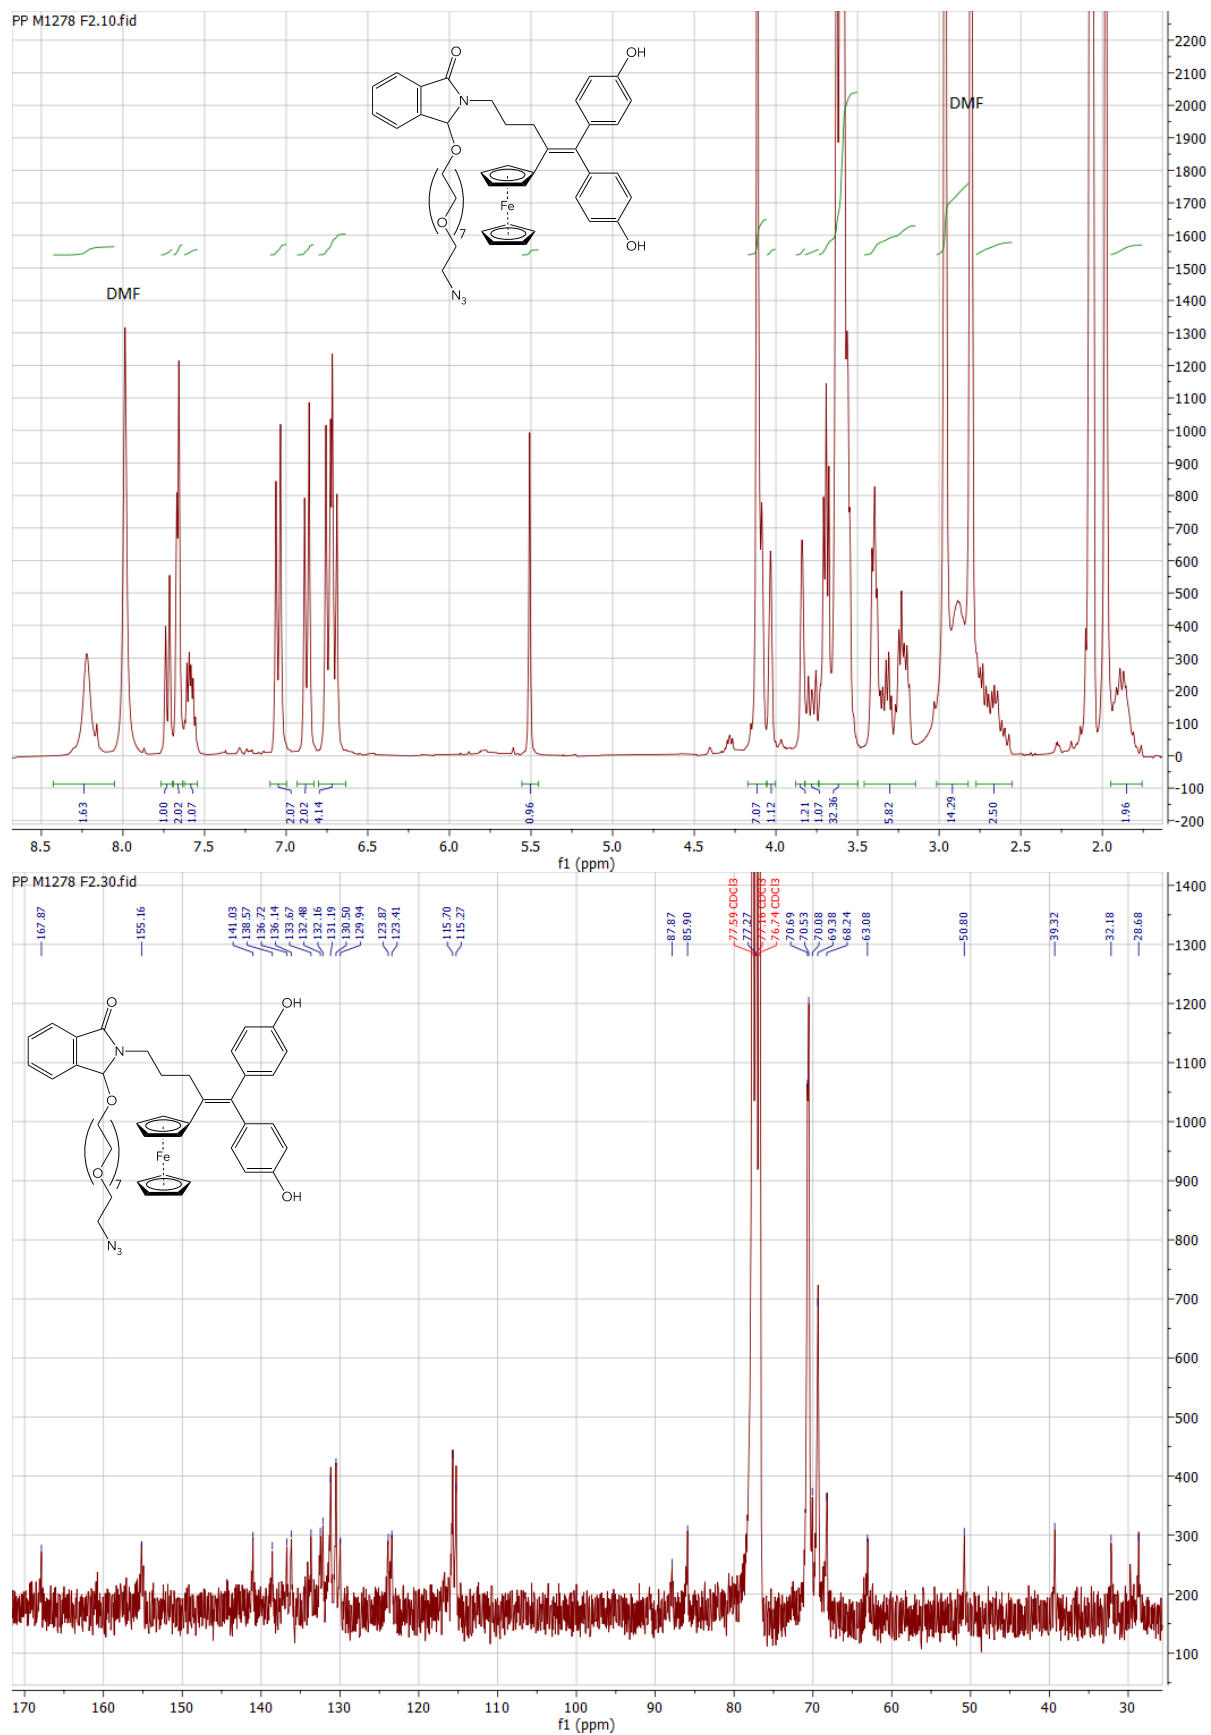

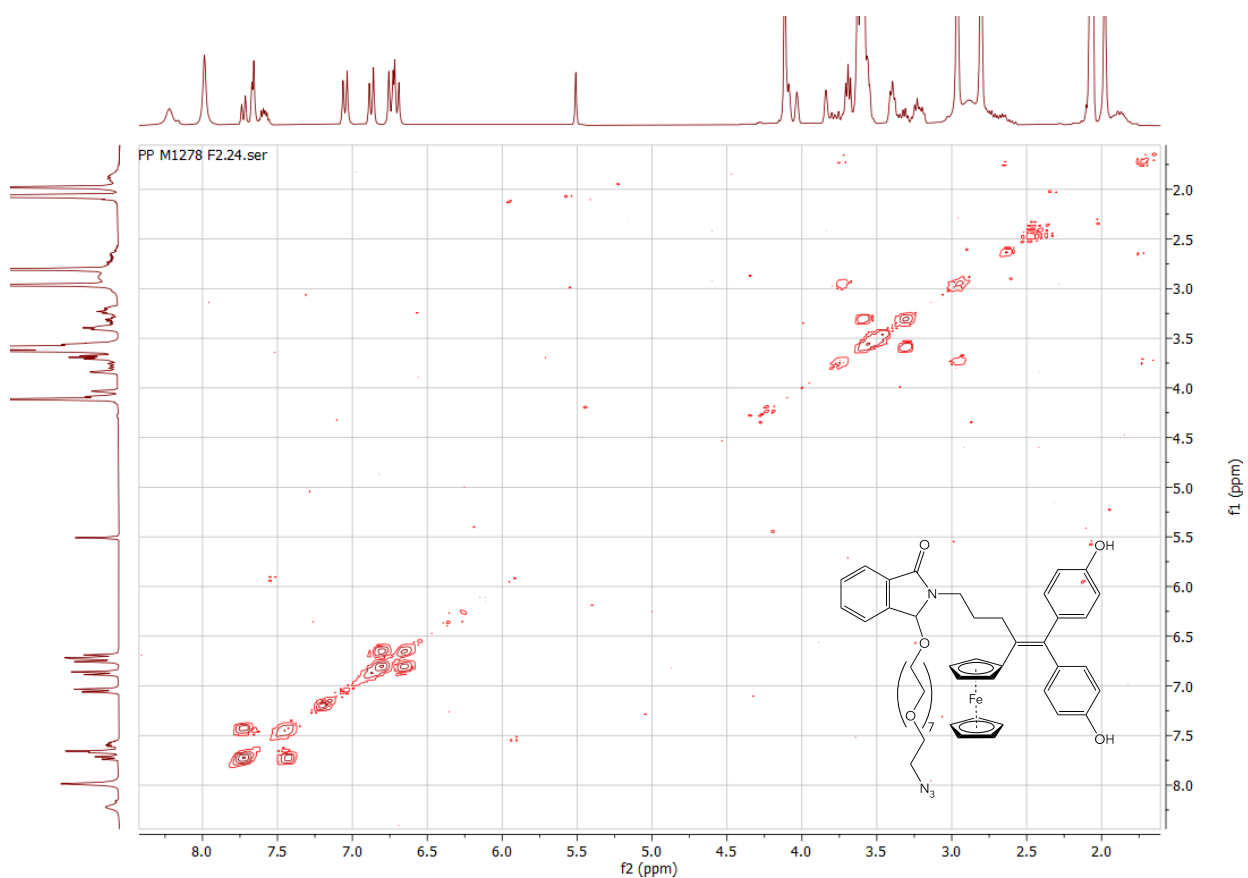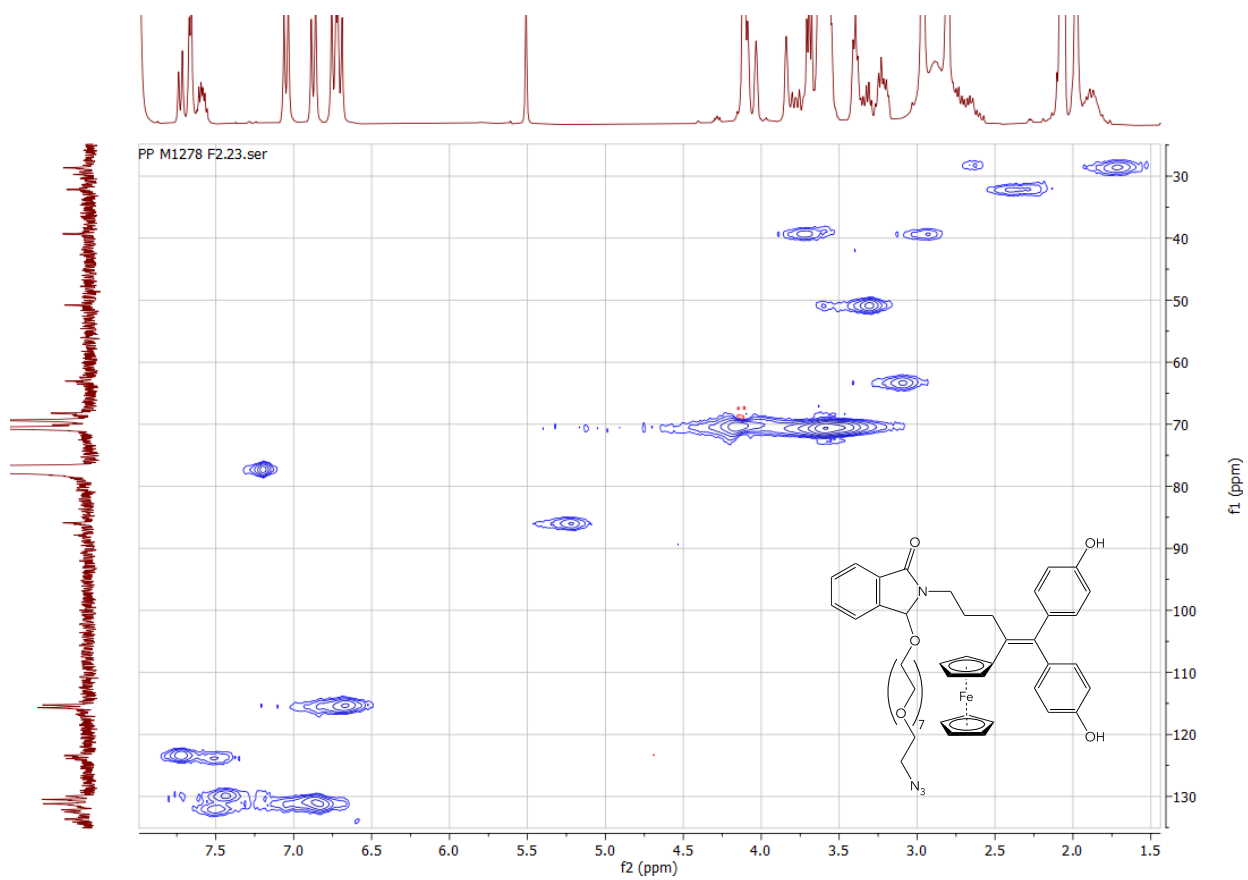

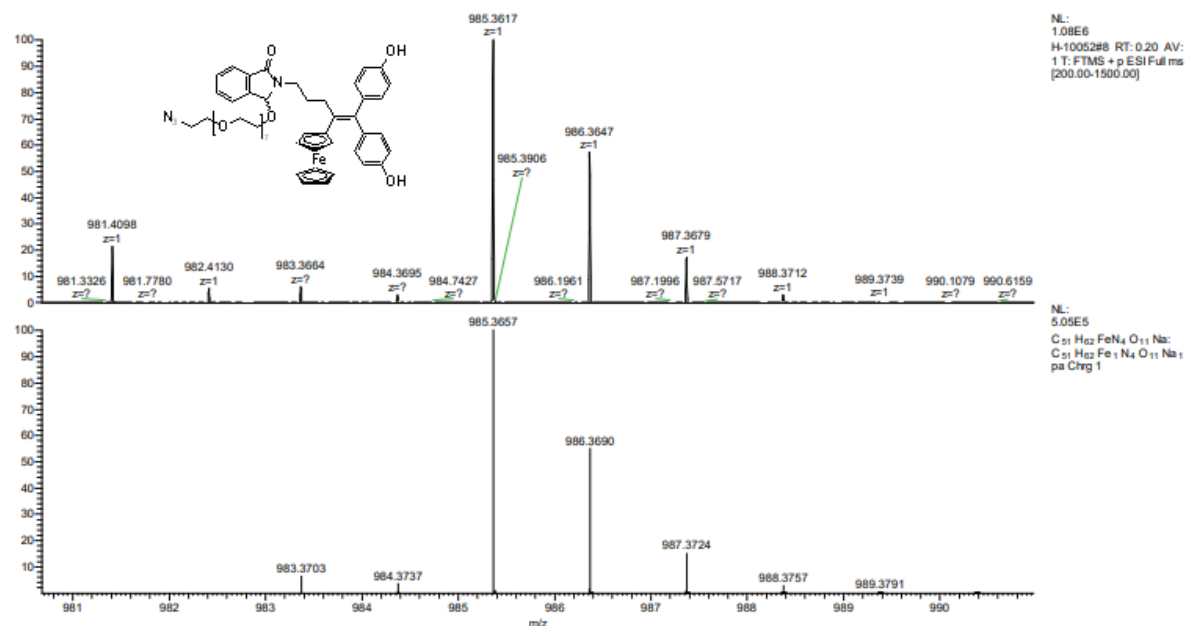

## Experimental/theoretical isotopic pattern MS spectrum

Error = -4.0 ppm; Relative Intensity (%) 100

HRMS m/z: [M+Na]<sup>+</sup> Calcd for C<sub>21</sub>H<sub>22</sub>FeN<sub>4</sub>O<sub>11</sub>Na 983.3703 Found 983.3664 ; (Error: -4.0 ppm).

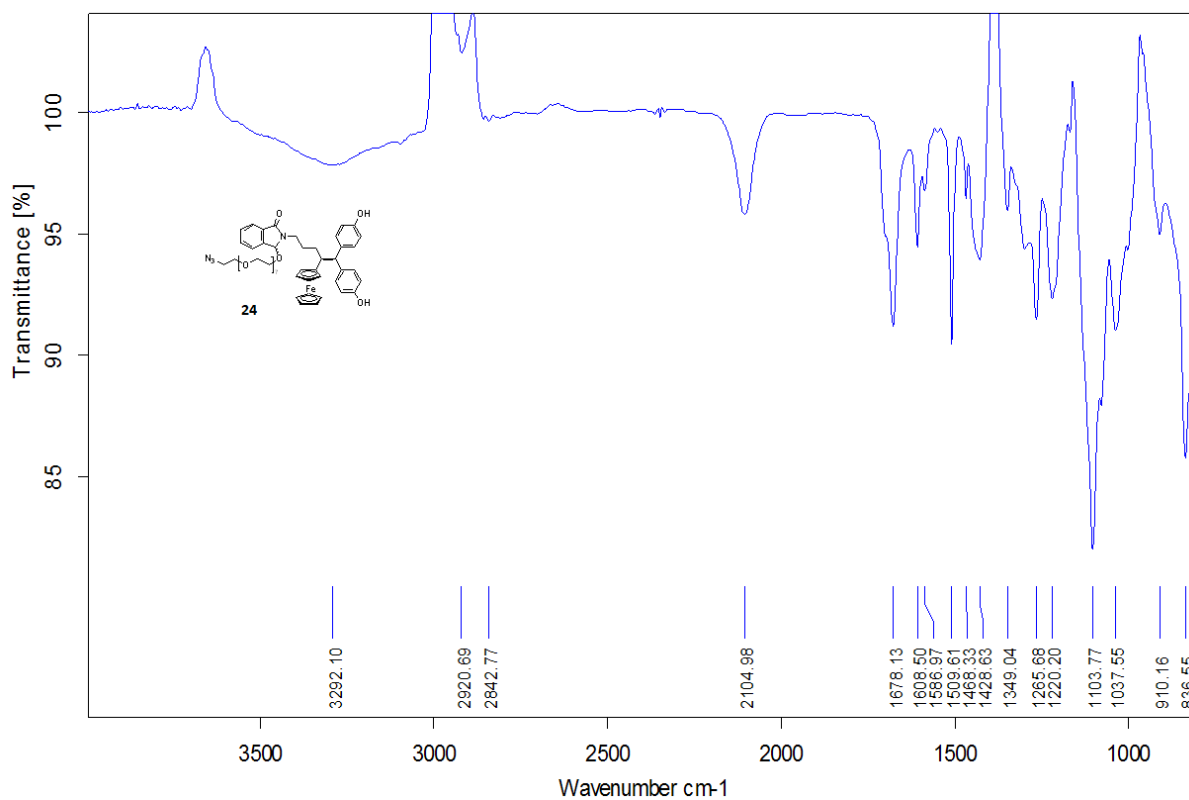

**Figure S47:**  $^1\text{H}$  (in acetone- $\text{d}_6$ ),  $^{13}\text{C}$  (in acetone- $\text{d}_6$ ), COSY (in acetone- $\text{d}_6$ ) NMR, HR-MS and IR data for compound **25**

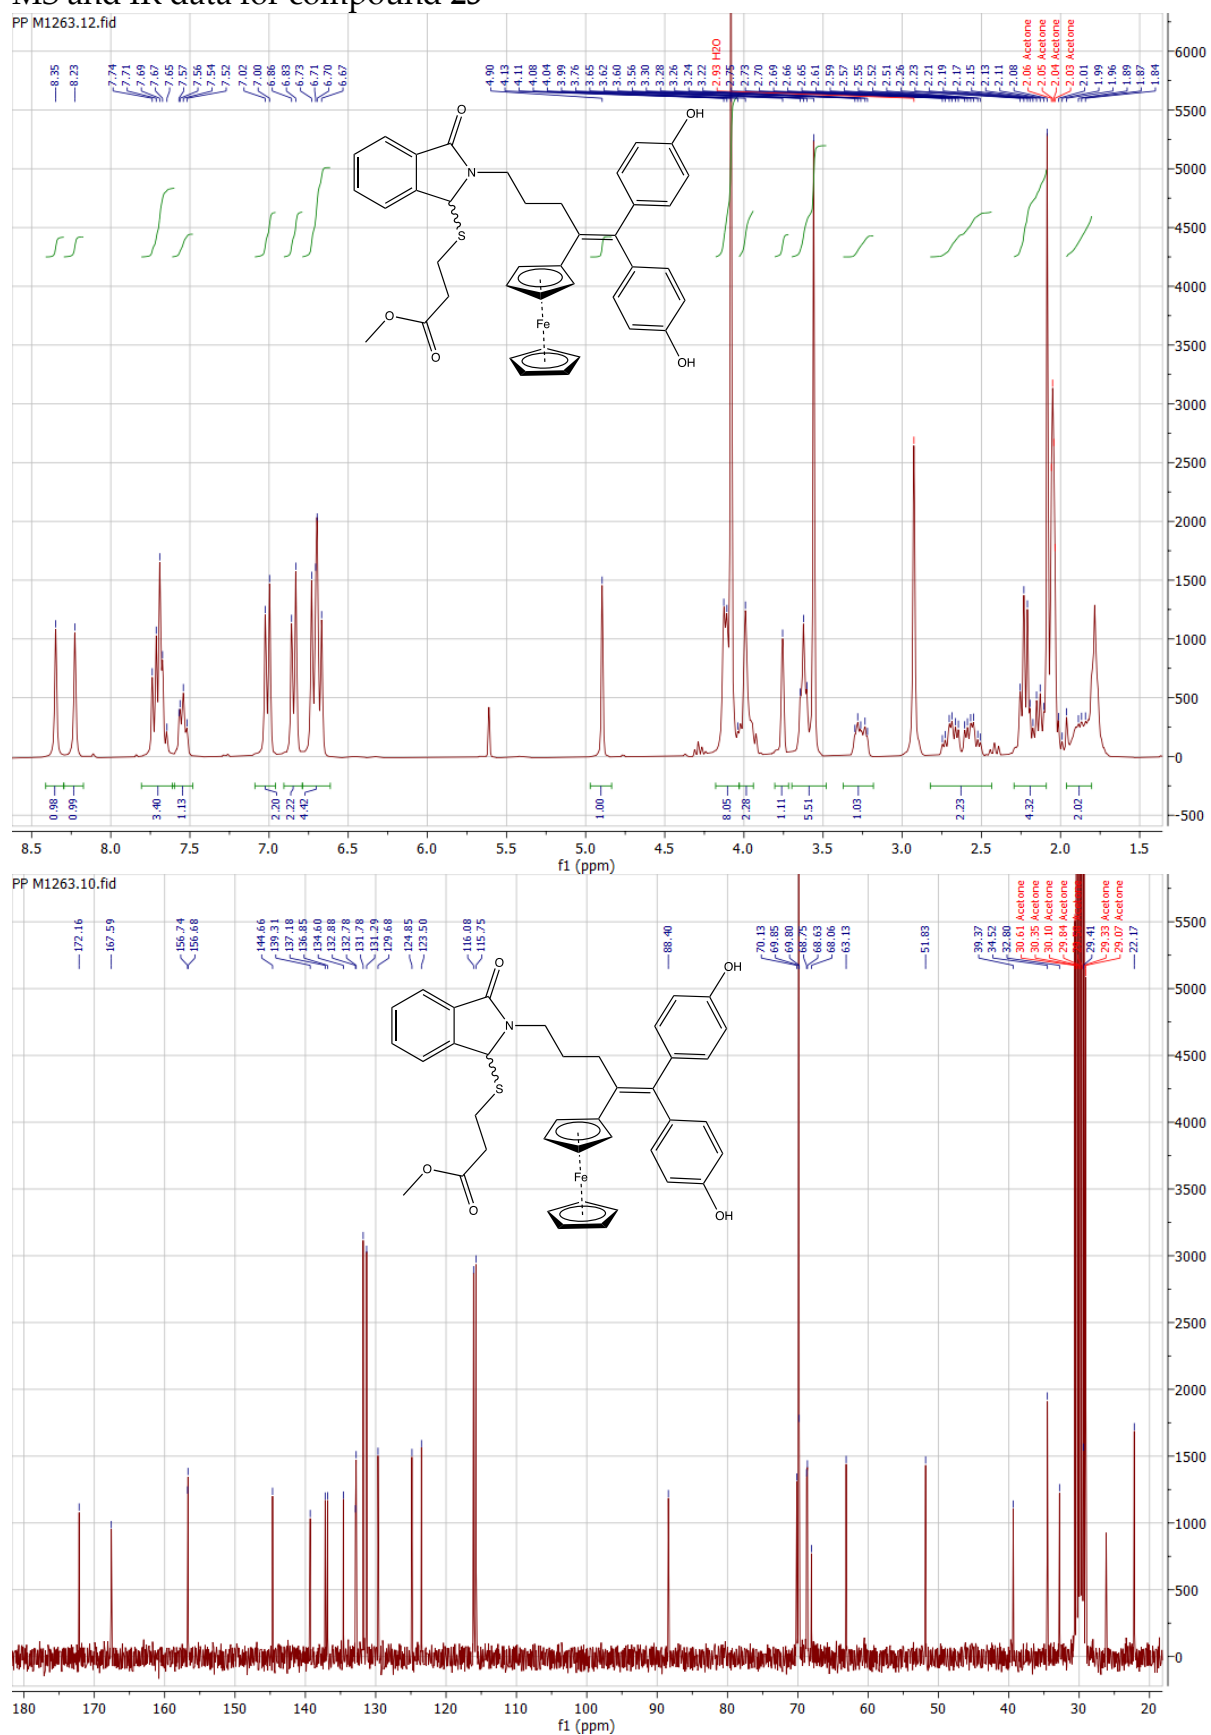

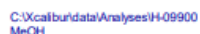

3/7/2022 4:01:48 PM

Pascal Pigeon P1000

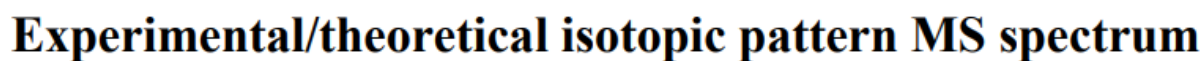

HRMS (ESI) m/z: [M]<sup>+</sup> Calcd for C<sub>39</sub>H<sub>37</sub>FeNO<sub>5</sub>S 687.1736 . Found 687.1736; (Error: 0.0 ppm).

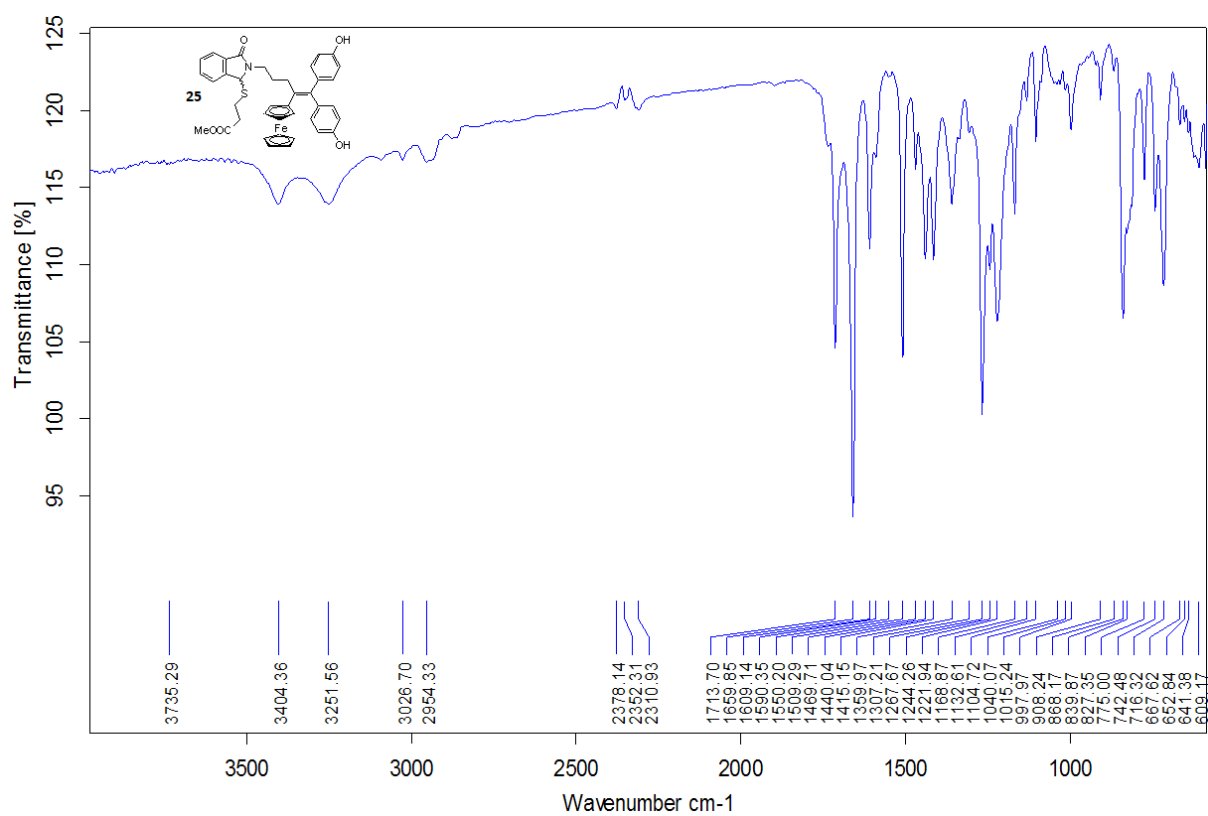

**Figure S48:** COSY (in DMSO- $d_6$ ),  $^1\text{H}$  (in DMSO- $d_6$ ),  $^{13}\text{C}$  (in DMSO- $d_6$ ) NMR, HR-MS and IR data for compound **26**

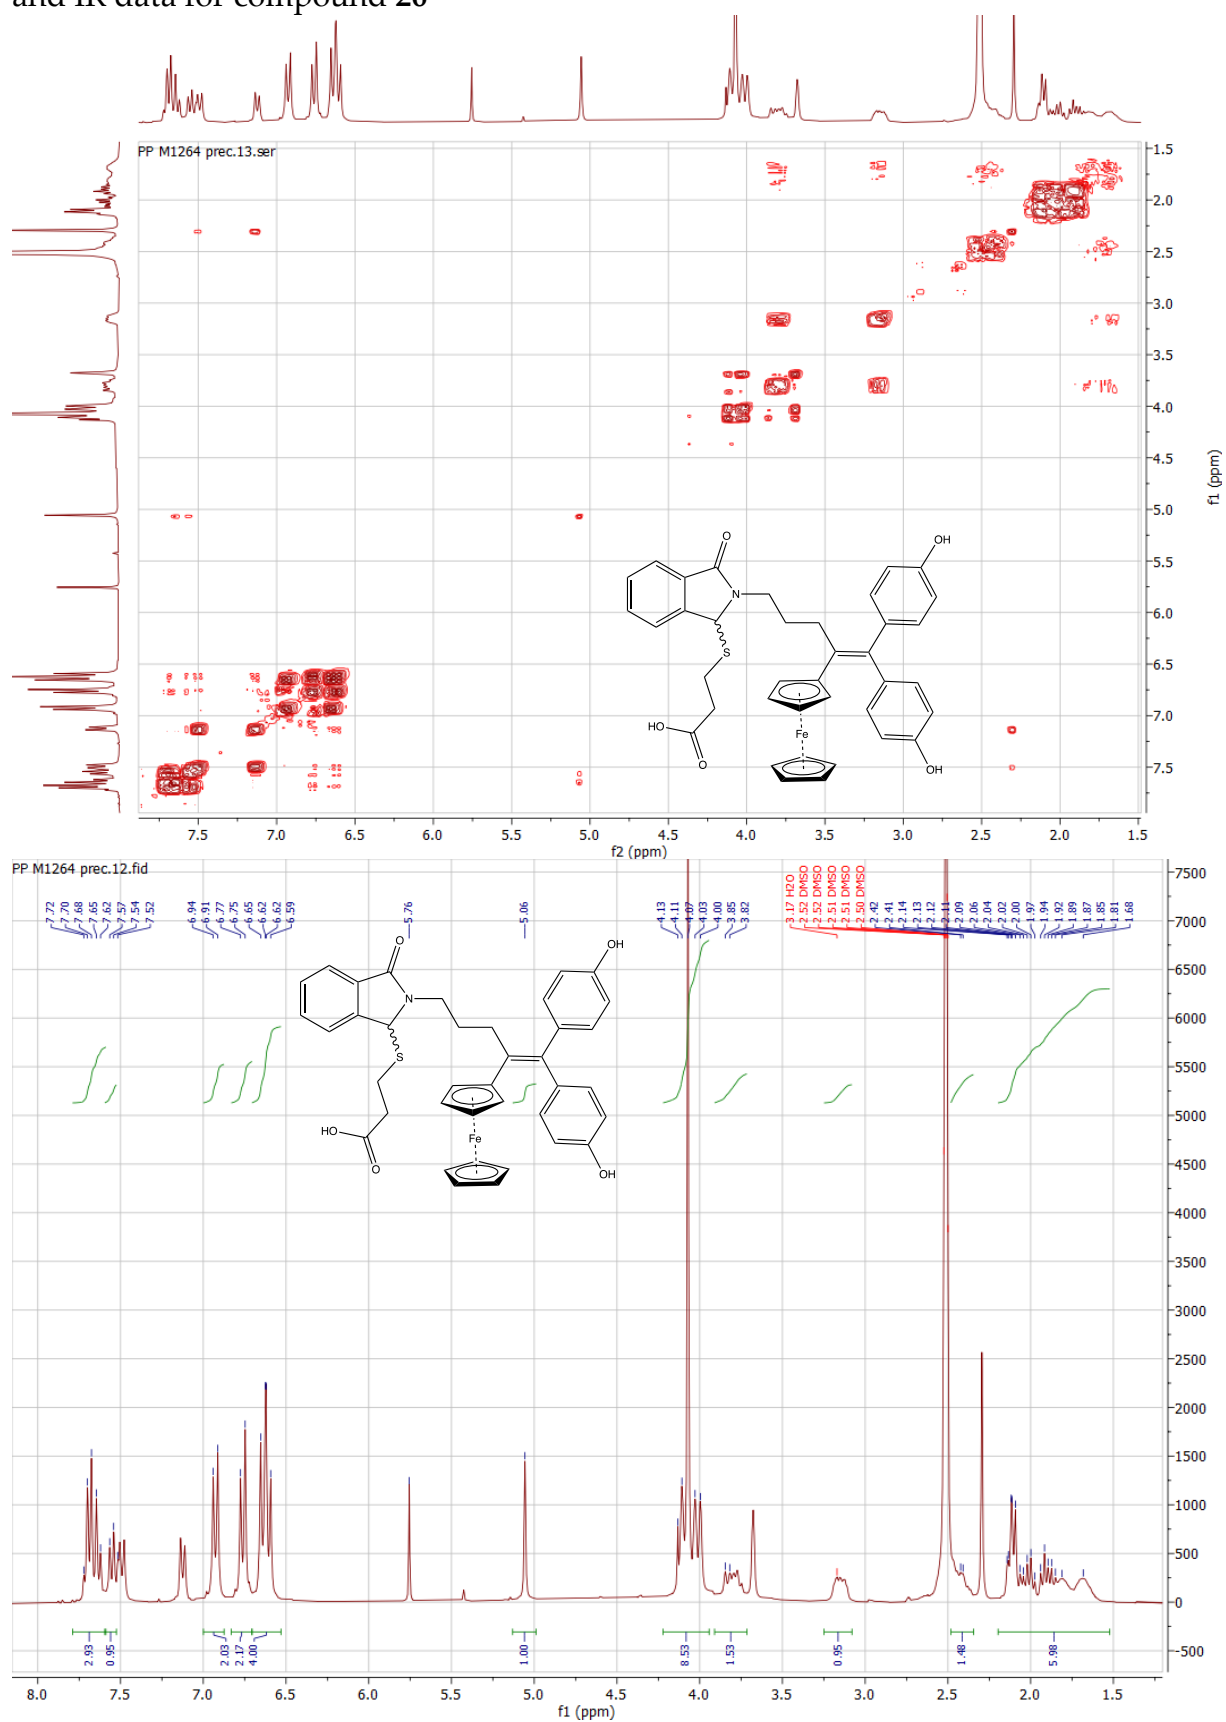



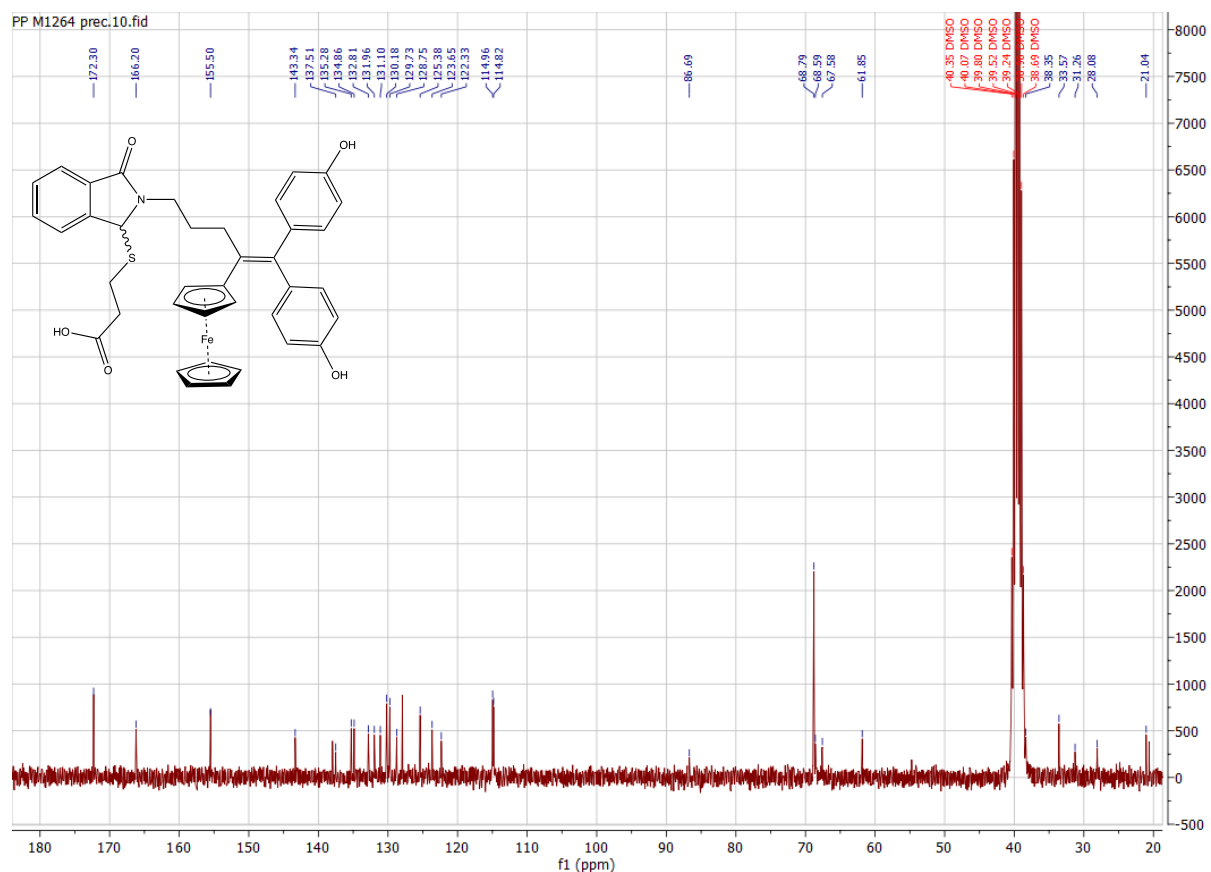

C:\xcalibur\data\Analyses\H-09977\neg  
MeOH

3/21/2022 2:33:03 PM

Pascal Pigeon P1001

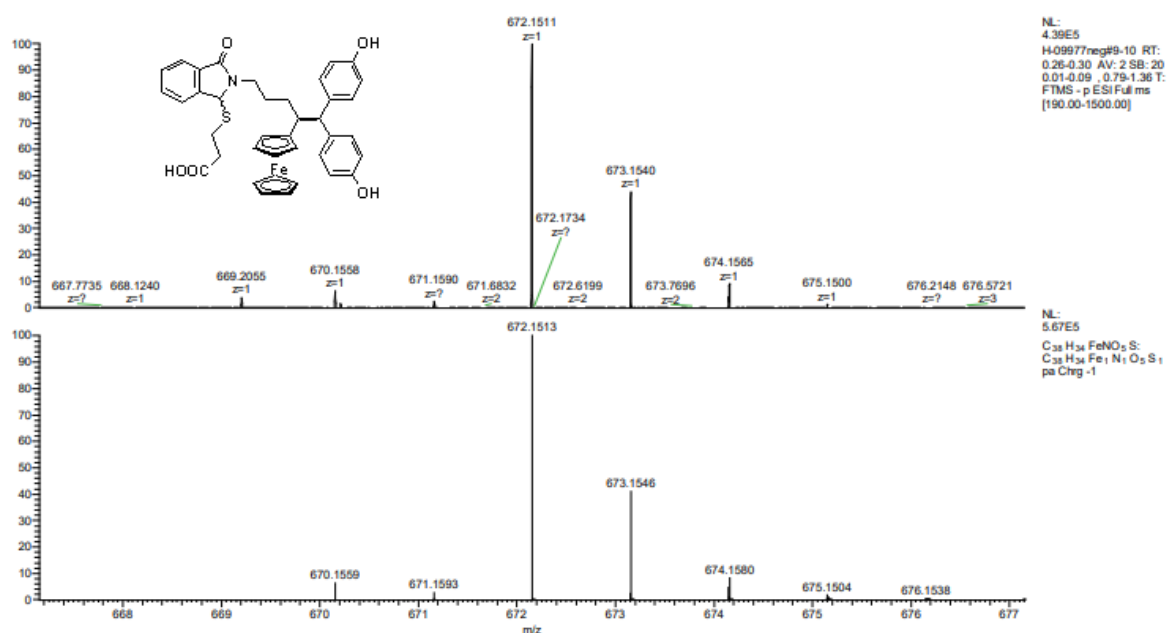

## Experimental/theoretical isotopic pattern MS spectrum

Error = -0.2 ppm; Relative Intensity (%) 100

HRMS (ESI) m/z: [M] 1- Calcd for C<sub>38</sub>H<sub>34</sub>FeNO<sub>5</sub>S 672.1513 . Found 672.1511; (Error: -0.2 ppm).

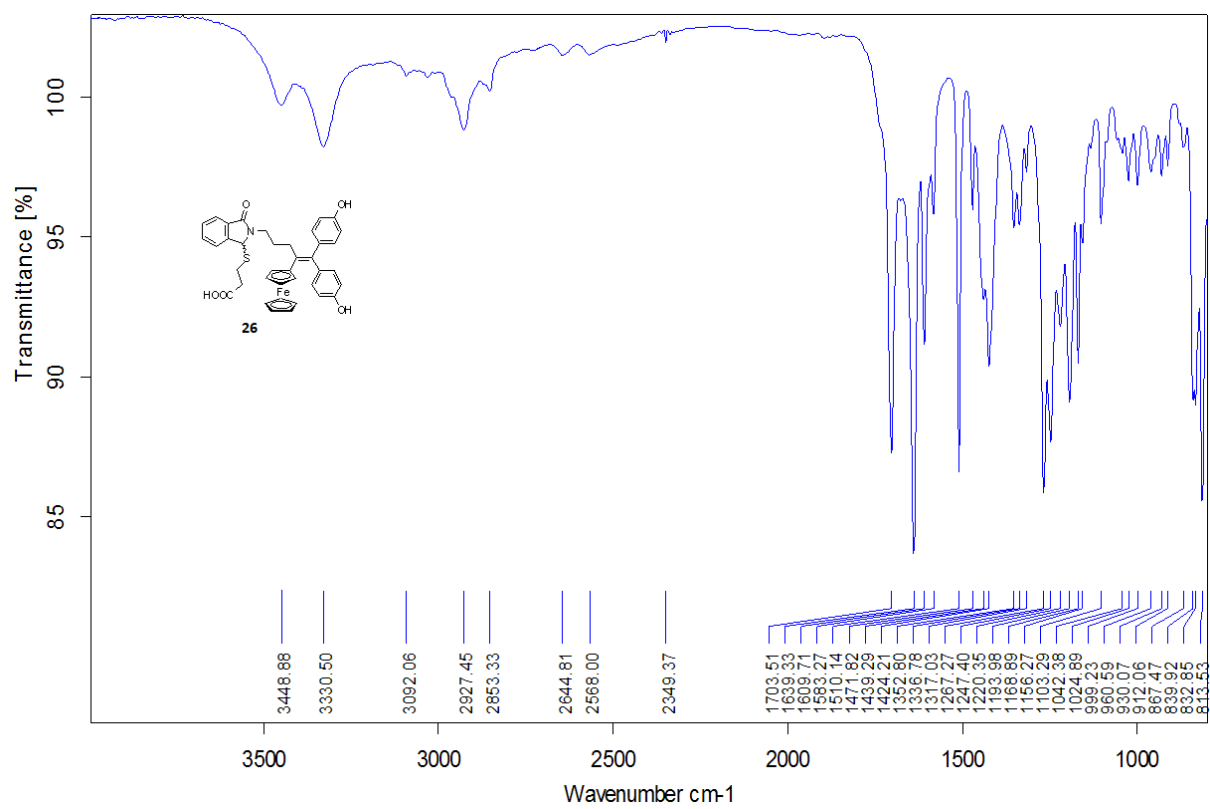

**Figure S49:**  $^1\text{H}$  (in acetone- $d_6$ ),  $^{13}\text{C}$  (in acetone- $d_6$ ), COSY (in acetone- $d_6$ ), HMQC (in acetone- $d_6$ ) NMR, HR-MS and IR data for compound **27**

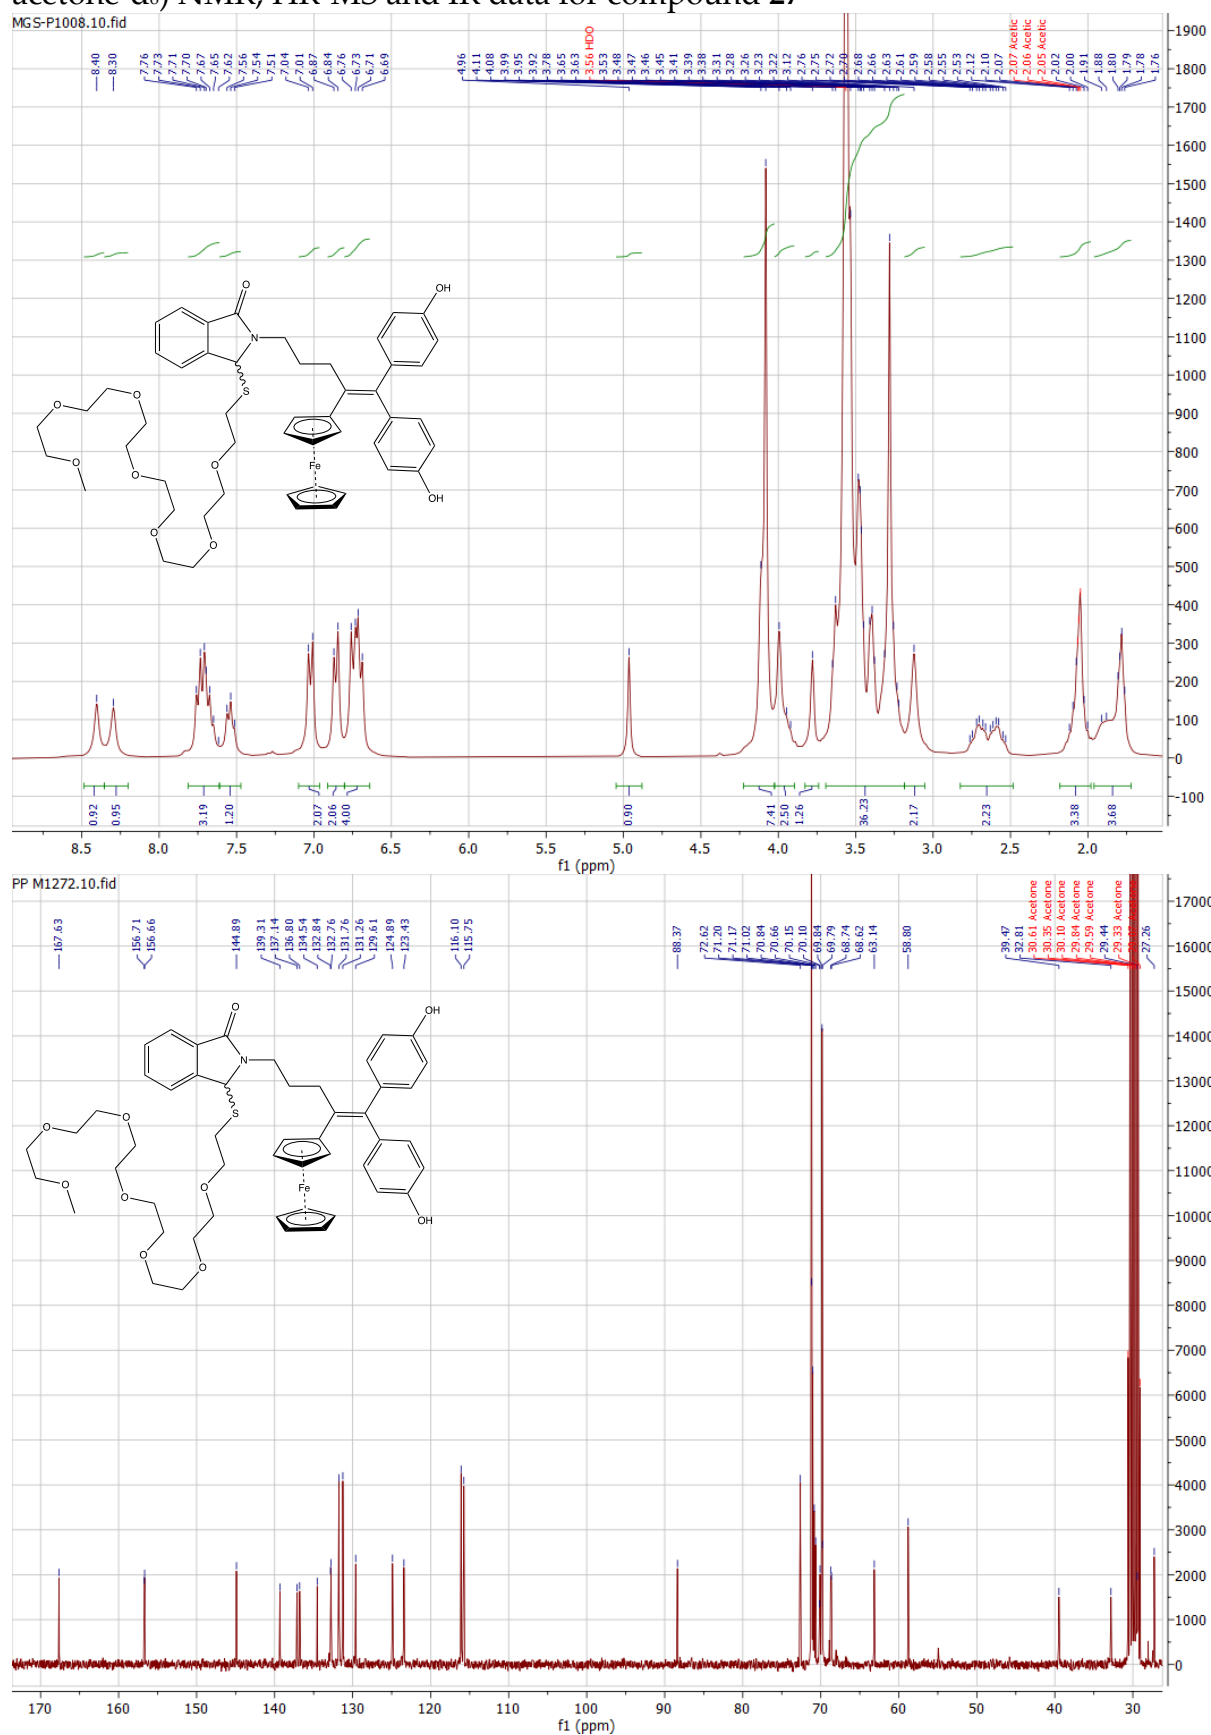

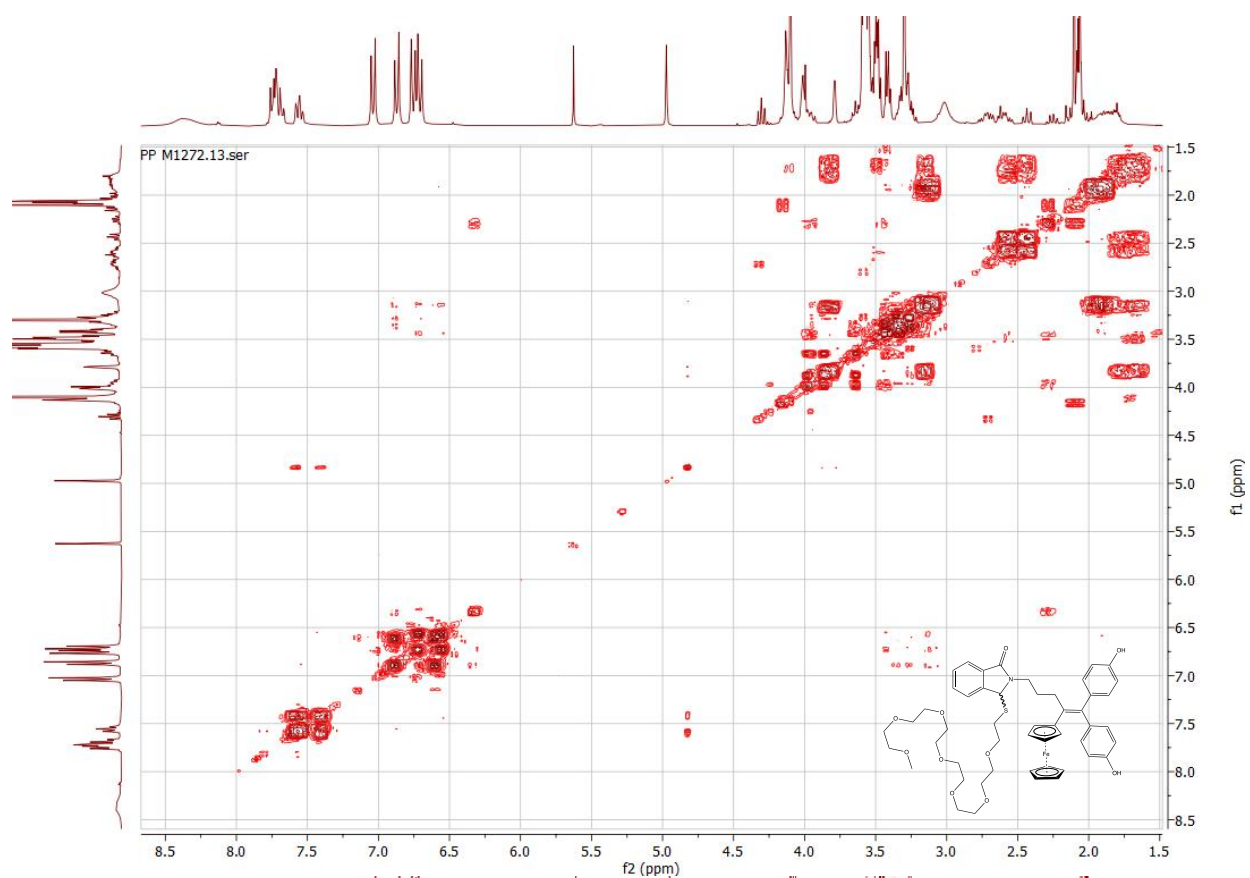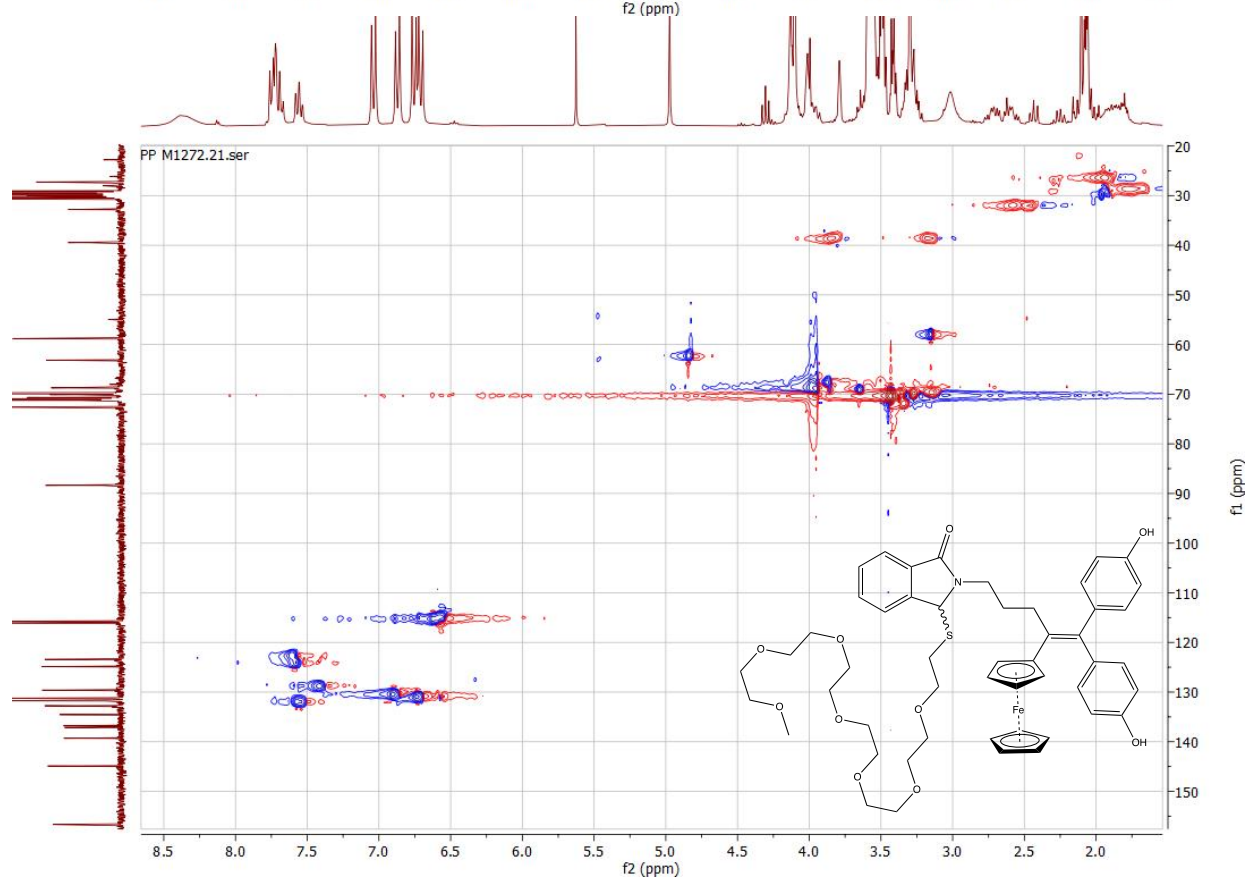

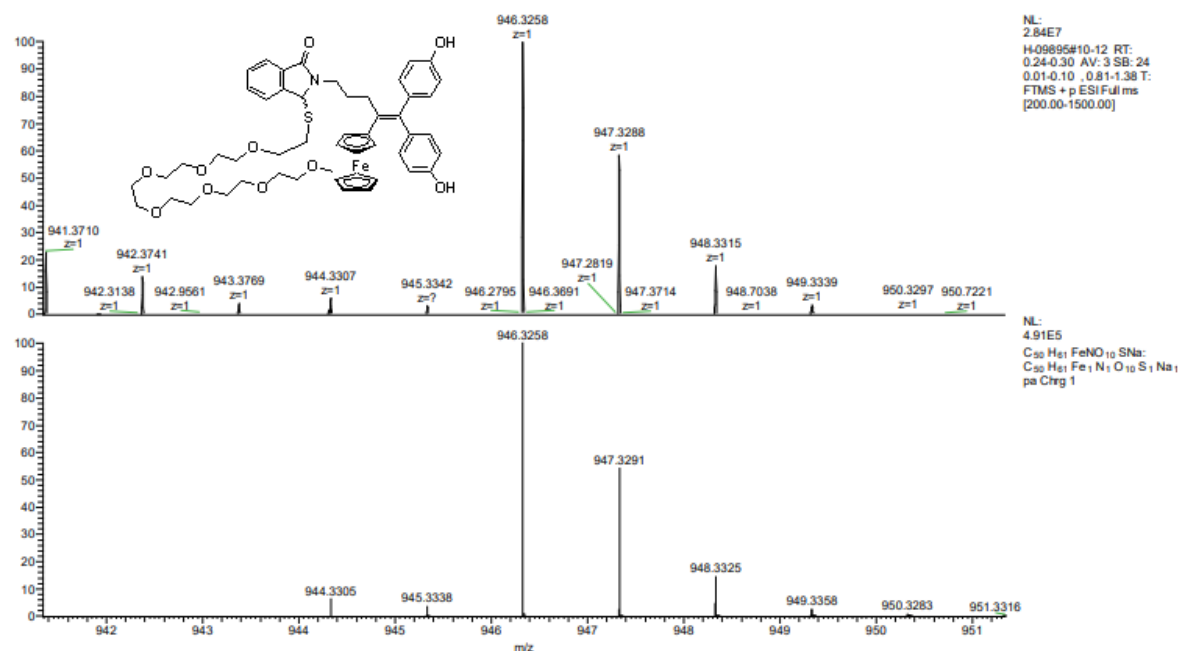

## Experimental/theoretical isotopic pattern MS spectrum

Error = 0.0 ppm; Relative Intensity (%) 100

HRMS (ESI)  $m/z$ :  $[M+Na]^+$  Calcd for  $C_{50}H_{61}FeNO_{10}SNa$  946.3258. Found 946.3258; (Error: 0.0 ppm).

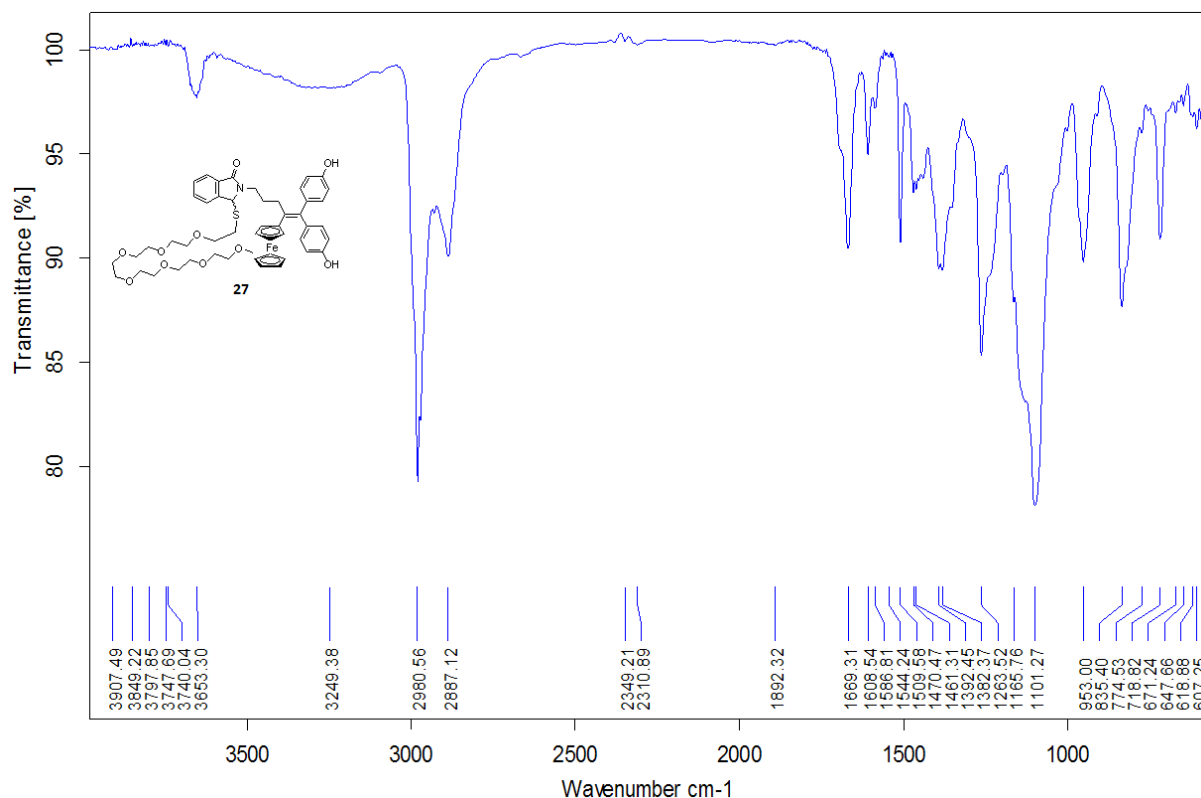

**Table S1.** Crystallographic data and structure refinement parameters for **15**, **23•acetone** and **25•acetone**.

| Parameters                                          | 15                                         | 23•0.5acetone                                         | 25•acetone                                          |
|-----------------------------------------------------|--------------------------------------------|-------------------------------------------------------|-----------------------------------------------------|
| Chemical formula                                    | C <sub>16</sub> H <sub>17</sub> FeNO       | C <sub>41.5</sub> H <sub>40</sub> FeNO <sub>4.5</sub> | C <sub>42</sub> H <sub>43</sub> FeNO <sub>6</sub> S |
| Formula weight (g.mol <sup>-1</sup> )               | 295.15                                     | 680.59                                                | 745.68                                              |
| Crystal system                                      | monoclinic                                 | monoclinic                                            | triclinic                                           |
| Space group                                         | P2 <sub>1</sub> /c                         | P2 <sub>1</sub> /n                                    | P-1                                                 |
| Crystal size (mm <sup>3</sup> )                     | 0.37 × 0.27 × 0.06                         | 0.2 × 0.1 × 0.05                                      | 0.3 × 0.2 × 0.1                                     |
| Crystal color and shape                             | Yellow prism                               | Orange prism                                          | Orange plate                                        |
| a (Å)                                               | 14.6466(7)                                 | 9.8118(3)                                             | 10.7220(5)                                          |
| b (Å)                                               | 7.1923(3)                                  | 17.2893(6)                                            | 13.2436(6)                                          |
| c (Å)                                               | 12.0545(6)                                 | 20.2760(6)                                            | 15.3329(6)                                          |
| α (°)                                               | 90                                         | 90                                                    | 97.196(3)                                           |
| β (°)                                               | 94.662(4)                                  | 91.557(2)                                             | 103.916(4)                                          |
| γ (°)                                               | 90                                         | 90                                                    | 113.797(4)                                          |
| Cell volume (Å <sup>3</sup> )                       | 1265.65(10)                                | 3438.33(19)                                           | 1872.10(16)                                         |
| T (K)                                               | 200(1)                                     | 200(1)                                                | 200                                                 |
| Wavelength                                          | 1.54178                                    | 1.54178                                               | 0.71073                                             |
| Z                                                   | 4                                          | 4                                                     | 2                                                   |
| Q <sub>calcd</sub> (g.cm <sup>-3</sup> )            | 1.549                                      | 1.315                                                 | 1.323                                               |
| μ (mm <sup>-1</sup> )                               | 9.458                                      | 3.874                                                 | 0.507                                               |
| Scan range (°)                                      | 6.063 < θ < 66.571                         | 4.37 < θ < 66.47                                      | 1.9360 < θ < 32.2830                                |
| Index ranges                                        | -17 ≤ h ≤ 16<br>-5 ≤ k ≤ 8<br>-14 ≤ l ≤ 14 | -11 ≤ h ≤ 10<br>-20 ≤ k ≤ 20<br>-24 ≤ l ≤ 21          | -14 ≤ h ≤ 14<br>-17 ≤ k ≤ 17<br>-20 ≤ l ≤ 20        |
| Reflections (all / independent)                     | 9310 / 2242                                | 26640 / 6066                                          | 25312 / 9219                                        |
| Completeness (%)                                    | 99.9                                       | 99.8                                                  | 99.3                                                |
| R <sub>int</sub>                                    | 0.0471                                     | 0.0505                                                | 0.0892                                              |
| Data / parameters / restraints                      | 2242 / 173 / 0                             | 6066 / 455 / 27                                       | 9219 / 471 / 0                                      |
| Goodness-of-fit on F <sup>2</sup>                   | 1.025                                      | 1.031                                                 | 1.102                                               |
| R1 [I > 2σ(I)] (%)                                  | 3.50                                       | 3.82                                                  | 6.30                                                |
| wR2 (all data) (%)                                  | 9.04                                       | 9.82                                                  | 16.76                                               |
| Largest difference peak and hole (Å <sup>-3</sup> ) | 0.247, -0.290                              | 0.265, -0.341                                         | 1.517, -0.588                                       |

**Figure S50:** Solubility studies by RP-HPLC analysis of compounds **18** (A), **20** (B) and **22** (C), **24** (D) and **27** (E)

A given amount of compounds **18**, **20** and **22** was weighted and suspended in a given volume of tested solvent (DMSO, MeOH, PBS and H<sub>2</sub>O) to reach a theoretical concentration of 1 mM. Suspensions were sonicated for 1 min and shaken at R.T. for 18 h. The resulting solutions were filtrated (pore size 0.2  $\mu$ m) and diluted to 100  $\mu$ M in MeCN (for the solutions in organic solvents). HPLC analysis was performed on Nucleodur C18 column, (100 Å, 5  $\mu$ m, 4.6 x 150 mm, Macherey-Nagel) using MeCN/H<sub>2</sub>O 65:35 at 1 mL/min with detection at 302 nm (**18**, **20** and **22**) or MeCN/H<sub>2</sub>O 55:45 at 1 mL/min with detection at 254 nm (**24** and **27**).

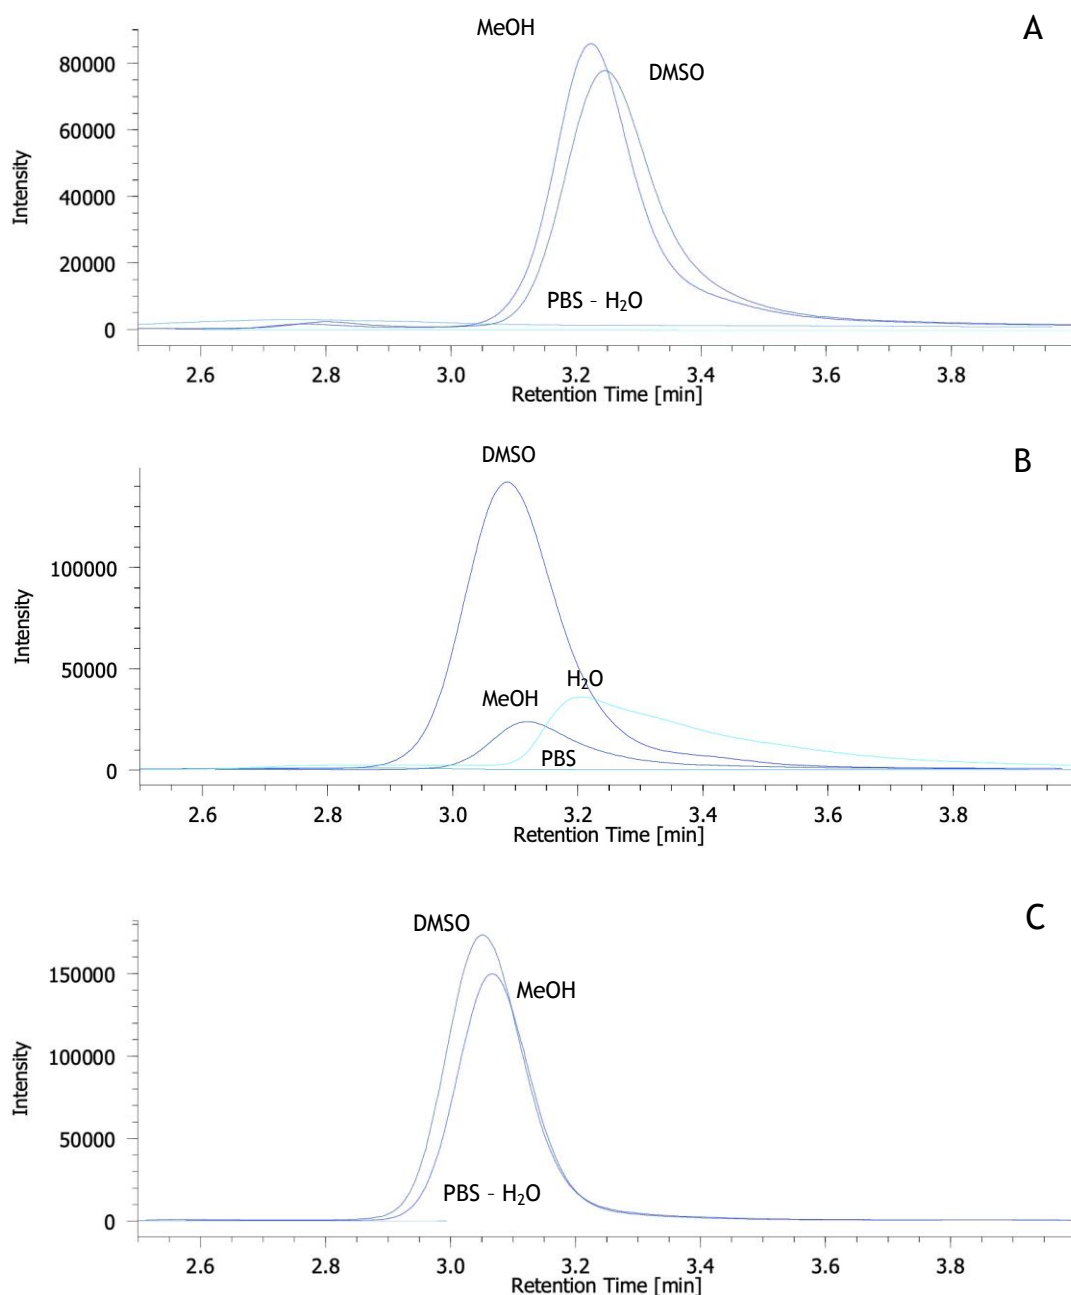

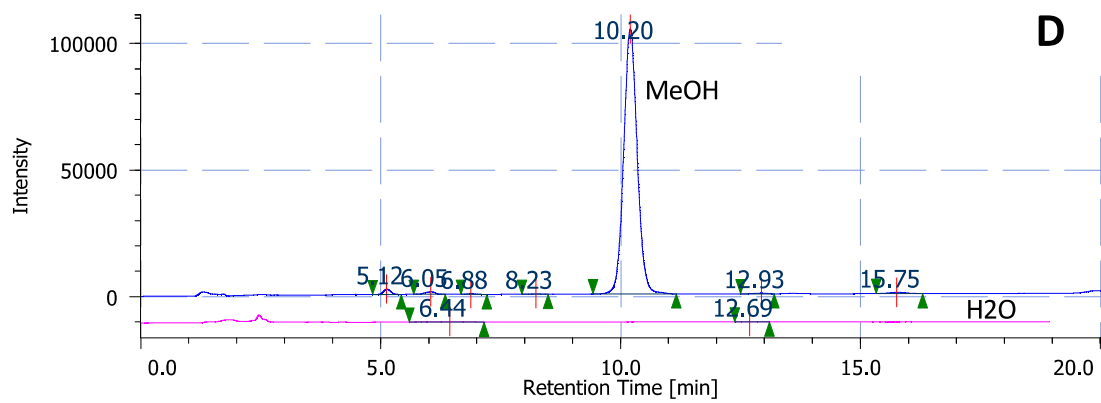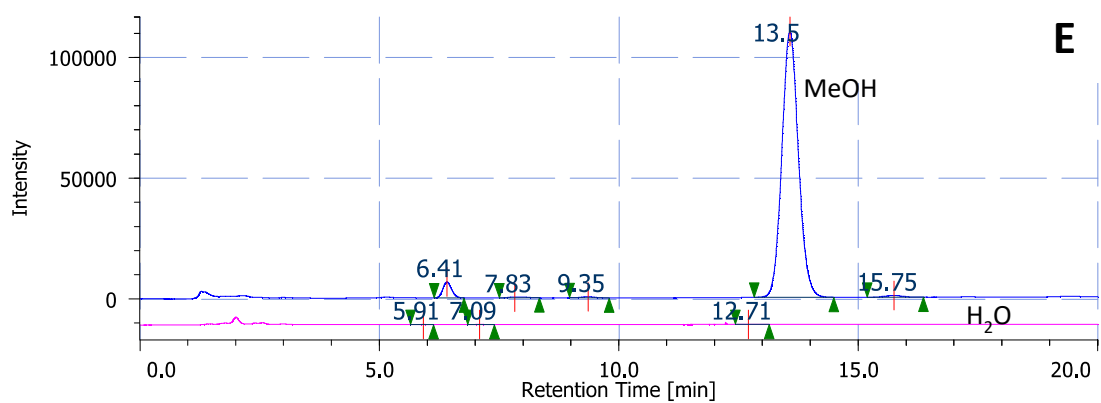



**Figure S51.** UV-vis spectra of compounds **19**, **20**, **22**, **23** and **25** (50  $\mu$ M) treated by HRP (46 nM) and H<sub>2</sub>O<sub>2</sub> (200  $\mu$ M) in 0.2 M TRIS buffer pH 8.1. Conversion to the phenolate form of the quinone methides is assessed by the appearance of the characteristic bands at ca. 570 and 360 nm.

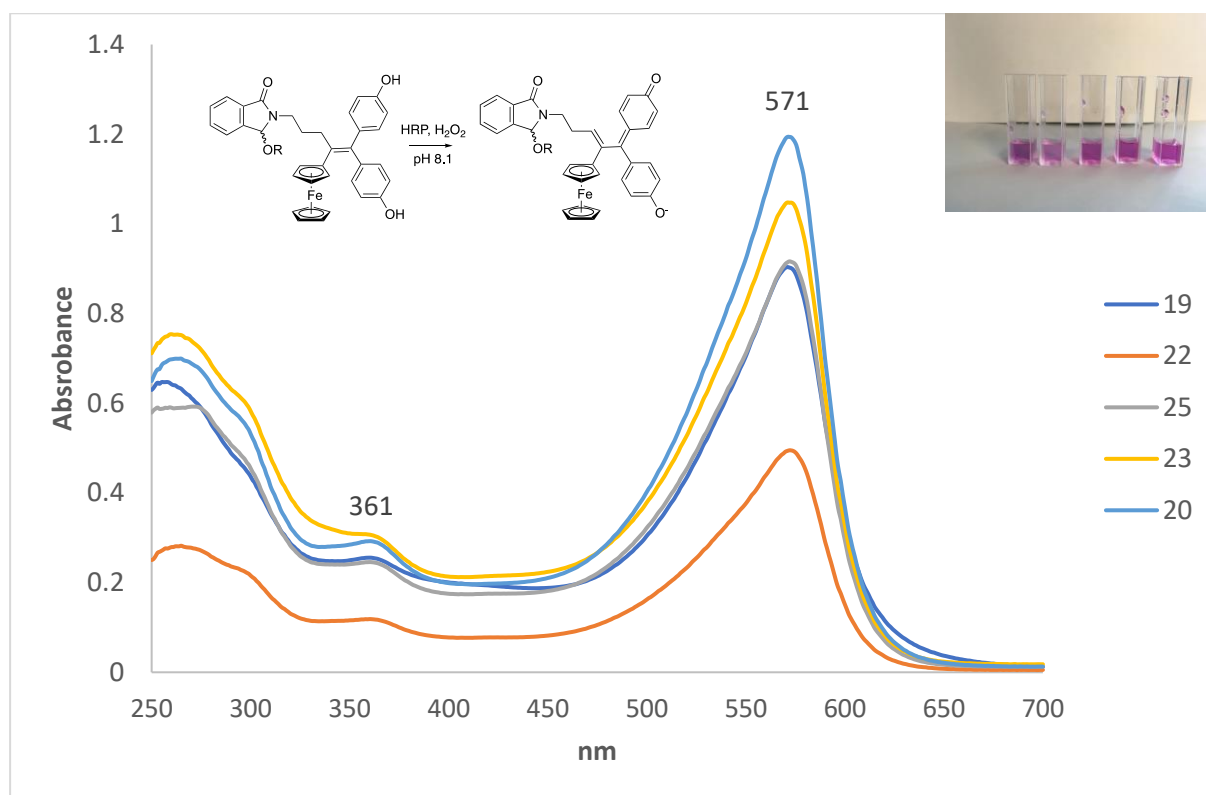

**Figure S52:** MTT cell viability assay for compounds **Fc-OH-TAM-3**, **3h**, **20**, **22**, **23** and **25**.

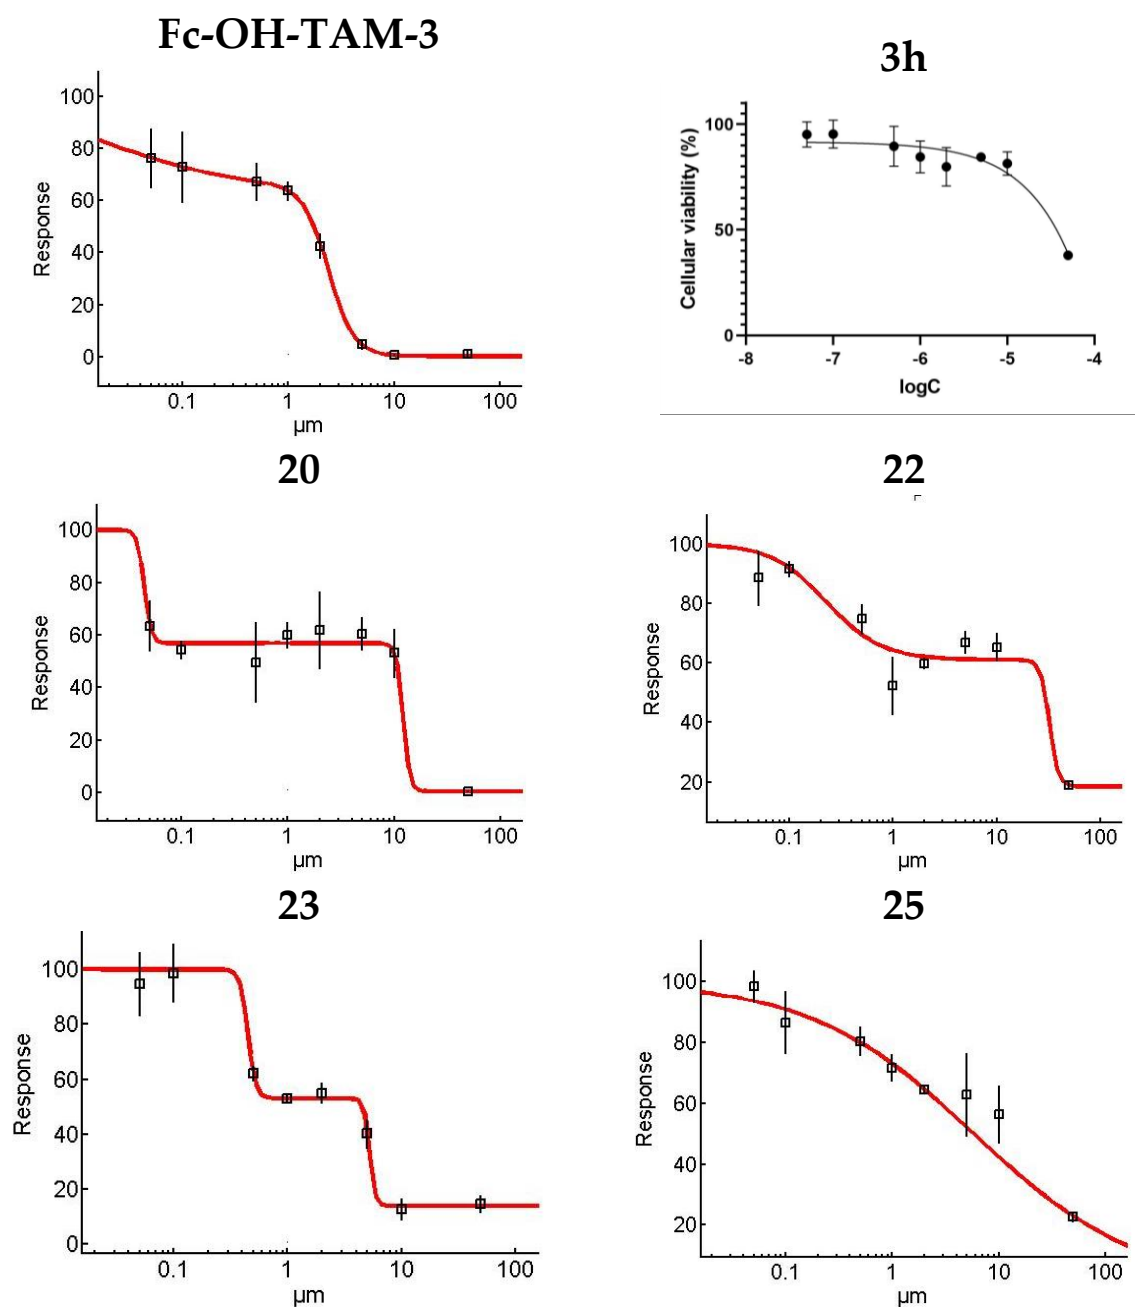

**A:** Fitting of dose-response curves for compounds **Fc-OH-TAM-3**, **3h**, **20**, **22**, **23**, **25** on MCF-7 cells using Dr-Fit Software (Di Veroli et al. Sci. Rep. 2015, 5, 14701) or GraphPad Prism.

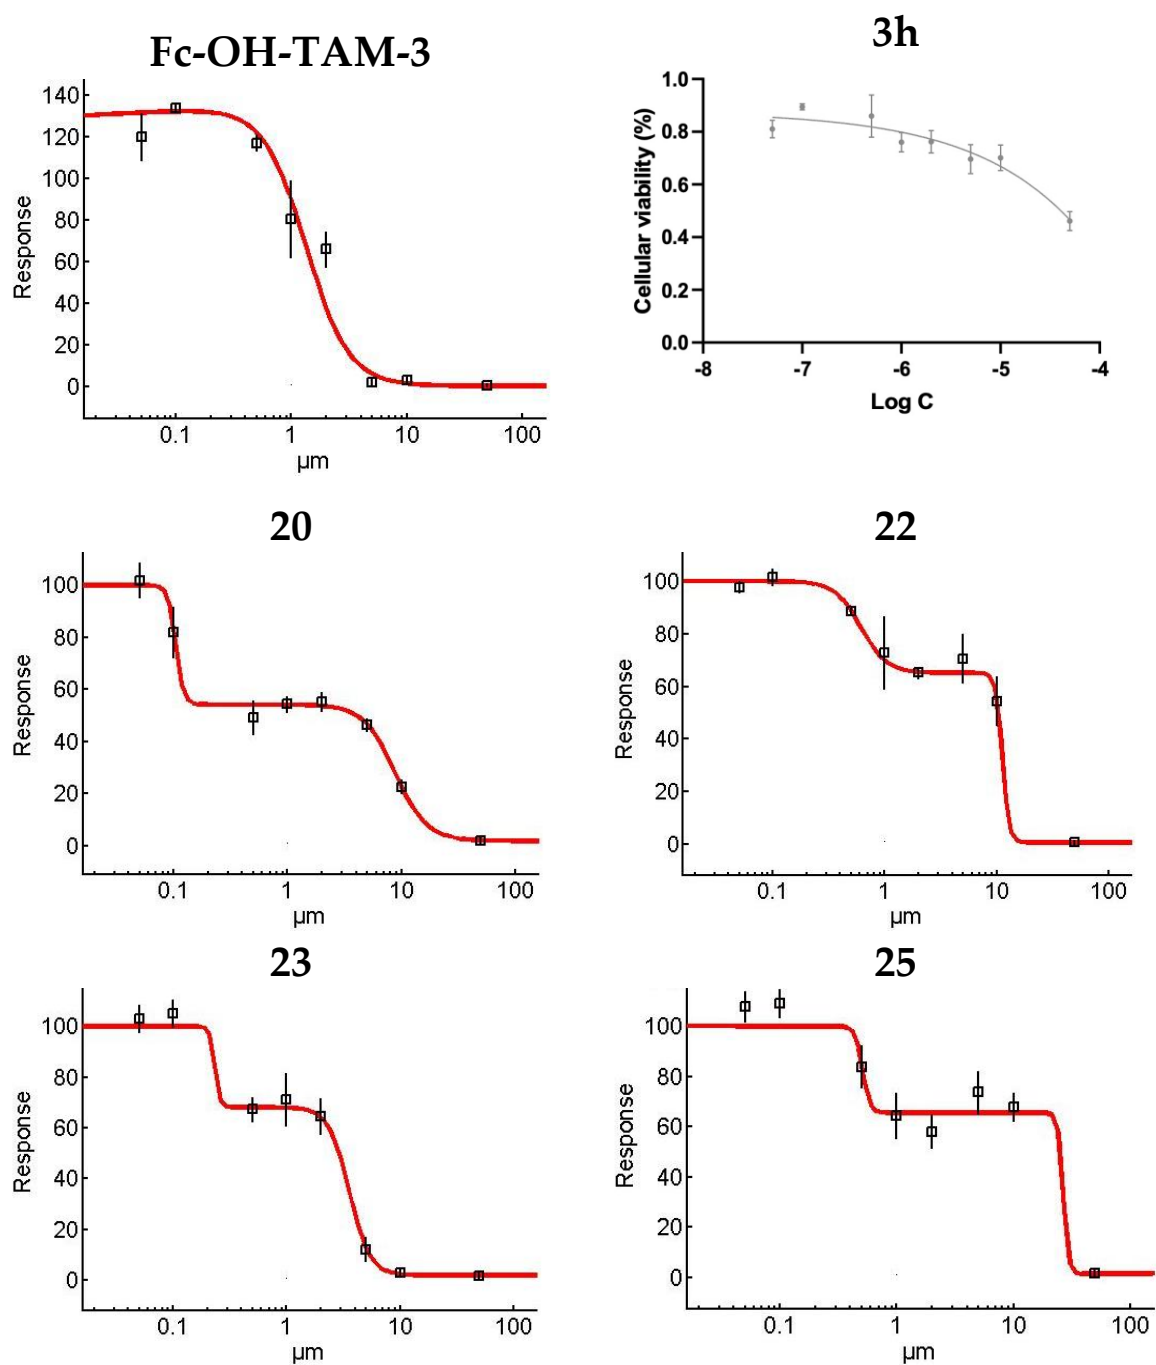

**B:** Fitting of dose-response curves for compounds **Fc-OH-TAM-3**, **3h**, **20**, **22**, **23**, **25** on MDA-MB-231 cells using Dr-Fit Software (Di Veroli et al. Sci. Rep. 2015, 5, 14701) or GraphPad Prism.

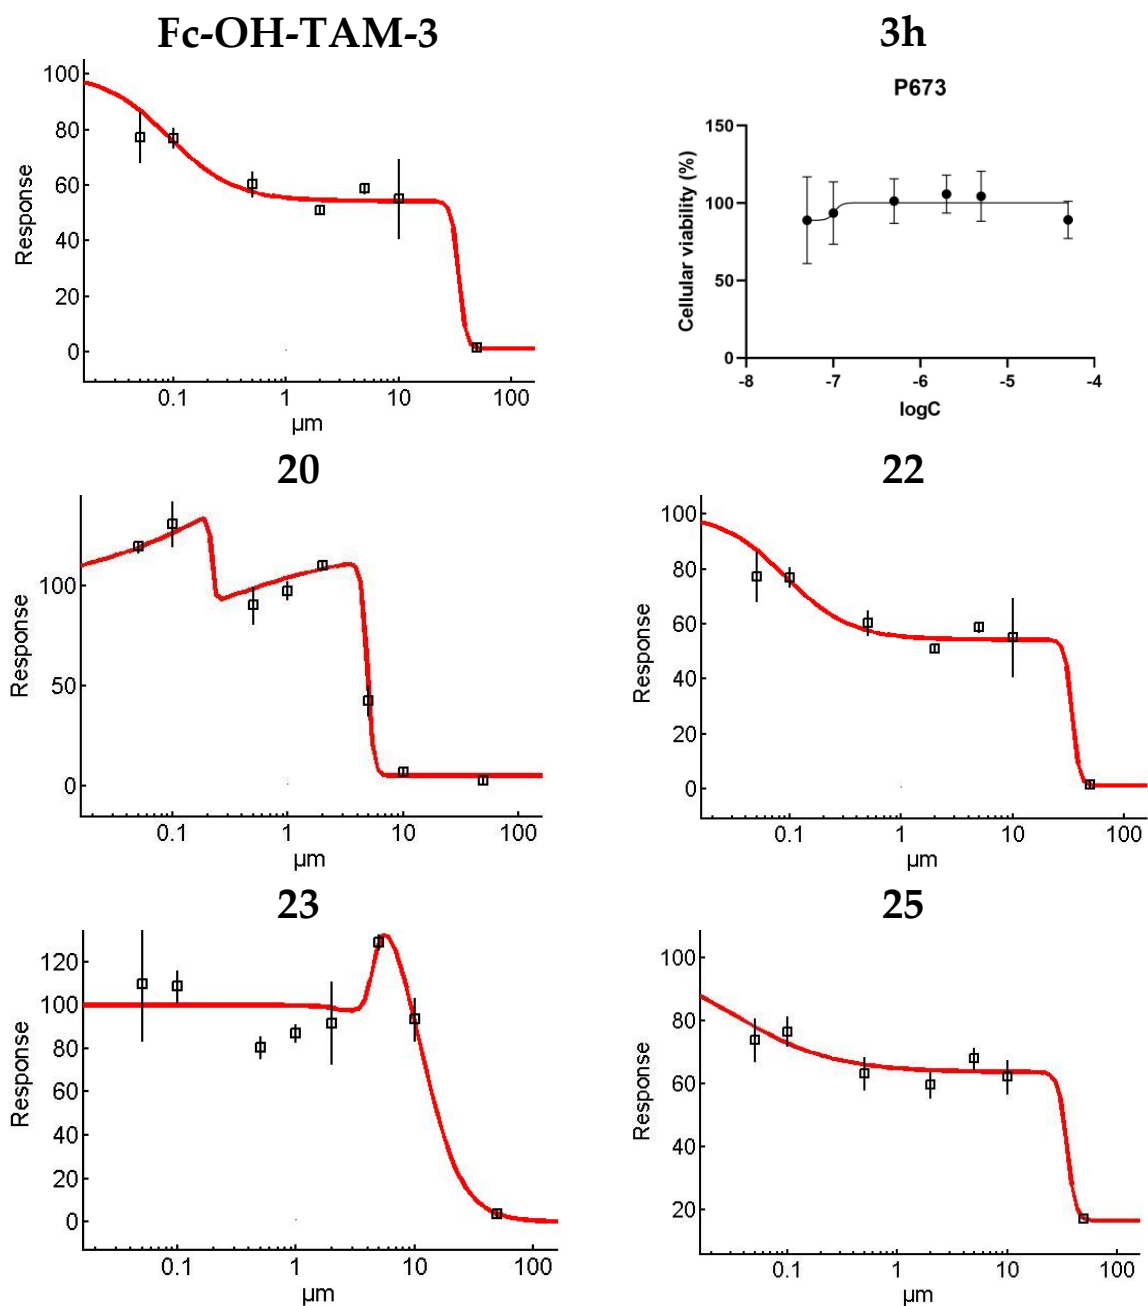

**B:** Fitting of dose-response curves for compounds **Fc-OH-TAM-3**, **3h**, **20**, **22**, **23**, **25** on hTERT-RPE1 cells using Dr-Fit Software (Di Veroli et al. Sci. Rep. 2015, 5, 14701) or GraphPad Prism.

**Figure S53:** HPLC traces for compounds **3h**, **20**, **22**, **23** and **25** (100  $\mu$ M, acetonitrile, DMSO 1%; method loaded for all with acetonitrile/H<sub>2</sub>O = 65/35, except **3h** with acetonitrile/H<sub>2</sub>O = 75/25)

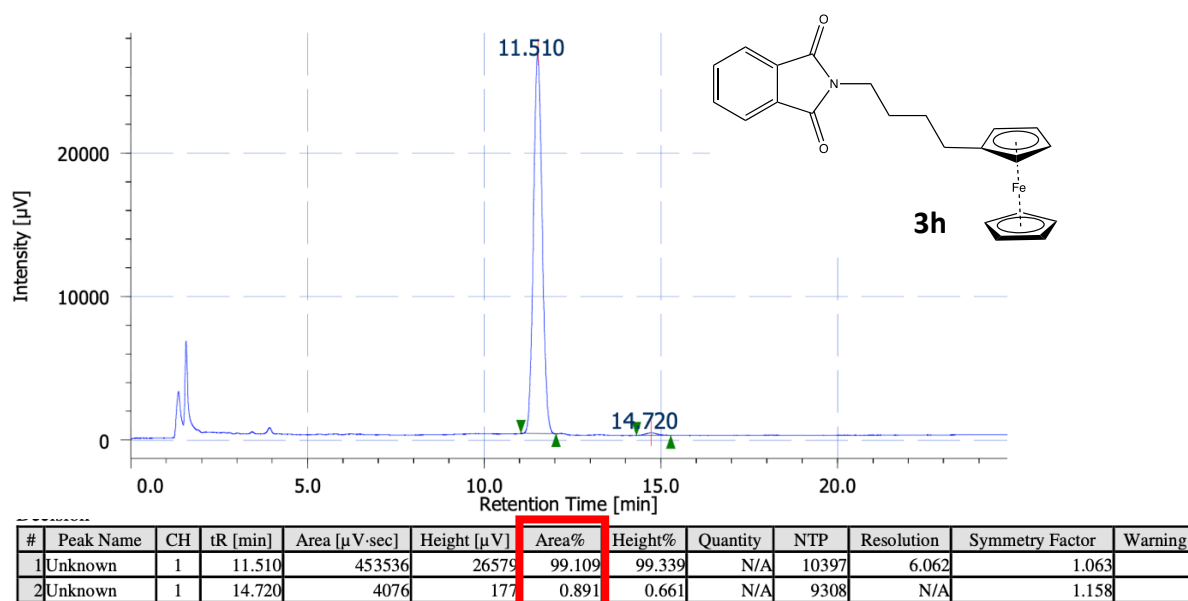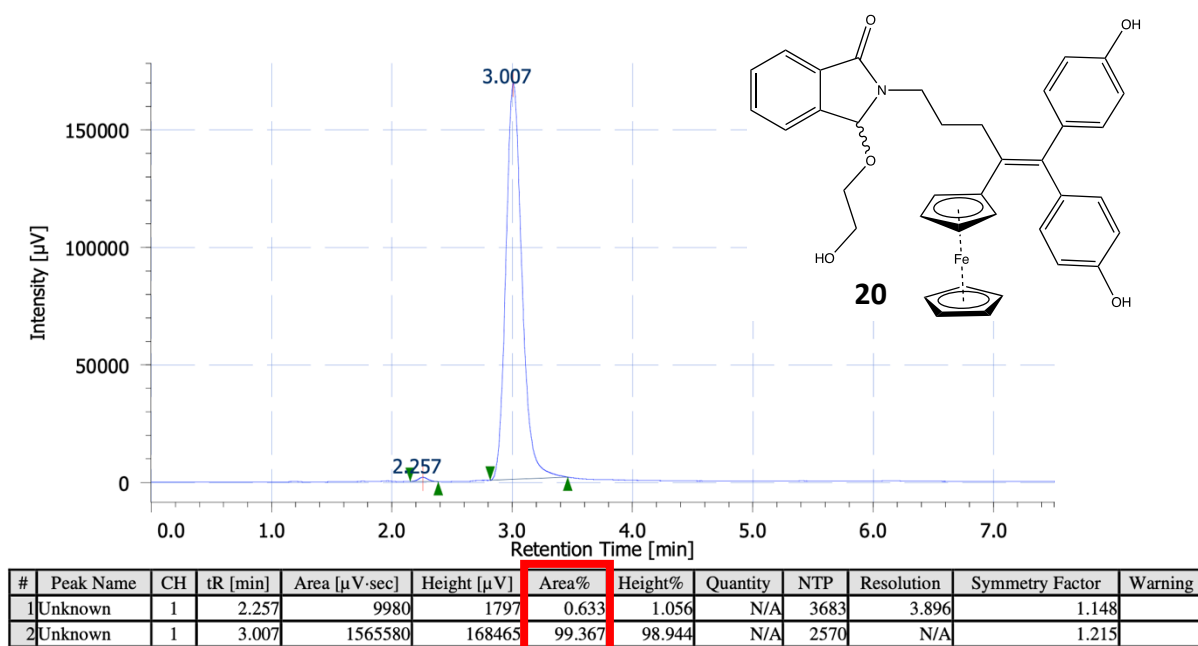

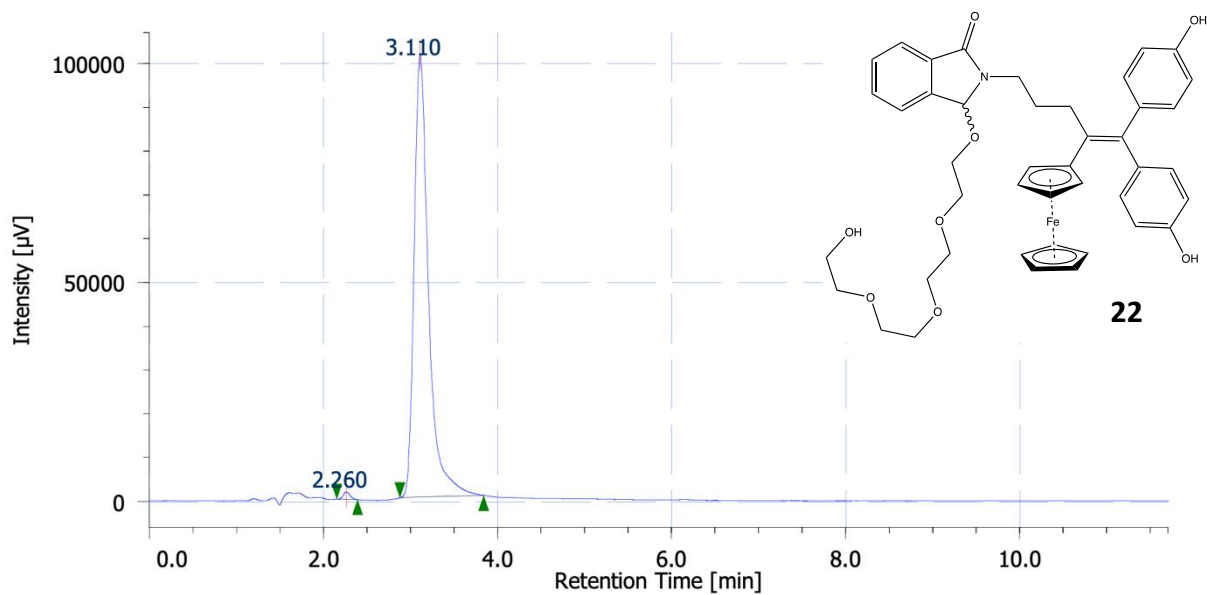

| # | Peak Name | CH | tR [min] | Area [μV·sec] | Height [μV] | Area%  | Height% | Quantity | NTP  | Resolution | Symmetry Factor | Warning |
|---|-----------|----|----------|---------------|-------------|--------|---------|----------|------|------------|-----------------|---------|
| 1 | Unknown   | 1  | 2.260    | 9469          | 1713        | 0.810  | 1.668   | N/A      | 3750 | 4.004      | 1.192           |         |
| 2 | Unknown   | 1  | 3.110    | 1159459       | 100965      | 99.190 | 98.332  | N/A      | 2002 | N/A        | 1.539           |         |

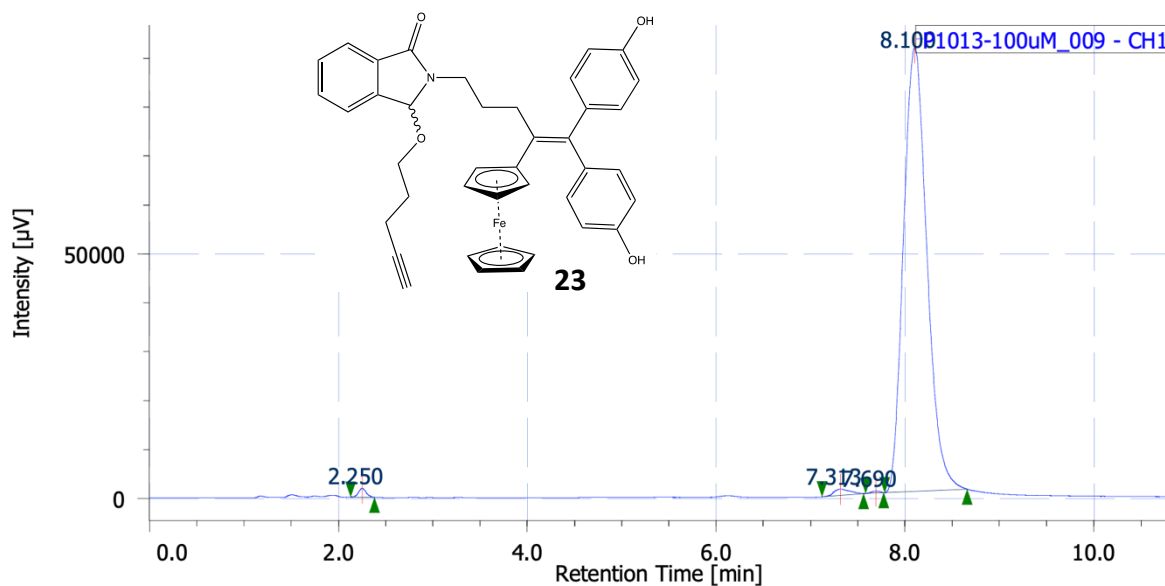

| # | Peak Name | CH | tR [min] | Area [μV·sec] | Height [μV] | Area%  | Height% | Quantity | NTP   | Resolution | Symmetry Factor | Warning |
|---|-----------|----|----------|---------------|-------------|--------|---------|----------|-------|------------|-----------------|---------|
| 1 | Unknown   | 1  | 2.250    | 10286         | 1824        | 0.648  | 1.937   | N/A      | 3652  | 21.801     | 1.126           |         |
| 2 | Unknown   | 1  | 7.313    | 15061         | 1291        | 0.948  | 1.370   | N/A      | 8525  | 1.527      | 1.298           |         |
| 3 | Unknown   | 1  | 7.690    | 2309          | 373         | 0.145  | 0.396   | N/A      | 29899 | 1.299      | 0.922           |         |
| 4 | Unknown   | 1  | 8.100    | 1560587       | 90692       | 98.259 | 96.297  | N/A      | 5075  | N/A        | 1.192           |         |

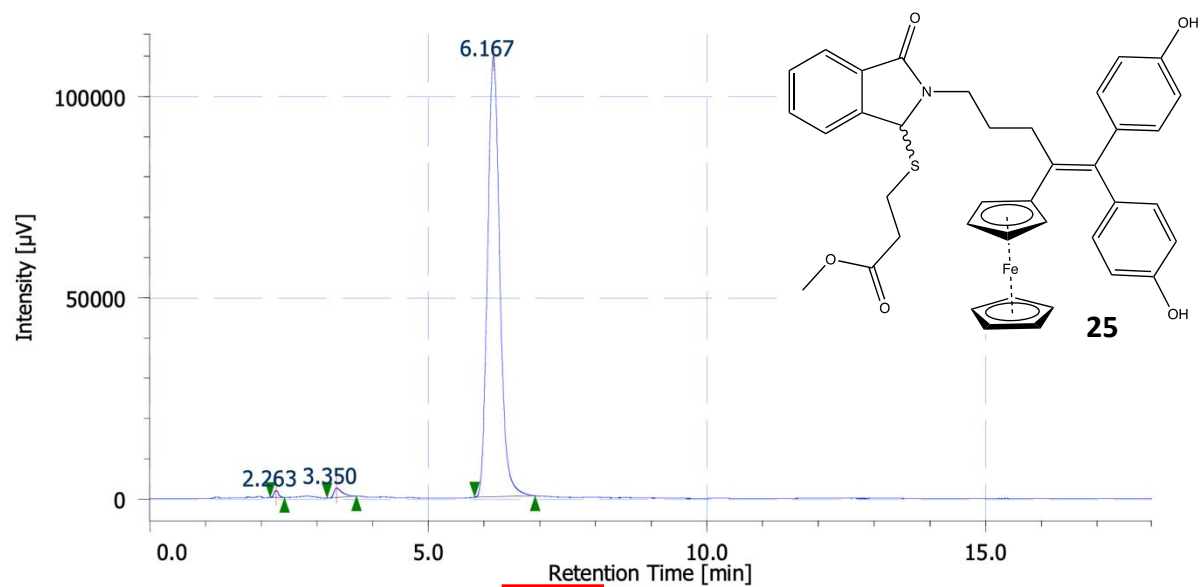

| # | Peak Name | CH | tR [min] | Area [μV-sec] | Height [μV] | Area%  | Height% | Quantity | NTP  | Resolution | Symmetry Factor | Warning |
|---|-----------|----|----------|---------------|-------------|--------|---------|----------|------|------------|-----------------|---------|
| 1 | Unknown   | 1  | 2.263    | 10131         | 180         | 0.594  | 1.588   | N/A      | 3633 | 5.208      | 1.143           |         |
| 2 | Unknown   | 1  | 3.350    | 24972         | 232         | 1.465  | 2.046   | N/A      | 2496 | 8.525      | 2.107           |         |
| 3 | Unknown   | 1  | 6.167    | 1669127       | 10942       | 97.940 | 96.366  | N/A      | 3912 | N/A        | 1.148           |         |
